# Supplementary material for: Reassessing the link between adiposity and head and neck cancer: a Mendelian randomization study
Source: eLife. 2025 Oct 9;14:RP106075. doi: 10.7554/eLife.106075 (PMC12510682; doi:10.7554/eLife.106075)
Supplement: Supplementary file 1. [file elife-106075-supp1.xlsx]

## Sheet: Index
Tab	Table contents
Table A	Harmonised data for main MR analyses (BMI/WHR/WC and HNC/HPC/LA/OC/OPC_NEG/OPC_POS)
Table B	Harmonised data for secondary MR analyses (four body shape principal components and HNC/HPC/LA/OC/OPC_NEG/OPC_POS)
Table C	Harmonised data for secondary MR analyses (childhood and adulthood body size and HNC/HPC/LA/OC/OPC_NEG/OPC_POS)
Table D	Harmonised data for secondary MR analyses (favourable and unfavourable adiposity and HNC/HPC/LA/OC/OPC_NEG/OPC_POS)
Table E	Harmonised data for secondary MR analyses (body fat percentage and HNC/HPC/LA/OC/OPC_NEG/OPC_POS)
Table F	Harmonised data for secondary MR analyses (adipose and brain tissue-specific BMI and HNC/HPC/LA/OC/OPC_NEG/OPC_POS)
Table G	Main (Inverse-variance weighted) and sensitivity (MR-Egger, weighted median, weighted mode) MR results
Table H	Heterogeneity test for the genetically predicted effects of adiposity (BMI/WHR/WC) on HNC risk
Table I	Pleiotropy test for the genetically predicted effects of adiposity (BMI/WHR/WC) on HNC risk
Table J	MR-PRESSO results for the genetically predicted effects of adiposity (BMI/WHR/WC) on HNC risk
Table K	Multivariable MR results for the genetically predicted effect of BMI after accounting for smoking behaviour (CSI/SI)
Table L	MR results for BMI on HNC risk after Steiger filtering SNPs more strongly associated with smoking behaviour than BMI
Table M	MR-Clust results for BMI on HNC risk
Table N	Secondary (Inverse-variance weighted, MR-Egger, weighted median, weighted mode) MR results
Abbreviations: MR, Mendelian randomization; BMI, body mass index; WHR, waist-to-hip ratio; WC, waist circumference; HNC, head and neck cancer; HPC, hypopharyngeal cancer; LA, laryngeal cancer; OC, oral cancer; OPC_NEG, human papillomavirus (HPV ) negative oropharyngeal cancer; OPC_POS, HPV positive oropharyngeal cancer; CSI, comprehensive smoking index; SI, smoking initiation

## Sheet: Table A
Table A. Harmonised data for main MR analyses (BMI/WHR/WC and HNC/HPC/LA/OC/OPC_NEG/OPC_POS)
	SNP	effect_allele.exposure	other_allele.exposure	effect_allele.outcome	other_allele.outcome	beta.exposure	beta.outcome	eaf.exposure	eaf.outcome	remove	palindromic	ambiguous	id.outcome	chr	pos	se.outcome	samplesize.outcome	pval.outcome	outcome	originalname.outcome	outcome.deprecated	mr_keep.outcome	data_source.outcome	proxy.outcome	target_snp.outcome	proxy_snp.outcome	target_a1.outcome	target_a2.outcome	proxy_a1.outcome	proxy_a2.outcome	chr.exposure	pos.exposure	se.exposure	pval.exposure	samplesize.exposure	exposure	mr_keep.exposure	pval_origin.exposure	id.exposure	data_source.exposure	action	SNP_index	mr_keep
BMI-HNC	rs10002111	A	G	A	G	0.0125	0.0219329	0.2227	0.233334	FALSE	FALSE	FALSE	ieu-b-5123	4	67815504	0.0218545	NA	0.315576	HNC_noukb	Head and neck cancer (excl. UKB)	Head and neck cancer (excl. UKB) || ||	TRUE	igd	NA	NA	NA	NA	NA	NA	NA	4	67815504	0.0021	1.257e-09	718668	BMI_strict	TRUE	reported	HKLPXU	textfile	2	1	TRUE
	rs10033843	A	G	A	G	0.014	-0.00421327	0.215	0.206768	FALSE	FALSE	FALSE	ieu-b-5123	4	77028783	0.022724	NA	0.852907	HNC_noukb	Head and neck cancer (excl. UKB)	Head and neck cancer (excl. UKB) || ||	TRUE	igd	NA	NA	NA	NA	NA	NA	NA	4	77028783	0.0021	1.073e-11	714618	BMI_strict	TRUE	reported	HKLPXU	textfile	2	1	TRUE
	rs10050620	T	C	T	C	-0.013	0.0118283	0.3308	0.325044	FALSE	FALSE	FALSE	ieu-b-5123	5	63927239	0.0196988	NA	0.548199	HNC_noukb	Head and neck cancer (excl. UKB)	Head and neck cancer (excl. UKB) || ||	TRUE	igd	NA	NA	NA	NA	NA	NA	NA	5	63927239	0.002	1.198e-10	484680	BMI_strict	TRUE	reported	HKLPXU	textfile	2	1	TRUE
	rs1006317	T	G	T	G	0.016	0.0242147	0.1268	0.130408	FALSE	FALSE	FALSE	ieu-b-5123	1	209552636	0.0274618	NA	0.377907	HNC_noukb	Head and neck cancer (excl. UKB)	Head and neck cancer (excl. UKB) || ||	TRUE	igd	NA	NA	NA	NA	NA	NA	NA	1	209552636	0.0026	3.749e-10	717508	BMI_strict	TRUE	reported	HKLPXU	textfile	2	1	TRUE
	rs10099330	A	G	A	G	-0.0119	-0.00705209	0.538	0.561857	FALSE	FALSE	FALSE	ieu-b-5123	8	143383694	0.0185921	NA	0.704461	HNC_noukb	Head and neck cancer (excl. UKB)	Head and neck cancer (excl. UKB) || ||	TRUE	igd	NA	NA	NA	NA	NA	NA	NA	8	143383694	0.0017	3.218e-12	714811	BMI_strict	TRUE	reported	HKLPXU	textfile	2	1	TRUE
	rs10101364	T	C	T	C	0.012	-0.0156604	0.6801	0.680732	FALSE	FALSE	FALSE	ieu-b-5123	8	20634888	0.0197573	NA	0.427988	HNC_noukb	Head and neck cancer (excl. UKB)	Head and neck cancer (excl. UKB) || ||	TRUE	igd	NA	NA	NA	NA	NA	NA	NA	8	20634888	0.0018	5.607e-11	711583	BMI_strict	TRUE	reported	HKLPXU	textfile	2	1	TRUE
	rs10121187	C	G	C	G	0.0102	0.0107771	0.509	0.519306	FALSE	TRUE	TRUE	ieu-b-5123	9	29737191	0.0183827	NA	0.5577	HNC_noukb	Head and neck cancer (excl. UKB)	Head and neck cancer (excl. UKB) || ||	TRUE	igd	NA	NA	NA	NA	NA	NA	NA	9	29737191	0.0017	2.016e-09	718682	BMI_strict	TRUE	reported	HKLPXU	textfile	2	1	FALSE
	rs10132280	A	C	A	C	-0.0214	0.054963	0.311	0.297583	FALSE	FALSE	FALSE	ieu-b-5123	14	25928179	0.020184	NA	0.00646711	HNC_noukb	Head and neck cancer (excl. UKB)	Head and neck cancer (excl. UKB) || ||	TRUE	igd	NA	NA	NA	NA	NA	NA	NA	14	25928179	0.0018	2.283e-33	806477	BMI_strict	TRUE	reported	HKLPXU	textfile	2	1	TRUE
	rs10145749	T	C	T	C	0.0161	-0.0327915	0.1549	0.142742	FALSE	FALSE	FALSE	ieu-b-5123	14	102782109	0.026385	NA	0.213939	HNC_noukb	Head and neck cancer (excl. UKB)	Head and neck cancer (excl. UKB) || ||	TRUE	igd	NA	NA	NA	NA	NA	NA	NA	14	102782109	0.0026	8.325e-10	484680	BMI_strict	TRUE	reported	HKLPXU	textfile	2	1	TRUE
	rs10168563	A	G	A	G	0.0126	0.05526	0.7031	0.706131	FALSE	FALSE	FALSE	ieu-b-5123	2	35558345	0.0204831	NA	0.00697927	HNC_noukb	Head and neck cancer (excl. UKB)	Head and neck cancer (excl. UKB) || ||	TRUE	igd	TRUE	rs10168563	rs7579183	G	A	A	G	2	35552173	0.0018	9.334e-12	718585	BMI_strict	TRUE	reported	HKLPXU	textfile	2	1	TRUE
	rs10169594	T	C	T	C	-0.012	-0.013835	0.6475	0.636924	FALSE	FALSE	FALSE	ieu-b-5123	2	41637688	0.0192142	NA	0.471503	HNC_noukb	Head and neck cancer (excl. UKB)	Head and neck cancer (excl. UKB) || ||	TRUE	igd	NA	NA	NA	NA	NA	NA	NA	2	41637688	0.0018	1.338e-11	718035	BMI_strict	TRUE	reported	HKLPXU	textfile	2	1	TRUE
	rs10182181	A	G	A	G	-0.0327	0.0022484	0.5052	0.522736	FALSE	FALSE	FALSE	ieu-b-5123	2	25150296	0.0183146	NA	0.902293	HNC_noukb	Head and neck cancer (excl. UKB)	Head and neck cancer (excl. UKB) || ||	TRUE	igd	NA	NA	NA	NA	NA	NA	NA	2	25150296	0.0016	2.45e-91	806439	BMI_strict	TRUE	reported	HKLPXU	textfile	2	1	TRUE
	rs10185199	A	G	A	G	-0.0143	-0.0249699	0.286	0.280667	FALSE	FALSE	FALSE	ieu-b-5123	2	40282202	0.0213172	NA	0.241458	HNC_noukb	Head and neck cancer (excl. UKB)	Head and neck cancer (excl. UKB) || ||	TRUE	igd	NA	NA	NA	NA	NA	NA	NA	2	40282202	0.002	3.178e-13	706553	BMI_strict	TRUE	reported	HKLPXU	textfile	2	1	TRUE
	rs10197031	T	C	T	C	-0.0161	-0.0296111	0.7262	0.716988	FALSE	FALSE	FALSE	ieu-b-5123	2	105454590	0.020532	NA	0.149248	HNC_noukb	Head and neck cancer (excl. UKB)	Head and neck cancer (excl. UKB) || ||	TRUE	igd	NA	NA	NA	NA	NA	NA	NA	2	105454590	0.0019	5.047e-18	718456	BMI_strict	TRUE	reported	HKLPXU	textfile	2	1	TRUE
	rs10261050	T	C	T	C	0.0113	-0.00149666	0.4754	0.461488	FALSE	FALSE	FALSE	ieu-b-5123	7	114337652	0.0185371	NA	0.93565	HNC_noukb	Head and neck cancer (excl. UKB)	Head and neck cancer (excl. UKB) || ||	TRUE	igd	NA	NA	NA	NA	NA	NA	NA	7	114337652	0.0017	4.533e-11	718350	BMI_strict	TRUE	reported	HKLPXU	textfile	2	1	TRUE
	rs10499694	A	G	A	G	0.013	-0.0283772	0.4935	0.482786	FALSE	FALSE	FALSE	ieu-b-5123	7	50614173	0.0184338	NA	0.123705	HNC_noukb	Head and neck cancer (excl. UKB)	Head and neck cancer (excl. UKB) || ||	TRUE	igd	NA	NA	NA	NA	NA	NA	NA	7	50614173	0.0016	1.285e-15	806696	BMI_strict	TRUE	reported	HKLPXU	textfile	2	1	TRUE
	rs10506971	A	G	A	G	-0.0142	-0.0148742	0.5521	0.538404	FALSE	FALSE	FALSE	ieu-b-5123	12	89757937	0.0187975	NA	0.428778	HNC_noukb	Head and neck cancer (excl. UKB)	Head and neck cancer (excl. UKB) || ||	TRUE	igd	NA	NA	NA	NA	NA	NA	NA	12	89757937	0.0017	4.686e-17	717231	BMI_strict	TRUE	reported	HKLPXU	textfile	2	1	TRUE
	rs10510419	T	G	T	G	-0.0168	-0.004065	0.1467	0.144281	FALSE	FALSE	FALSE	ieu-b-5123	3	12426936	0.0263133	NA	0.877228	HNC_noukb	Head and neck cancer (excl. UKB)	Head and neck cancer (excl. UKB) || ||	TRUE	igd	NA	NA	NA	NA	NA	NA	NA	3	12426936	0.0023	2.233e-13	800535	BMI_strict	TRUE	reported	HKLPXU	textfile	2	1	TRUE
	rs10518694	A	C	A	C	0.0144	-0.0175581	0.1394	0.141542	FALSE	FALSE	FALSE	ieu-b-5123	15	53072673	0.0266811	NA	0.510493	HNC_noukb	Head and neck cancer (excl. UKB)	Head and neck cancer (excl. UKB) || ||	TRUE	igd	NA	NA	NA	NA	NA	NA	NA	15	53072673	0.0024	3.431e-09	718281	BMI_strict	TRUE	reported	HKLPXU	textfile	2	1	TRUE
	rs10733682	A	G	A	G	0.0148	0.00930784	0.4594	0.48701	FALSE	FALSE	FALSE	ieu-b-5123	9	129460914	0.018776	NA	0.620085	HNC_noukb	Head and neck cancer (excl. UKB)	Head and neck cancer (excl. UKB) || ||	TRUE	igd	NA	NA	NA	NA	NA	NA	NA	9	129460914	0.0016	1.755e-19	805407	BMI_strict	TRUE	reported	HKLPXU	textfile	2	1	TRUE
	rs10741329	A	G	A	G	0.0115	0.0445447	0.6944	0.683727	FALSE	FALSE	FALSE	ieu-b-5123	11	89997796	0.0200105	NA	0.0260094	HNC_noukb	Head and neck cancer (excl. UKB)	Head and neck cancer (excl. UKB) || ||	TRUE	igd	NA	NA	NA	NA	NA	NA	NA	11	89997796	0.0018	3.914e-10	718412	BMI_strict	TRUE	reported	HKLPXU	textfile	2	1	TRUE
	rs10742752	T	C	T	C	-0.0123	0.0010939	0.3761	0.391023	FALSE	FALSE	FALSE	ieu-b-5123	11	45438374	0.0188777	NA	0.953791	HNC_noukb	Head and neck cancer (excl. UKB)	Head and neck cancer (excl. UKB) || ||	TRUE	igd	NA	NA	NA	NA	NA	NA	NA	11	45438374	0.0017	1.203e-13	806700	BMI_strict	TRUE	reported	HKLPXU	textfile	2	1	TRUE
	rs1075901	T	C	T	C	-0.0118	-0.0201931	0.4516	0.444498	FALSE	FALSE	FALSE	ieu-b-5123	17	15943910	0.0186296	NA	0.278398	HNC_noukb	Head and neck cancer (excl. UKB)	Head and neck cancer (excl. UKB) || ||	TRUE	igd	NA	NA	NA	NA	NA	NA	NA	17	15943910	0.0016	4.431e-13	806810	BMI_strict	TRUE	reported	HKLPXU	textfile	2	1	TRUE
	rs10761785	T	G	T	G	-0.0133	-0.0152854	0.5136	0.514699	FALSE	FALSE	FALSE	ieu-b-5123	10	65321147	0.0184247	NA	0.406755	HNC_noukb	Head and neck cancer (excl. UKB)	Head and neck cancer (excl. UKB) || ||	TRUE	igd	TRUE	rs10761785	rs12245149	G	T	A	C	10	65318766	0.0016	3.467e-16	806365	BMI_strict	TRUE	reported	HKLPXU	textfile	2	1	TRUE
	rs10772983	T	C	T	C	-0.01	0.0141762	0.5394	0.513347	FALSE	FALSE	FALSE	ieu-b-5123	12	17141582	0.0183695	NA	0.440276	HNC_noukb	Head and neck cancer (excl. UKB)	Head and neck cancer (excl. UKB) || ||	TRUE	igd	NA	NA	NA	NA	NA	NA	NA	12	17141582	0.0016	6.209e-10	804927	BMI_strict	TRUE	reported	HKLPXU	textfile	2	1	TRUE
	rs10779751	A	G	A	G	0.0131	-0.0056314	0.2787	0.286878	FALSE	FALSE	FALSE	ieu-b-5123	1	11284336	0.0211645	NA	0.790178	HNC_noukb	Head and neck cancer (excl. UKB)	Head and neck cancer (excl. UKB) || ||	TRUE	igd	NA	NA	NA	NA	NA	NA	NA	1	11284336	0.0018	2.657e-13	806531	BMI_strict	TRUE	reported	HKLPXU	textfile	2	1	TRUE
	rs10788494	C	G	C	G	0.0132	0.00823191	0.4835	0.494498	FALSE	TRUE	TRUE	ieu-b-5123	10	88110925	0.0183907	NA	0.654433	HNC_noukb	Head and neck cancer (excl. UKB)	Head and neck cancer (excl. UKB) || ||	TRUE	igd	NA	NA	NA	NA	NA	NA	NA	10	88110925	0.0017	5.507e-15	718328	BMI_strict	TRUE	reported	HKLPXU	textfile	2	1	FALSE
	rs10829164	T	C	T	C	0.0151	0.00938436	0.1468	0.141816	FALSE	FALSE	FALSE	ieu-b-5123	10	27318370	0.0263496	NA	0.72173	HNC_noukb	Head and neck cancer (excl. UKB)	Head and neck cancer (excl. UKB) || ||	TRUE	igd	NA	NA	NA	NA	NA	NA	NA	10	27318370	0.0024	2.365e-10	718703	BMI_strict	TRUE	reported	HKLPXU	textfile	2	1	TRUE
	rs10842240	C	G	C	G	0.0195	-0.00966448	0.1256	0.132054	FALSE	TRUE	FALSE	ieu-b-5123	12	24068456	0.0272635	NA	0.722976	HNC_noukb	Head and neck cancer (excl. UKB)	Head and neck cancer (excl. UKB) || ||	TRUE	igd	TRUE	rs10842240	rs7298352	C	G	G	C	12	24060075	0.0025	1.211e-14	718478	BMI_strict	TRUE	reported	HKLPXU	textfile	2	1	TRUE
	rs10858334	C	G	C	G	-0.0148	0.0245695	0.8484	0.860034	FALSE	TRUE	FALSE	ieu-b-5123	9	137989785	0.0268298	NA	0.359796	HNC_noukb	Head and neck cancer (excl. UKB)	Head and neck cancer (excl. UKB) || ||	TRUE	igd	NA	NA	NA	NA	NA	NA	NA	9	137989785	0.0025	4.914e-09	707975	BMI_strict	TRUE	reported	HKLPXU	textfile	2	1	TRUE
	rs10909880	T	C	T	C	-0.0135	-0.0282797	0.4522	0.449629	FALSE	FALSE	FALSE	ieu-b-5123	1	2727804	0.0186758	NA	0.129964	HNC_noukb	Head and neck cancer (excl. UKB)	Head and neck cancer (excl. UKB) || ||	TRUE	igd	NA	NA	NA	NA	NA	NA	NA	1	2727804	0.0016	2.205e-16	775594	BMI_strict	TRUE	reported	HKLPXU	textfile	2	1	TRUE
	rs10920336	A	G	A	G	-0.0101	0.0158233	0.5327	0.510067	FALSE	FALSE	FALSE	ieu-b-5123	1	202115945	0.0184689	NA	0.39158	HNC_noukb	Head and neck cancer (excl. UKB)	Head and neck cancer (excl. UKB) || ||	TRUE	igd	NA	NA	NA	NA	NA	NA	NA	1	202115945	0.0017	4.197e-09	704432	BMI_strict	TRUE	reported	HKLPXU	textfile	2	1	TRUE
	rs10920678	A	G	A	G	0.0149	0.0153878	0.425	0.430228	FALSE	FALSE	FALSE	ieu-b-5123	1	190239907	0.0185378	NA	0.406493	HNC_noukb	Head and neck cancer (excl. UKB)	Head and neck cancer (excl. UKB) || ||	TRUE	igd	NA	NA	NA	NA	NA	NA	NA	1	190239907	0.0016	7.148e-20	805921	BMI_strict	TRUE	reported	HKLPXU	textfile	2	1	TRUE
	rs10929925	A	C	A	C	-0.0142	-0.0130898	0.4105	0.43006	FALSE	FALSE	FALSE	ieu-b-5123	2	6155557	0.0186971	NA	0.483866	HNC_noukb	Head and neck cancer (excl. UKB)	Head and neck cancer (excl. UKB) || ||	TRUE	igd	NA	NA	NA	NA	NA	NA	NA	2	6155557	0.0016	3.045e-18	801209	BMI_strict	TRUE	reported	HKLPXU	textfile	2	1	TRUE
	rs10938397	A	G	A	G	-0.0322	0.00785962	0.57	0.569181	FALSE	FALSE	FALSE	ieu-b-5123	4	45182527	0.0186736	NA	0.673833	HNC_noukb	Head and neck cancer (excl. UKB)	Head and neck cancer (excl. UKB) || ||	TRUE	igd	NA	NA	NA	NA	NA	NA	NA	4	45182527	0.0016	2.42e-86	805635	BMI_strict	TRUE	reported	HKLPXU	textfile	2	1	TRUE
	rs10942267	A	G	A	G	0.0148	-0.0468938	0.6927	0.689196	FALSE	FALSE	FALSE	ieu-b-5123	5	80841914	0.0199102	NA	0.0185093	HNC_noukb	Head and neck cancer (excl. UKB)	Head and neck cancer (excl. UKB) || ||	TRUE	igd	NA	NA	NA	NA	NA	NA	NA	5	80841914	0.0018	6.532e-16	718640	BMI_strict	TRUE	reported	HKLPXU	textfile	2	1	TRUE
	rs10962550	C	G	C	G	0.0186	0.0194151	0.1756	0.185836	FALSE	TRUE	FALSE	ieu-b-5123	9	16720329	0.0239171	NA	0.416927	HNC_noukb	Head and neck cancer (excl. UKB)	Head and neck cancer (excl. UKB) || ||	TRUE	igd	NA	NA	NA	NA	NA	NA	NA	9	16720329	0.0022	5.675e-17	718060	BMI_strict	TRUE	reported	HKLPXU	textfile	2	1	TRUE
	rs10968114	A	C	A	C	0.0113	0.0101559	0.5331	0.529612	FALSE	FALSE	FALSE	ieu-b-5123	9	27800007	0.0184868	NA	0.58276	HNC_noukb	Head and neck cancer (excl. UKB)	Head and neck cancer (excl. UKB) || ||	TRUE	igd	NA	NA	NA	NA	NA	NA	NA	9	27800007	0.0017	3.302e-11	718364	BMI_strict	TRUE	reported	HKLPXU	textfile	2	1	TRUE
	rs10975933	C	G	C	G	0.0114	0.0356219	0.6634	0.687833	FALSE	TRUE	FALSE	ieu-b-5123	9	6962574	0.0199893	NA	0.0747429	HNC_noukb	Head and neck cancer (excl. UKB)	Head and neck cancer (excl. UKB) || ||	TRUE	igd	TRUE	rs10975933	rs10815490	G	C	C	T	9	6954557	0.0018	2.065e-10	718391	BMI_strict	TRUE	reported	HKLPXU	textfile	2	1	TRUE
	rs10992867	A	G	A	G	0.0162	-0.0076421	0.2687	0.258916	FALSE	FALSE	FALSE	ieu-b-5123	9	96461013	0.0211512	NA	0.71787	HNC_noukb	Head and neck cancer (excl. UKB)	Head and neck cancer (excl. UKB) || ||	TRUE	igd	NA	NA	NA	NA	NA	NA	NA	9	96461013	0.0019	3.195e-17	718610	BMI_strict	TRUE	reported	HKLPXU	textfile	2	1	TRUE
	rs11030618	T	C	T	C	0.011	-0.0076996	0.5786	0.556921	FALSE	FALSE	FALSE	ieu-b-5123	11	29243293	0.0185587	NA	0.678232	HNC_noukb	Head and neck cancer (excl. UKB)	Head and neck cancer (excl. UKB) || ||	TRUE	igd	NA	NA	NA	NA	NA	NA	NA	11	29243293	0.0017	1.673e-10	718309	BMI_strict	TRUE	reported	HKLPXU	textfile	2	1	TRUE
	rs11044430	A	T	A	T	0.0161	0.0295186	0.844	0.850547	FALSE	TRUE	FALSE	ieu-b-5123	12	19287416	0.0262427	NA	0.26066	HNC_noukb	Head and neck cancer (excl. UKB)	Head and neck cancer (excl. UKB) || ||	TRUE	igd	NA	NA	NA	NA	NA	NA	NA	12	19287416	0.0023	3.765e-12	718664	BMI_strict	TRUE	reported	HKLPXU	textfile	2	1	TRUE
	rs11066188	A	G	A	G	-0.0114	-0.0614106	0.3762	0.407228	FALSE	FALSE	FALSE	ieu-b-5123	12	112610714	0.0187271	NA	0.00104088	HNC_noukb	Head and neck cancer (excl. UKB)	Head and neck cancer (excl. UKB) || ||	TRUE	igd	NA	NA	NA	NA	NA	NA	NA	12	112610714	0.0016	3.053e-12	805492	BMI_strict	TRUE	reported	HKLPXU	textfile	2	1	TRUE
	rs11078883	C	G	C	G	-0.0126	-0.0138583	0.654	0.657435	FALSE	TRUE	FALSE	ieu-b-5123	17	2138828	0.0195666	NA	0.478781	HNC_noukb	Head and neck cancer (excl. UKB)	Head and neck cancer (excl. UKB) || ||	TRUE	igd	NA	NA	NA	NA	NA	NA	NA	17	2138828	0.0018	1.299e-12	718501	BMI_strict	TRUE	reported	HKLPXU	textfile	2	1	TRUE
	rs11105839	A	T	A	T	-0.0113	-0.0175091	0.3729	0.373216	FALSE	TRUE	FALSE	ieu-b-5123	12	91237920	0.019048	NA	0.357985	HNC_noukb	Head and neck cancer (excl. UKB)	Head and neck cancer (excl. UKB) || ||	TRUE	igd	NA	NA	NA	NA	NA	NA	NA	12	91237920	0.0017	1.248e-11	801313	BMI_strict	TRUE	reported	HKLPXU	textfile	2	1	TRUE
	rs11115176	T	C	T	C	0.0131	0.0263301	0.7839	0.76533	FALSE	FALSE	FALSE	ieu-b-5123	12	82465797	0.0216653	NA	0.224247	HNC_noukb	Head and neck cancer (excl. UKB)	Head and neck cancer (excl. UKB) || ||	TRUE	igd	NA	NA	NA	NA	NA	NA	NA	12	82465797	0.0019	6.793e-12	805743	BMI_strict	TRUE	reported	HKLPXU	textfile	2	1	TRUE
	rs11121210	T	C	T	C	-0.0111	-0.0312574	0.3445	0.368313	FALSE	FALSE	FALSE	ieu-b-5123	1	8708529	0.0192187	NA	0.103863	HNC_noukb	Head and neck cancer (excl. UKB)	Head and neck cancer (excl. UKB) || ||	TRUE	igd	NA	NA	NA	NA	NA	NA	NA	1	8708529	0.0017	2.365e-10	718632	BMI_strict	TRUE	reported	HKLPXU	textfile	2	1	TRUE
	rs11128021	A	G	A	G	-0.0181	-0.000105683	0.1615	0.145311	FALSE	FALSE	FALSE	ieu-b-5123	3	88139016	0.0261352	NA	0.996774	HNC_noukb	Head and neck cancer (excl. UKB)	Head and neck cancer (excl. UKB) || ||	TRUE	igd	NA	NA	NA	NA	NA	NA	NA	3	88139016	0.0024	1.634e-14	718699	BMI_strict	TRUE	reported	HKLPXU	textfile	2	1	TRUE
	rs11150911	A	C	A	C	0.0118	-0.0376215	0.2848	0.291632	FALSE	FALSE	FALSE	ieu-b-5123	18	73498528	0.0205813	NA	0.0675585	HNC_noukb	Head and neck cancer (excl. UKB)	Head and neck cancer (excl. UKB) || ||	TRUE	igd	NA	NA	NA	NA	NA	NA	NA	18	73498528	0.0018	3.718e-11	802197	BMI_strict	TRUE	reported	HKLPXU	textfile	2	1	TRUE
	rs11165643	T	C	T	C	0.0185	-0.016758	0.5796	0.585489	FALSE	FALSE	FALSE	ieu-b-5123	1	96924097	0.0186521	NA	0.368946	HNC_noukb	Head and neck cancer (excl. UKB)	Head and neck cancer (excl. UKB) || ||	TRUE	igd	NA	NA	NA	NA	NA	NA	NA	1	96924097	0.0016	4.493e-30	805410	BMI_strict	TRUE	reported	HKLPXU	textfile	2	1	TRUE
	rs11170468	A	C	A	C	0.013	0.000865919	0.7826	0.766773	FALSE	FALSE	FALSE	ieu-b-5123	12	39430048	0.0217788	NA	0.968285	HNC_noukb	Head and neck cancer (excl. UKB)	Head and neck cancer (excl. UKB) || ||	TRUE	igd	NA	NA	NA	NA	NA	NA	NA	12	39430048	0.0019	1.124e-11	806636	BMI_strict	TRUE	reported	HKLPXU	textfile	2	1	TRUE
	rs11218510	A	G	A	G	-0.014	0.0477191	0.3949	0.398293	FALSE	FALSE	FALSE	ieu-b-5123	11	121922587	0.0189102	NA	0.0116204	HNC_noukb	Head and neck cancer (excl. UKB)	Head and neck cancer (excl. UKB) || ||	TRUE	igd	NA	NA	NA	NA	NA	NA	NA	11	121922587	0.002	6.788e-13	484680	BMI_strict	TRUE	reported	HKLPXU	textfile	2	1	TRUE
	rs112646560	T	C	T	C	0.018	0.0203488	0.2119	0.219856	FALSE	FALSE	FALSE	ieu-b-5123	1	39560250	0.0224843	NA	0.365454	HNC_noukb	Head and neck cancer (excl. UKB)	Head and neck cancer (excl. UKB) || ||	TRUE	igd	NA	NA	NA	NA	NA	NA	NA	1	39560250	0.0023	1.29e-14	484680	BMI_strict	TRUE	reported	HKLPXU	textfile	2	1	TRUE
	rs1126930	C	G	C	G	0.0341	0.0609618	0.0339	0.0348926	FALSE	TRUE	FALSE	ieu-b-5123	12	49399132	0.0506082	NA	0.228364	HNC_noukb	Head and neck cancer (excl. UKB)	Head and neck cancer (excl. UKB) || ||	TRUE	igd	NA	NA	NA	NA	NA	NA	NA	12	49399132	0.0053	1.004e-10	484680	BMI_strict	TRUE	reported	HKLPXU	textfile	2	1	TRUE
	rs11525873	T	C	T	C	0.0232	-0.0356534	0.8995	0.904309	FALSE	FALSE	FALSE	ieu-b-5123	7	138817193	0.0314921	NA	0.257577	HNC_noukb	Head and neck cancer (excl. UKB)	Head and neck cancer (excl. UKB) || ||	TRUE	igd	NA	NA	NA	NA	NA	NA	NA	7	138817193	0.0032	2.977e-13	484680	BMI_strict	TRUE	reported	HKLPXU	textfile	2	1	TRUE
	rs11538	A	G	A	G	-0.0138	-0.00190002	0.8284	0.82355	FALSE	FALSE	FALSE	ieu-b-5123	22	18220831	0.0241248	NA	0.937225	HNC_noukb	Head and neck cancer (excl. UKB)	Head and neck cancer (excl. UKB) || ||	TRUE	igd	NA	NA	NA	NA	NA	NA	NA	22	18220831	0.0023	1.094e-09	718441	BMI_strict	TRUE	reported	HKLPXU	textfile	2	1	TRUE
	rs11577094	T	C	T	C	0.0186	-0.0412723	0.0791	0.0807823	FALSE	FALSE	FALSE	ieu-b-5123	1	38026600	0.0338925	NA	0.223323	HNC_noukb	Head and neck cancer (excl. UKB)	Head and neck cancer (excl. UKB) || ||	TRUE	igd	NA	NA	NA	NA	NA	NA	NA	1	38026600	0.003	3.275e-10	791496	BMI_strict	TRUE	reported	HKLPXU	textfile	2	1	TRUE
	rs1159692	A	C	A	C	0.0135	-0.0130816	0.4752	0.498185	FALSE	FALSE	FALSE	ieu-b-5123	5	63977815	0.0184774	NA	0.478958	HNC_noukb	Head and neck cancer (excl. UKB)	Head and neck cancer (excl. UKB) || ||	TRUE	igd	NA	NA	NA	NA	NA	NA	NA	5	63977815	0.0017	5.543e-15	717639	BMI_strict	TRUE	reported	HKLPXU	textfile	2	1	TRUE
	rs11611246	T	G	T	G	0.0223	0.102098	0.199	0.217187	FALSE	FALSE	FALSE	ieu-b-5123	12	939480	0.0225255	NA	5.8272e-06	HNC_noukb	Head and neck cancer (excl. UKB)	Head and neck cancer (excl. UKB) || ||	TRUE	igd	NA	NA	NA	NA	NA	NA	NA	12	939480	0.002	2.037e-28	793063	BMI_strict	TRUE	reported	HKLPXU	textfile	2	1	TRUE
	rs11614340	T	C	T	C	-0.0117	-0.0373016	0.7066	0.6914	FALSE	FALSE	FALSE	ieu-b-5123	12	133448391	0.0199495	NA	0.061512	HNC_noukb	Head and neck cancer (excl. UKB)	Head and neck cancer (excl. UKB) || ||	TRUE	igd	TRUE	rs11614340	rs77936594	C	T	A	G	12	133426483	0.0018	1.87e-10	718698	BMI_strict	TRUE	reported	HKLPXU	textfile	2	1	TRUE
	rs11615578	T	C	T	C	0.0117	0.00936113	0.2575	0.246238	FALSE	FALSE	FALSE	ieu-b-5123	12	121714935	0.0218854	NA	0.668844	HNC_noukb	Head and neck cancer (excl. UKB)	Head and neck cancer (excl. UKB) || ||	TRUE	igd	NA	NA	NA	NA	NA	NA	NA	12	121714935	0.002	3.036e-09	704912	BMI_strict	TRUE	reported	HKLPXU	textfile	2	1	TRUE
	rs11633626	A	C	A	C	-0.0157	-0.0162205	0.6313	0.624506	FALSE	FALSE	FALSE	ieu-b-5123	15	95271378	0.0192037	NA	0.398305	HNC_noukb	Head and neck cancer (excl. UKB)	Head and neck cancer (excl. UKB) || ||	TRUE	igd	NA	NA	NA	NA	NA	NA	NA	15	95271378	0.0018	7.272e-19	718669	BMI_strict	TRUE	reported	HKLPXU	textfile	2	1	TRUE
	rs11636611	T	C	T	C	0.0104	0.0233545	0.4981	0.496611	FALSE	FALSE	FALSE	ieu-b-5123	15	36391965	0.0185812	NA	0.208794	HNC_noukb	Head and neck cancer (excl. UKB)	Head and neck cancer (excl. UKB) || ||	TRUE	igd	NA	NA	NA	NA	NA	NA	NA	15	36391965	0.0017	8.853e-10	718657	BMI_strict	TRUE	reported	HKLPXU	textfile	2	1	TRUE
	rs116374395	A	G	A	G	0.0321	-0.0191715	0.0348	0.0361669	FALSE	FALSE	FALSE	ieu-b-5123	5	50723410	0.0491393	NA	0.696429	HNC_noukb	Head and neck cancer (excl. UKB)	Head and neck cancer (excl. UKB) || ||	TRUE	igd	NA	NA	NA	NA	NA	NA	NA	5	50723410	0.0052	7.047e-10	484680	BMI_strict	TRUE	reported	HKLPXU	textfile	2	1	TRUE
	rs11649864	A	G	A	G	0.0192	0.0362832	0.0859	0.0865032	FALSE	FALSE	FALSE	ieu-b-5123	17	56093061	0.0324447	NA	0.263435	HNC_noukb	Head and neck cancer (excl. UKB)	Head and neck cancer (excl. UKB) || ||	TRUE	igd	NA	NA	NA	NA	NA	NA	NA	17	56093061	0.003	2.524e-10	690306	BMI_strict	TRUE	reported	HKLPXU	textfile	2	1	TRUE
	rs11655587	T	C	T	C	-0.021	-0.0163504	0.3572	0.350804	FALSE	FALSE	FALSE	ieu-b-5123	17	47140794	0.0194783	NA	0.401236	HNC_noukb	Head and neck cancer (excl. UKB)	Head and neck cancer (excl. UKB) || ||	TRUE	igd	NA	NA	NA	NA	NA	NA	NA	17	47140794	0.002	6.874e-26	484680	BMI_strict	TRUE	reported	HKLPXU	textfile	2	1	TRUE
	rs11672660	T	C	T	C	-0.0338	-0.00480908	0.1871	0.204161	FALSE	FALSE	FALSE	ieu-b-5123	19	46180184	0.0228222	NA	0.833106	HNC_noukb	Head and neck cancer (excl. UKB)	Head and neck cancer (excl. UKB) || ||	TRUE	igd	NA	NA	NA	NA	NA	NA	NA	19	46180184	0.0021	6.831e-60	781854	BMI_strict	TRUE	reported	HKLPXU	textfile	2	1	TRUE
	rs11692326	T	C	T	C	0.0147	0.030616	0.2302	0.232211	FALSE	FALSE	FALSE	ieu-b-5123	2	208263279	0.0217238	NA	0.158738	HNC_noukb	Head and neck cancer (excl. UKB)	Head and neck cancer (excl. UKB) || ||	TRUE	igd	NA	NA	NA	NA	NA	NA	NA	2	208263279	0.0019	1.685e-14	801583	BMI_strict	TRUE	reported	HKLPXU	textfile	2	1	TRUE
	rs11695013	T	C	T	C	-0.0104	-0.0155504	0.632	0.640273	FALSE	FALSE	FALSE	ieu-b-5123	2	157057487	0.0192836	NA	0.420009	HNC_noukb	Head and neck cancer (excl. UKB)	Head and neck cancer (excl. UKB) || ||	TRUE	igd	NA	NA	NA	NA	NA	NA	NA	2	157057487	0.0017	2.427e-09	718650	BMI_strict	TRUE	reported	HKLPXU	textfile	2	1	TRUE
	rs11713193	A	G	A	G	0.0246	0.0471748	0.5156	0.519634	FALSE	FALSE	FALSE	ieu-b-5123	3	49924424	0.0184342	NA	0.0104945	HNC_noukb	Head and neck cancer (excl. UKB)	Head and neck cancer (excl. UKB) || ||	TRUE	igd	NA	NA	NA	NA	NA	NA	NA	3	49924424	0.0017	3.02e-48	718286	BMI_strict	TRUE	reported	HKLPXU	textfile	2	1	TRUE
	rs11739877	T	C	T	C	0.0116	0.0182235	0.6231	0.616216	FALSE	FALSE	FALSE	ieu-b-5123	5	105876806	0.0188802	NA	0.334437	HNC_noukb	Head and neck cancer (excl. UKB)	Head and neck cancer (excl. UKB) || ||	TRUE	igd	NA	NA	NA	NA	NA	NA	NA	5	105876806	0.0018	4.006e-11	718632	BMI_strict	TRUE	reported	HKLPXU	textfile	2	1	TRUE
	rs11757278	T	C	T	C	0.0133	-0.0102018	0.6961	0.690847	FALSE	FALSE	FALSE	ieu-b-5123	6	13180454	0.0199975	NA	0.609944	HNC_noukb	Head and neck cancer (excl. UKB)	Head and neck cancer (excl. UKB) || ||	TRUE	igd	NA	NA	NA	NA	NA	NA	NA	6	13180454	0.0019	6.916e-13	718346	BMI_strict	TRUE	reported	HKLPXU	textfile	2	1	TRUE
	rs11772246	T	C	T	C	0.0145	0.0374564	0.8234	0.815806	FALSE	FALSE	FALSE	ieu-b-5123	7	71603692	0.0237347	NA	0.114536	HNC_noukb	Head and neck cancer (excl. UKB)	Head and neck cancer (excl. UKB) || ||	TRUE	igd	NA	NA	NA	NA	NA	NA	NA	7	71603692	0.0022	3.689e-11	718345	BMI_strict	TRUE	reported	HKLPXU	textfile	2	1	TRUE
	rs11782074	T	G	T	G	0.0124	-0.0132055	0.3675	0.377102	FALSE	FALSE	FALSE	ieu-b-5123	8	142617096	0.0194742	NA	0.497706	HNC_noukb	Head and neck cancer (excl. UKB)	Head and neck cancer (excl. UKB) || ||	TRUE	igd	NA	NA	NA	NA	NA	NA	NA	8	142617096	0.0018	4.238e-12	717837	BMI_strict	TRUE	reported	HKLPXU	textfile	2	1	TRUE
	rs118081010	T	C	T	C	0.0518	-0.0811299	0.0165	0.0142065	FALSE	FALSE	FALSE	ieu-b-5123	11	46174948	0.0790248	NA	0.304591	HNC_noukb	Head and neck cancer (excl. UKB)	Head and neck cancer (excl. UKB) || ||	TRUE	igd	NA	NA	NA	NA	NA	NA	NA	11	46174948	0.0075	5.277e-12	484680	BMI_strict	TRUE	reported	HKLPXU	textfile	2	1	TRUE
	rs11882409	A	C	A	C	0.0121	0.00969251	0.303	0.285753	FALSE	FALSE	FALSE	ieu-b-5123	19	34019685	0.0205103	NA	0.636521	HNC_noukb	Head and neck cancer (excl. UKB)	Head and neck cancer (excl. UKB) || ||	TRUE	igd	NA	NA	NA	NA	NA	NA	NA	19	34019685	0.0019	3.309e-10	718526	BMI_strict	TRUE	reported	HKLPXU	textfile	2	1	TRUE
	rs11902450	T	C	T	C	0.0167	-0.00812539	0.1052	0.104248	FALSE	FALSE	FALSE	ieu-b-5123	2	12845368	0.0301111	NA	0.787278	HNC_noukb	Head and neck cancer (excl. UKB)	Head and neck cancer (excl. UKB) || ||	TRUE	igd	NA	NA	NA	NA	NA	NA	NA	2	12845368	0.0027	1.061e-09	718624	BMI_strict	TRUE	reported	HKLPXU	textfile	2	1	TRUE
	rs11915371	A	C	A	C	-0.0154	0.0434602	0.8019	0.793385	FALSE	FALSE	FALSE	ieu-b-5123	3	70539559	0.022938	NA	0.058134	HNC_noukb	Head and neck cancer (excl. UKB)	Head and neck cancer (excl. UKB) || ||	TRUE	igd	NA	NA	NA	NA	NA	NA	NA	3	70539559	0.0021	2.288e-13	718311	BMI_strict	TRUE	reported	HKLPXU	textfile	2	1	TRUE
	rs11921432	T	C	T	C	-0.0189	-0.00861194	0.8906	0.888488	FALSE	FALSE	FALSE	ieu-b-5123	3	35117776	0.0292659	NA	0.768555	HNC_noukb	Head and neck cancer (excl. UKB)	Head and neck cancer (excl. UKB) || ||	TRUE	igd	NA	NA	NA	NA	NA	NA	NA	3	35117776	0.0027	5.382e-12	706646	BMI_strict	TRUE	reported	HKLPXU	textfile	2	1	TRUE
	rs12072739	A	G	A	G	-0.0169	-0.0372622	0.7762	0.774189	FALSE	FALSE	FALSE	ieu-b-5123	1	98315893	0.0220019	NA	0.0903441	HNC_noukb	Head and neck cancer (excl. UKB)	Head and neck cancer (excl. UKB) || ||	TRUE	igd	NA	NA	NA	NA	NA	NA	NA	1	98315893	0.0023	1.502e-13	484680	BMI_strict	TRUE	reported	HKLPXU	textfile	2	1	TRUE
	rs12098284	T	C	T	C	0.0184	-0.0114088	0.1212	0.126713	FALSE	FALSE	FALSE	ieu-b-5123	10	76047464	0.0278804	NA	0.682387	HNC_noukb	Head and neck cancer (excl. UKB)	Head and neck cancer (excl. UKB) || ||	TRUE	igd	NA	NA	NA	NA	NA	NA	NA	10	76047464	0.0026	9.868e-13	714745	BMI_strict	TRUE	reported	HKLPXU	textfile	2	1	TRUE
	rs12140153	T	G	T	G	-0.0353	0.0706404	0.0911	0.0950141	FALSE	FALSE	FALSE	ieu-b-5123	1	62579891	0.0315952	NA	0.0253653	HNC_noukb	Head and neck cancer (excl. UKB)	Head and neck cancer (excl. UKB) || ||	TRUE	igd	NA	NA	NA	NA	NA	NA	NA	1	62579891	0.0034	1.443e-25	484680	BMI_strict	TRUE	reported	HKLPXU	textfile	2	1	TRUE
	rs12150665	T	C	T	C	0.0168	-0.00169532	0.5931	0.592987	FALSE	FALSE	FALSE	ieu-b-5123	17	34914787	0.0188646	NA	0.928392	HNC_noukb	Head and neck cancer (excl. UKB)	Head and neck cancer (excl. UKB) || ||	TRUE	igd	NA	NA	NA	NA	NA	NA	NA	17	34914787	0.0016	1.737e-24	806685	BMI_strict	TRUE	reported	HKLPXU	textfile	2	1	TRUE
	rs12259464	A	G	A	G	0.0109	-0.0195103	0.4811	0.477823	FALSE	FALSE	FALSE	ieu-b-5123	10	53680099	0.018504	NA	0.291707	HNC_noukb	Head and neck cancer (excl. UKB)	Head and neck cancer (excl. UKB) || ||	TRUE	igd	NA	NA	NA	NA	NA	NA	NA	10	53680099	0.0017	1.478e-10	716686	BMI_strict	TRUE	reported	HKLPXU	textfile	2	1	TRUE
	rs12282785	A	C	A	C	-0.0157	-0.061269	0.2204	0.217244	FALSE	FALSE	FALSE	ieu-b-5123	11	76476030	0.0225811	NA	0.00666193	HNC_noukb	Head and neck cancer (excl. UKB)	Head and neck cancer (excl. UKB) || ||	TRUE	igd	NA	NA	NA	NA	NA	NA	NA	11	76476030	0.0023	1.434e-11	484680	BMI_strict	TRUE	reported	HKLPXU	textfile	2	1	TRUE
	rs12286929	A	G	A	G	-0.0177	-0.061493	0.5007	0.463813	FALSE	FALSE	FALSE	ieu-b-5123	11	115022404	0.01849	NA	0.0008818	HNC_noukb	Head and neck cancer (excl. UKB)	Head and neck cancer (excl. UKB) || ||	TRUE	igd	NA	NA	NA	NA	NA	NA	NA	11	115022404	0.0016	1.925e-27	806583	BMI_strict	TRUE	reported	HKLPXU	textfile	2	1	TRUE
	rs12334877	A	G	A	G	-0.0144	0.00474466	0.1913	0.199731	FALSE	FALSE	FALSE	ieu-b-5123	8	67194171	0.0232234	NA	0.838115	HNC_noukb	Head and neck cancer (excl. UKB)	Head and neck cancer (excl. UKB) || ||	TRUE	igd	NA	NA	NA	NA	NA	NA	NA	8	67194171	0.0021	2.173e-11	717934	BMI_strict	TRUE	reported	HKLPXU	textfile	2	1	TRUE
	rs12364470	T	G	T	G	-0.0187	0.00496585	0.8535	0.835547	FALSE	FALSE	FALSE	ieu-b-5123	11	134601012	0.0251117	NA	0.843241	HNC_noukb	Head and neck cancer (excl. UKB)	Head and neck cancer (excl. UKB) || ||	TRUE	igd	NA	NA	NA	NA	NA	NA	NA	11	134601012	0.0022	2.18e-17	799515	BMI_strict	TRUE	reported	HKLPXU	textfile	2	1	TRUE
	rs12369179	T	C	T	C	-0.034	0.00386369	0.085	0.0933573	FALSE	FALSE	FALSE	ieu-b-5123	12	122963550	0.03197	NA	0.903807	HNC_noukb	Head and neck cancer (excl. UKB)	Head and neck cancer (excl. UKB) || ||	TRUE	igd	NA	NA	NA	NA	NA	NA	NA	12	122963550	0.0031	2.324e-28	703003	BMI_strict	TRUE	reported	HKLPXU	textfile	2	1	TRUE
	rs12421848	A	G	A	G	-0.0141	0.0148306	0.3962	0.380872	FALSE	FALSE	FALSE	ieu-b-5123	11	892089	0.0191772	NA	0.439318	HNC_noukb	Head and neck cancer (excl. UKB)	Head and neck cancer (excl. UKB) || ||	TRUE	igd	TRUE	rs12421848	rs7952102	A	G	C	T	11	891338	0.0019	3.993e-13	484680	BMI_strict	TRUE	reported	HKLPXU	textfile	2	1	TRUE
	rs12429545	A	G	A	G	0.0313	0.0344554	0.1218	0.125669	FALSE	FALSE	FALSE	ieu-b-5123	13	54102206	0.0276696	NA	0.213041	HNC_noukb	Head and neck cancer (excl. UKB)	Head and neck cancer (excl. UKB) || ||	TRUE	igd	NA	NA	NA	NA	NA	NA	NA	13	54102206	0.0024	1.419e-37	797614	BMI_strict	TRUE	reported	HKLPXU	textfile	2	1	TRUE
	rs12439632	C	G	C	G	0.0145	0.0133082	0.1682	0.151676	FALSE	TRUE	FALSE	ieu-b-5123	15	59103963	0.0257836	NA	0.605749	HNC_noukb	Head and neck cancer (excl. UKB)	Head and neck cancer (excl. UKB) || ||	TRUE	igd	NA	NA	NA	NA	NA	NA	NA	15	59103963	0.0023	3.675e-10	718615	BMI_strict	TRUE	reported	HKLPXU	textfile	2	1	TRUE
	rs12448257	A	G	A	G	0.0161	0.0162807	0.2185	0.210353	FALSE	FALSE	FALSE	ieu-b-5123	16	3599655	0.0228274	NA	0.475716	HNC_noukb	Head and neck cancer (excl. UKB)	Head and neck cancer (excl. UKB) || ||	TRUE	igd	NA	NA	NA	NA	NA	NA	NA	16	3599655	0.002	9.035e-16	797946	BMI_strict	TRUE	reported	HKLPXU	textfile	2	1	TRUE
	rs12462975	A	G	A	G	0.0193	-0.0203774	0.3243	0.319304	FALSE	FALSE	FALSE	ieu-b-5123	19	30277729	0.0198683	NA	0.30507	HNC_noukb	Head and neck cancer (excl. UKB)	Head and neck cancer (excl. UKB) || ||	TRUE	igd	TRUE	rs12462975	rs113701136	A	G	T	C	19	30272202	0.0018	1.474e-25	717340	BMI_strict	TRUE	reported	HKLPXU	textfile	2	1	TRUE
	rs12527426	A	G	A	G	0.015	-0.0164454	0.3	0.290177	FALSE	FALSE	FALSE	ieu-b-5123	6	153392908	0.0201517	NA	0.414455	HNC_noukb	Head and neck cancer (excl. UKB)	Head and neck cancer (excl. UKB) || ||	TRUE	igd	TRUE	rs12527426	rs9478384	A	G	C	T	6	153392002	0.0019	5.544e-16	717888	BMI_strict	TRUE	reported	HKLPXU	textfile	2	1	TRUE
	rs12594043	C	G	C	G	0.0102	-0.0412723	0.5205	0.515568	FALSE	TRUE	TRUE	ieu-b-5123	15	27034988	0.0185808	NA	0.0263348	HNC_noukb	Head and neck cancer (excl. UKB)	Head and neck cancer (excl. UKB) || ||	TRUE	igd	NA	NA	NA	NA	NA	NA	NA	15	27034988	0.0017	1.312e-09	718508	BMI_strict	TRUE	reported	HKLPXU	textfile	2	1	FALSE
	rs12602912	T	C	T	C	0.0166	0.00449713	0.212	0.198439	FALSE	FALSE	FALSE	ieu-b-5123	17	65870073	0.0231212	NA	0.845783	HNC_noukb	Head and neck cancer (excl. UKB)	Head and neck cancer (excl. UKB) || ||	TRUE	igd	NA	NA	NA	NA	NA	NA	NA	17	65870073	0.002	2.899e-16	788746	BMI_strict	TRUE	reported	HKLPXU	textfile	2	1	TRUE
	rs12628051	T	C	T	C	0.0161	-0.00238948	0.6407	0.655254	FALSE	FALSE	FALSE	ieu-b-5123	22	40654276	0.0193261	NA	0.901601	HNC_noukb	Head and neck cancer (excl. UKB)	Head and neck cancer (excl. UKB) || ||	TRUE	igd	NA	NA	NA	NA	NA	NA	NA	22	40654276	0.0018	2.9e-19	715009	BMI_strict	TRUE	reported	HKLPXU	textfile	2	1	TRUE
	rs12628891	T	C	T	C	-0.0115	-0.015711	0.3186	0.318082	FALSE	FALSE	FALSE	ieu-b-5123	22	38317137	0.0198889	NA	0.429565	HNC_noukb	Head and neck cancer (excl. UKB)	Head and neck cancer (excl. UKB) || ||	TRUE	igd	NA	NA	NA	NA	NA	NA	NA	22	38317137	0.0019	5.852e-10	718155	BMI_strict	TRUE	reported	HKLPXU	textfile	2	1	TRUE
	rs12635553	A	T	A	T	0.0099	0.00492556	0.486	0.494632	FALSE	TRUE	TRUE	ieu-b-5123	3	171116603	0.0187258	NA	0.792523	HNC_noukb	Head and neck cancer (excl. UKB)	Head and neck cancer (excl. UKB) || ||	TRUE	igd	TRUE	rs12635553	rs10936682	T	A	G	A	3	171113714	0.0017	4.102e-09	714859	BMI_strict	TRUE	reported	HKLPXU	textfile	2	1	FALSE
	rs12636480	T	G	T	G	0.0128	0.0170588	0.3507	0.359934	FALSE	FALSE	FALSE	ieu-b-5123	3	82719412	0.0191882	NA	0.373991	HNC_noukb	Head and neck cancer (excl. UKB)	Head and neck cancer (excl. UKB) || ||	TRUE	igd	NA	NA	NA	NA	NA	NA	NA	3	82719412	0.0018	6.96e-13	718231	BMI_strict	TRUE	reported	HKLPXU	textfile	2	1	TRUE
	rs12652212	A	G	A	G	-0.0131	-0.0163453	0.5611	0.573699	FALSE	FALSE	FALSE	ieu-b-5123	5	88808594	0.0186004	NA	0.379532	HNC_noukb	Head and neck cancer (excl. UKB)	Head and neck cancer (excl. UKB) || ||	TRUE	igd	NA	NA	NA	NA	NA	NA	NA	5	88808594	0.0016	1.633e-15	806515	BMI_strict	TRUE	reported	HKLPXU	textfile	2	1	TRUE
	rs1268065	A	G	A	G	-0.01	0.019577	0.5	0.476632	FALSE	FALSE	FALSE	ieu-b-5123	6	126042783	0.018469	NA	0.289148	HNC_noukb	Head and neck cancer (excl. UKB)	Head and neck cancer (excl. UKB) || ||	TRUE	igd	NA	NA	NA	NA	NA	NA	NA	6	126042783	0.0016	7.119e-10	786277	BMI_strict	TRUE	reported	HKLPXU	textfile	2	1	TRUE
	rs12680842	A	G	A	G	0.0142	0.00481955	0.6839	0.678672	FALSE	FALSE	FALSE	ieu-b-5123	8	95582606	0.0196343	NA	0.806096	HNC_noukb	Head and neck cancer (excl. UKB)	Head and neck cancer (excl. UKB) || ||	TRUE	igd	NA	NA	NA	NA	NA	NA	NA	8	95582606	0.0017	3.411e-16	800300	BMI_strict	TRUE	reported	HKLPXU	textfile	2	1	TRUE
	rs12681792	A	C	A	C	0.015	-0.00640518	0.2024	0.1946	FALSE	FALSE	FALSE	ieu-b-5123	8	62054463	0.0234365	NA	0.784623	HNC_noukb	Head and neck cancer (excl. UKB)	Head and neck cancer (excl. UKB) || ||	TRUE	igd	NA	NA	NA	NA	NA	NA	NA	8	62054463	0.0021	2.883e-12	717806	BMI_strict	TRUE	reported	HKLPXU	textfile	2	1	TRUE
	rs12692596	T	C	T	C	0.012	0.00179042	0.3618	0.371301	FALSE	FALSE	FALSE	ieu-b-5123	2	161265910	0.0189716	NA	0.924812	HNC_noukb	Head and neck cancer (excl. UKB)	Head and neck cancer (excl. UKB) || ||	TRUE	igd	NA	NA	NA	NA	NA	NA	NA	2	161265910	0.0017	1.032e-12	806739	BMI_strict	TRUE	reported	HKLPXU	textfile	2	1	TRUE
	rs12714199	T	C	T	C	-0.0141	-0.0222875	0.6146	0.622505	FALSE	FALSE	FALSE	ieu-b-5123	2	86812549	0.019026	NA	0.241428	HNC_noukb	Head and neck cancer (excl. UKB)	Head and neck cancer (excl. UKB) || ||	TRUE	igd	NA	NA	NA	NA	NA	NA	NA	2	86812549	0.0017	3.219e-16	718671	BMI_strict	TRUE	reported	HKLPXU	textfile	2	1	TRUE
	rs12765914	T	C	T	C	0.0226	0.00760991	0.0801	0.0856343	FALSE	FALSE	FALSE	ieu-b-5123	10	34013507	0.0329646	NA	0.817431	HNC_noukb	Head and neck cancer (excl. UKB)	Head and neck cancer (excl. UKB) || ||	TRUE	igd	NA	NA	NA	NA	NA	NA	NA	10	34013507	0.0031	1.96e-13	718619	BMI_strict	TRUE	reported	HKLPXU	textfile	2	1	TRUE
	rs12868881	A	T	A	T	0.0138	-0.00549765	0.4066	0.419174	FALSE	TRUE	FALSE	ieu-b-5123	13	112218924	0.0188287	NA	0.7703	HNC_noukb	Head and neck cancer (excl. UKB)	Head and neck cancer (excl. UKB) || ||	TRUE	igd	NA	NA	NA	NA	NA	NA	NA	13	112218924	0.0017	1.401e-15	718650	BMI_strict	TRUE	reported	HKLPXU	textfile	2	1	TRUE
	rs12888545	A	G	A	G	-0.0133	0.0307048	0.7464	0.751846	FALSE	FALSE	FALSE	ieu-b-5123	14	88308044	0.021332	NA	0.150043	HNC_noukb	Head and neck cancer (excl. UKB)	Head and neck cancer (excl. UKB) || ||	TRUE	igd	NA	NA	NA	NA	NA	NA	NA	14	88308044	0.002	1.764e-11	718431	BMI_strict	TRUE	reported	HKLPXU	textfile	2	1	TRUE
	rs12914623	C	G	C	G	-0.0159	0.0369491	0.2722	0.261162	FALSE	TRUE	FALSE	ieu-b-5123	15	80993570	0.021016	NA	0.0787245	HNC_noukb	Head and neck cancer (excl. UKB)	Head and neck cancer (excl. UKB) || ||	TRUE	igd	NA	NA	NA	NA	NA	NA	NA	15	80993570	0.0019	1.999e-16	718054	BMI_strict	TRUE	reported	HKLPXU	textfile	2	1	TRUE
	rs12922346	C	G	C	G	0.0133	-0.0294573	0.2641	0.269443	FALSE	TRUE	FALSE	ieu-b-5123	16	82438337	0.020905	NA	0.158805	HNC_noukb	Head and neck cancer (excl. UKB)	Head and neck cancer (excl. UKB) || ||	TRUE	igd	NA	NA	NA	NA	NA	NA	NA	16	82438337	0.002	1.482e-11	716945	BMI_strict	TRUE	reported	HKLPXU	textfile	2	1	TRUE
	rs12926250	T	G	T	G	0.018	-0.028004	0.1051	0.0999445	FALSE	FALSE	FALSE	ieu-b-5123	16	72213316	0.0308136	NA	0.363445	HNC_noukb	Head and neck cancer (excl. UKB)	Head and neck cancer (excl. UKB) || ||	TRUE	igd	NA	NA	NA	NA	NA	NA	NA	16	72213316	0.0028	1.784e-10	718628	BMI_strict	TRUE	reported	HKLPXU	textfile	2	1	TRUE
	rs12939549	A	G	A	G	0.018	-0.025596	0.5572	0.559695	FALSE	FALSE	FALSE	ieu-b-5123	17	78611724	0.0184415	NA	0.165149	HNC_noukb	Head and neck cancer (excl. UKB)	Head and neck cancer (excl. UKB) || ||	TRUE	igd	NA	NA	NA	NA	NA	NA	NA	17	78611724	0.0016	3.681e-28	806064	BMI_strict	TRUE	reported	HKLPXU	textfile	2	1	TRUE
	rs1296328	A	C	A	C	0.0166	0.0113948	0.4464	0.449969	FALSE	FALSE	FALSE	ieu-b-5123	4	137083193	0.0186281	NA	0.540736	HNC_noukb	Head and neck cancer (excl. UKB)	Head and neck cancer (excl. UKB) || ||	TRUE	igd	NA	NA	NA	NA	NA	NA	NA	4	137083193	0.0017	3.486e-22	717741	BMI_strict	TRUE	reported	HKLPXU	textfile	2	1	TRUE
	rs12981256	A	G	A	G	0.0151	0.00545922	0.5284	0.524214	FALSE	FALSE	FALSE	ieu-b-5123	19	1865901	0.0192874	NA	0.777141	HNC_noukb	Head and neck cancer (excl. UKB)	Head and neck cancer (excl. UKB) || ||	TRUE	igd	NA	NA	NA	NA	NA	NA	NA	19	1865901	0.0017	1.432e-18	715373	BMI_strict	TRUE	reported	HKLPXU	textfile	2	1	TRUE
	rs12987009	A	T	A	T	-0.0109	-0.0296864	0.5851	0.566322	FALSE	TRUE	TRUE	ieu-b-5123	2	219658170	0.01874	NA	0.113167	HNC_noukb	Head and neck cancer (excl. UKB)	Head and neck cancer (excl. UKB) || ||	TRUE	igd	NA	NA	NA	NA	NA	NA	NA	2	219658170	0.0017	1.834e-10	717653	BMI_strict	TRUE	reported	HKLPXU	textfile	2	1	FALSE
	rs13021737	A	G	A	G	-0.0578	-0.0239137	0.1567	0.172386	FALSE	FALSE	FALSE	ieu-b-5123	2	632348	0.0245922	NA	0.330846	HNC_noukb	Head and neck cancer (excl. UKB)	Head and neck cancer (excl. UKB) || ||	TRUE	igd	NA	NA	NA	NA	NA	NA	NA	2	632348	0.0021	2.89e-161	802967	BMI_strict	TRUE	reported	HKLPXU	textfile	2	1	TRUE
	rs13033310	A	G	A	G	0.0146	-0.0200869	0.2519	0.251579	FALSE	FALSE	FALSE	ieu-b-5123	2	133523605	0.0211279	NA	0.341741	HNC_noukb	Head and neck cancer (excl. UKB)	Head and neck cancer (excl. UKB) || ||	TRUE	igd	NA	NA	NA	NA	NA	NA	NA	2	133523605	0.0022	3.395e-11	484680	BMI_strict	TRUE	reported	HKLPXU	textfile	2	1	TRUE
	rs13047416	C	G	C	G	0.0152	0.000767627	0.6263	0.621885	FALSE	TRUE	FALSE	ieu-b-5123	21	40309436	0.0190831	NA	0.967913	HNC_noukb	Head and neck cancer (excl. UKB)	Head and neck cancer (excl. UKB) || ||	TRUE	igd	NA	NA	NA	NA	NA	NA	NA	21	40309436	0.0018	6.934e-18	717914	BMI_strict	TRUE	reported	HKLPXU	textfile	2	1	TRUE
	rs13107325	T	C	T	C	0.0468	-0.0760244	0.082	0.0751201	FALSE	FALSE	FALSE	ieu-b-5123	4	103188709	0.0351444	NA	0.030526	HNC_noukb	Head and neck cancer (excl. UKB)	Head and neck cancer (excl. UKB) || ||	TRUE	igd	NA	NA	NA	NA	NA	NA	NA	4	103188709	0.0032	3.805e-47	806141	BMI_strict	TRUE	reported	HKLPXU	textfile	2	1	TRUE
	rs13110266	A	G	A	G	-0.0124	0.0029259	0.4037	0.406364	FALSE	FALSE	FALSE	ieu-b-5123	4	162129844	0.0189145	NA	0.877065	HNC_noukb	Head and neck cancer (excl. UKB)	Head and neck cancer (excl. UKB) || ||	TRUE	igd	NA	NA	NA	NA	NA	NA	NA	4	162129844	0.0016	3.956e-14	806749	BMI_strict	TRUE	reported	HKLPXU	textfile	2	1	TRUE
	rs13174863	A	G	A	G	-0.0197	-0.0134348	0.8542	0.849886	FALSE	FALSE	FALSE	ieu-b-5123	5	139080745	0.0259585	NA	0.604774	HNC_noukb	Head and neck cancer (excl. UKB)	Head and neck cancer (excl. UKB) || ||	TRUE	igd	NA	NA	NA	NA	NA	NA	NA	5	139080745	0.0023	1.939e-17	793550	BMI_strict	TRUE	reported	HKLPXU	textfile	2	1	TRUE
	rs13186194	T	C	T	C	0.01	-0.00399079	0.6169	0.62448	FALSE	FALSE	FALSE	ieu-b-5123	5	60795485	0.0191318	NA	0.834765	HNC_noukb	Head and neck cancer (excl. UKB)	Head and neck cancer (excl. UKB) || ||	TRUE	igd	NA	NA	NA	NA	NA	NA	NA	5	60795485	0.0017	2.197e-09	806614	BMI_strict	TRUE	reported	HKLPXU	textfile	2	1	TRUE
	rs13191362	A	G	A	G	0.0235	0.0543903	0.8572	0.876985	FALSE	FALSE	FALSE	ieu-b-5123	6	163033350	0.0281299	NA	0.0531692	HNC_noukb	Head and neck cancer (excl. UKB)	Head and neck cancer (excl. UKB) || ||	TRUE	igd	NA	NA	NA	NA	NA	NA	NA	6	163033350	0.0025	4.079e-21	806582	BMI_strict	TRUE	reported	HKLPXU	textfile	2	1	TRUE
	rs13240600	A	G	A	G	0.018	0.0617536	0.8343	0.846032	FALSE	FALSE	FALSE	ieu-b-5123	7	99064466	0.0256425	NA	0.0160288	HNC_noukb	Head and neck cancer (excl. UKB)	Head and neck cancer (excl. UKB) || ||	TRUE	igd	NA	NA	NA	NA	NA	NA	NA	7	99064466	0.0022	7.904e-16	718601	BMI_strict	TRUE	reported	HKLPXU	textfile	2	1	TRUE
	rs13245051	A	G	A	G	0.015	0.0224751	0.4557	0.44952	FALSE	FALSE	FALSE	ieu-b-5123	7	113362799	0.0187154	NA	0.229796	HNC_noukb	Head and neck cancer (excl. UKB)	Head and neck cancer (excl. UKB) || ||	TRUE	igd	NA	NA	NA	NA	NA	NA	NA	7	113362799	0.0017	1.121e-18	714046	BMI_strict	TRUE	reported	HKLPXU	textfile	2	1	TRUE
	rs13263601	A	C	A	C	-0.0145	0.0462923	0.6585	0.649565	FALSE	FALSE	FALSE	ieu-b-5123	8	14095900	0.0192622	NA	0.0162495	HNC_noukb	Head and neck cancer (excl. UKB)	Head and neck cancer (excl. UKB) || ||	TRUE	igd	NA	NA	NA	NA	NA	NA	NA	8	14095900	0.0018	4.867e-16	714980	BMI_strict	TRUE	reported	HKLPXU	textfile	2	1	TRUE
	rs1327259	A	G	A	G	0.0157	-0.0154417	0.6096	0.610857	FALSE	FALSE	FALSE	ieu-b-5123	6	51177811	0.0188778	NA	0.413368	HNC_noukb	Head and neck cancer (excl. UKB)	Head and neck cancer (excl. UKB) || ||	TRUE	igd	NA	NA	NA	NA	NA	NA	NA	6	51177811	0.0017	1.465e-19	718295	BMI_strict	TRUE	reported	HKLPXU	textfile	2	1	TRUE
	rs13296413	T	C	T	C	-0.0148	0.0506968	0.3811	0.371332	FALSE	FALSE	FALSE	ieu-b-5123	9	37258105	0.019061	NA	0.00782078	HNC_noukb	Head and neck cancer (excl. UKB)	Head and neck cancer (excl. UKB) || ||	TRUE	igd	NA	NA	NA	NA	NA	NA	NA	9	37258105	0.0017	2.49e-17	718610	BMI_strict	TRUE	reported	HKLPXU	textfile	2	1	TRUE
	rs1346841	A	G	A	G	-0.0126	0.0172974	0.4116	0.401257	FALSE	FALSE	FALSE	ieu-b-5123	4	65651730	0.0186796	NA	0.354441	HNC_noukb	Head and neck cancer (excl. UKB)	Head and neck cancer (excl. UKB) || ||	TRUE	igd	NA	NA	NA	NA	NA	NA	NA	4	65651730	0.0017	3.183e-13	718293	BMI_strict	TRUE	reported	HKLPXU	textfile	2	1	TRUE
	rs1350430	T	C	T	C	-0.0125	0.0313978	0.5328	0.543705	FALSE	FALSE	FALSE	ieu-b-5123	12	41819215	0.0184416	NA	0.0886523	HNC_noukb	Head and neck cancer (excl. UKB)	Head and neck cancer (excl. UKB) || ||	TRUE	igd	NA	NA	NA	NA	NA	NA	NA	12	41819215	0.0017	2.075e-13	718510	BMI_strict	TRUE	reported	HKLPXU	textfile	2	1	TRUE
	rs1356506	T	C	T	C	0.0137	-0.029774	0.6287	0.628603	FALSE	FALSE	FALSE	ieu-b-5123	18	40708038	0.0190605	NA	0.11827	HNC_noukb	Head and neck cancer (excl. UKB)	Head and neck cancer (excl. UKB) || ||	TRUE	igd	NA	NA	NA	NA	NA	NA	NA	18	40708038	0.0018	8.394e-15	718632	BMI_strict	TRUE	reported	HKLPXU	textfile	2	1	TRUE
	rs1358980	T	C	T	C	-0.0129	-0.00186299	0.4735	0.474364	FALSE	FALSE	FALSE	ieu-b-5123	6	43764551	0.0185718	NA	0.920096	HNC_noukb	Head and neck cancer (excl. UKB)	Head and neck cancer (excl. UKB) || ||	TRUE	igd	NA	NA	NA	NA	NA	NA	NA	6	43764551	0.0017	5.151e-15	797930	BMI_strict	TRUE	reported	HKLPXU	textfile	2	1	TRUE
	rs1383592	A	G	A	G	0.0122	0.00483201	0.212	0.203705	FALSE	FALSE	FALSE	ieu-b-5123	8	106430676	0.022747	NA	0.831777	HNC_noukb	Head and neck cancer (excl. UKB)	Head and neck cancer (excl. UKB) || ||	TRUE	igd	NA	NA	NA	NA	NA	NA	NA	8	106430676	0.0021	4.92e-09	718467	BMI_strict	TRUE	reported	HKLPXU	textfile	2	1	TRUE
	rs1409818	T	C	T	C	0.0195	-0.0304723	0.1074	0.102916	FALSE	FALSE	FALSE	ieu-b-5123	20	21381121	0.0302315	NA	0.31347	HNC_noukb	Head and neck cancer (excl. UKB)	Head and neck cancer (excl. UKB) || ||	TRUE	igd	NA	NA	NA	NA	NA	NA	NA	20	21381121	0.0028	2.589e-12	718603	BMI_strict	TRUE	reported	HKLPXU	textfile	2	1	TRUE
	rs1412235	C	G	C	G	0.0237	0.00771305	0.3151	0.318211	FALSE	TRUE	FALSE	ieu-b-5123	9	28410996	0.0199198	NA	0.698604	HNC_noukb	Head and neck cancer (excl. UKB)	Head and neck cancer (excl. UKB) || ||	TRUE	igd	NA	NA	NA	NA	NA	NA	NA	9	28410996	0.0017	2.277e-42	804074	BMI_strict	TRUE	reported	HKLPXU	textfile	2	1	TRUE
	rs1421334	A	C	A	C	0.0135	0.0122329	0.4546	0.459912	FALSE	FALSE	FALSE	ieu-b-5123	8	30865733	0.0186764	NA	0.512471	HNC_noukb	Head and neck cancer (excl. UKB)	Head and neck cancer (excl. UKB) || ||	TRUE	igd	NA	NA	NA	NA	NA	NA	NA	8	30865733	0.0017	3.111e-15	717941	BMI_strict	TRUE	reported	HKLPXU	textfile	2	1	TRUE
	rs1436344	C	G	C	G	0.0147	-0.00679729	0.5703	0.587208	FALSE	TRUE	TRUE	ieu-b-5123	3	104606144	0.0188679	NA	0.718654	HNC_noukb	Head and neck cancer (excl. UKB)	Head and neck cancer (excl. UKB) || ||	TRUE	igd	NA	NA	NA	NA	NA	NA	NA	3	104606144	0.0017	1.07e-17	718660	BMI_strict	TRUE	reported	HKLPXU	textfile	2	1	FALSE
	rs1437842	A	G	A	G	-0.0106	0.0142223	0.4907	0.482553	FALSE	FALSE	FALSE	ieu-b-5123	4	173597016	0.018477	NA	0.441461	HNC_noukb	Head and neck cancer (excl. UKB)	Head and neck cancer (excl. UKB) || ||	TRUE	igd	NA	NA	NA	NA	NA	NA	NA	4	173597016	0.0017	8.494e-10	705988	BMI_strict	TRUE	reported	HKLPXU	textfile	2	1	TRUE
	rs1441264	A	G	A	G	0.0174	0.016716	0.5846	0.596029	FALSE	FALSE	FALSE	ieu-b-5123	13	79580919	0.0187828	NA	0.373488	HNC_noukb	Head and neck cancer (excl. UKB)	Head and neck cancer (excl. UKB) || ||	TRUE	igd	NA	NA	NA	NA	NA	NA	NA	13	79580919	0.0017	7.603e-25	794966	BMI_strict	TRUE	reported	HKLPXU	textfile	2	1	TRUE
	rs1451077	A	G	A	G	-0.0169	0.0112948	0.5776	0.5755	FALSE	FALSE	FALSE	ieu-b-5123	2	147901207	0.0188303	NA	0.548626	HNC_noukb	Head and neck cancer (excl. UKB)	Head and neck cancer (excl. UKB) || ||	TRUE	igd	NA	NA	NA	NA	NA	NA	NA	2	147901207	0.0019	1.426e-18	484680	BMI_strict	TRUE	reported	HKLPXU	textfile	2	1	TRUE
	rs147568678	T	C	T	C	0.0134	0.0100249	0.7684	0.76675	FALSE	FALSE	FALSE	ieu-b-5123	10	93061851	0.0221749	NA	0.651208	HNC_noukb	Head and neck cancer (excl. UKB)	Head and neck cancer (excl. UKB) || ||	TRUE	igd	NA	NA	NA	NA	NA	NA	NA	10	93061851	0.0023	3.422e-09	484680	BMI_strict	TRUE	reported	HKLPXU	textfile	2	1	TRUE
	rs1477199	A	G	A	G	-0.0221	0.0433901	0.8426	0.85906	FALSE	FALSE	FALSE	ieu-b-5123	16	53712135	0.0265131	NA	0.101724	HNC_noukb	Head and neck cancer (excl. UKB)	Head and neck cancer (excl. UKB) || ||	TRUE	igd	NA	NA	NA	NA	NA	NA	NA	16	53712135	0.0023	5.145e-21	806707	BMI_strict	TRUE	reported	HKLPXU	textfile	2	1	TRUE
	rs1492014	T	C	T	C	-0.0171	-0.0134719	0.5674	0.577971	FALSE	FALSE	FALSE	ieu-b-5123	3	94071481	0.0187122	NA	0.471554	HNC_noukb	Head and neck cancer (excl. UKB)	Head and neck cancer (excl. UKB) || ||	TRUE	igd	NA	NA	NA	NA	NA	NA	NA	3	94071481	0.0017	1.442e-23	718371	BMI_strict	TRUE	reported	HKLPXU	textfile	2	1	TRUE
	rs1492767	T	C	T	C	0.0095	0.00742222	0.4681	0.498656	FALSE	FALSE	FALSE	ieu-b-5123	4	55221467	0.0185649	NA	0.689304	HNC_noukb	Head and neck cancer (excl. UKB)	Head and neck cancer (excl. UKB) || ||	TRUE	igd	NA	NA	NA	NA	NA	NA	NA	4	55221467	0.0016	3.546e-09	806046	BMI_strict	TRUE	reported	HKLPXU	textfile	2	1	TRUE
	rs1501673	A	G	A	G	0.0289	0.00148213	0.1355	0.134386	FALSE	FALSE	FALSE	ieu-b-5123	5	87963600	0.0269751	NA	0.956183	HNC_noukb	Head and neck cancer (excl. UKB)	Head and neck cancer (excl. UKB) || ||	TRUE	igd	NA	NA	NA	NA	NA	NA	NA	5	87963600	0.0025	2.725e-31	718652	BMI_strict	TRUE	reported	HKLPXU	textfile	2	1	TRUE
	rs1522569	T	G	T	G	0.0141	-0.072267	0.8183	0.815014	FALSE	FALSE	FALSE	ieu-b-5123	4	171632637	0.0236923	NA	0.00228665	HNC_noukb	Head and neck cancer (excl. UKB)	Head and neck cancer (excl. UKB) || ||	TRUE	igd	NA	NA	NA	NA	NA	NA	NA	4	171632637	0.0022	1.599e-10	718485	BMI_strict	TRUE	reported	HKLPXU	textfile	2	1	TRUE
	rs1559673	A	C	A	C	0.0359	-0.0803382	0.9688	0.975278	FALSE	FALSE	FALSE	ieu-b-5123	15	62156514	0.0584086	NA	0.168992	HNC_noukb	Head and neck cancer (excl. UKB)	Head and neck cancer (excl. UKB) || ||	TRUE	igd	NA	NA	NA	NA	NA	NA	NA	15	62156514	0.0049	2.212e-13	791967	BMI_strict	TRUE	reported	HKLPXU	textfile	2	1	TRUE
	rs156201	C	G	C	G	0.0124	-0.0166395	0.7459	0.750121	FALSE	TRUE	FALSE	ieu-b-5123	6	104847441	0.0213636	NA	0.436056	HNC_noukb	Head and neck cancer (excl. UKB)	Head and neck cancer (excl. UKB) || ||	TRUE	igd	NA	NA	NA	NA	NA	NA	NA	6	104847441	0.0019	1.646e-10	718454	BMI_strict	TRUE	reported	HKLPXU	textfile	2	1	TRUE
	rs16851483	T	G	T	G	0.0352	0.0565725	0.0717	0.0649201	FALSE	FALSE	FALSE	ieu-b-5123	3	141275436	0.0373376	NA	0.129732	HNC_noukb	Head and neck cancer (excl. UKB)	Head and neck cancer (excl. UKB) || ||	TRUE	igd	NA	NA	NA	NA	NA	NA	NA	3	141275436	0.0034	4.869e-25	718609	BMI_strict	TRUE	reported	HKLPXU	textfile	2	1	TRUE
	rs16906838	T	C	T	C	-0.0247	-0.00141649	0.0486	0.0497213	FALSE	FALSE	FALSE	ieu-b-5123	8	138213836	0.0425552	NA	0.973447	HNC_noukb	Head and neck cancer (excl. UKB)	Head and neck cancer (excl. UKB) || ||	TRUE	igd	NA	NA	NA	NA	NA	NA	NA	8	138213836	0.004	4.305e-10	706788	BMI_strict	TRUE	reported	HKLPXU	textfile	2	1	TRUE
	rs17024393	T	C	T	C	-0.0644	-0.0291491	0.9689	0.968758	FALSE	FALSE	FALSE	ieu-b-5123	1	110154688	0.0527368	NA	0.58045	HNC_noukb	Head and neck cancer (excl. UKB)	Head and neck cancer (excl. UKB) || ||	TRUE	igd	NA	NA	NA	NA	NA	NA	NA	1	110154688	0.0049	7.105e-39	782554	BMI_strict	TRUE	reported	HKLPXU	textfile	2	1	TRUE
	rs17094222	T	C	T	C	-0.0173	0.00612188	0.7912	0.792587	FALSE	FALSE	FALSE	ieu-b-5123	10	102395440	0.0227215	NA	0.787599	HNC_noukb	Head and neck cancer (excl. UKB)	Head and neck cancer (excl. UKB) || ||	TRUE	igd	NA	NA	NA	NA	NA	NA	NA	10	102395440	0.002	4.043e-18	806450	BMI_strict	TRUE	reported	HKLPXU	textfile	2	1	TRUE
	rs17149254	T	C	T	C	0.0238	-0.0168118	0.2051	0.172566	FALSE	FALSE	FALSE	ieu-b-5123	7	76691994	0.0251764	NA	0.504285	HNC_noukb	Head and neck cancer (excl. UKB)	Head and neck cancer (excl. UKB) || ||	TRUE	igd	TRUE	rs17149254	rs56076430	T	C	C	G	7	76634463	0.0023	2.993e-25	654047	BMI_strict	TRUE	reported	HKLPXU	textfile	2	1	TRUE
	rs17182027	A	G	A	G	-0.011	0.0124865	0.5647	0.556006	FALSE	FALSE	FALSE	ieu-b-5123	14	73348130	0.018573	NA	0.501398	HNC_noukb	Head and neck cancer (excl. UKB)	Head and neck cancer (excl. UKB) || ||	TRUE	igd	NA	NA	NA	NA	NA	NA	NA	14	73348130	0.0017	1.46e-10	717831	BMI_strict	TRUE	reported	HKLPXU	textfile	2	1	TRUE
	rs17207196	T	C	T	C	-0.022	-0.0247972	0.42	0.392636	FALSE	FALSE	FALSE	ieu-b-5123	7	75101065	0.0197623	NA	0.209562	HNC_noukb	Head and neck cancer (excl. UKB)	Head and neck cancer (excl. UKB) || ||	TRUE	igd	NA	NA	NA	NA	NA	NA	NA	7	75101065	0.0017	1.576e-36	694986	BMI_strict	TRUE	reported	HKLPXU	textfile	2	1	TRUE
	rs1721447	T	G	T	G	-0.01	-0.0131644	0.5096	0.532556	FALSE	FALSE	FALSE	ieu-b-5123	7	109214139	0.0184426	NA	0.475349	HNC_noukb	Head and neck cancer (excl. UKB)	Head and neck cancer (excl. UKB) || ||	TRUE	igd	NA	NA	NA	NA	NA	NA	NA	7	109214139	0.0017	3.793e-09	718656	BMI_strict	TRUE	reported	HKLPXU	textfile	2	1	TRUE
	rs17367750	T	C	T	C	-0.0122	-0.0113684	0.3117	0.322841	FALSE	FALSE	FALSE	ieu-b-5123	4	140782542	0.0198009	NA	0.565874	HNC_noukb	Head and neck cancer (excl. UKB)	Head and neck cancer (excl. UKB) || ||	TRUE	igd	NA	NA	NA	NA	NA	NA	NA	4	140782542	0.0018	1.969e-11	718303	BMI_strict	TRUE	reported	HKLPXU	textfile	2	1	TRUE
	rs17405603	A	T	A	T	-0.0125	-0.000530888	0.7062	0.700698	FALSE	TRUE	FALSE	ieu-b-5123	5	144608340	0.020447	NA	0.979286	HNC_noukb	Head and neck cancer (excl. UKB)	Head and neck cancer (excl. UKB) || ||	TRUE	igd	NA	NA	NA	NA	NA	NA	NA	5	144608340	0.0019	4.427e-11	716852	BMI_strict	TRUE	reported	HKLPXU	textfile	2	1	TRUE
	rs17405819	T	C	T	C	0.0211	-0.0139803	0.6845	0.696241	FALSE	FALSE	FALSE	ieu-b-5123	8	76806584	0.0199592	NA	0.48365	HNC_noukb	Head and neck cancer (excl. UKB)	Head and neck cancer (excl. UKB) || ||	TRUE	igd	NA	NA	NA	NA	NA	NA	NA	8	76806584	0.0018	6.04e-33	806765	BMI_strict	TRUE	reported	HKLPXU	textfile	2	1	TRUE
	rs1750307	A	T	A	T	0.0129	-0.00527845	0.3655	0.365574	FALSE	TRUE	FALSE	ieu-b-5123	1	156488420	0.0191775	NA	0.78313	HNC_noukb	Head and neck cancer (excl. UKB)	Head and neck cancer (excl. UKB) || ||	TRUE	igd	NA	NA	NA	NA	NA	NA	NA	1	156488420	0.0018	2.778e-13	718639	BMI_strict	TRUE	reported	HKLPXU	textfile	2	1	TRUE
	rs17636031	T	C	T	C	-0.0154	0.00329133	0.7244	0.718924	FALSE	FALSE	FALSE	ieu-b-5123	10	126594078	0.0208074	NA	0.874314	HNC_noukb	Head and neck cancer (excl. UKB)	Head and neck cancer (excl. UKB) || ||	TRUE	igd	NA	NA	NA	NA	NA	NA	NA	10	126594078	0.0018	3.87e-17	798189	BMI_strict	TRUE	reported	HKLPXU	textfile	2	1	TRUE
	rs17681451	A	G	A	G	-0.0225	-0.0425112	0.0762	0.0806106	FALSE	FALSE	FALSE	ieu-b-5123	3	114399296	0.0338632	NA	0.209341	HNC_noukb	Head and neck cancer (excl. UKB)	Head and neck cancer (excl. UKB) || ||	TRUE	igd	NA	NA	NA	NA	NA	NA	NA	3	114399296	0.0031	7.37e-13	718679	BMI_strict	TRUE	reported	HKLPXU	textfile	2	1	TRUE
	rs17724992	A	G	A	G	0.0172	0.0215486	0.7197	0.737774	FALSE	FALSE	FALSE	ieu-b-5123	19	18454825	0.0210065	NA	0.304983	HNC_noukb	Head and neck cancer (excl. UKB)	Head and neck cancer (excl. UKB) || ||	TRUE	igd	NA	NA	NA	NA	NA	NA	NA	19	18454825	0.0018	5.232e-21	804268	BMI_strict	TRUE	reported	HKLPXU	textfile	2	1	TRUE
	rs17783165	T	C	T	C	-0.0128	0.0305362	0.671	0.673647	FALSE	FALSE	FALSE	ieu-b-5123	18	63461638	0.0199126	NA	0.12515	HNC_noukb	Head and neck cancer (excl. UKB)	Head and neck cancer (excl. UKB) || ||	TRUE	igd	NA	NA	NA	NA	NA	NA	NA	18	63461638	0.0017	2.737e-13	801018	BMI_strict	TRUE	reported	HKLPXU	textfile	2	1	TRUE
	rs17806224	A	G	A	G	-0.026	-0.0391174	0.1808	0.177719	FALSE	FALSE	FALSE	ieu-b-5123	20	51065854	0.0242689	NA	0.106998	HNC_noukb	Head and neck cancer (excl. UKB)	Head and neck cancer (excl. UKB) || ||	TRUE	igd	NA	NA	NA	NA	NA	NA	NA	20	51065854	0.0022	7.908e-32	718699	BMI_strict	TRUE	reported	HKLPXU	textfile	2	1	TRUE
	rs17814208	A	G	A	G	-0.0129	-0.0133732	0.7575	0.755876	FALSE	FALSE	FALSE	ieu-b-5123	2	144037998	0.0213721	NA	0.531492	HNC_noukb	Head and neck cancer (excl. UKB)	Head and neck cancer (excl. UKB) || ||	TRUE	igd	NA	NA	NA	NA	NA	NA	NA	2	144037998	0.002	7.239e-11	718642	BMI_strict	TRUE	reported	HKLPXU	textfile	2	1	TRUE
	rs1799923	A	G	A	G	-0.0224	-0.00906679	0.1117	0.120473	FALSE	FALSE	FALSE	ieu-b-5123	3	42306294	0.0291582	NA	0.755838	HNC_noukb	Head and neck cancer (excl. UKB)	Head and neck cancer (excl. UKB) || ||	TRUE	igd	NA	NA	NA	NA	NA	NA	NA	3	42306294	0.0026	1.124e-17	718667	BMI_strict	TRUE	reported	HKLPXU	textfile	2	1	TRUE
	rs1808629	A	G	A	G	-0.0202	-0.00120623	0.674	0.681481	FALSE	FALSE	FALSE	ieu-b-5123	8	73435964	0.0201567	NA	0.952281	HNC_noukb	Head and neck cancer (excl. UKB)	Head and neck cancer (excl. UKB) || ||	TRUE	igd	NA	NA	NA	NA	NA	NA	NA	8	73435964	0.002	2.191e-23	484680	BMI_strict	TRUE	reported	HKLPXU	textfile	2	1	TRUE
	rs185350	T	C	T	C	0.0137	-0.0198929	0.4902	0.503013	FALSE	FALSE	FALSE	ieu-b-5123	19	34306816	0.0184341	NA	0.280526	HNC_noukb	Head and neck cancer (excl. UKB)	Head and neck cancer (excl. UKB) || ||	TRUE	igd	NA	NA	NA	NA	NA	NA	NA	19	34306816	0.0016	9.104e-17	805076	BMI_strict	TRUE	reported	HKLPXU	textfile	2	1	TRUE
	rs1860561	A	G	A	G	0.0159	-0.013245	0.2087	0.224952	FALSE	FALSE	FALSE	ieu-b-5123	12	110783241	0.0222442	NA	0.551551	HNC_noukb	Head and neck cancer (excl. UKB)	Head and neck cancer (excl. UKB) || ||	TRUE	igd	NA	NA	NA	NA	NA	NA	NA	12	110783241	0.0019	1.706e-16	806805	BMI_strict	TRUE	reported	HKLPXU	textfile	2	1	TRUE
	rs1877875	T	C	T	C	-0.0109	-0.0230293	0.4341	0.434631	FALSE	FALSE	FALSE	ieu-b-5123	9	120664469	0.0185302	NA	0.213944	HNC_noukb	Head and neck cancer (excl. UKB)	Head and neck cancer (excl. UKB) || ||	TRUE	igd	NA	NA	NA	NA	NA	NA	NA	9	120664469	0.0017	2.505e-10	718589	BMI_strict	TRUE	reported	HKLPXU	textfile	2	1	TRUE
	rs1884389	T	C	T	C	-0.0108	0.0201446	0.4386	0.438427	FALSE	FALSE	FALSE	ieu-b-5123	20	1410582	0.0186701	NA	0.280598	HNC_noukb	Head and neck cancer (excl. UKB)	Head and neck cancer (excl. UKB) || ||	TRUE	igd	NA	NA	NA	NA	NA	NA	NA	20	1410582	0.0017	3.724e-10	718491	BMI_strict	TRUE	reported	HKLPXU	textfile	2	1	TRUE
	rs1884897	A	G	A	G	-0.0184	-0.0385187	0.3747	0.369606	FALSE	FALSE	FALSE	ieu-b-5123	20	6614691	0.0191549	NA	0.0443353	HNC_noukb	Head and neck cancer (excl. UKB)	Head and neck cancer (excl. UKB) || ||	TRUE	igd	TRUE	rs1884897	rs1321432	A	G	A	C	20	6612832	0.0017	2.701e-28	806711	BMI_strict	TRUE	reported	HKLPXU	textfile	2	1	TRUE
	rs1927790	T	C	T	C	-0.014	0.0269139	0.606	0.585136	FALSE	FALSE	FALSE	ieu-b-5123	13	96922191	0.0187119	NA	0.150341	HNC_noukb	Head and neck cancer (excl. UKB)	Head and neck cancer (excl. UKB) || ||	TRUE	igd	NA	NA	NA	NA	NA	NA	NA	13	96922191	0.0016	1.571e-17	806731	BMI_strict	TRUE	reported	HKLPXU	textfile	2	1	TRUE
	rs1928295	T	C	T	C	0.0134	0.0382338	0.5712	0.563113	FALSE	FALSE	FALSE	ieu-b-5123	9	120378483	0.0185204	NA	0.0389789	HNC_noukb	Head and neck cancer (excl. UKB)	Head and neck cancer (excl. UKB) || ||	TRUE	igd	NA	NA	NA	NA	NA	NA	NA	9	120378483	0.0016	2.225e-16	806659	BMI_strict	TRUE	reported	HKLPXU	textfile	2	1	TRUE
	rs1941696	A	G	A	G	0.0112	0.010046	0.5174	0.517509	FALSE	FALSE	FALSE	ieu-b-5123	18	31252129	0.018318	NA	0.583403	HNC_noukb	Head and neck cancer (excl. UKB)	Head and neck cancer (excl. UKB) || ||	TRUE	igd	NA	NA	NA	NA	NA	NA	NA	18	31252129	0.0017	4.741e-11	718672	BMI_strict	TRUE	reported	HKLPXU	textfile	2	1	TRUE
	rs1948080	T	G	T	G	0.0136	0.0040309	0.6303	0.625693	FALSE	FALSE	FALSE	ieu-b-5123	9	11852043	0.0190479	NA	0.832404	HNC_noukb	Head and neck cancer (excl. UKB)	Head and neck cancer (excl. UKB) || ||	TRUE	igd	NA	NA	NA	NA	NA	NA	NA	9	11852043	0.0018	1.134e-14	718672	BMI_strict	TRUE	reported	HKLPXU	textfile	2	1	TRUE
	rs194809	A	G	A	G	0.0126	-0.0471026	0.1871	0.193664	FALSE	FALSE	FALSE	ieu-b-5123	16	23804956	0.0233989	NA	0.0441123	HNC_noukb	Head and neck cancer (excl. UKB)	Head and neck cancer (excl. UKB) || ||	TRUE	igd	NA	NA	NA	NA	NA	NA	NA	16	23804956	0.0022	4.861e-09	718688	BMI_strict	TRUE	reported	HKLPXU	textfile	2	1	TRUE
	rs1951455	T	C	T	C	-0.0148	0.0353864	0.2813	0.249994	FALSE	FALSE	FALSE	ieu-b-5123	14	91515754	0.0213053	NA	0.0967297	HNC_noukb	Head and neck cancer (excl. UKB)	Head and neck cancer (excl. UKB) || ||	TRUE	igd	TRUE	rs1951455	rs1296091	T	C	T	C	14	91512339	0.0019	6.048e-15	718607	BMI_strict	TRUE	reported	HKLPXU	textfile	2	1	TRUE
	rs1958898	C	G	C	G	-0.0146	-0.0116307	0.2098	0.212414	FALSE	TRUE	FALSE	ieu-b-5123	14	40886886	0.0224226	NA	0.603965	HNC_noukb	Head and neck cancer (excl. UKB)	Head and neck cancer (excl. UKB) || ||	TRUE	igd	NA	NA	NA	NA	NA	NA	NA	14	40886886	0.0021	4.225e-12	718191	BMI_strict	TRUE	reported	HKLPXU	textfile	2	1	TRUE
	rs1965529	A	G	A	G	0.0161	-0.0246513	0.773	0.778061	FALSE	FALSE	FALSE	ieu-b-5123	7	77829965	0.0221264	NA	0.265231	HNC_noukb	Head and neck cancer (excl. UKB)	Head and neck cancer (excl. UKB) || ||	TRUE	igd	TRUE	rs1965529	rs7792703	G	A	A	C	7	77825707	0.0022	7.659e-14	663213	BMI_strict	TRUE	reported	HKLPXU	textfile	2	1	TRUE
	rs197374	T	C	T	C	0.0141	-0.00604588	0.4027	0.391575	FALSE	FALSE	FALSE	ieu-b-5123	1	112289983	0.0188842	NA	0.74885	HNC_noukb	Head and neck cancer (excl. UKB)	Head and neck cancer (excl. UKB) || ||	TRUE	igd	NA	NA	NA	NA	NA	NA	NA	1	112289983	0.0017	3.155e-16	718653	BMI_strict	TRUE	reported	HKLPXU	textfile	2	1	TRUE
	rs1999433	T	C	T	C	-0.0107	-0.0144179	0.4403	0.4373	FALSE	FALSE	FALSE	ieu-b-5123	9	81371441	0.018754	NA	0.442017	HNC_noukb	Head and neck cancer (excl. UKB)	Head and neck cancer (excl. UKB) || ||	TRUE	igd	NA	NA	NA	NA	NA	NA	NA	9	81371441	0.0017	2.899e-10	718517	BMI_strict	TRUE	reported	HKLPXU	textfile	2	1	TRUE
	rs2007518	A	G	A	G	-0.013	0.00553702	0.5618	0.566168	FALSE	FALSE	FALSE	ieu-b-5123	11	132639606	0.0186472	NA	0.766516	HNC_noukb	Head and neck cancer (excl. UKB)	Head and neck cancer (excl. UKB) || ||	TRUE	igd	NA	NA	NA	NA	NA	NA	NA	11	132639606	0.0017	1.964e-14	718682	BMI_strict	TRUE	reported	HKLPXU	textfile	2	1	TRUE
	rs2047648	A	T	A	T	-0.0133	-0.001997	0.7465	0.743561	FALSE	TRUE	FALSE	ieu-b-5123	3	157044173	0.021122	NA	0.924676	HNC_noukb	Head and neck cancer (excl. UKB)	Head and neck cancer (excl. UKB) || ||	TRUE	igd	TRUE	rs2047648	rs10936081	T	A	A	G	3	157033438	0.002	7.947e-12	718280	BMI_strict	TRUE	reported	HKLPXU	textfile	2	1	TRUE
	rs2051559	T	C	T	C	-0.0167	-0.0262319	0.8588	0.862932	FALSE	FALSE	FALSE	ieu-b-5123	4	3298800	0.0267359	NA	0.32652	HNC_noukb	Head and neck cancer (excl. UKB)	Head and neck cancer (excl. UKB) || ||	TRUE	igd	NA	NA	NA	NA	NA	NA	NA	4	3298800	0.0025	3.775e-11	718374	BMI_strict	TRUE	reported	HKLPXU	textfile	2	1	TRUE
	rs2053682	A	C	A	C	0.017	-0.0068302	0.6784	0.674033	FALSE	FALSE	FALSE	ieu-b-5123	5	170599327	0.019837	NA	0.730609	HNC_noukb	Head and neck cancer (excl. UKB)	Head and neck cancer (excl. UKB) || ||	TRUE	igd	NA	NA	NA	NA	NA	NA	NA	5	170599327	0.0018	2.591e-20	717007	BMI_strict	TRUE	reported	HKLPXU	textfile	2	1	TRUE
	rs2058527	T	G	T	G	-0.0115	0.044709	0.2715	0.264903	FALSE	FALSE	FALSE	ieu-b-5123	16	6704749	0.020802	NA	0.0316133	HNC_noukb	Head and neck cancer (excl. UKB)	Head and neck cancer (excl. UKB) || ||	TRUE	igd	NA	NA	NA	NA	NA	NA	NA	16	6704749	0.0019	1.795e-09	718465	BMI_strict	TRUE	reported	HKLPXU	textfile	2	1	TRUE
	rs2065418	T	G	T	G	0.0139	0.0139159	0.646	0.639162	FALSE	FALSE	FALSE	ieu-b-5123	11	30422068	0.0191259	NA	0.46686	HNC_noukb	Head and neck cancer (excl. UKB)	Head and neck cancer (excl. UKB) || ||	TRUE	igd	NA	NA	NA	NA	NA	NA	NA	11	30422068	0.0018	6.073e-15	718408	BMI_strict	TRUE	reported	HKLPXU	textfile	2	1	TRUE
	rs2066295	A	G	A	G	0.0142	0.0292268	0.7577	0.765193	FALSE	FALSE	FALSE	ieu-b-5123	6	26168903	0.0217159	NA	0.178345	HNC_noukb	Head and neck cancer (excl. UKB)	Head and neck cancer (excl. UKB) || ||	TRUE	igd	NA	NA	NA	NA	NA	NA	NA	6	26168903	0.002	2.285e-12	718598	BMI_strict	TRUE	reported	HKLPXU	textfile	2	1	TRUE
	rs2074314	T	C	T	C	0.0105	0.0464016	0.6356	0.640598	FALSE	FALSE	FALSE	ieu-b-5123	11	17411821	0.0191527	NA	0.0154049	HNC_noukb	Head and neck cancer (excl. UKB)	Head and neck cancer (excl. UKB) || ||	TRUE	igd	NA	NA	NA	NA	NA	NA	NA	11	17411821	0.0017	1.369e-09	747074	BMI_strict	TRUE	reported	HKLPXU	textfile	2	1	TRUE
	rs2112347	T	G	T	G	0.0276	-0.0059049	0.6298	0.637867	FALSE	FALSE	FALSE	ieu-b-5123	5	75015242	0.0192895	NA	0.759513	HNC_noukb	Head and neck cancer (excl. UKB)	Head and neck cancer (excl. UKB) || ||	TRUE	igd	NA	NA	NA	NA	NA	NA	NA	5	75015242	0.0017	1.173e-61	806699	BMI_strict	TRUE	reported	HKLPXU	textfile	2	1	TRUE
	rs2134858	T	C	T	C	-0.0117	-0.0284102	0.5119	0.521494	FALSE	FALSE	FALSE	ieu-b-5123	9	73837155	0.0184904	NA	0.124421	HNC_noukb	Head and neck cancer (excl. UKB)	Head and neck cancer (excl. UKB) || ||	TRUE	igd	NA	NA	NA	NA	NA	NA	NA	9	73837155	0.0017	5.869e-12	718696	BMI_strict	TRUE	reported	HKLPXU	textfile	2	1	TRUE
	rs213518	T	C	T	C	-0.0153	-0.000543031	0.8498	0.858725	FALSE	FALSE	FALSE	ieu-b-5123	7	26941065	0.0264844	NA	0.983641	HNC_noukb	Head and neck cancer (excl. UKB)	Head and neck cancer (excl. UKB) || ||	TRUE	igd	NA	NA	NA	NA	NA	NA	NA	7	26941065	0.0024	2.492e-10	718433	BMI_strict	TRUE	reported	HKLPXU	textfile	2	1	TRUE
	rs214249	T	G	T	G	0.0138	-0.0103396	0.6071	0.611624	FALSE	FALSE	FALSE	ieu-b-5123	16	348687	0.018908	NA	0.584493	HNC_noukb	Head and neck cancer (excl. UKB)	Head and neck cancer (excl. UKB) || ||	TRUE	igd	NA	NA	NA	NA	NA	NA	NA	16	348687	0.0017	2.715e-15	718521	BMI_strict	TRUE	reported	HKLPXU	textfile	2	1	TRUE
	rs215669	A	G	A	G	-0.0149	-0.0248442	0.6024	0.612653	FALSE	FALSE	FALSE	ieu-b-5123	7	32378979	0.0190939	NA	0.193205	HNC_noukb	Head and neck cancer (excl. UKB)	Head and neck cancer (excl. UKB) || ||	TRUE	igd	NA	NA	NA	NA	NA	NA	NA	7	32378979	0.0017	8.938e-18	718120	BMI_strict	TRUE	reported	HKLPXU	textfile	2	1	TRUE
	rs217669	T	C	T	C	-0.0172	-0.0219063	0.7224	0.733645	FALSE	FALSE	FALSE	ieu-b-5123	14	62360075	0.0209659	NA	0.296091	HNC_noukb	Head and neck cancer (excl. UKB)	Head and neck cancer (excl. UKB) || ||	TRUE	igd	NA	NA	NA	NA	NA	NA	NA	14	62360075	0.0021	6.271e-16	484680	BMI_strict	TRUE	reported	HKLPXU	textfile	2	1	TRUE
	rs2192158	A	G	A	G	0.0137	-0.0137844	0.4492	0.454295	FALSE	FALSE	FALSE	ieu-b-5123	4	55505911	0.0186306	NA	0.459373	HNC_noukb	Head and neck cancer (excl. UKB)	Head and neck cancer (excl. UKB) || ||	TRUE	igd	TRUE	rs2192158	rs12499367	A	G	C	T	4	55505360	0.0017	7.417e-16	718510	BMI_strict	TRUE	reported	HKLPXU	textfile	2	1	TRUE
	rs2196618	A	G	A	G	-0.0137	0.0376894	0.2634	0.273672	FALSE	FALSE	FALSE	ieu-b-5123	8	85089437	0.021152	NA	0.0747756	HNC_noukb	Head and neck cancer (excl. UKB)	Head and neck cancer (excl. UKB) || ||	TRUE	igd	NA	NA	NA	NA	NA	NA	NA	8	85089437	0.0019	1.492e-12	718304	BMI_strict	TRUE	reported	HKLPXU	textfile	2	1	TRUE
	rs2206277	T	C	T	C	0.0408	-0.0292407	0.1557	0.187245	FALSE	FALSE	FALSE	ieu-b-5123	6	50798526	0.023567	NA	0.214699	HNC_noukb	Head and neck cancer (excl. UKB)	Head and neck cancer (excl. UKB) || ||	TRUE	igd	NA	NA	NA	NA	NA	NA	NA	6	50798526	0.0021	1.822e-83	806768	BMI_strict	TRUE	reported	HKLPXU	textfile	2	1	TRUE
	rs2228213	A	G	A	G	-0.0144	-0.0283712	0.3374	0.350531	FALSE	FALSE	FALSE	ieu-b-5123	6	12124855	0.0192702	NA	0.140943	HNC_noukb	Head and neck cancer (excl. UKB)	Head and neck cancer (excl. UKB) || ||	TRUE	igd	NA	NA	NA	NA	NA	NA	NA	6	12124855	0.0017	5.498e-17	806782	BMI_strict	TRUE	reported	HKLPXU	textfile	2	1	TRUE
	rs2228552	T	G	T	G	0.0124	-0.0328697	0.5663	0.639226	FALSE	FALSE	FALSE	ieu-b-5123	1	32165495	0.019393	NA	0.0900886	HNC_noukb	Head and neck cancer (excl. UKB)	Head and neck cancer (excl. UKB) || ||	TRUE	igd	NA	NA	NA	NA	NA	NA	NA	1	32165495	0.0019	1.795e-11	588348	BMI_strict	TRUE	reported	HKLPXU	textfile	2	1	TRUE
	rs2241423	A	G	A	G	-0.0298	0.0765868	0.2285	0.218574	FALSE	FALSE	FALSE	ieu-b-5123	15	68086838	0.0220509	NA	0.00051434	HNC_noukb	Head and neck cancer (excl. UKB)	Head and neck cancer (excl. UKB) || ||	TRUE	igd	NA	NA	NA	NA	NA	NA	NA	15	68086838	0.0019	3.602e-54	806797	BMI_strict	TRUE	reported	HKLPXU	textfile	2	1	TRUE
	rs2246012	T	C	T	C	-0.0161	-0.0531827	0.8512	0.835764	FALSE	FALSE	FALSE	ieu-b-5123	6	131898208	0.0247014	NA	0.031317	HNC_noukb	Head and neck cancer (excl. UKB)	Head and neck cancer (excl. UKB) || ||	TRUE	igd	NA	NA	NA	NA	NA	NA	NA	6	131898208	0.0022	1.154e-13	806786	BMI_strict	TRUE	reported	HKLPXU	textfile	2	1	TRUE
	rs2257791	A	G	A	G	-0.0139	0.0242295	0.756	0.729421	FALSE	FALSE	FALSE	ieu-b-5123	10	118665788	0.0212082	NA	0.253262	HNC_noukb	Head and neck cancer (excl. UKB)	Head and neck cancer (excl. UKB) || ||	TRUE	igd	TRUE	rs2257791	rs2531689	G	A	G	A	10	118643670	0.002	1.631e-12	718675	BMI_strict	TRUE	reported	HKLPXU	textfile	2	1	TRUE
	rs225882	T	C	T	C	0.0113	0.0359956	0.7513	0.730479	FALSE	FALSE	FALSE	ieu-b-5123	14	30480123	0.0210479	NA	0.0872328	HNC_noukb	Head and neck cancer (excl. UKB)	Head and neck cancer (excl. UKB) || ||	TRUE	igd	NA	NA	NA	NA	NA	NA	NA	14	30480123	0.0018	8.564e-10	806807	BMI_strict	TRUE	reported	HKLPXU	textfile	2	1	TRUE
	rs2267958	A	G	A	G	-0.013	0.0186129	0.5088	0.505416	FALSE	FALSE	FALSE	ieu-b-5123	9	131015279	0.0195161	NA	0.340225	HNC_noukb	Head and neck cancer (excl. UKB)	Head and neck cancer (excl. UKB) || ||	TRUE	igd	NA	NA	NA	NA	NA	NA	NA	9	131015279	0.0018	2.013e-13	710694	BMI_strict	TRUE	reported	HKLPXU	textfile	2	1	TRUE
	rs2271046	A	T	A	T	-0.0115	-0.0346727	0.6948	0.73219	FALSE	TRUE	FALSE	ieu-b-5123	4	52752812	0.0214473	NA	0.105955	HNC_noukb	Head and neck cancer (excl. UKB)	Head and neck cancer (excl. UKB) || ||	TRUE	igd	NA	NA	NA	NA	NA	NA	NA	4	52752812	0.0018	3.031e-10	718692	BMI_strict	TRUE	reported	HKLPXU	textfile	2	1	TRUE
	rs2273175	T	C	T	C	-0.0121	-0.0449143	0.6791	0.670796	FALSE	FALSE	FALSE	ieu-b-5123	14	104160141	0.0195208	NA	0.0214008	HNC_noukb	Head and neck cancer (excl. UKB)	Head and neck cancer (excl. UKB) || ||	TRUE	igd	NA	NA	NA	NA	NA	NA	NA	14	104160141	0.0018	3.69e-11	718683	BMI_strict	TRUE	reported	HKLPXU	textfile	2	1	TRUE
	rs2275003	A	G	A	G	0.0111	0.00730147	0.5007	0.477253	FALSE	FALSE	FALSE	ieu-b-5123	9	34124860	0.0184203	NA	0.691823	HNC_noukb	Head and neck cancer (excl. UKB)	Head and neck cancer (excl. UKB) || ||	TRUE	igd	NA	NA	NA	NA	NA	NA	NA	9	34124860	0.0016	9.438e-12	806747	BMI_strict	TRUE	reported	HKLPXU	textfile	2	1	TRUE
	rs2281819	A	T	A	T	-0.0154	0.0353674	0.2293	0.229684	FALSE	TRUE	FALSE	ieu-b-5123	6	33771673	0.0217813	NA	0.104429	HNC_noukb	Head and neck cancer (excl. UKB)	Head and neck cancer (excl. UKB) || ||	TRUE	igd	NA	NA	NA	NA	NA	NA	NA	6	33771673	0.002	2.088e-14	717097	BMI_strict	TRUE	reported	HKLPXU	textfile	2	1	TRUE
	rs2283006	A	G	A	G	0.0132	-0.0187656	0.4881	0.490237	FALSE	FALSE	FALSE	ieu-b-5123	7	93085722	0.0188377	NA	0.319168	HNC_noukb	Head and neck cancer (excl. UKB)	Head and neck cancer (excl. UKB) || ||	TRUE	igd	NA	NA	NA	NA	NA	NA	NA	7	93085722	0.0017	8.055e-15	717331	BMI_strict	TRUE	reported	HKLPXU	textfile	2	1	TRUE
	rs2289379	T	C	T	C	-0.0137	0.0048112	0.3917	0.397239	FALSE	FALSE	FALSE	ieu-b-5123	7	44804225	0.0189137	NA	0.799204	HNC_noukb	Head and neck cancer (excl. UKB)	Head and neck cancer (excl. UKB) || ||	TRUE	igd	NA	NA	NA	NA	NA	NA	NA	7	44804225	0.0018	7.019e-15	715836	BMI_strict	TRUE	reported	HKLPXU	textfile	2	1	TRUE
	rs2342892	T	G	T	G	0.0126	0.00782081	0.4855	0.491536	FALSE	FALSE	FALSE	ieu-b-5123	16	24540806	0.0184641	NA	0.67188	HNC_noukb	Head and neck cancer (excl. UKB)	Head and neck cancer (excl. UKB) || ||	TRUE	igd	NA	NA	NA	NA	NA	NA	NA	16	24540806	0.0017	1.328e-13	714485	BMI_strict	TRUE	reported	HKLPXU	textfile	2	1	TRUE
	rs2357760	A	G	A	G	0.0143	0.0124349	0.6735	0.673656	FALSE	FALSE	FALSE	ieu-b-5123	6	120213880	0.0196354	NA	0.526546	HNC_noukb	Head and neck cancer (excl. UKB)	Head and neck cancer (excl. UKB) || ||	TRUE	igd	NA	NA	NA	NA	NA	NA	NA	6	120213880	0.0017	2.106e-16	806795	BMI_strict	TRUE	reported	HKLPXU	textfile	2	1	TRUE
	rs2365389	T	C	T	C	-0.0168	-0.00699789	0.3999	0.409263	FALSE	FALSE	FALSE	ieu-b-5123	3	61236462	0.0188123	NA	0.709905	HNC_noukb	Head and neck cancer (excl. UKB)	Head and neck cancer (excl. UKB) || ||	TRUE	igd	NA	NA	NA	NA	NA	NA	NA	3	61236462	0.0016	6.494e-25	801448	BMI_strict	TRUE	reported	HKLPXU	textfile	2	1	TRUE
	rs2396625	A	T	A	T	-0.0176	0.00178232	0.4183	0.423332	FALSE	TRUE	TRUE	ieu-b-5123	7	113028634	0.0188934	NA	0.924843	HNC_noukb	Head and neck cancer (excl. UKB)	Head and neck cancer (excl. UKB) || ||	TRUE	igd	NA	NA	NA	NA	NA	NA	NA	7	113028634	0.0017	2.805e-24	718567	BMI_strict	TRUE	reported	HKLPXU	textfile	2	1	FALSE
	rs2400414	T	C	T	C	-0.0126	-0.0122661	0.3461	0.36202	FALSE	FALSE	FALSE	ieu-b-5123	1	194965200	0.0191677	NA	0.522215	HNC_noukb	Head and neck cancer (excl. UKB)	Head and neck cancer (excl. UKB) || ||	TRUE	igd	NA	NA	NA	NA	NA	NA	NA	1	194965200	0.0018	5.521e-13	718698	BMI_strict	TRUE	reported	HKLPXU	textfile	2	1	TRUE
	rs2436728	A	G	A	G	0.0189	-0.00781802	0.4073	0.412723	FALSE	FALSE	FALSE	ieu-b-5123	6	40365601	0.0183354	NA	0.669824	HNC_noukb	Head and neck cancer (excl. UKB)	Head and neck cancer (excl. UKB) || ||	TRUE	igd	NA	NA	NA	NA	NA	NA	NA	6	40365601	0.0017	1.969e-29	718640	BMI_strict	TRUE	reported	HKLPXU	textfile	2	1	TRUE
	rs2439823	A	G	A	G	-0.0165	-0.00236993	0.4514	0.457042	FALSE	FALSE	FALSE	ieu-b-5123	10	99778226	0.0186339	NA	0.898795	HNC_noukb	Head and neck cancer (excl. UKB)	Head and neck cancer (excl. UKB) || ||	TRUE	igd	NA	NA	NA	NA	NA	NA	NA	10	99778226	0.0017	6.513e-22	718034	BMI_strict	TRUE	reported	HKLPXU	textfile	2	1	TRUE
	rs2466103	T	G	T	G	-0.0121	-0.0129128	0.6928	0.700291	FALSE	FALSE	FALSE	ieu-b-5123	8	32412304	0.0199952	NA	0.518413	HNC_noukb	Head and neck cancer (excl. UKB)	Head and neck cancer (excl. UKB) || ||	TRUE	igd	NA	NA	NA	NA	NA	NA	NA	8	32412304	0.0018	8.004e-12	802631	BMI_strict	TRUE	reported	HKLPXU	textfile	2	1	TRUE
	rs2470893	T	C	T	C	0.0107	0.0388475	0.3049	0.320572	FALSE	FALSE	FALSE	ieu-b-5123	15	75019449	0.0197341	NA	0.0490061	HNC_noukb	Head and neck cancer (excl. UKB)	Head and neck cancer (excl. UKB) || ||	TRUE	igd	NA	NA	NA	NA	NA	NA	NA	15	75019449	0.0017	9.43e-10	803692	BMI_strict	TRUE	reported	HKLPXU	textfile	2	1	TRUE
	rs2503185	A	G	A	G	0.013	0.0606547	0.5097	0.532886	FALSE	FALSE	FALSE	ieu-b-5123	1	66461401	0.0185138	NA	0.00105216	HNC_noukb	Head and neck cancer (excl. UKB)	Head and neck cancer (excl. UKB) || ||	TRUE	igd	NA	NA	NA	NA	NA	NA	NA	1	66461401	0.0017	1.327e-14	717297	BMI_strict	TRUE	reported	HKLPXU	textfile	2	1	TRUE
	rs2513999	A	G	A	G	-0.0154	-0.0257393	0.1593	0.153007	FALSE	FALSE	FALSE	ieu-b-5123	11	103019633	0.0261854	NA	0.325625	HNC_noukb	Head and neck cancer (excl. UKB)	Head and neck cancer (excl. UKB) || ||	TRUE	igd	NA	NA	NA	NA	NA	NA	NA	11	103019633	0.0026	3.066e-09	484680	BMI_strict	TRUE	reported	HKLPXU	textfile	2	1	TRUE
	rs2600226	T	C	T	C	-0.0116	0.0295725	0.6712	0.670824	FALSE	FALSE	FALSE	ieu-b-5123	3	12928762	0.0196983	NA	0.133285	HNC_noukb	Head and neck cancer (excl. UKB)	Head and neck cancer (excl. UKB) || ||	TRUE	igd	NA	NA	NA	NA	NA	NA	NA	3	12928762	0.0018	1.423e-10	718538	BMI_strict	TRUE	reported	HKLPXU	textfile	2	1	TRUE
	rs2605603	A	G	A	G	-0.0103	-0.00223736	0.4812	0.488772	FALSE	FALSE	FALSE	ieu-b-5123	11	93221105	0.0183958	NA	0.903197	HNC_noukb	Head and neck cancer (excl. UKB)	Head and neck cancer (excl. UKB) || ||	TRUE	igd	NA	NA	NA	NA	NA	NA	NA	11	93221105	0.0016	2.041e-10	806679	BMI_strict	TRUE	reported	HKLPXU	textfile	2	1	TRUE
	rs2622274	T	G	T	G	-0.0107	0.00241184	0.4553	0.438574	FALSE	FALSE	FALSE	ieu-b-5123	6	64240516	0.0185882	NA	0.896763	HNC_noukb	Head and neck cancer (excl. UKB)	Head and neck cancer (excl. UKB) || ||	TRUE	igd	NA	NA	NA	NA	NA	NA	NA	6	64240516	0.0017	3.23e-10	718675	BMI_strict	TRUE	reported	HKLPXU	textfile	2	1	TRUE
	rs264941	A	C	A	C	-0.0124	-0.0371799	0.4679	0.460218	FALSE	FALSE	FALSE	ieu-b-5123	2	104297420	0.0184681	NA	0.0440941	HNC_noukb	Head and neck cancer (excl. UKB)	Head and neck cancer (excl. UKB) || ||	TRUE	igd	NA	NA	NA	NA	NA	NA	NA	2	104297420	0.0017	1.836e-13	718689	BMI_strict	TRUE	reported	HKLPXU	textfile	2	1	TRUE
	rs2715423	A	G	A	G	-0.0115	0.0318534	0.2805	0.285183	FALSE	FALSE	FALSE	ieu-b-5123	15	99511873	0.0204915	NA	0.120071	HNC_noukb	Head and neck cancer (excl. UKB)	Head and neck cancer (excl. UKB) || ||	TRUE	igd	NA	NA	NA	NA	NA	NA	NA	15	99511873	0.0019	1.901e-09	706401	BMI_strict	TRUE	reported	HKLPXU	textfile	2	1	TRUE
	rs273512	T	C	T	C	0.0156	0.0205851	0.409	0.413104	FALSE	FALSE	FALSE	ieu-b-5123	19	18224729	0.0186842	NA	0.270576	HNC_noukb	Head and neck cancer (excl. UKB)	Head and neck cancer (excl. UKB) || ||	TRUE	igd	NA	NA	NA	NA	NA	NA	NA	19	18224729	0.0018	4.477e-19	718525	BMI_strict	TRUE	reported	HKLPXU	textfile	2	1	TRUE
	rs2744974	T	C	T	C	0.0261	-0.0255291	0.3239	0.332064	FALSE	FALSE	FALSE	ieu-b-5123	6	34579431	0.0193905	NA	0.187979	HNC_noukb	Head and neck cancer (excl. UKB)	Head and neck cancer (excl. UKB) || ||	TRUE	igd	NA	NA	NA	NA	NA	NA	NA	6	34579431	0.0017	1.275e-51	804150	BMI_strict	TRUE	reported	HKLPXU	textfile	2	1	TRUE
	rs2777768	A	G	A	G	0.0119	-0.0370496	0.7228	0.732477	FALSE	FALSE	FALSE	ieu-b-5123	9	84186734	0.0209695	NA	0.0772556	HNC_noukb	Head and neck cancer (excl. UKB)	Head and neck cancer (excl. UKB) || ||	TRUE	igd	NA	NA	NA	NA	NA	NA	NA	9	84186734	0.0019	6.377e-10	718589	BMI_strict	TRUE	reported	HKLPXU	textfile	2	1	TRUE
	rs2820295	A	G	A	G	0.0235	0.0215213	0.3266	0.337493	FALSE	FALSE	FALSE	ieu-b-5123	1	201800868	0.0193279	NA	0.265501	HNC_noukb	Head and neck cancer (excl. UKB)	Head and neck cancer (excl. UKB) || ||	TRUE	igd	NA	NA	NA	NA	NA	NA	NA	1	201800868	0.0018	5.556e-39	718545	BMI_strict	TRUE	reported	HKLPXU	textfile	2	1	TRUE
	rs2832283	A	G	A	G	0.0115	0.0225936	0.2254	0.222418	FALSE	FALSE	FALSE	ieu-b-5123	21	30690558	0.022136	NA	0.307411	HNC_noukb	Head and neck cancer (excl. UKB)	Head and neck cancer (excl. UKB) || ||	TRUE	igd	NA	NA	NA	NA	NA	NA	NA	21	30690558	0.002	4.718e-09	806772	BMI_strict	TRUE	reported	HKLPXU	textfile	2	1	TRUE
	rs28350	A	G	A	G	0.0172	0.0353604	0.1717	0.802897	FALSE	FALSE	FALSE	ieu-b-5123	3	42425059	0.0239416	NA	0.139691	HNC_noukb	Head and neck cancer (excl. UKB)	Head and neck cancer (excl. UKB) || ||	TRUE	igd	TRUE	rs28350	rs33494	A	G	C	G	3	42418446	0.0022	1.074e-14	717783	BMI_strict	TRUE	reported	HKLPXU	textfile	2	1	TRUE
	rs28489620	A	G	A	G	-0.0151	0.0102181	0.2818	0.296618	FALSE	FALSE	FALSE	ieu-b-5123	22	41804716	0.0202817	NA	0.614397	HNC_noukb	Head and neck cancer (excl. UKB)	Head and neck cancer (excl. UKB) || ||	TRUE	igd	NA	NA	NA	NA	NA	NA	NA	22	41804716	0.0021	1.423e-12	484680	BMI_strict	TRUE	reported	HKLPXU	textfile	2	1	TRUE
	rs2861089	A	T	A	T	0.0105	0.0145872	0.3806	0.376317	FALSE	TRUE	FALSE	ieu-b-5123	5	164557954	0.0190674	NA	0.444251	HNC_noukb	Head and neck cancer (excl. UKB)	Head and neck cancer (excl. UKB) || ||	TRUE	igd	NA	NA	NA	NA	NA	NA	NA	5	164557954	0.0017	1.549e-09	718566	BMI_strict	TRUE	reported	HKLPXU	textfile	2	1	TRUE
	rs2861685	T	C	T	C	0.0165	0.00558564	0.5864	0.594241	FALSE	FALSE	FALSE	ieu-b-5123	2	67837553	0.018762	NA	0.765925	HNC_noukb	Head and neck cancer (excl. UKB)	Head and neck cancer (excl. UKB) || ||	TRUE	igd	NA	NA	NA	NA	NA	NA	NA	2	67837553	0.0019	7.823e-18	484680	BMI_strict	TRUE	reported	HKLPXU	textfile	2	1	TRUE
	rs2862996	T	G	T	G	-0.0216	-0.0136218	0.7012	0.695493	FALSE	FALSE	FALSE	ieu-b-5123	11	43653833	0.0199289	NA	0.494277	HNC_noukb	Head and neck cancer (excl. UKB)	Head and neck cancer (excl. UKB) || ||	TRUE	igd	NA	NA	NA	NA	NA	NA	NA	11	43653833	0.0017	3.604e-35	806675	BMI_strict	TRUE	reported	HKLPXU	textfile	2	1	TRUE
	rs2875762	C	G	C	G	0.0129	-0.0136606	0.252	0.239283	FALSE	TRUE	FALSE	ieu-b-5123	6	124925032	0.0217462	NA	0.529885	HNC_noukb	Head and neck cancer (excl. UKB)	Head and neck cancer (excl. UKB) || ||	TRUE	igd	NA	NA	NA	NA	NA	NA	NA	6	124925032	0.002	1.066e-10	717481	BMI_strict	TRUE	reported	HKLPXU	textfile	2	1	TRUE
	rs2907948	A	G	A	G	-0.0145	0.0183034	0.244	0.236991	FALSE	FALSE	FALSE	ieu-b-5123	7	150638484	0.0215693	NA	0.396113	HNC_noukb	Head and neck cancer (excl. UKB)	Head and neck cancer (excl. UKB) || ||	TRUE	igd	NA	NA	NA	NA	NA	NA	NA	7	150638484	0.0019	1.945e-14	806659	BMI_strict	TRUE	reported	HKLPXU	textfile	2	1	TRUE
	rs2910026	T	C	T	C	-0.0132	-0.0150775	0.7222	0.719229	FALSE	FALSE	FALSE	ieu-b-5123	5	152529936	0.020525	NA	0.462587	HNC_noukb	Head and neck cancer (excl. UKB)	Head and neck cancer (excl. UKB) || ||	TRUE	igd	NA	NA	NA	NA	NA	NA	NA	5	152529936	0.0021	5.688e-10	484680	BMI_strict	TRUE	reported	HKLPXU	textfile	2	1	TRUE
	rs2962334	T	G	T	G	0.0396	0.0230424	0.0272	0.023386	FALSE	FALSE	FALSE	ieu-b-5123	5	86879056	0.0605203	NA	0.703398	HNC_noukb	Head and neck cancer (excl. UKB)	Head and neck cancer (excl. UKB) || ||	TRUE	igd	NA	NA	NA	NA	NA	NA	NA	5	86879056	0.0059	1.777e-11	715204	BMI_strict	TRUE	reported	HKLPXU	textfile	2	1	TRUE
	rs2984618	T	G	T	G	0.0165	-0.0118637	0.4408	0.404745	FALSE	FALSE	FALSE	ieu-b-5123	1	47690438	0.0187573	NA	0.52707	HNC_noukb	Head and neck cancer (excl. UKB)	Head and neck cancer (excl. UKB) || ||	TRUE	igd	NA	NA	NA	NA	NA	NA	NA	1	47690438	0.0016	3.803e-24	806433	BMI_strict	TRUE	reported	HKLPXU	textfile	2	1	TRUE
	rs3101336	T	C	T	C	-0.0254	0.00959241	0.3825	0.388032	FALSE	FALSE	FALSE	ieu-b-5123	1	72751185	0.0189879	NA	0.613429	HNC_noukb	Head and neck cancer (excl. UKB)	Head and neck cancer (excl. UKB) || ||	TRUE	igd	NA	NA	NA	NA	NA	NA	NA	1	72751185	0.0016	4.804e-54	801552	BMI_strict	TRUE	reported	HKLPXU	textfile	2	1	TRUE
	rs3115667	T	C	T	C	-0.0179	-0.0260546	0.2821	0.258897	FALSE	FALSE	FALSE	ieu-b-5123	6	31643399	0.0210115	NA	0.214968	HNC_noukb	Head and neck cancer (excl. UKB)	Head and neck cancer (excl. UKB) || ||	TRUE	igd	NA	NA	NA	NA	NA	NA	NA	6	31643399	0.0019	5.924e-21	717285	BMI_strict	TRUE	reported	HKLPXU	textfile	2	1	TRUE
	rs312750	A	G	A	G	0.0097	0.0141546	0.4986	0.484367	FALSE	FALSE	FALSE	ieu-b-5123	17	68343539	0.0184108	NA	0.442	HNC_noukb	Head and neck cancer (excl. UKB)	Head and neck cancer (excl. UKB) || ||	TRUE	igd	NA	NA	NA	NA	NA	NA	NA	17	68343539	0.0016	2.565e-09	806739	BMI_strict	TRUE	reported	HKLPXU	textfile	2	1	TRUE
	rs321237	A	G	A	G	0.0126	-0.00328148	0.7498	0.738818	FALSE	FALSE	FALSE	ieu-b-5123	1	96478125	0.0210235	NA	0.875965	HNC_noukb	Head and neck cancer (excl. UKB)	Head and neck cancer (excl. UKB) || ||	TRUE	igd	NA	NA	NA	NA	NA	NA	NA	1	96478125	0.002	1.488e-10	718362	BMI_strict	TRUE	reported	HKLPXU	textfile	2	1	TRUE
	rs326893	T	C	T	C	0.0121	-0.0272127	0.5812	0.606003	FALSE	FALSE	FALSE	ieu-b-5123	4	112691776	0.0189496	NA	0.150986	HNC_noukb	Head and neck cancer (excl. UKB)	Head and neck cancer (excl. UKB) || ||	TRUE	igd	NA	NA	NA	NA	NA	NA	NA	4	112691776	0.0017	1.893e-12	718672	BMI_strict	TRUE	reported	HKLPXU	textfile	2	1	TRUE
	rs337637	A	G	A	G	-0.0137	0.0116895	0.359	0.348862	FALSE	FALSE	FALSE	ieu-b-5123	4	38604470	0.0193786	NA	0.546364	HNC_noukb	Head and neck cancer (excl. UKB)	Head and neck cancer (excl. UKB) || ||	TRUE	igd	NA	NA	NA	NA	NA	NA	NA	4	38604470	0.0017	6.237e-16	806528	BMI_strict	TRUE	reported	HKLPXU	textfile	2	1	TRUE
	rs339991	A	G	A	G	-0.0125	0.0227624	0.4201	0.434265	FALSE	FALSE	FALSE	ieu-b-5123	15	60913637	0.0187233	NA	0.22409	HNC_noukb	Head and neck cancer (excl. UKB)	Head and neck cancer (excl. UKB) || ||	TRUE	igd	NA	NA	NA	NA	NA	NA	NA	15	60913637	0.0017	3.514e-13	717095	BMI_strict	TRUE	reported	HKLPXU	textfile	2	1	TRUE
	rs34184235	T	C	T	C	-0.0115	0.0128612	0.4353	0.438631	FALSE	FALSE	FALSE	ieu-b-5123	3	86192846	0.0186535	NA	0.490521	HNC_noukb	Head and neck cancer (excl. UKB)	Head and neck cancer (excl. UKB) || ||	TRUE	igd	NA	NA	NA	NA	NA	NA	NA	3	86192846	0.0019	2.143e-09	484680	BMI_strict	TRUE	reported	HKLPXU	textfile	2	1	TRUE
	rs34234296	A	G	A	G	-0.0145	0.0117079	0.3876	0.377651	FALSE	FALSE	FALSE	ieu-b-5123	2	175166636	0.0192694	NA	0.543459	HNC_noukb	Head and neck cancer (excl. UKB)	Head and neck cancer (excl. UKB) || ||	TRUE	igd	NA	NA	NA	NA	NA	NA	NA	2	175166636	0.002	2.011e-13	484680	BMI_strict	TRUE	reported	HKLPXU	textfile	2	1	TRUE
	rs34517439	A	C	A	C	0.0391	0.00964818	0.1168	0.119653	FALSE	FALSE	FALSE	ieu-b-5123	1	78450517	0.0288233	NA	0.737824	HNC_noukb	Head and neck cancer (excl. UKB)	Head and neck cancer (excl. UKB) || ||	TRUE	igd	NA	NA	NA	NA	NA	NA	NA	1	78450517	0.003	3.403e-39	484680	BMI_strict	TRUE	reported	HKLPXU	textfile	2	1	TRUE
	rs34811474	A	G	A	G	-0.0293	0.00865218	0.2224	0.223154	FALSE	FALSE	FALSE	ieu-b-5123	4	25408838	0.0234273	NA	0.711889	HNC_noukb	Head and neck cancer (excl. UKB)	Head and neck cancer (excl. UKB) || ||	TRUE	igd	NA	NA	NA	NA	NA	NA	NA	4	25408838	0.0023	8.504e-38	484680	BMI_strict	TRUE	reported	HKLPXU	textfile	2	1	TRUE
	rs349088	A	C	A	C	-0.013	-0.00139987	0.4777	0.498812	FALSE	FALSE	FALSE	ieu-b-5123	11	84814393	0.0183748	NA	0.939272	HNC_noukb	Head and neck cancer (excl. UKB)	Head and neck cancer (excl. UKB) || ||	TRUE	igd	NA	NA	NA	NA	NA	NA	NA	11	84814393	0.0017	3.501e-14	718429	BMI_strict	TRUE	reported	HKLPXU	textfile	2	1	TRUE
	rs35483388	T	C	T	C	0.0125	0.0117449	0.3794	0.384332	FALSE	FALSE	FALSE	ieu-b-5123	11	122545146	0.0190842	NA	0.538274	HNC_noukb	Head and neck cancer (excl. UKB)	Head and neck cancer (excl. UKB) || ||	TRUE	igd	NA	NA	NA	NA	NA	NA	NA	11	122545146	0.002	2.607e-10	484680	BMI_strict	TRUE	reported	HKLPXU	textfile	2	1	TRUE
	rs355777	C	G	C	G	0.0151	0.0107637	0.3984	0.411332	FALSE	TRUE	FALSE	ieu-b-5123	3	154034950	0.0187725	NA	0.566389	HNC_noukb	Head and neck cancer (excl. UKB)	Head and neck cancer (excl. UKB) || ||	TRUE	igd	NA	NA	NA	NA	NA	NA	NA	3	154034950	0.0017	2.129e-18	718342	BMI_strict	TRUE	reported	HKLPXU	textfile	2	1	TRUE
	rs35867081	A	G	A	G	0.015	0.0209864	0.4871	0.49377	FALSE	FALSE	FALSE	ieu-b-5123	17	79047278	0.0186868	NA	0.261414	HNC_noukb	Head and neck cancer (excl. UKB)	Head and neck cancer (excl. UKB) || ||	TRUE	igd	NA	NA	NA	NA	NA	NA	NA	17	79047278	0.0019	6.648e-15	484680	BMI_strict	TRUE	reported	HKLPXU	textfile	2	1	TRUE
	rs35949039	T	G	T	G	-0.0215	-0.035038	0.1056	0.105944	FALSE	FALSE	FALSE	ieu-b-5123	16	70572605	0.0302987	NA	0.247509	HNC_noukb	Head and neck cancer (excl. UKB)	Head and neck cancer (excl. UKB) || ||	TRUE	igd	NA	NA	NA	NA	NA	NA	NA	16	70572605	0.0031	6.297e-12	484680	BMI_strict	TRUE	reported	HKLPXU	textfile	2	1	TRUE
	rs3796432	T	G	T	G	-0.0113	-0.0174123	0.3672	0.363234	FALSE	FALSE	FALSE	ieu-b-5123	4	96030402	0.0189633	NA	0.358508	HNC_noukb	Head and neck cancer (excl. UKB)	Head and neck cancer (excl. UKB) || ||	TRUE	igd	NA	NA	NA	NA	NA	NA	NA	4	96030402	0.0018	2.214e-10	718567	BMI_strict	TRUE	reported	HKLPXU	textfile	2	1	TRUE
	rs3806114	A	G	A	G	-0.012	-0.0214716	0.6916	0.672613	FALSE	FALSE	FALSE	ieu-b-5123	6	20482335	0.0198662	NA	0.279783	HNC_noukb	Head and neck cancer (excl. UKB)	Head and neck cancer (excl. UKB) || ||	TRUE	igd	NA	NA	NA	NA	NA	NA	NA	6	20482335	0.0018	1.459e-11	804965	BMI_strict	TRUE	reported	HKLPXU	textfile	2	1	TRUE
	rs3808477	T	C	T	C	-0.0182	0.00173253	0.274	0.274605	FALSE	FALSE	FALSE	ieu-b-5123	8	116670347	0.0205886	NA	0.932937	HNC_noukb	Head and neck cancer (excl. UKB)	Head and neck cancer (excl. UKB) || ||	TRUE	igd	NA	NA	NA	NA	NA	NA	NA	8	116670347	0.0019	8.726e-22	718439	BMI_strict	TRUE	reported	HKLPXU	textfile	2	1	TRUE
	rs3814883	T	C	T	C	0.0227	0.0154553	0.4795	0.462458	FALSE	FALSE	FALSE	ieu-b-5123	16	29994922	0.0192139	NA	0.421179	HNC_noukb	Head and neck cancer (excl. UKB)	Head and neck cancer (excl. UKB) || ||	TRUE	igd	NA	NA	NA	NA	NA	NA	NA	16	29994922	0.0017	1.471e-40	717877	BMI_strict	TRUE	reported	HKLPXU	textfile	2	1	TRUE
	rs3825061	T	C	T	C	0.014	0.0211635	0.3863	0.388073	FALSE	FALSE	FALSE	ieu-b-5123	11	118944675	0.0190363	NA	0.266249	HNC_noukb	Head and neck cancer (excl. UKB)	Head and neck cancer (excl. UKB) || ||	TRUE	igd	NA	NA	NA	NA	NA	NA	NA	11	118944675	0.0017	6.149e-16	718354	BMI_strict	TRUE	reported	HKLPXU	textfile	2	1	TRUE
	rs3902951	T	G	T	G	-0.0134	-0.017814	0.7691	0.749838	FALSE	FALSE	FALSE	ieu-b-5123	14	69789755	0.0213556	NA	0.404191	HNC_noukb	Head and neck cancer (excl. UKB)	Head and neck cancer (excl. UKB) || ||	TRUE	igd	NA	NA	NA	NA	NA	NA	NA	14	69789755	0.0019	2.883e-12	794335	BMI_strict	TRUE	reported	HKLPXU	textfile	2	1	TRUE
	rs3923783	A	C	A	C	-0.0222	-0.0181996	0.1784	0.17813	FALSE	FALSE	FALSE	ieu-b-5123	17	1843189	0.024417	NA	0.456051	HNC_noukb	Head and neck cancer (excl. UKB)	Head and neck cancer (excl. UKB) || ||	TRUE	igd	NA	NA	NA	NA	NA	NA	NA	17	1843189	0.0022	4.121e-23	714524	BMI_strict	TRUE	reported	HKLPXU	textfile	2	1	TRUE
	rs39654	A	G	A	G	-0.0163	-0.0347046	0.4513	0.459026	FALSE	FALSE	FALSE	ieu-b-5123	3	173095123	0.0189888	NA	0.0676052	HNC_noukb	Head and neck cancer (excl. UKB)	Head and neck cancer (excl. UKB) || ||	TRUE	igd	NA	NA	NA	NA	NA	NA	NA	3	173095123	0.0017	1.745e-21	717812	BMI_strict	TRUE	reported	HKLPXU	textfile	2	1	TRUE
	rs40067	A	G	A	G	-0.0252	-0.0318446	0.1701	0.16301	FALSE	FALSE	FALSE	ieu-b-5123	5	107439012	0.0249791	NA	0.202362	HNC_noukb	Head and neck cancer (excl. UKB)	Head and neck cancer (excl. UKB) || ||	TRUE	igd	NA	NA	NA	NA	NA	NA	NA	5	107439012	0.0023	9.728e-29	714059	BMI_strict	TRUE	reported	HKLPXU	textfile	2	1	TRUE
	rs4017425	T	C	T	C	-0.0118	-0.00181666	0.4676	0.467959	FALSE	FALSE	FALSE	ieu-b-5123	3	44028764	0.0184628	NA	0.921618	HNC_noukb	Head and neck cancer (excl. UKB)	Head and neck cancer (excl. UKB) || ||	TRUE	igd	NA	NA	NA	NA	NA	NA	NA	3	44028764	0.0017	2.911e-12	718438	BMI_strict	TRUE	reported	HKLPXU	textfile	2	1	TRUE
	rs4097319	T	G	T	G	0.0107	0.010919	0.5641	0.57512	FALSE	FALSE	FALSE	ieu-b-5123	10	33860515	0.0188223	NA	0.561839	HNC_noukb	Head and neck cancer (excl. UKB)	Head and neck cancer (excl. UKB) || ||	TRUE	igd	NA	NA	NA	NA	NA	NA	NA	10	33860515	0.0017	4.323e-10	718651	BMI_strict	TRUE	reported	HKLPXU	textfile	2	1	TRUE
	rs4148155	A	G	A	G	0.0192	0.0182798	0.8867	0.890449	FALSE	FALSE	FALSE	ieu-b-5123	4	89054667	0.0294638	NA	0.534985	HNC_noukb	Head and neck cancer (excl. UKB)	Head and neck cancer (excl. UKB) || ||	TRUE	igd	NA	NA	NA	NA	NA	NA	NA	4	89054667	0.0026	1.339e-13	806326	BMI_strict	TRUE	reported	HKLPXU	textfile	2	1	TRUE
	rs4240673	T	C	T	C	0.0175	0.00582574	0.4545	0.455644	FALSE	FALSE	FALSE	ieu-b-5123	8	10787612	0.0185011	NA	0.752847	HNC_noukb	Head and neck cancer (excl. UKB)	Head and neck cancer (excl. UKB) || ||	TRUE	igd	NA	NA	NA	NA	NA	NA	NA	8	10787612	0.0016	1.584e-26	806735	BMI_strict	TRUE	reported	HKLPXU	textfile	2	1	TRUE
	rs4256980	C	G	C	G	-0.0187	0.0079355	0.3305	0.353136	FALSE	TRUE	FALSE	ieu-b-5123	11	8673939	0.0193257	NA	0.681353	HNC_noukb	Head and neck cancer (excl. UKB)	Head and neck cancer (excl. UKB) || ||	TRUE	igd	NA	NA	NA	NA	NA	NA	NA	11	8673939	0.0017	8.633e-29	804708	BMI_strict	TRUE	reported	HKLPXU	textfile	2	1	TRUE
	rs427943	A	C	A	C	-0.0177	-0.00618449	0.4288	0.442634	FALSE	FALSE	FALSE	ieu-b-5123	21	46570896	0.0186001	NA	0.739513	HNC_noukb	Head and neck cancer (excl. UKB)	Head and neck cancer (excl. UKB) || ||	TRUE	igd	NA	NA	NA	NA	NA	NA	NA	21	46570896	0.0017	3.603e-25	742360	BMI_strict	TRUE	reported	HKLPXU	textfile	2	1	TRUE
	rs4286488	A	G	A	G	0.0121	0.00406775	0.7608	0.757858	FALSE	FALSE	FALSE	ieu-b-5123	4	94440026	0.021629	NA	0.850822	HNC_noukb	Head and neck cancer (excl. UKB)	Head and neck cancer (excl. UKB) || ||	TRUE	igd	NA	NA	NA	NA	NA	NA	NA	4	94440026	0.002	1.704e-09	718676	BMI_strict	TRUE	reported	HKLPXU	textfile	2	1	TRUE
	rs429358	T	C	T	C	0.0257	-0.0151391	0.8459	0.858328	FALSE	FALSE	FALSE	ieu-b-5123	19	45411941	0.0265637	NA	0.568735	HNC_noukb	Head and neck cancer (excl. UKB)	Head and neck cancer (excl. UKB) || ||	TRUE	igd	NA	NA	NA	NA	NA	NA	NA	19	45411941	0.0026	2.599e-22	484680	BMI_strict	TRUE	reported	HKLPXU	textfile	2	1	TRUE
	rs4303732	T	C	T	C	0.0169	-0.0179878	0.6137	0.604194	FALSE	FALSE	FALSE	ieu-b-5123	2	100830040	0.0188802	NA	0.340723	HNC_noukb	Head and neck cancer (excl. UKB)	Head and neck cancer (excl. UKB) || ||	TRUE	igd	NA	NA	NA	NA	NA	NA	NA	2	100830040	0.0017	1.264e-22	718627	BMI_strict	TRUE	reported	HKLPXU	textfile	2	1	TRUE
	rs4307239	A	G	A	G	-0.0115	-0.0349132	0.5361	0.536852	FALSE	FALSE	FALSE	ieu-b-5123	7	24354300	0.018636	NA	0.0610085	HNC_noukb	Head and neck cancer (excl. UKB)	Head and neck cancer (excl. UKB) || ||	TRUE	igd	NA	NA	NA	NA	NA	NA	NA	7	24354300	0.0017	1.473e-11	717563	BMI_strict	TRUE	reported	HKLPXU	textfile	2	1	TRUE
	rs4482463	A	C	A	C	-0.031	-0.0172988	0.917	0.911916	FALSE	FALSE	FALSE	ieu-b-5123	2	205375909	0.0350707	NA	0.621832	HNC_noukb	Head and neck cancer (excl. UKB)	Head and neck cancer (excl. UKB) || ||	TRUE	igd	NA	NA	NA	NA	NA	NA	NA	2	205375909	0.0031	4.848e-23	663850	BMI_strict	TRUE	reported	HKLPXU	textfile	2	1	TRUE
	rs4517716	C	G	C	G	-0.0117	-0.00751064	0.7924	0.798718	FALSE	TRUE	FALSE	ieu-b-5123	14	83013876	0.0232072	NA	0.746215	HNC_noukb	Head and neck cancer (excl. UKB)	Head and neck cancer (excl. UKB) || ||	TRUE	igd	NA	NA	NA	NA	NA	NA	NA	14	83013876	0.002	4.27e-09	806706	BMI_strict	TRUE	reported	HKLPXU	textfile	2	1	TRUE
	rs45486197	A	G	A	G	0.0279	-0.0469404	0.0635	0.0627832	FALSE	FALSE	FALSE	ieu-b-5123	19	2244849	0.0394007	NA	0.233512	HNC_noukb	Head and neck cancer (excl. UKB)	Head and neck cancer (excl. UKB) || ||	TRUE	igd	NA	NA	NA	NA	NA	NA	NA	19	2244849	0.004	1.801e-12	484680	BMI_strict	TRUE	reported	HKLPXU	textfile	2	1	TRUE
	rs459552	A	T	A	T	-0.0133	0.0113221	0.7747	0.75965	FALSE	TRUE	FALSE	ieu-b-5123	5	112176756	0.0220468	NA	0.607567	HNC_noukb	Head and neck cancer (excl. UKB)	Head and neck cancer (excl. UKB) || ||	TRUE	igd	NA	NA	NA	NA	NA	NA	NA	5	112176756	0.0019	8.356e-12	797086	BMI_strict	TRUE	reported	HKLPXU	textfile	2	1	TRUE
	rs4653017	T	C	T	C	0.0118	-0.0462771	0.6679	0.674083	FALSE	FALSE	FALSE	ieu-b-5123	1	33776728	0.0196851	NA	0.0187297	HNC_noukb	Head and neck cancer (excl. UKB)	Head and neck cancer (excl. UKB) || ||	TRUE	igd	NA	NA	NA	NA	NA	NA	NA	1	33776728	0.0018	1.11e-10	716691	BMI_strict	TRUE	reported	HKLPXU	textfile	2	1	TRUE
	rs4655141	T	C	T	C	-0.0173	-0.0072084	0.8362	0.833551	FALSE	FALSE	FALSE	ieu-b-5123	1	23312025	0.0245174	NA	0.76875	HNC_noukb	Head and neck cancer (excl. UKB)	Head and neck cancer (excl. UKB) || ||	TRUE	igd	NA	NA	NA	NA	NA	NA	NA	1	23312025	0.0022	6.198e-15	718666	BMI_strict	TRUE	reported	HKLPXU	textfile	2	1	TRUE
	rs4700608	T	C	T	C	-0.0155	-0.000205942	0.5236	0.510014	FALSE	FALSE	FALSE	ieu-b-5123	5	63026280	0.0184505	NA	0.991094	HNC_noukb	Head and neck cancer (excl. UKB)	Head and neck cancer (excl. UKB) || ||	TRUE	igd	NA	NA	NA	NA	NA	NA	NA	5	63026280	0.0017	4.324e-20	718693	BMI_strict	TRUE	reported	HKLPXU	textfile	2	1	TRUE
	rs4721089	T	C	T	C	0.0167	0.0134073	0.783	0.769894	FALSE	FALSE	FALSE	ieu-b-5123	7	1872921	0.0220355	NA	0.542895	HNC_noukb	Head and neck cancer (excl. UKB)	Head and neck cancer (excl. UKB) || ||	TRUE	igd	NA	NA	NA	NA	NA	NA	NA	7	1872921	0.0023	5.596e-13	484680	BMI_strict	TRUE	reported	HKLPXU	textfile	2	1	TRUE
	rs4740383	A	G	A	G	0.0131	-0.0375668	0.4185	0.401994	FALSE	FALSE	FALSE	ieu-b-5123	9	133788361	0.0188614	NA	0.0464002	HNC_noukb	Head and neck cancer (excl. UKB)	Head and neck cancer (excl. UKB) || ||	TRUE	igd	TRUE	rs4740383	rs6597652	A	G	A	G	9	133783566	0.0018	7.028e-14	694837	BMI_strict	TRUE	reported	HKLPXU	textfile	2	1	TRUE
	rs4740619	T	C	T	C	0.0189	0.0488363	0.5436	0.559768	FALSE	FALSE	FALSE	ieu-b-5123	9	15634326	0.01859	NA	0.00861351	HNC_noukb	Head and neck cancer (excl. UKB)	Head and neck cancer (excl. UKB) || ||	TRUE	igd	NA	NA	NA	NA	NA	NA	NA	9	15634326	0.0016	3.147e-31	806567	BMI_strict	TRUE	reported	HKLPXU	textfile	2	1	TRUE
	rs474605	A	G	A	G	-0.0125	0.0412966	0.4679	0.487525	FALSE	FALSE	FALSE	ieu-b-5123	18	39612720	0.0185148	NA	0.0257164	HNC_noukb	Head and neck cancer (excl. UKB)	Head and neck cancer (excl. UKB) || ||	TRUE	igd	NA	NA	NA	NA	NA	NA	NA	18	39612720	0.0017	2.717e-13	718363	BMI_strict	TRUE	reported	HKLPXU	textfile	2	1	TRUE
	rs4771218	A	G	A	G	-0.0141	-0.012114	0.6244	0.610848	FALSE	FALSE	FALSE	ieu-b-5123	13	28655311	0.0189395	NA	0.522423	HNC_noukb	Head and neck cancer (excl. UKB)	Head and neck cancer (excl. UKB) || ||	TRUE	igd	NA	NA	NA	NA	NA	NA	NA	13	28655311	0.0018	3.18e-15	717363	BMI_strict	TRUE	reported	HKLPXU	textfile	2	1	TRUE
	rs478707	T	C	T	C	-0.015	-0.00965258	0.2032	0.192063	FALSE	FALSE	FALSE	ieu-b-5123	18	7543207	0.0234838	NA	0.681048	HNC_noukb	Head and neck cancer (excl. UKB)	Head and neck cancer (excl. UKB) || ||	TRUE	igd	NA	NA	NA	NA	NA	NA	NA	18	7543207	0.0024	1.983e-10	484680	BMI_strict	TRUE	reported	HKLPXU	textfile	2	1	TRUE
	rs4812405	A	C	A	C	-0.0202	-0.0299849	0.0763	0.0695721	FALSE	FALSE	FALSE	ieu-b-5123	20	35276585	0.0365776	NA	0.412353	HNC_noukb	Head and neck cancer (excl. UKB)	Head and neck cancer (excl. UKB) || ||	TRUE	igd	NA	NA	NA	NA	NA	NA	NA	20	35276585	0.0033	1.279e-09	706013	BMI_strict	TRUE	reported	HKLPXU	textfile	2	1	TRUE
	rs4813619	T	G	T	G	-0.0106	-0.0438864	0.5305	0.510582	FALSE	FALSE	FALSE	ieu-b-5123	20	2815715	0.0185995	NA	0.0182974	HNC_noukb	Head and neck cancer (excl. UKB)	Head and neck cancer (excl. UKB) || ||	TRUE	igd	NA	NA	NA	NA	NA	NA	NA	20	2815715	0.0018	1.695e-09	664186	BMI_strict	TRUE	reported	HKLPXU	textfile	2	1	TRUE
	rs4858193	T	C	T	C	0.0133	0.0227342	0.7199	0.724063	FALSE	FALSE	FALSE	ieu-b-5123	3	20441050	0.0207108	NA	0.272337	HNC_noukb	Head and neck cancer (excl. UKB)	Head and neck cancer (excl. UKB) || ||	TRUE	igd	NA	NA	NA	NA	NA	NA	NA	3	20441050	0.0019	2.444e-12	718071	BMI_strict	TRUE	reported	HKLPXU	textfile	2	1	TRUE
	rs4864201	T	C	T	C	0.0137	0.0154014	0.3471	0.347182	FALSE	FALSE	FALSE	ieu-b-5123	4	130731284	0.0193668	NA	0.426469	HNC_noukb	Head and neck cancer (excl. UKB)	Head and neck cancer (excl. UKB) || ||	TRUE	igd	NA	NA	NA	NA	NA	NA	NA	4	130731284	0.0017	4.298e-16	806465	BMI_strict	TRUE	reported	HKLPXU	textfile	2	1	TRUE
	rs4880341	T	C	T	C	-0.013	0.0167015	0.5725	0.563982	FALSE	FALSE	FALSE	ieu-b-5123	10	133992689	0.018789	NA	0.374057	HNC_noukb	Head and neck cancer (excl. UKB)	Head and neck cancer (excl. UKB) || ||	TRUE	igd	NA	NA	NA	NA	NA	NA	NA	10	133992689	0.0017	3.059e-14	716038	BMI_strict	TRUE	reported	HKLPXU	textfile	2	1	TRUE
	rs4900714	T	G	T	G	0.015	-0.0109438	0.4776	0.511129	FALSE	FALSE	FALSE	ieu-b-5123	14	47302219	0.0185026	NA	0.554203	HNC_noukb	Head and neck cancer (excl. UKB)	Head and neck cancer (excl. UKB) || ||	TRUE	igd	NA	NA	NA	NA	NA	NA	NA	14	47302219	0.0017	1.001e-18	718662	BMI_strict	TRUE	reported	HKLPXU	textfile	2	1	TRUE
	rs4906263	C	G	C	G	-0.0176	0.00116984	0.6562	0.651802	FALSE	TRUE	FALSE	ieu-b-5123	14	103249127	0.019394	NA	0.951901	HNC_noukb	Head and neck cancer (excl. UKB)	Head and neck cancer (excl. UKB) || ||	TRUE	igd	NA	NA	NA	NA	NA	NA	NA	14	103249127	0.0018	8.106e-23	718534	BMI_strict	TRUE	reported	HKLPXU	textfile	2	1	TRUE
	rs4973618	A	G	A	G	-0.0148	0.0174765	0.6623	0.659162	FALSE	FALSE	FALSE	ieu-b-5123	2	229002620	0.0194753	NA	0.369523	HNC_noukb	Head and neck cancer (excl. UKB)	Head and neck cancer (excl. UKB) || ||	TRUE	igd	NA	NA	NA	NA	NA	NA	NA	2	229002620	0.0018	1.252e-16	706944	BMI_strict	TRUE	reported	HKLPXU	textfile	2	1	TRUE
	rs4981693	A	G	A	G	0.0202	0.00957128	0.7743	0.767909	FALSE	FALSE	FALSE	ieu-b-5123	14	29680331	0.0218008	NA	0.660637	HNC_noukb	Head and neck cancer (excl. UKB)	Head and neck cancer (excl. UKB) || ||	TRUE	igd	NA	NA	NA	NA	NA	NA	NA	14	29680331	0.002	7.894e-24	718593	BMI_strict	TRUE	reported	HKLPXU	textfile	2	1	TRUE
	rs4986044	T	C	T	C	-0.0177	-0.0447874	0.455	0.457486	FALSE	FALSE	FALSE	ieu-b-5123	17	21261560	0.018543	NA	0.0157206	HNC_noukb	Head and neck cancer (excl. UKB)	Head and neck cancer (excl. UKB) || ||	TRUE	igd	NA	NA	NA	NA	NA	NA	NA	17	21261560	0.0016	1.269e-27	802591	BMI_strict	TRUE	reported	HKLPXU	textfile	2	1	TRUE
	rs4988235	A	G	A	G	0.0124	-0.00516271	0.7206	0.655732	FALSE	FALSE	FALSE	ieu-b-5123	2	136608646	0.0215737	NA	0.810869	HNC_noukb	Head and neck cancer (excl. UKB)	Head and neck cancer (excl. UKB) || ||	TRUE	igd	NA	NA	NA	NA	NA	NA	NA	2	136608646	0.0017	7.094e-13	796039	BMI_strict	TRUE	reported	HKLPXU	textfile	2	1	TRUE
	rs543874	A	G	A	G	-0.0479	-0.0206385	0.7786	0.803163	FALSE	FALSE	FALSE	ieu-b-5123	1	177889480	0.0230921	NA	0.371458	HNC_noukb	Head and neck cancer (excl. UKB)	Head and neck cancer (excl. UKB) || ||	TRUE	igd	NA	NA	NA	NA	NA	NA	NA	1	177889480	0.002	3.06e-125	806688	BMI_strict	TRUE	reported	HKLPXU	textfile	2	1	TRUE
	rs56151256	A	C	A	C	0.0166	0.0215732	0.7555	0.756766	FALSE	FALSE	FALSE	ieu-b-5123	15	78024806	0.0216195	NA	0.318347	HNC_noukb	Head and neck cancer (excl. UKB)	Head and neck cancer (excl. UKB) || ||	TRUE	igd	NA	NA	NA	NA	NA	NA	NA	15	78024806	0.0022	6.187e-14	484680	BMI_strict	TRUE	reported	HKLPXU	textfile	2	1	TRUE
	rs56161855	A	T	A	T	-0.0233	-0.00309851	0.8678	0.863251	FALSE	TRUE	FALSE	ieu-b-5123	17	46288649	0.0265985	NA	0.907263	HNC_noukb	Head and neck cancer (excl. UKB)	Head and neck cancer (excl. UKB) || ||	TRUE	igd	NA	NA	NA	NA	NA	NA	NA	17	46288649	0.0028	1.408e-16	484680	BMI_strict	TRUE	reported	HKLPXU	textfile	2	1	TRUE
	rs562664	T	C	T	C	-0.0138	-0.0194873	0.1873	0.195633	FALSE	FALSE	FALSE	ieu-b-5123	11	63823619	0.0233262	NA	0.403479	HNC_noukb	Head and neck cancer (excl. UKB)	Head and neck cancer (excl. UKB) || ||	TRUE	igd	NA	NA	NA	NA	NA	NA	NA	11	63823619	0.0022	4.15e-10	696578	BMI_strict	TRUE	reported	HKLPXU	textfile	2	1	TRUE
	rs570463	A	C	A	C	-0.0121	0.0061244	0.3266	0.312092	FALSE	FALSE	FALSE	ieu-b-5123	11	28739318	0.0199592	NA	0.75896	HNC_noukb	Head and neck cancer (excl. UKB)	Head and neck cancer (excl. UKB) || ||	TRUE	igd	NA	NA	NA	NA	NA	NA	NA	11	28739318	0.0018	4.33e-11	718580	BMI_strict	TRUE	reported	HKLPXU	textfile	2	1	TRUE
	rs57989773	T	C	T	C	-0.0142	0.000191121	0.7576	0.769083	FALSE	FALSE	FALSE	ieu-b-5123	6	100629078	0.0225323	NA	0.993232	HNC_noukb	Head and neck cancer (excl. UKB)	Head and neck cancer (excl. UKB) || ||	TRUE	igd	NA	NA	NA	NA	NA	NA	NA	6	100629078	0.0023	5.63e-10	484680	BMI_strict	TRUE	reported	HKLPXU	textfile	2	1	TRUE
	rs587271	T	C	T	C	0.012	0.00952725	0.69	0.672964	FALSE	FALSE	FALSE	ieu-b-5123	1	54743111	0.0207056	NA	0.645422	HNC_noukb	Head and neck cancer (excl. UKB)	Head and neck cancer (excl. UKB) || ||	TRUE	igd	NA	NA	NA	NA	NA	NA	NA	1	54743111	0.0018	6.208e-11	789324	BMI_strict	TRUE	reported	HKLPXU	textfile	2	1	TRUE
	rs592483	T	C	T	C	-0.0137	0.0192279	0.5933	0.57309	FALSE	FALSE	FALSE	ieu-b-5123	11	69445173	0.0190579	NA	0.313012	HNC_noukb	Head and neck cancer (excl. UKB)	Head and neck cancer (excl. UKB) || ||	TRUE	igd	NA	NA	NA	NA	NA	NA	NA	11	69445173	0.0017	1.525e-16	802791	BMI_strict	TRUE	reported	HKLPXU	textfile	2	1	TRUE
	rs59302296	A	T	A	T	0.0217	0.010627	0.0991	0.10721	FALSE	TRUE	FALSE	ieu-b-5123	3	9507314	0.0300674	NA	0.723757	HNC_noukb	Head and neck cancer (excl. UKB)	Head and neck cancer (excl. UKB) || ||	TRUE	igd	NA	NA	NA	NA	NA	NA	NA	3	9507314	0.0032	9.124e-12	484680	BMI_strict	TRUE	reported	HKLPXU	textfile	2	1	TRUE
	rs6010784	T	C	T	C	0.0106	0.00606561	0.5062	0.495393	FALSE	FALSE	FALSE	ieu-b-5123	20	61540319	0.0183518	NA	0.741008	HNC_noukb	Head and neck cancer (excl. UKB)	Head and neck cancer (excl. UKB) || ||	TRUE	igd	NA	NA	NA	NA	NA	NA	NA	20	61540319	0.0016	6.906e-11	803088	BMI_strict	TRUE	reported	HKLPXU	textfile	2	1	TRUE
	rs61740466	A	G	A	G	-0.0142	0.0174567	0.2346	0.239305	FALSE	FALSE	FALSE	ieu-b-5123	1	19934900	0.0216252	NA	0.419529	HNC_noukb	Head and neck cancer (excl. UKB)	Head and neck cancer (excl. UKB) || ||	TRUE	igd	NA	NA	NA	NA	NA	NA	NA	1	19934900	0.0022	2.24e-10	484680	BMI_strict	TRUE	reported	HKLPXU	textfile	2	1	TRUE
	rs61813324	T	C	T	C	0.0289	0.0310782	0.1312	0.137696	FALSE	FALSE	FALSE	ieu-b-5123	1	156049877	0.0277445	NA	0.262647	HNC_noukb	Head and neck cancer (excl. UKB)	Head and neck cancer (excl. UKB) || ||	TRUE	igd	NA	NA	NA	NA	NA	NA	NA	1	156049877	0.0028	3.196e-24	484680	BMI_strict	TRUE	reported	HKLPXU	textfile	2	1	TRUE
	rs61828641	A	G	A	G	0.0223	-0.0232376	0.1092	0.105293	FALSE	FALSE	FALSE	ieu-b-5123	1	174321997	0.0359186	NA	0.517664	HNC_noukb	Head and neck cancer (excl. UKB)	Head and neck cancer (excl. UKB) || ||	TRUE	igd	NA	NA	NA	NA	NA	NA	NA	1	174321997	0.003	2.492e-13	484680	BMI_strict	TRUE	reported	HKLPXU	textfile	2	1	TRUE
	rs62176243	A	T	A	T	0.0148	0.0401535	0.7571	0.754956	FALSE	TRUE	FALSE	ieu-b-5123	2	166190881	0.02139	NA	0.0604895	HNC_noukb	Head and neck cancer (excl. UKB)	Head and neck cancer (excl. UKB) || ||	TRUE	igd	NA	NA	NA	NA	NA	NA	NA	2	166190881	0.0022	2.411e-11	484680	BMI_strict	TRUE	reported	HKLPXU	textfile	2	1	TRUE
	rs6265	T	C	T	C	-0.0413	-0.00695174	0.1836	0.185789	FALSE	FALSE	FALSE	ieu-b-5123	11	27679916	0.0235346	NA	0.767701	HNC_noukb	Head and neck cancer (excl. UKB)	Head and neck cancer (excl. UKB) || ||	TRUE	igd	NA	NA	NA	NA	NA	NA	NA	11	27679916	0.0021	7.399e-89	806782	BMI_strict	TRUE	reported	HKLPXU	textfile	2	1	TRUE
	rs6443750	T	C	T	C	-0.0152	-0.017468	0.1994	0.204206	FALSE	FALSE	FALSE	ieu-b-5123	3	181329682	0.0248674	NA	0.4824	HNC_noukb	Head and neck cancer (excl. UKB)	Head and neck cancer (excl. UKB) || ||	TRUE	igd	NA	NA	NA	NA	NA	NA	NA	3	181329682	0.0021	7.252e-13	792002	BMI_strict	TRUE	reported	HKLPXU	textfile	2	1	TRUE
	rs6463489	T	C	T	C	0.0167	-0.0167326	0.0959	0.112071	FALSE	FALSE	FALSE	ieu-b-5123	7	5542513	0.0299372	NA	0.576214	HNC_noukb	Head and neck cancer (excl. UKB)	Head and neck cancer (excl. UKB) || ||	TRUE	igd	NA	NA	NA	NA	NA	NA	NA	7	5542513	0.0026	2.504e-10	805923	BMI_strict	TRUE	reported	HKLPXU	textfile	2	1	TRUE
	rs6468266	A	T	A	T	-0.0113	0.0145798	0.4176	0.393744	FALSE	TRUE	FALSE	ieu-b-5123	8	34380276	0.0188022	NA	0.438088	HNC_noukb	Head and neck cancer (excl. UKB)	Head and neck cancer (excl. UKB) || ||	TRUE	igd	NA	NA	NA	NA	NA	NA	NA	8	34380276	0.0017	7.708e-11	718278	BMI_strict	TRUE	reported	HKLPXU	textfile	2	1	TRUE
	rs6493498	T	C	T	C	0.0137	-0.0234028	0.4465	0.445321	FALSE	FALSE	FALSE	ieu-b-5123	15	51754451	0.0186499	NA	0.209532	HNC_noukb	Head and neck cancer (excl. UKB)	Head and neck cancer (excl. UKB) || ||	TRUE	igd	NA	NA	NA	NA	NA	NA	NA	15	51754451	0.0016	4.838e-17	805967	BMI_strict	TRUE	reported	HKLPXU	textfile	2	1	TRUE
	rs6496248	A	T	A	T	0.0104	0.0112941	0.6352	0.623597	FALSE	TRUE	FALSE	ieu-b-5123	15	98262923	0.0190973	NA	0.554255	HNC_noukb	Head and neck cancer (excl. UKB)	Head and neck cancer (excl. UKB) || ||	TRUE	igd	NA	NA	NA	NA	NA	NA	NA	15	98262923	0.0018	2.929e-09	717972	BMI_strict	TRUE	reported	HKLPXU	textfile	2	1	TRUE
	rs6500208	A	G	A	G	0.0146	-0.0300882	0.2021	0.204211	FALSE	FALSE	FALSE	ieu-b-5123	16	49011249	0.0231232	NA	0.193186	HNC_noukb	Head and neck cancer (excl. UKB)	Head and neck cancer (excl. UKB) || ||	TRUE	igd	NA	NA	NA	NA	NA	NA	NA	16	49011249	0.002	3.211e-13	794515	BMI_strict	TRUE	reported	HKLPXU	textfile	2	1	TRUE
	rs650198	T	C	T	C	-0.0137	-0.01711	0.7294	0.711177	FALSE	FALSE	FALSE	ieu-b-5123	12	69674595	0.0206067	NA	0.406362	HNC_noukb	Head and neck cancer (excl. UKB)	Head and neck cancer (excl. UKB) || ||	TRUE	igd	NA	NA	NA	NA	NA	NA	NA	12	69674595	0.0019	6.425e-13	714521	BMI_strict	TRUE	reported	HKLPXU	textfile	2	1	TRUE
	rs6512302	C	G	C	G	0.0134	-0.0185158	0.7391	0.739913	FALSE	TRUE	FALSE	ieu-b-5123	20	62691550	0.0215506	NA	0.390242	HNC_noukb	Head and neck cancer (excl. UKB)	Head and neck cancer (excl. UKB) || ||	TRUE	igd	NA	NA	NA	NA	NA	NA	NA	20	62691550	0.002	1.522e-11	718338	BMI_strict	TRUE	reported	HKLPXU	textfile	2	1	TRUE
	rs6539064	C	G	C	G	0.0194	-0.0179088	0.7468	0.746748	FALSE	TRUE	FALSE	ieu-b-5123	12	103706754	0.0211171	NA	0.396397	HNC_noukb	Head and neck cancer (excl. UKB)	Head and neck cancer (excl. UKB) || ||	TRUE	igd	NA	NA	NA	NA	NA	NA	NA	12	103706754	0.0019	1.135e-23	718487	BMI_strict	TRUE	reported	HKLPXU	textfile	2	1	TRUE
	rs6545714	A	G	A	G	-0.0194	-0.00464602	0.6112	0.599954	FALSE	FALSE	FALSE	ieu-b-5123	2	59307725	0.0189191	NA	0.806013	HNC_noukb	Head and neck cancer (excl. UKB)	Head and neck cancer (excl. UKB) || ||	TRUE	igd	NA	NA	NA	NA	NA	NA	NA	2	59307725	0.0016	4.013e-32	806783	BMI_strict	TRUE	reported	HKLPXU	textfile	2	1	TRUE
	rs6556301	T	G	T	G	-0.0113	-0.029388	0.3707	0.363968	FALSE	FALSE	FALSE	ieu-b-5123	5	176527577	0.0191545	NA	0.124967	HNC_noukb	Head and neck cancer (excl. UKB)	Head and neck cancer (excl. UKB) || ||	TRUE	igd	NA	NA	NA	NA	NA	NA	NA	5	176527577	0.0017	8.137e-11	767716	BMI_strict	TRUE	reported	HKLPXU	textfile	2	1	TRUE
	rs6567160	T	C	T	C	-0.0552	0.0137161	0.7518	0.766367	FALSE	FALSE	FALSE	ieu-b-5123	18	57829135	0.0217781	NA	0.528817	HNC_noukb	Head and neck cancer (excl. UKB)	Head and neck cancer (excl. UKB) || ||	TRUE	igd	NA	NA	NA	NA	NA	NA	NA	18	57829135	0.0019	7.82e-184	806638	BMI_strict	TRUE	reported	HKLPXU	textfile	2	1	TRUE
	rs657452	A	G	A	G	0.0188	0.0419167	0.4042	0.391516	FALSE	FALSE	FALSE	ieu-b-5123	1	49589847	0.0188961	NA	0.0265357	HNC_noukb	Head and neck cancer (excl. UKB)	Head and neck cancer (excl. UKB) || ||	TRUE	igd	NA	NA	NA	NA	NA	NA	NA	1	49589847	0.0016	3.172e-30	798331	BMI_strict	TRUE	reported	HKLPXU	textfile	2	1	TRUE
	rs6591407	A	C	A	C	-0.0124	-0.00235748	0.1984	0.191164	FALSE	FALSE	FALSE	ieu-b-5123	11	56914157	0.0234489	NA	0.919918	HNC_noukb	Head and neck cancer (excl. UKB)	Head and neck cancer (excl. UKB) || ||	TRUE	igd	NA	NA	NA	NA	NA	NA	NA	11	56914157	0.0021	3.583e-09	806782	BMI_strict	TRUE	reported	HKLPXU	textfile	2	1	TRUE
	rs6607337	T	C	T	C	-0.0124	-0.00956087	0.2978	0.292434	FALSE	FALSE	FALSE	ieu-b-5123	17	35057373	0.0206289	NA	0.643028	HNC_noukb	Head and neck cancer (excl. UKB)	Head and neck cancer (excl. UKB) || ||	TRUE	igd	NA	NA	NA	NA	NA	NA	NA	17	35057373	0.0019	2.548e-11	718656	BMI_strict	TRUE	reported	HKLPXU	textfile	2	1	TRUE
	rs6656785	A	G	A	G	-0.0178	-0.00611723	0.6125	0.620751	FALSE	FALSE	FALSE	ieu-b-5123	1	75005776	0.019194	NA	0.749949	HNC_noukb	Head and neck cancer (excl. UKB)	Head and neck cancer (excl. UKB) || ||	TRUE	igd	NA	NA	NA	NA	NA	NA	NA	1	75005776	0.0016	3.056e-27	806090	BMI_strict	TRUE	reported	HKLPXU	textfile	2	1	TRUE
	rs66595146	A	C	A	C	0.0135	0.0230823	0.6291	0.62316	FALSE	FALSE	FALSE	ieu-b-5123	18	58204315	0.0189955	NA	0.22431	HNC_noukb	Head and neck cancer (excl. UKB)	Head and neck cancer (excl. UKB) || ||	TRUE	igd	NA	NA	NA	NA	NA	NA	NA	18	58204315	0.002	9.093e-12	484680	BMI_strict	TRUE	reported	HKLPXU	textfile	2	1	TRUE
	rs6661316	T	C	T	C	0.012	0.00955375	0.5893	0.572229	FALSE	FALSE	FALSE	ieu-b-5123	1	210095527	0.0187193	NA	0.609792	HNC_noukb	Head and neck cancer (excl. UKB)	Head and neck cancer (excl. UKB) || ||	TRUE	igd	NA	NA	NA	NA	NA	NA	NA	1	210095527	0.0016	1.721e-13	806610	BMI_strict	TRUE	reported	HKLPXU	textfile	2	1	TRUE
	rs6696828	C	G	C	G	0.012	0.0134316	0.2976	0.298659	FALSE	TRUE	FALSE	ieu-b-5123	1	80812020	0.020178	NA	0.505633	HNC_noukb	Head and neck cancer (excl. UKB)	Head and neck cancer (excl. UKB) || ||	TRUE	igd	NA	NA	NA	NA	NA	NA	NA	1	80812020	0.0018	6.415e-11	718664	BMI_strict	TRUE	reported	HKLPXU	textfile	2	1	TRUE
	rs6716898	A	G	A	G	0.0127	0.0391446	0.4873	0.489856	FALSE	FALSE	FALSE	ieu-b-5123	2	198944271	0.0185284	NA	0.0346282	HNC_noukb	Head and neck cancer (excl. UKB)	Head and neck cancer (excl. UKB) || ||	TRUE	igd	NA	NA	NA	NA	NA	NA	NA	2	198944271	0.0019	2.33e-11	484680	BMI_strict	TRUE	reported	HKLPXU	textfile	2	1	TRUE
	rs6720868	T	C	T	C	0.0154	-0.0154518	0.3083	0.319451	FALSE	FALSE	FALSE	ieu-b-5123	2	230663576	0.019857	NA	0.436479	HNC_noukb	Head and neck cancer (excl. UKB)	Head and neck cancer (excl. UKB) || ||	TRUE	igd	NA	NA	NA	NA	NA	NA	NA	2	230663576	0.0018	1.824e-17	718504	BMI_strict	TRUE	reported	HKLPXU	textfile	2	1	TRUE
	rs6725931	T	C	T	C	0.0187	0.034835	0.8483	0.842025	FALSE	FALSE	FALSE	ieu-b-5123	2	220205146	0.0264546	NA	0.18791	HNC_noukb	Head and neck cancer (excl. UKB)	Head and neck cancer (excl. UKB) || ||	TRUE	igd	NA	NA	NA	NA	NA	NA	NA	2	220205146	0.0024	2.297e-15	718689	BMI_strict	TRUE	reported	HKLPXU	textfile	2	1	TRUE
	rs6804842	A	G	A	G	-0.0141	0.0188502	0.4301	0.422677	FALSE	FALSE	FALSE	ieu-b-5123	3	25106437	0.0185863	NA	0.310488	HNC_noukb	Head and neck cancer (excl. UKB)	Head and neck cancer (excl. UKB) || ||	TRUE	igd	NA	NA	NA	NA	NA	NA	NA	3	25106437	0.0016	7.57e-18	806143	BMI_strict	TRUE	reported	HKLPXU	textfile	2	1	TRUE
	rs6808814	T	C	T	C	0.0118	-0.00325229	0.7335	0.741261	FALSE	FALSE	FALSE	ieu-b-5123	3	116852469	0.0211452	NA	0.877762	HNC_noukb	Head and neck cancer (excl. UKB)	Head and neck cancer (excl. UKB) || ||	TRUE	igd	NA	NA	NA	NA	NA	NA	NA	3	116852469	0.0019	1.305e-09	718249	BMI_strict	TRUE	reported	HKLPXU	textfile	2	1	TRUE
	rs6850421	A	G	A	G	0.0113	-0.0111185	0.4564	0.46966	FALSE	FALSE	FALSE	ieu-b-5123	4	180187034	0.0185743	NA	0.549442	HNC_noukb	Head and neck cancer (excl. UKB)	Head and neck cancer (excl. UKB) || ||	TRUE	igd	NA	NA	NA	NA	NA	NA	NA	4	180187034	0.0019	3.657e-09	484680	BMI_strict	TRUE	reported	HKLPXU	textfile	2	1	TRUE
	rs6864049	A	G	A	G	-0.0121	-0.0208668	0.489	0.475011	FALSE	FALSE	FALSE	ieu-b-5123	5	124330522	0.0184638	NA	0.258415	HNC_noukb	Head and neck cancer (excl. UKB)	Head and neck cancer (excl. UKB) || ||	TRUE	igd	NA	NA	NA	NA	NA	NA	NA	5	124330522	0.0016	1.475e-13	806604	BMI_strict	TRUE	reported	HKLPXU	textfile	2	1	TRUE
	rs687339	T	C	T	C	0.0188	0.0361311	0.7697	0.778674	FALSE	FALSE	FALSE	ieu-b-5123	3	135932359	0.0223506	NA	0.105974	HNC_noukb	Head and neck cancer (excl. UKB)	Head and neck cancer (excl. UKB) || ||	TRUE	igd	NA	NA	NA	NA	NA	NA	NA	3	135932359	0.0019	4.317e-22	806723	BMI_strict	TRUE	reported	HKLPXU	textfile	2	1	TRUE
	rs6882366	T	C	T	C	-0.0131	-0.000134775	0.3959	0.387512	FALSE	FALSE	FALSE	ieu-b-5123	5	95864693	0.0190026	NA	0.994341	HNC_noukb	Head and neck cancer (excl. UKB)	Head and neck cancer (excl. UKB) || ||	TRUE	igd	NA	NA	NA	NA	NA	NA	NA	5	95864693	0.0017	4.387e-14	718668	BMI_strict	TRUE	reported	HKLPXU	textfile	2	1	TRUE
	rs6886072	T	C	T	C	-0.01	0.00104055	0.4665	0.477547	FALSE	FALSE	FALSE	ieu-b-5123	5	136598460	0.0185141	NA	0.95518	HNC_noukb	Head and neck cancer (excl. UKB)	Head and neck cancer (excl. UKB) || ||	TRUE	igd	NA	NA	NA	NA	NA	NA	NA	5	136598460	0.0017	4.125e-09	718327	BMI_strict	TRUE	reported	HKLPXU	textfile	2	1	TRUE
	rs6890310	A	G	A	G	-0.0119	0.00151756	0.2923	0.281698	FALSE	FALSE	FALSE	ieu-b-5123	5	27193573	0.0205303	NA	0.941076	HNC_noukb	Head and neck cancer (excl. UKB)	Head and neck cancer (excl. UKB) || ||	TRUE	igd	NA	NA	NA	NA	NA	NA	NA	5	27193573	0.0019	3.287e-10	718622	BMI_strict	TRUE	reported	HKLPXU	textfile	2	1	TRUE
	rs6893539	A	C	A	C	-0.0122	-0.00825601	0.6981	0.702293	FALSE	FALSE	FALSE	ieu-b-5123	5	122705737	0.0203123	NA	0.684409	HNC_noukb	Head and neck cancer (excl. UKB)	Head and neck cancer (excl. UKB) || ||	TRUE	igd	NA	NA	NA	NA	NA	NA	NA	5	122705737	0.0019	6.165e-11	718648	BMI_strict	TRUE	reported	HKLPXU	textfile	2	1	TRUE
	rs6909685	T	C	T	C	-0.0149	0.00768629	0.3295	0.323093	FALSE	FALSE	FALSE	ieu-b-5123	6	97753952	0.0198063	NA	0.697961	HNC_noukb	Head and neck cancer (excl. UKB)	Head and neck cancer (excl. UKB) || ||	TRUE	igd	NA	NA	NA	NA	NA	NA	NA	6	97753952	0.0018	2.782e-16	717696	BMI_strict	TRUE	reported	HKLPXU	textfile	2	1	TRUE
	rs6922607	A	G	A	G	-0.013	-0.0552112	0.808	0.808249	FALSE	FALSE	FALSE	ieu-b-5123	6	142703483	0.0233322	NA	0.0179664	HNC_noukb	Head and neck cancer (excl. UKB)	Head and neck cancer (excl. UKB) || ||	TRUE	igd	NA	NA	NA	NA	NA	NA	NA	6	142703483	0.0022	1.851e-09	706729	BMI_strict	TRUE	reported	HKLPXU	textfile	2	1	TRUE
	rs6950388	A	G	A	G	0.0135	0.0342705	0.7782	0.765984	FALSE	FALSE	FALSE	ieu-b-5123	7	1270699	0.0245426	NA	0.162604	HNC_noukb	Head and neck cancer (excl. UKB)	Head and neck cancer (excl. UKB) || ||	TRUE	igd	NA	NA	NA	NA	NA	NA	NA	7	1270699	0.0022	1.588e-09	484680	BMI_strict	TRUE	reported	HKLPXU	textfile	2	1	TRUE
	rs698147	A	G	A	G	0.0116	0.000946009	0.447	0.460764	FALSE	FALSE	FALSE	ieu-b-5123	5	3513485	0.0184737	NA	0.959159	HNC_noukb	Head and neck cancer (excl. UKB)	Head and neck cancer (excl. UKB) || ||	TRUE	igd	NA	NA	NA	NA	NA	NA	NA	5	3513485	0.0017	9.672e-12	716805	BMI_strict	TRUE	reported	HKLPXU	textfile	2	1	TRUE
	rs7024334	T	G	T	G	0.0135	0.0111835	0.2254	0.231799	FALSE	FALSE	FALSE	ieu-b-5123	9	109072075	0.0221785	NA	0.614086	HNC_noukb	Head and neck cancer (excl. UKB)	Head and neck cancer (excl. UKB) || ||	TRUE	igd	NA	NA	NA	NA	NA	NA	NA	9	109072075	0.002	4.708e-12	799813	BMI_strict	TRUE	reported	HKLPXU	textfile	2	1	TRUE
	rs7025938	C	G	C	G	-0.0162	-0.0121332	0.6798	0.676536	FALSE	TRUE	FALSE	ieu-b-5123	9	103088321	0.0197323	NA	0.538624	HNC_noukb	Head and neck cancer (excl. UKB)	Head and neck cancer (excl. UKB) || ||	TRUE	igd	NA	NA	NA	NA	NA	NA	NA	9	103088321	0.0018	1.47e-19	717817	BMI_strict	TRUE	reported	HKLPXU	textfile	2	1	TRUE
	rs7070670	T	C	T	C	-0.0126	-0.00377412	0.3228	0.317534	FALSE	FALSE	FALSE	ieu-b-5123	10	61842645	0.0200282	NA	0.850532	HNC_noukb	Head and neck cancer (excl. UKB)	Head and neck cancer (excl. UKB) || ||	TRUE	igd	NA	NA	NA	NA	NA	NA	NA	10	61842645	0.0021	7.143e-10	484680	BMI_strict	TRUE	reported	HKLPXU	textfile	2	1	TRUE
	rs7084454	A	G	A	G	0.0198	-0.00512853	0.3086	0.330065	FALSE	FALSE	FALSE	ieu-b-5123	10	21821274	0.0195707	NA	0.793281	HNC_noukb	Head and neck cancer (excl. UKB)	Head and neck cancer (excl. UKB) || ||	TRUE	igd	NA	NA	NA	NA	NA	NA	NA	10	21821274	0.0018	4.505e-27	706792	BMI_strict	TRUE	reported	HKLPXU	textfile	2	1	TRUE
	rs7102454	T	C	T	C	-0.0168	-0.0254129	0.6437	0.649675	FALSE	FALSE	FALSE	ieu-b-5123	11	65594820	0.0193072	NA	0.188093	HNC_noukb	Head and neck cancer (excl. UKB)	Head and neck cancer (excl. UKB) || ||	TRUE	igd	NA	NA	NA	NA	NA	NA	NA	11	65594820	0.0018	3.839e-21	718609	BMI_strict	TRUE	reported	HKLPXU	textfile	2	1	TRUE
	rs7124681	A	C	A	C	0.0257	-0.0319429	0.4162	0.40833	FALSE	FALSE	FALSE	ieu-b-5123	11	47529947	0.0191434	NA	0.0951941	HNC_noukb	Head and neck cancer (excl. UKB)	Head and neck cancer (excl. UKB) || ||	TRUE	igd	NA	NA	NA	NA	NA	NA	NA	11	47529947	0.0016	3.956e-55	806656	BMI_strict	TRUE	reported	HKLPXU	textfile	2	1	TRUE
	rs7138803	A	G	A	G	0.0297	-0.0436833	0.387	0.372526	FALSE	FALSE	FALSE	ieu-b-5123	12	50247468	0.0190694	NA	0.0219781	HNC_noukb	Head and neck cancer (excl. UKB)	Head and neck cancer (excl. UKB) || ||	TRUE	igd	NA	NA	NA	NA	NA	NA	NA	12	50247468	0.0017	3.095e-71	806772	BMI_strict	TRUE	reported	HKLPXU	textfile	2	1	TRUE
	rs7144011	T	G	T	G	0.0263	-0.00998948	0.2334	0.219931	FALSE	FALSE	FALSE	ieu-b-5123	14	79940383	0.0221369	NA	0.651802	HNC_noukb	Head and neck cancer (excl. UKB)	Head and neck cancer (excl. UKB) || ||	TRUE	igd	NA	NA	NA	NA	NA	NA	NA	14	79940383	0.002	2.374e-40	806721	BMI_strict	TRUE	reported	HKLPXU	textfile	2	1	TRUE
	rs7161194	A	G	A	G	0.019	-0.0187389	0.3437	0.347233	FALSE	FALSE	FALSE	ieu-b-5123	14	101529005	0.0207106	NA	0.365574	HNC_noukb	Head and neck cancer (excl. UKB)	Head and neck cancer (excl. UKB) || ||	TRUE	igd	NA	NA	NA	NA	NA	NA	NA	14	101529005	0.0019	2.23e-24	773952	BMI_strict	TRUE	reported	HKLPXU	textfile	2	1	TRUE
	rs7171864	A	G	A	G	0.0132	-0.00895891	0.6935	0.662468	FALSE	FALSE	FALSE	ieu-b-5123	15	73227249	0.019676	NA	0.648878	HNC_noukb	Head and neck cancer (excl. UKB)	Head and neck cancer (excl. UKB) || ||	TRUE	igd	NA	NA	NA	NA	NA	NA	NA	15	73227249	0.0017	2.6e-14	806698	BMI_strict	TRUE	reported	HKLPXU	textfile	2	1	TRUE
	rs7172627	A	G	A	G	-0.0114	-0.00378226	0.523	0.530891	FALSE	FALSE	FALSE	ieu-b-5123	15	31877690	0.0184556	NA	0.83762	HNC_noukb	Head and neck cancer (excl. UKB)	Head and neck cancer (excl. UKB) || ||	TRUE	igd	NA	NA	NA	NA	NA	NA	NA	15	31877690	0.0017	1.813e-11	718111	BMI_strict	TRUE	reported	HKLPXU	textfile	2	1	TRUE
	rs7206608	C	G	C	G	-0.013	-0.00230017	0.6751	0.680316	FALSE	TRUE	FALSE	ieu-b-5123	16	82872628	0.0198186	NA	0.907604	HNC_noukb	Head and neck cancer (excl. UKB)	Head and neck cancer (excl. UKB) || ||	TRUE	igd	NA	NA	NA	NA	NA	NA	NA	16	82872628	0.0018	1.202e-12	717196	BMI_strict	TRUE	reported	HKLPXU	textfile	2	1	TRUE
	rs7206790	C	G	C	G	-0.0606	0.0180743	0.5232	0.536067	FALSE	TRUE	TRUE	ieu-b-5123	16	53797908	0.0187291	NA	0.334526	HNC_noukb	Head and neck cancer (excl. UKB)	Head and neck cancer (excl. UKB) || ||	TRUE	igd	NA	NA	NA	NA	NA	NA	NA	16	53797908	0.0017	1e-200	802720	BMI_strict	TRUE	reported	HKLPXU	textfile	2	1	FALSE
	rs7258722	A	T	A	T	-0.02	-0.0347201	0.4131	0.400631	FALSE	TRUE	FALSE	ieu-b-5123	19	18811966	0.0188154	NA	0.0649935	HNC_noukb	Head and neck cancer (excl. UKB)	Head and neck cancer (excl. UKB) || ||	TRUE	igd	TRUE	rs7258722	rs4808844	A	T	G	A	19	18808915	0.0017	1.806e-30	717923	BMI_strict	TRUE	reported	HKLPXU	textfile	2	1	TRUE
	rs72649373	T	C	T	C	-0.0167	-0.00927243	0.8619	0.859662	FALSE	FALSE	FALSE	ieu-b-5123	4	80609966	0.0267057	NA	0.728435	HNC_noukb	Head and neck cancer (excl. UKB)	Head and neck cancer (excl. UKB) || ||	TRUE	igd	NA	NA	NA	NA	NA	NA	NA	4	80609966	0.0028	3.203e-09	484680	BMI_strict	TRUE	reported	HKLPXU	textfile	2	1	TRUE
	rs72673947	A	G	A	G	-0.0223	0.0424155	0.8902	0.885307	FALSE	FALSE	FALSE	ieu-b-5123	8	118895013	0.0288856	NA	0.141997	HNC_noukb	Head and neck cancer (excl. UKB)	Head and neck cancer (excl. UKB) || ||	TRUE	igd	TRUE	rs72673947	rs12541851	G	A	T	C	8	118884379	0.0031	4.106e-13	484680	BMI_strict	TRUE	reported	HKLPXU	textfile	2	1	TRUE
	rs72757415	T	G	T	G	-0.0159	0.00743778	0.2123	0.214681	FALSE	FALSE	FALSE	ieu-b-5123	15	92574062	0.0228255	NA	0.744535	HNC_noukb	Head and neck cancer (excl. UKB)	Head and neck cancer (excl. UKB) || ||	TRUE	igd	TRUE	rs72757415	rs58431213	T	G	A	G	15	92572762	0.0023	1.337e-11	484680	BMI_strict	TRUE	reported	HKLPXU	textfile	2	1	TRUE
	rs73213484	A	T	A	T	0.0208	-0.0321096	0.8565	0.851842	FALSE	TRUE	FALSE	ieu-b-5123	4	28489339	0.0258289	NA	0.213807	HNC_noukb	Head and neck cancer (excl. UKB)	Head and neck cancer (excl. UKB) || ||	TRUE	igd	NA	NA	NA	NA	NA	NA	NA	4	28489339	0.0027	2.043e-14	484680	BMI_strict	TRUE	reported	HKLPXU	textfile	2	1	TRUE
	rs7323	C	G	C	G	-0.0166	0.000178546	0.268	0.274334	FALSE	TRUE	FALSE	ieu-b-5123	13	28009031	0.0207096	NA	0.993121	HNC_noukb	Head and neck cancer (excl. UKB)	Head and neck cancer (excl. UKB) || ||	TRUE	igd	NA	NA	NA	NA	NA	NA	NA	13	28009031	0.0019	2.179e-18	718060	BMI_strict	TRUE	reported	HKLPXU	textfile	2	1	TRUE
	rs7357754	A	G	A	G	-0.012	0.00910013	0.4985	0.501839	FALSE	FALSE	FALSE	ieu-b-5123	9	92207308	0.0184	NA	0.620902	HNC_noukb	Head and neck cancer (excl. UKB)	Head and neck cancer (excl. UKB) || ||	TRUE	igd	NA	NA	NA	NA	NA	NA	NA	9	92207308	0.0017	1.814e-12	718167	BMI_strict	TRUE	reported	HKLPXU	textfile	2	1	TRUE
	rs73985439	A	C	A	C	-0.0131	0.0151356	0.6914	0.694082	FALSE	FALSE	FALSE	ieu-b-5123	2	212299249	0.0200179	NA	0.449586	HNC_noukb	Head and neck cancer (excl. UKB)	Head and neck cancer (excl. UKB) || ||	TRUE	igd	NA	NA	NA	NA	NA	NA	NA	2	212299249	0.0021	1.839e-10	484680	BMI_strict	TRUE	reported	HKLPXU	textfile	2	1	TRUE
	rs742748	T	C	T	C	-0.0113	-0.0229207	0.5864	0.585933	FALSE	FALSE	FALSE	ieu-b-5123	20	39293397	0.0187812	NA	0.222309	HNC_noukb	Head and neck cancer (excl. UKB)	Head and neck cancer (excl. UKB) || ||	TRUE	igd	NA	NA	NA	NA	NA	NA	NA	20	39293397	0.0017	1.13e-11	805145	BMI_strict	TRUE	reported	HKLPXU	textfile	2	1	TRUE
	rs7498665	A	G	A	G	-0.0285	0.027976	0.6179	0.59974	FALSE	FALSE	FALSE	ieu-b-5123	16	28883241	0.019061	NA	0.142182	HNC_noukb	Head and neck cancer (excl. UKB)	Head and neck cancer (excl. UKB) || ||	TRUE	igd	NA	NA	NA	NA	NA	NA	NA	16	28883241	0.0017	1.139e-66	804216	BMI_strict	TRUE	reported	HKLPXU	textfile	2	1	TRUE
	rs750090	T	C	T	C	0.0113	0.0251566	0.6258	0.641849	FALSE	FALSE	FALSE	ieu-b-5123	4	152931436	0.0192054	NA	0.190239	HNC_noukb	Head and neck cancer (excl. UKB)	Head and neck cancer (excl. UKB) || ||	TRUE	igd	NA	NA	NA	NA	NA	NA	NA	4	152931436	0.0018	2.496e-10	718676	BMI_strict	TRUE	reported	HKLPXU	textfile	2	1	TRUE
	rs7534091	A	G	A	G	-0.012	-0.0105062	0.7182	0.743283	FALSE	FALSE	FALSE	ieu-b-5123	1	118864616	0.021162	NA	0.619565	HNC_noukb	Head and neck cancer (excl. UKB)	Head and neck cancer (excl. UKB) || ||	TRUE	igd	NA	NA	NA	NA	NA	NA	NA	1	118864616	0.0018	6.65e-11	803017	BMI_strict	TRUE	reported	HKLPXU	textfile	2	1	TRUE
	rs7561278	T	C	T	C	0.0169	-0.010228	0.7668	0.783217	FALSE	FALSE	FALSE	ieu-b-5123	2	48954905	0.0225106	NA	0.649569	HNC_noukb	Head and neck cancer (excl. UKB)	Head and neck cancer (excl. UKB) || ||	TRUE	igd	NA	NA	NA	NA	NA	NA	NA	2	48954905	0.0021	4.89e-16	717019	BMI_strict	TRUE	reported	HKLPXU	textfile	2	1	TRUE
	rs756717	A	G	A	G	-0.0134	-0.0189184	0.394	0.396905	FALSE	FALSE	FALSE	ieu-b-5123	16	72996162	0.0191784	NA	0.323916	HNC_noukb	Head and neck cancer (excl. UKB)	Head and neck cancer (excl. UKB) || ||	TRUE	igd	NA	NA	NA	NA	NA	NA	NA	16	72996162	0.0017	2.383e-15	804190	BMI_strict	TRUE	reported	HKLPXU	textfile	2	1	TRUE
	rs7568228	C	G	C	G	-0.0104	0.0200133	0.5401	0.508614	FALSE	TRUE	TRUE	ieu-b-5123	2	236848488	0.0188345	NA	0.287969	HNC_noukb	Head and neck cancer (excl. UKB)	Head and neck cancer (excl. UKB) || ||	TRUE	igd	NA	NA	NA	NA	NA	NA	NA	2	236848488	0.0017	1.004e-09	712598	BMI_strict	TRUE	reported	HKLPXU	textfile	2	1	FALSE
	rs7588437	A	G	A	G	-0.0165	0.0367112	0.3664	0.363706	FALSE	FALSE	FALSE	ieu-b-5123	2	181575281	0.019158	NA	0.055335	HNC_noukb	Head and neck cancer (excl. UKB)	Head and neck cancer (excl. UKB) || ||	TRUE	igd	NA	NA	NA	NA	NA	NA	NA	2	181575281	0.0017	2.321e-22	806379	BMI_strict	TRUE	reported	HKLPXU	textfile	2	1	TRUE
	rs7593917	A	G	A	G	-0.0115	-0.0173589	0.4535	0.425419	FALSE	FALSE	FALSE	ieu-b-5123	2	203944028	0.0188036	NA	0.355919	HNC_noukb	Head and neck cancer (excl. UKB)	Head and neck cancer (excl. UKB) || ||	TRUE	igd	TRUE	rs7593917	rs11690927	A	G	A	G	2	203931012	0.0016	9.671e-13	799252	BMI_strict	TRUE	reported	HKLPXU	textfile	2	1	TRUE
	rs7599312	A	G	A	G	-0.0182	-0.0490073	0.2737	0.267114	FALSE	FALSE	FALSE	ieu-b-5123	2	213413231	0.0208512	NA	0.0187564	HNC_noukb	Head and neck cancer (excl. UKB)	Head and neck cancer (excl. UKB) || ||	TRUE	igd	NA	NA	NA	NA	NA	NA	NA	2	213413231	0.0018	1.521e-23	806704	BMI_strict	TRUE	reported	HKLPXU	textfile	2	1	TRUE
	rs7616009	A	G	A	G	-0.0157	-0.0127351	0.1595	0.147466	FALSE	FALSE	FALSE	ieu-b-5123	3	194881756	0.0259766	NA	0.623955	HNC_noukb	Head and neck cancer (excl. UKB)	Head and neck cancer (excl. UKB) || ||	TRUE	igd	NA	NA	NA	NA	NA	NA	NA	3	194881756	0.0024	4.331e-11	718569	BMI_strict	TRUE	reported	HKLPXU	textfile	2	1	TRUE
	rs7631156	A	G	A	G	0.0215	-0.0298907	0.3091	0.315755	FALSE	FALSE	FALSE	ieu-b-5123	3	131751628	0.019824	NA	0.131604	HNC_noukb	Head and neck cancer (excl. UKB)	Head and neck cancer (excl. UKB) || ||	TRUE	igd	NA	NA	NA	NA	NA	NA	NA	3	131751628	0.0018	3.329e-32	718695	BMI_strict	TRUE	reported	HKLPXU	textfile	2	1	TRUE
	rs7640424	T	C	T	C	-0.0135	-0.0431819	0.3106	0.298542	FALSE	FALSE	FALSE	ieu-b-5123	3	107820063	0.0202108	NA	0.0326317	HNC_noukb	Head and neck cancer (excl. UKB)	Head and neck cancer (excl. UKB) || ||	TRUE	igd	NA	NA	NA	NA	NA	NA	NA	3	107820063	0.0018	1.226e-14	805792	BMI_strict	TRUE	reported	HKLPXU	textfile	2	1	TRUE
	rs765875	T	C	T	C	-0.0132	-0.0159141	0.4689	0.483352	FALSE	FALSE	FALSE	ieu-b-5123	6	143185683	0.0184331	NA	0.387951	HNC_noukb	Head and neck cancer (excl. UKB)	Head and neck cancer (excl. UKB) || ||	TRUE	igd	NA	NA	NA	NA	NA	NA	NA	6	143185683	0.0017	1.077e-14	718653	BMI_strict	TRUE	reported	HKLPXU	textfile	2	1	TRUE
	rs7678054	A	G	A	G	-0.0099	0.00442736	0.4788	0.471869	FALSE	FALSE	FALSE	ieu-b-5123	4	95093855	0.0184742	NA	0.810601	HNC_noukb	Head and neck cancer (excl. UKB)	Head and neck cancer (excl. UKB) || ||	TRUE	igd	NA	NA	NA	NA	NA	NA	NA	4	95093855	0.0017	4.574e-09	717910	BMI_strict	TRUE	reported	HKLPXU	textfile	2	1	TRUE
	rs768023	A	G	A	G	0.0161	-0.000242735	0.6033	0.613705	FALSE	FALSE	FALSE	ieu-b-5123	6	108876002	0.019212	NA	0.989919	HNC_noukb	Head and neck cancer (excl. UKB)	Head and neck cancer (excl. UKB) || ||	TRUE	igd	NA	NA	NA	NA	NA	NA	NA	6	108876002	0.0016	1.127e-22	806650	BMI_strict	TRUE	reported	HKLPXU	textfile	2	1	TRUE
	rs76942203	A	G	A	G	0.0263	-0.0171813	0.0587	0.0567803	FALSE	FALSE	FALSE	ieu-b-5123	11	116973247	0.0398446	NA	0.666316	HNC_noukb	Head and neck cancer (excl. UKB)	Head and neck cancer (excl. UKB) || ||	TRUE	igd	NA	NA	NA	NA	NA	NA	NA	11	116973247	0.0041	9.078e-11	484680	BMI_strict	TRUE	reported	HKLPXU	textfile	2	1	TRUE
	rs7696649	A	G	A	G	0.0116	-0.000470929	0.278	0.2934	FALSE	FALSE	FALSE	ieu-b-5123	4	120322177	0.0203723	NA	0.981558	HNC_noukb	Head and neck cancer (excl. UKB)	Head and neck cancer (excl. UKB) || ||	TRUE	igd	NA	NA	NA	NA	NA	NA	NA	4	120322177	0.0019	4.725e-10	718653	BMI_strict	TRUE	reported	HKLPXU	textfile	2	1	TRUE
	rs7713317	A	G	A	G	-0.0166	-0.0357646	0.7198	0.710191	FALSE	FALSE	FALSE	ieu-b-5123	5	95716722	0.02035	NA	0.078837	HNC_noukb	Head and neck cancer (excl. UKB)	Head and neck cancer (excl. UKB) || ||	TRUE	igd	NA	NA	NA	NA	NA	NA	NA	5	95716722	0.0018	1.959e-20	802425	BMI_strict	TRUE	reported	HKLPXU	textfile	2	1	TRUE
	rs7715256	T	G	T	G	-0.0158	-6.66103e-05	0.5644	0.573454	FALSE	FALSE	FALSE	ieu-b-5123	5	153537893	0.018702	NA	0.997158	HNC_noukb	Head and neck cancer (excl. UKB)	Head and neck cancer (excl. UKB) || ||	TRUE	igd	NA	NA	NA	NA	NA	NA	NA	5	153537893	0.0016	3.978e-22	806764	BMI_strict	TRUE	reported	HKLPXU	textfile	2	1	TRUE
	rs77165542	T	C	T	C	-0.0939	0.00723253	0.0341	0.0338121	FALSE	FALSE	FALSE	ieu-b-5123	2	430975	0.0531036	NA	0.891666	HNC_noukb	Head and neck cancer (excl. UKB)	Head and neck cancer (excl. UKB) || ||	TRUE	igd	NA	NA	NA	NA	NA	NA	NA	2	430975	0.0053	1.505e-70	484680	BMI_strict	TRUE	reported	HKLPXU	textfile	2	1	TRUE
	rs7730004	T	C	T	C	0.0139	0.0536734	0.6614	0.678231	FALSE	FALSE	FALSE	ieu-b-5123	5	43191033	0.0197387	NA	0.0065441	HNC_noukb	Head and neck cancer (excl. UKB)	Head and neck cancer (excl. UKB) || ||	TRUE	igd	NA	NA	NA	NA	NA	NA	NA	5	43191033	0.0018	1.461e-14	718548	BMI_strict	TRUE	reported	HKLPXU	textfile	2	1	TRUE
	rs7734385	A	G	A	G	-0.0101	0.008323	0.4449	0.424523	FALSE	FALSE	FALSE	ieu-b-5123	5	158460212	0.0186579	NA	0.655537	HNC_noukb	Head and neck cancer (excl. UKB)	Head and neck cancer (excl. UKB) || ||	TRUE	igd	NA	NA	NA	NA	NA	NA	NA	5	158460212	0.0016	6.084e-10	805693	BMI_strict	TRUE	reported	HKLPXU	textfile	2	1	TRUE
	rs77432547	A	G	A	G	-0.017	-0.0340902	0.7229	0.724236	FALSE	FALSE	FALSE	ieu-b-5123	13	86494817	0.0206753	NA	0.0991813	HNC_noukb	Head and neck cancer (excl. UKB)	Head and neck cancer (excl. UKB) || ||	TRUE	igd	NA	NA	NA	NA	NA	NA	NA	13	86494817	0.0021	1.44e-15	484680	BMI_strict	TRUE	reported	HKLPXU	textfile	2	1	TRUE
	rs7774	A	C	A	C	0.0128	0.00443734	0.3197	0.322499	FALSE	FALSE	FALSE	ieu-b-5123	17	4801887	0.0197328	NA	0.822079	HNC_noukb	Head and neck cancer (excl. UKB)	Head and neck cancer (excl. UKB) || ||	TRUE	igd	TRUE	rs7774	rs12936083	A	C	G	A	17	4801163	0.0021	4.223e-10	484680	BMI_strict	TRUE	reported	HKLPXU	textfile	2	1	TRUE
	rs7802342	T	G	T	G	-0.0124	-0.00790238	0.7048	0.712818	FALSE	FALSE	FALSE	ieu-b-5123	7	137435925	0.0206684	NA	0.702208	HNC_noukb	Head and neck cancer (excl. UKB)	Head and neck cancer (excl. UKB) || ||	TRUE	igd	NA	NA	NA	NA	NA	NA	NA	7	137435925	0.0019	6.233e-11	712979	BMI_strict	TRUE	reported	HKLPXU	textfile	2	1	TRUE
	rs7893571	T	G	T	G	0.0125	0.0217939	0.6736	0.658413	FALSE	FALSE	FALSE	ieu-b-5123	10	16750129	0.0197882	NA	0.270739	HNC_noukb	Head and neck cancer (excl. UKB)	Head and neck cancer (excl. UKB) || ||	TRUE	igd	NA	NA	NA	NA	NA	NA	NA	10	16750129	0.0018	5.832e-12	718186	BMI_strict	TRUE	reported	HKLPXU	textfile	2	1	TRUE
	rs7899106	A	G	A	G	-0.0327	-0.0365124	0.9496	0.952863	FALSE	FALSE	FALSE	ieu-b-5123	10	87410904	0.0431153	NA	0.397076	HNC_noukb	Head and neck cancer (excl. UKB)	Head and neck cancer (excl. UKB) || ||	TRUE	igd	NA	NA	NA	NA	NA	NA	NA	10	87410904	0.0037	1.719e-18	806450	BMI_strict	TRUE	reported	HKLPXU	textfile	2	1	TRUE
	rs7903146	T	C	T	C	-0.0178	-0.0536927	0.2787	0.28715	FALSE	FALSE	FALSE	ieu-b-5123	10	114758349	0.0203563	NA	0.00834834	HNC_noukb	Head and neck cancer (excl. UKB)	Head and neck cancer (excl. UKB) || ||	TRUE	igd	NA	NA	NA	NA	NA	NA	NA	10	114758349	0.0018	1.665e-23	806810	BMI_strict	TRUE	reported	HKLPXU	textfile	2	1	TRUE
	rs79186842	A	G	A	G	0.0202	-0.0292279	0.8597	0.853039	FALSE	FALSE	FALSE	ieu-b-5123	20	47689036	0.0258515	NA	0.258219	HNC_noukb	Head and neck cancer (excl. UKB)	Head and neck cancer (excl. UKB) || ||	TRUE	igd	NA	NA	NA	NA	NA	NA	NA	20	47689036	0.0028	2.596e-13	484680	BMI_strict	TRUE	reported	HKLPXU	textfile	2	1	TRUE
	rs7944782	T	G	T	G	-0.0144	0.00431922	0.5016	0.494614	FALSE	FALSE	FALSE	ieu-b-5123	11	130795698	0.0185897	NA	0.81627	HNC_noukb	Head and neck cancer (excl. UKB)	Head and neck cancer (excl. UKB) || ||	TRUE	igd	NA	NA	NA	NA	NA	NA	NA	11	130795698	0.0017	3.61e-17	718230	BMI_strict	TRUE	reported	HKLPXU	textfile	2	1	TRUE
	rs7975187	A	G	A	G	-0.0137	0.00686649	0.7712	0.796689	FALSE	FALSE	FALSE	ieu-b-5123	12	60964108	0.0229307	NA	0.764599	HNC_noukb	Head and neck cancer (excl. UKB)	Head and neck cancer (excl. UKB) || ||	TRUE	igd	NA	NA	NA	NA	NA	NA	NA	12	60964108	0.0021	3.86e-11	718606	BMI_strict	TRUE	reported	HKLPXU	textfile	2	1	TRUE
	rs79780963	T	C	T	C	0.0244	-0.0209467	0.0804	0.0816245	FALSE	FALSE	FALSE	ieu-b-5123	10	104952499	0.0335784	NA	0.532749	HNC_noukb	Head and neck cancer (excl. UKB)	Head and neck cancer (excl. UKB) || ||	TRUE	igd	NA	NA	NA	NA	NA	NA	NA	10	104952499	0.0035	2.632e-12	484680	BMI_strict	TRUE	reported	HKLPXU	textfile	2	1	TRUE
	rs79906980	T	C	T	C	0.0158	0.00441412	0.1555	0.155359	FALSE	FALSE	FALSE	ieu-b-5123	1	57887985	0.0256321	NA	0.863272	HNC_noukb	Head and neck cancer (excl. UKB)	Head and neck cancer (excl. UKB) || ||	TRUE	igd	NA	NA	NA	NA	NA	NA	NA	1	57887985	0.0026	1.691e-09	484680	BMI_strict	TRUE	reported	HKLPXU	textfile	2	1	TRUE
	rs8065172	A	G	A	G	-0.0124	0.00475794	0.2383	0.24195	FALSE	FALSE	FALSE	ieu-b-5123	17	31456969	0.0215738	NA	0.825449	HNC_noukb	Head and neck cancer (excl. UKB)	Head and neck cancer (excl. UKB) || ||	TRUE	igd	NA	NA	NA	NA	NA	NA	NA	17	31456969	0.002	5.291e-10	718308	BMI_strict	TRUE	reported	HKLPXU	textfile	2	1	TRUE
	rs8097672	A	T	A	T	-0.0209	0.000110302	0.8545	0.852652	FALSE	TRUE	FALSE	ieu-b-5123	18	1839601	0.0260052	NA	0.996616	HNC_noukb	Head and neck cancer (excl. UKB)	Head and neck cancer (excl. UKB) || ||	TRUE	igd	NA	NA	NA	NA	NA	NA	NA	18	1839601	0.0024	3.26e-18	718627	BMI_strict	TRUE	reported	HKLPXU	textfile	2	1	TRUE
	rs8122855	A	G	A	G	0.0137	0.0205117	0.3377	0.33356	FALSE	FALSE	FALSE	ieu-b-5123	20	25192049	0.019518	NA	0.293299	HNC_noukb	Head and neck cancer (excl. UKB)	Head and neck cancer (excl. UKB) || ||	TRUE	igd	NA	NA	NA	NA	NA	NA	NA	20	25192049	0.0018	4.108e-14	717822	BMI_strict	TRUE	reported	HKLPXU	textfile	2	1	TRUE
	rs8134638	T	C	T	C	-0.0133	-0.00313362	0.6273	0.621581	FALSE	FALSE	FALSE	ieu-b-5123	21	40644170	0.0191097	NA	0.869747	HNC_noukb	Head and neck cancer (excl. UKB)	Head and neck cancer (excl. UKB) || ||	TRUE	igd	NA	NA	NA	NA	NA	NA	NA	21	40644170	0.002	1.574e-11	484680	BMI_strict	TRUE	reported	HKLPXU	textfile	2	1	TRUE
	rs8181823	A	C	A	C	-0.0125	0.0128203	0.2344	0.239893	FALSE	FALSE	FALSE	ieu-b-5123	13	65477940	0.0216304	NA	0.553385	HNC_noukb	Head and neck cancer (excl. UKB)	Head and neck cancer (excl. UKB) || ||	TRUE	igd	NA	NA	NA	NA	NA	NA	NA	13	65477940	0.002	4.363e-10	718253	BMI_strict	TRUE	reported	HKLPXU	textfile	2	1	TRUE
	rs845084	A	G	A	G	0.0136	-0.0134392	0.2666	0.265073	FALSE	FALSE	FALSE	ieu-b-5123	10	125220036	0.0210284	NA	0.52276	HNC_noukb	Head and neck cancer (excl. UKB)	Head and neck cancer (excl. UKB) || ||	TRUE	igd	NA	NA	NA	NA	NA	NA	NA	10	125220036	0.0019	3.219e-12	718056	BMI_strict	TRUE	reported	HKLPXU	textfile	2	1	TRUE
	rs852056	T	C	T	C	0.0123	0.0268469	0.2538	0.244626	FALSE	FALSE	FALSE	ieu-b-5123	20	17102860	0.0214596	NA	0.210919	HNC_noukb	Head and neck cancer (excl. UKB)	Head and neck cancer (excl. UKB) || ||	TRUE	igd	NA	NA	NA	NA	NA	NA	NA	20	17102860	0.0019	2.145e-10	718527	BMI_strict	TRUE	reported	HKLPXU	textfile	2	1	TRUE
	rs865809	A	G	A	G	0.0124	-0.0174173	0.2246	0.232449	FALSE	FALSE	FALSE	ieu-b-5123	3	183997735	0.0219907	NA	0.428345	HNC_noukb	Head and neck cancer (excl. UKB)	Head and neck cancer (excl. UKB) || ||	TRUE	igd	NA	NA	NA	NA	NA	NA	NA	3	183997735	0.002	6.502e-10	718234	BMI_strict	TRUE	reported	HKLPXU	textfile	2	1	TRUE
	rs879620	T	C	T	C	0.0226	0.0153064	0.5966	0.611554	FALSE	FALSE	FALSE	ieu-b-5123	16	4015729	0.0190284	NA	0.421169	HNC_noukb	Head and neck cancer (excl. UKB)	Head and neck cancer (excl. UKB) || ||	TRUE	igd	NA	NA	NA	NA	NA	NA	NA	16	4015729	0.0017	8.449e-39	718515	BMI_strict	TRUE	reported	HKLPXU	textfile	2	1	TRUE
	rs889398	T	C	T	C	-0.0195	-0.0288522	0.4151	0.411535	FALSE	FALSE	FALSE	ieu-b-5123	16	69556715	0.018735	NA	0.123557	HNC_noukb	Head and neck cancer (excl. UKB)	Head and neck cancer (excl. UKB) || ||	TRUE	igd	NA	NA	NA	NA	NA	NA	NA	16	69556715	0.0016	3.234e-32	806620	BMI_strict	TRUE	reported	HKLPXU	textfile	2	1	TRUE
	rs891387	T	C	T	C	0.0208	-0.00457846	0.4951	0.51451	FALSE	FALSE	FALSE	ieu-b-5123	18	21103909	0.0184721	NA	0.804244	HNC_noukb	Head and neck cancer (excl. UKB)	Head and neck cancer (excl. UKB) || ||	TRUE	igd	NA	NA	NA	NA	NA	NA	NA	18	21103909	0.0017	9.256e-35	718548	BMI_strict	TRUE	reported	HKLPXU	textfile	2	1	TRUE
	rs895330	C	G	C	G	0.0196	0.0275711	0.806	0.814372	FALSE	TRUE	FALSE	ieu-b-5123	19	4060707	0.0242119	NA	0.254811	HNC_noukb	Head and neck cancer (excl. UKB)	Head and neck cancer (excl. UKB) || ||	TRUE	igd	NA	NA	NA	NA	NA	NA	NA	19	4060707	0.0022	1.588e-19	712588	BMI_strict	TRUE	reported	HKLPXU	textfile	2	1	TRUE
	rs900144	T	C	T	C	0.0148	0.0131573	0.5784	0.563618	FALSE	FALSE	FALSE	ieu-b-5123	11	13294268	0.0186268	NA	0.479962	HNC_noukb	Head and neck cancer (excl. UKB)	Head and neck cancer (excl. UKB) || ||	TRUE	igd	NA	NA	NA	NA	NA	NA	NA	11	13294268	0.0017	1.526e-18	718416	BMI_strict	TRUE	reported	HKLPXU	textfile	2	1	TRUE
	rs9168	A	C	A	C	-0.0139	0.00268204	0.2752	0.294574	FALSE	FALSE	FALSE	ieu-b-5123	13	99101583	0.0203198	NA	0.894991	HNC_noukb	Head and neck cancer (excl. UKB)	Head and neck cancer (excl. UKB) || ||	TRUE	igd	NA	NA	NA	NA	NA	NA	NA	13	99101583	0.0019	1.075e-13	718514	BMI_strict	TRUE	reported	HKLPXU	textfile	2	1	TRUE
	rs925018	C	G	C	G	-0.013	-0.0279655	0.6665	0.681631	FALSE	TRUE	FALSE	ieu-b-5123	3	62713143	0.0197203	NA	0.15616	HNC_noukb	Head and neck cancer (excl. UKB)	Head and neck cancer (excl. UKB) || ||	TRUE	igd	NA	NA	NA	NA	NA	NA	NA	3	62713143	0.0017	4.328e-14	806677	BMI_strict	TRUE	reported	HKLPXU	textfile	2	1	TRUE
	rs9294260	A	G	A	G	0.014	0.0170174	0.4689	0.474354	FALSE	FALSE	FALSE	ieu-b-5123	6	83433228	0.0185733	NA	0.359547	HNC_noukb	Head and neck cancer (excl. UKB)	Head and neck cancer (excl. UKB) || ||	TRUE	igd	NA	NA	NA	NA	NA	NA	NA	6	83433228	0.0016	8.161e-18	806412	BMI_strict	TRUE	reported	HKLPXU	textfile	2	1	TRUE
	rs9299	T	C	T	C	0.0119	-0.0169192	0.6447	0.655209	FALSE	FALSE	FALSE	ieu-b-5123	17	46669430	0.0192368	NA	0.379118	HNC_noukb	Head and neck cancer (excl. UKB)	Head and neck cancer (excl. UKB) || ||	TRUE	igd	NA	NA	NA	NA	NA	NA	NA	17	46669430	0.0018	1.869e-11	718669	BMI_strict	TRUE	reported	HKLPXU	textfile	2	1	TRUE
	rs930295	A	C	A	C	0.0208	0.0213077	0.1548	0.167363	FALSE	FALSE	FALSE	ieu-b-5123	2	50233352	0.0251877	NA	0.397576	HNC_noukb	Head and neck cancer (excl. UKB)	Head and neck cancer (excl. UKB) || ||	TRUE	igd	NA	NA	NA	NA	NA	NA	NA	2	50233352	0.0023	2.03e-19	716913	BMI_strict	TRUE	reported	HKLPXU	textfile	2	1	TRUE
	rs9304665	A	T	A	T	0.023	0.0115656	0.7423	0.734173	FALSE	TRUE	FALSE	ieu-b-5123	19	47602577	0.0226793	NA	0.610077	HNC_noukb	Head and neck cancer (excl. UKB)	Head and neck cancer (excl. UKB) || ||	TRUE	igd	NA	NA	NA	NA	NA	NA	NA	19	47602577	0.002	2.203e-31	717324	BMI_strict	TRUE	reported	HKLPXU	textfile	2	1	TRUE
	rs9320823	T	C	T	C	-0.0165	-0.0131573	0.4118	0.390347	FALSE	FALSE	FALSE	ieu-b-5123	6	98429337	0.0190409	NA	0.489562	HNC_noukb	Head and neck cancer (excl. UKB)	Head and neck cancer (excl. UKB) || ||	TRUE	igd	NA	NA	NA	NA	NA	NA	NA	6	98429337	0.0017	2.073e-21	718696	BMI_strict	TRUE	reported	HKLPXU	textfile	2	1	TRUE
	rs935166	A	G	A	G	-0.0152	-0.028219	0.4948	0.503133	FALSE	FALSE	FALSE	ieu-b-5123	2	26949366	0.0184878	NA	0.126921	HNC_noukb	Head and neck cancer (excl. UKB)	Head and neck cancer (excl. UKB) || ||	TRUE	igd	NA	NA	NA	NA	NA	NA	NA	2	26949366	0.0019	8.691e-16	484680	BMI_strict	TRUE	reported	HKLPXU	textfile	2	1	TRUE
	rs942066	A	G	A	G	-0.0202	-0.00240229	0.373	0.371398	FALSE	FALSE	FALSE	ieu-b-5123	14	94031914	0.0191899	NA	0.900377	HNC_noukb	Head and neck cancer (excl. UKB)	Head and neck cancer (excl. UKB) || ||	TRUE	igd	NA	NA	NA	NA	NA	NA	NA	14	94031914	0.002	2.356e-24	484680	BMI_strict	TRUE	reported	HKLPXU	textfile	2	1	TRUE
	rs946824	T	C	T	C	0.0197	-0.0220616	0.1355	0.143794	FALSE	FALSE	FALSE	ieu-b-5123	1	243684019	0.0268938	NA	0.412031	HNC_noukb	Head and neck cancer (excl. UKB)	Head and neck cancer (excl. UKB) || ||	TRUE	igd	NA	NA	NA	NA	NA	NA	NA	1	243684019	0.0025	4.823e-15	717750	BMI_strict	TRUE	reported	HKLPXU	textfile	2	1	TRUE
	rs9478496	T	C	T	C	-0.0157	-0.0175079	0.8453	0.832439	FALSE	FALSE	FALSE	ieu-b-5123	6	154333183	0.0245138	NA	0.475101	HNC_noukb	Head and neck cancer (excl. UKB)	Head and neck cancer (excl. UKB) || ||	TRUE	igd	NA	NA	NA	NA	NA	NA	NA	6	154333183	0.0023	8.169e-12	718366	BMI_strict	TRUE	reported	HKLPXU	textfile	2	1	TRUE
	rs9522183	T	G	T	G	-0.0135	0.0131044	0.5492	0.546747	FALSE	FALSE	FALSE	ieu-b-5123	13	111977280	0.0185424	NA	0.479736	HNC_noukb	Head and neck cancer (excl. UKB)	Head and neck cancer (excl. UKB) || ||	TRUE	igd	NA	NA	NA	NA	NA	NA	NA	13	111977280	0.0019	2.1e-12	484680	BMI_strict	TRUE	reported	HKLPXU	textfile	2	1	TRUE
	rs9527895	T	C	T	C	-0.0158	-0.0213543	0.819	0.835462	FALSE	FALSE	FALSE	ieu-b-5123	13	59367767	0.0247232	NA	0.387733	HNC_noukb	Head and neck cancer (excl. UKB)	Head and neck cancer (excl. UKB) || ||	TRUE	igd	NA	NA	NA	NA	NA	NA	NA	13	59367767	0.0023	3.693e-12	718497	BMI_strict	TRUE	reported	HKLPXU	textfile	2	1	TRUE
	rs9531786	C	G	C	G	-0.0111	-0.0113617	0.3715	0.358066	FALSE	TRUE	FALSE	ieu-b-5123	13	85983968	0.0193543	NA	0.557178	HNC_noukb	Head and neck cancer (excl. UKB)	Head and neck cancer (excl. UKB) || ||	TRUE	igd	NA	NA	NA	NA	NA	NA	NA	13	85983968	0.0018	4.111e-10	714692	BMI_strict	TRUE	reported	HKLPXU	textfile	2	1	TRUE
	rs9569777	T	G	T	G	-0.0201	0.0286038	0.1865	0.169693	FALSE	FALSE	FALSE	ieu-b-5123	13	58510376	0.024613	NA	0.245176	HNC_noukb	Head and neck cancer (excl. UKB)	Head and neck cancer (excl. UKB) || ||	TRUE	igd	TRUE	rs9569777	rs9569780	T	G	A	G	13	58484786	0.0021	3.43e-21	806752	BMI_strict	TRUE	reported	HKLPXU	textfile	2	1	TRUE
	rs9595908	T	C	T	C	0.0154	0.04003	0.6427	0.630681	FALSE	FALSE	FALSE	ieu-b-5123	13	33184288	0.0190966	NA	0.0360662	HNC_noukb	Head and neck cancer (excl. UKB)	Head and neck cancer (excl. UKB) || ||	TRUE	igd	NA	NA	NA	NA	NA	NA	NA	13	33184288	0.0017	3.734e-20	806589	BMI_strict	TRUE	reported	HKLPXU	textfile	2	1	TRUE
	rs9599161	T	C	T	C	0.0098	0.0116047	0.57	0.581984	FALSE	FALSE	FALSE	ieu-b-5123	13	67434016	0.0187663	NA	0.536325	HNC_noukb	Head and neck cancer (excl. UKB)	Head and neck cancer (excl. UKB) || ||	TRUE	igd	NA	NA	NA	NA	NA	NA	NA	13	67434016	0.0016	2.324e-09	806768	BMI_strict	TRUE	reported	HKLPXU	textfile	2	1	TRUE
	rs9603697	T	C	T	C	0.0134	-0.0839592	0.3184	0.320311	FALSE	FALSE	FALSE	ieu-b-5123	13	40783323	0.0197458	NA	2.11865e-05	HNC_noukb	Head and neck cancer (excl. UKB)	Head and neck cancer (excl. UKB) || ||	TRUE	igd	NA	NA	NA	NA	NA	NA	NA	13	40783323	0.0018	1.689e-13	718556	BMI_strict	TRUE	reported	HKLPXU	textfile	2	1	TRUE
	rs962796	T	C	T	C	0.014	-0.0211938	0.1937	0.203692	FALSE	FALSE	FALSE	ieu-b-5123	13	54385284	0.0227996	NA	0.352596	HNC_noukb	Head and neck cancer (excl. UKB)	Head and neck cancer (excl. UKB) || ||	TRUE	igd	NA	NA	NA	NA	NA	NA	NA	13	54385284	0.0021	1.88e-11	718667	BMI_strict	TRUE	reported	HKLPXU	textfile	2	1	TRUE
	rs9816226	A	T	A	T	-0.0315	0.0116055	0.1755	0.186903	FALSE	TRUE	FALSE	ieu-b-5123	3	185834499	0.0240784	NA	0.629814	HNC_noukb	Head and neck cancer (excl. UKB)	Head and neck cancer (excl. UKB) || ||	TRUE	igd	NA	NA	NA	NA	NA	NA	NA	3	185834499	0.0021	1.447e-50	794122	BMI_strict	TRUE	reported	HKLPXU	textfile	2	1	TRUE
	rs9818122	T	C	T	C	-0.0228	0.0517459	0.7933	0.804738	FALSE	FALSE	FALSE	ieu-b-5123	3	85868671	0.0233081	NA	0.0264131	HNC_noukb	Head and neck cancer (excl. UKB)	Head and neck cancer (excl. UKB) || ||	TRUE	igd	TRUE	rs9818122	rs17355368	C	T	A	G	3	85861064	0.002	3.966e-30	806655	BMI_strict	TRUE	reported	HKLPXU	textfile	2	1	TRUE
	rs9826775	A	G	A	G	0.0155	0.0193489	0.8513	0.852384	FALSE	FALSE	FALSE	ieu-b-5123	3	156295341	0.0260484	NA	0.457599	HNC_noukb	Head and neck cancer (excl. UKB)	Head and neck cancer (excl. UKB) || ||	TRUE	igd	NA	NA	NA	NA	NA	NA	NA	3	156295341	0.0024	6.614e-11	715852	BMI_strict	TRUE	reported	HKLPXU	textfile	2	1	TRUE
	rs9827823	T	C	T	C	0.0182	-0.0153681	0.8552	0.847462	FALSE	FALSE	FALSE	ieu-b-5123	3	84221774	0.0254631	NA	0.546148	HNC_noukb	Head and neck cancer (excl. UKB)	Head and neck cancer (excl. UKB) || ||	TRUE	igd	NA	NA	NA	NA	NA	NA	NA	3	84221774	0.0023	3.39e-15	718678	BMI_strict	TRUE	reported	HKLPXU	textfile	2	1	TRUE
	rs9888533	T	C	T	C	0.0125	0.00808154	0.5302	0.537282	FALSE	FALSE	FALSE	ieu-b-5123	13	107854612	0.0190016	NA	0.670612	HNC_noukb	Head and neck cancer (excl. UKB)	Head and neck cancer (excl. UKB) || ||	TRUE	igd	NA	NA	NA	NA	NA	NA	NA	13	107854612	0.0019	1.378e-10	484680	BMI_strict	TRUE	reported	HKLPXU	textfile	2	1	TRUE
	rs9926784	T	C	T	C	0.0237	-0.0375639	0.8007	0.815509	FALSE	FALSE	FALSE	ieu-b-5123	16	19941968	0.0236723	NA	0.112552	HNC_noukb	Head and neck cancer (excl. UKB)	Head and neck cancer (excl. UKB) || ||	TRUE	igd	NA	NA	NA	NA	NA	NA	NA	16	19941968	0.0021	1.084e-30	800954	BMI_strict	TRUE	reported	HKLPXU	textfile	2	1	TRUE
	rs9944219	A	G	A	G	-0.0119	-0.00166383	0.6044	0.60974	FALSE	FALSE	FALSE	ieu-b-5123	15	46500612	0.0189214	NA	0.929929	HNC_noukb	Head and neck cancer (excl. UKB)	Head and neck cancer (excl. UKB) || ||	TRUE	igd	NA	NA	NA	NA	NA	NA	NA	15	46500612	0.0017	8.137e-13	806243	BMI_strict	TRUE	reported	HKLPXU	textfile	2	1	TRUE
	rs994596	T	C	T	C	0.013	0.0258168	0.3247	0.323713	FALSE	FALSE	FALSE	ieu-b-5123	4	18459828	0.0196933	NA	0.189878	HNC_noukb	Head and neck cancer (excl. UKB)	Head and neck cancer (excl. UKB) || ||	TRUE	igd	NA	NA	NA	NA	NA	NA	NA	4	18459828	0.0018	1.055e-12	718470	BMI_strict	TRUE	reported	HKLPXU	textfile	2	1	TRUE
	rs9951619	T	G	T	G	-0.0152	-0.0177889	0.2239	0.233306	FALSE	FALSE	FALSE	ieu-b-5123	18	56882326	0.0220069	NA	0.418899	HNC_noukb	Head and neck cancer (excl. UKB)	Head and neck cancer (excl. UKB) || ||	TRUE	igd	NA	NA	NA	NA	NA	NA	NA	18	56882326	0.0019	2.332e-15	794609	BMI_strict	TRUE	reported	HKLPXU	textfile	2	1	TRUE
BMI-HPC	rs10002111	A	G	A	G	0.0125	0.0611019	0.2227	0.232145	FALSE	FALSE	FALSE	ieu-b-5124	4	67815504	0.0790867	NA	0.439763	HPC_noukb	Hypopharyngeal cancer (excl. UKB)	Hypopharyngeal cancer (excl. UKB) || ||	TRUE	igd	NA	NA	NA	NA	NA	NA	NA	4	67815504	0.0021	1.257e-09	718668	BMI_strict	TRUE	reported	HKLPXU	textfile	2	1	TRUE
	rs10033843	A	G	A	G	0.014	-0.076209	0.215	0.20657	FALSE	FALSE	FALSE	ieu-b-5124	4	77028783	0.0863238	NA	0.37733	HPC_noukb	Hypopharyngeal cancer (excl. UKB)	Hypopharyngeal cancer (excl. UKB) || ||	TRUE	igd	NA	NA	NA	NA	NA	NA	NA	4	77028783	0.0021	1.073e-11	714618	BMI_strict	TRUE	reported	HKLPXU	textfile	2	1	TRUE
	rs10050620	T	C	T	C	-0.013	0.0454714	0.3308	0.32626	FALSE	FALSE	FALSE	ieu-b-5124	5	63927239	0.0716064	NA	0.525416	HPC_noukb	Hypopharyngeal cancer (excl. UKB)	Hypopharyngeal cancer (excl. UKB) || ||	TRUE	igd	NA	NA	NA	NA	NA	NA	NA	5	63927239	0.002	1.198e-10	484680	BMI_strict	TRUE	reported	HKLPXU	textfile	2	1	TRUE
	rs1006317	T	G	T	G	0.016	0.0933985	0.1268	0.129273	FALSE	FALSE	FALSE	ieu-b-5124	1	209552636	0.0996298	NA	0.348524	HPC_noukb	Hypopharyngeal cancer (excl. UKB)	Hypopharyngeal cancer (excl. UKB) || ||	TRUE	igd	NA	NA	NA	NA	NA	NA	NA	1	209552636	0.0026	3.749e-10	717508	BMI_strict	TRUE	reported	HKLPXU	textfile	2	1	TRUE
	rs10099330	A	G	A	G	-0.0119	0.0261367	0.538	0.562948	FALSE	FALSE	FALSE	ieu-b-5124	8	143383694	0.0682933	NA	0.701934	HPC_noukb	Hypopharyngeal cancer (excl. UKB)	Hypopharyngeal cancer (excl. UKB) || ||	TRUE	igd	NA	NA	NA	NA	NA	NA	NA	8	143383694	0.0017	3.218e-12	714811	BMI_strict	TRUE	reported	HKLPXU	textfile	2	1	TRUE
	rs10101364	T	C	T	C	0.012	0.0374533	0.6801	0.683241	FALSE	FALSE	FALSE	ieu-b-5124	8	20634888	0.0731909	NA	0.608847	HPC_noukb	Hypopharyngeal cancer (excl. UKB)	Hypopharyngeal cancer (excl. UKB) || ||	TRUE	igd	NA	NA	NA	NA	NA	NA	NA	8	20634888	0.0018	5.607e-11	711583	BMI_strict	TRUE	reported	HKLPXU	textfile	2	1	TRUE
	rs10121187	C	G	C	G	0.0102	-0.00541915	0.509	0.51965	FALSE	TRUE	TRUE	ieu-b-5124	9	29737191	0.0675325	NA	0.936042	HPC_noukb	Hypopharyngeal cancer (excl. UKB)	Hypopharyngeal cancer (excl. UKB) || ||	TRUE	igd	NA	NA	NA	NA	NA	NA	NA	9	29737191	0.0017	2.016e-09	718682	BMI_strict	TRUE	reported	HKLPXU	textfile	2	1	FALSE
	rs10132280	A	C	A	C	-0.0214	-0.0412334	0.311	0.293944	FALSE	FALSE	FALSE	ieu-b-5124	14	25928179	0.0747558	NA	0.581239	HPC_noukb	Hypopharyngeal cancer (excl. UKB)	Hypopharyngeal cancer (excl. UKB) || ||	TRUE	igd	NA	NA	NA	NA	NA	NA	NA	14	25928179	0.0018	2.283e-33	806477	BMI_strict	TRUE	reported	HKLPXU	textfile	2	1	TRUE
	rs10145749	T	C	T	C	0.0161	-0.0965861	0.1549	0.14269	FALSE	FALSE	FALSE	ieu-b-5124	14	102782109	0.0996753	NA	0.332541	HPC_noukb	Hypopharyngeal cancer (excl. UKB)	Hypopharyngeal cancer (excl. UKB) || ||	TRUE	igd	NA	NA	NA	NA	NA	NA	NA	14	102782109	0.0026	8.325e-10	484680	BMI_strict	TRUE	reported	HKLPXU	textfile	2	1	TRUE
	rs10168563	A	G	A	G	0.0126	-0.0131754	0.7031	0.700204	FALSE	FALSE	FALSE	ieu-b-5124	2	35558345	0.074364	NA	0.859371	HPC_noukb	Hypopharyngeal cancer (excl. UKB)	Hypopharyngeal cancer (excl. UKB) || ||	TRUE	igd	TRUE	rs10168563	rs7579183	G	A	A	G	2	35552173	0.0018	9.334e-12	718585	BMI_strict	TRUE	reported	HKLPXU	textfile	2	1	TRUE
	rs10169594	T	C	T	C	-0.012	-0.0371893	0.6475	0.63666	FALSE	FALSE	FALSE	ieu-b-5124	2	41637688	0.0700868	NA	0.595684	HPC_noukb	Hypopharyngeal cancer (excl. UKB)	Hypopharyngeal cancer (excl. UKB) || ||	TRUE	igd	NA	NA	NA	NA	NA	NA	NA	2	41637688	0.0018	1.338e-11	718035	BMI_strict	TRUE	reported	HKLPXU	textfile	2	1	TRUE
	rs10182181	A	G	A	G	-0.0327	-0.0603922	0.5052	0.52263	FALSE	FALSE	FALSE	ieu-b-5124	2	25150296	0.0672838	NA	0.369412	HPC_noukb	Hypopharyngeal cancer (excl. UKB)	Hypopharyngeal cancer (excl. UKB) || ||	TRUE	igd	NA	NA	NA	NA	NA	NA	NA	2	25150296	0.0016	2.45e-91	806439	BMI_strict	TRUE	reported	HKLPXU	textfile	2	1	TRUE
	rs10185199	A	G	A	G	-0.0143	-0.0131995	0.286	0.28075	FALSE	FALSE	FALSE	ieu-b-5124	2	40282202	0.0782986	NA	0.866128	HPC_noukb	Hypopharyngeal cancer (excl. UKB)	Hypopharyngeal cancer (excl. UKB) || ||	TRUE	igd	NA	NA	NA	NA	NA	NA	NA	2	40282202	0.002	3.178e-13	706553	BMI_strict	TRUE	reported	HKLPXU	textfile	2	1	TRUE
	rs10197031	T	C	T	C	-0.0161	0.139747	0.7262	0.71868	FALSE	FALSE	FALSE	ieu-b-5124	2	105454590	0.0775723	NA	0.0716226	HPC_noukb	Hypopharyngeal cancer (excl. UKB)	Hypopharyngeal cancer (excl. UKB) || ||	TRUE	igd	NA	NA	NA	NA	NA	NA	NA	2	105454590	0.0019	5.047e-18	718456	BMI_strict	TRUE	reported	HKLPXU	textfile	2	1	TRUE
	rs10261050	T	C	T	C	0.0113	-0.0740985	0.4754	0.459867	FALSE	FALSE	FALSE	ieu-b-5124	7	114337652	0.0679762	NA	0.275684	HPC_noukb	Hypopharyngeal cancer (excl. UKB)	Hypopharyngeal cancer (excl. UKB) || ||	TRUE	igd	NA	NA	NA	NA	NA	NA	NA	7	114337652	0.0017	4.533e-11	718350	BMI_strict	TRUE	reported	HKLPXU	textfile	2	1	TRUE
	rs10499694	A	G	A	G	0.013	-0.0627279	0.4935	0.485787	FALSE	FALSE	FALSE	ieu-b-5124	7	50614173	0.0679786	NA	0.356133	HPC_noukb	Hypopharyngeal cancer (excl. UKB)	Hypopharyngeal cancer (excl. UKB) || ||	TRUE	igd	NA	NA	NA	NA	NA	NA	NA	7	50614173	0.0016	1.285e-15	806696	BMI_strict	TRUE	reported	HKLPXU	textfile	2	1	TRUE
	rs10506971	A	G	A	G	-0.0142	0.105587	0.5521	0.541994	FALSE	FALSE	FALSE	ieu-b-5124	12	89757937	0.0698178	NA	0.130451	HPC_noukb	Hypopharyngeal cancer (excl. UKB)	Hypopharyngeal cancer (excl. UKB) || ||	TRUE	igd	NA	NA	NA	NA	NA	NA	NA	12	89757937	0.0017	4.686e-17	717231	BMI_strict	TRUE	reported	HKLPXU	textfile	2	1	TRUE
	rs10510419	T	G	T	G	-0.0168	-0.100943	0.1467	0.14404	FALSE	FALSE	FALSE	ieu-b-5124	3	12426936	0.0981805	NA	0.303887	HPC_noukb	Hypopharyngeal cancer (excl. UKB)	Hypopharyngeal cancer (excl. UKB) || ||	TRUE	igd	NA	NA	NA	NA	NA	NA	NA	3	12426936	0.0023	2.233e-13	800535	BMI_strict	TRUE	reported	HKLPXU	textfile	2	1	TRUE
	rs10518694	A	C	A	C	0.0144	0.0672565	0.1394	0.141164	FALSE	FALSE	FALSE	ieu-b-5124	15	53072673	0.0955763	NA	0.481623	HPC_noukb	Hypopharyngeal cancer (excl. UKB)	Hypopharyngeal cancer (excl. UKB) || ||	TRUE	igd	NA	NA	NA	NA	NA	NA	NA	15	53072673	0.0024	3.431e-09	718281	BMI_strict	TRUE	reported	HKLPXU	textfile	2	1	TRUE
	rs10733682	A	G	A	G	0.0148	-0.0536398	0.4594	0.487118	FALSE	FALSE	FALSE	ieu-b-5124	9	129460914	0.0688248	NA	0.435763	HPC_noukb	Hypopharyngeal cancer (excl. UKB)	Hypopharyngeal cancer (excl. UKB) || ||	TRUE	igd	NA	NA	NA	NA	NA	NA	NA	9	129460914	0.0016	1.755e-19	805407	BMI_strict	TRUE	reported	HKLPXU	textfile	2	1	TRUE
	rs10741329	A	G	A	G	0.0115	0.0484801	0.6944	0.682133	FALSE	FALSE	FALSE	ieu-b-5124	11	89997796	0.07319	NA	0.507723	HPC_noukb	Hypopharyngeal cancer (excl. UKB)	Hypopharyngeal cancer (excl. UKB) || ||	TRUE	igd	NA	NA	NA	NA	NA	NA	NA	11	89997796	0.0018	3.914e-10	718412	BMI_strict	TRUE	reported	HKLPXU	textfile	2	1	TRUE
	rs10742752	T	C	T	C	-0.0123	0.115191	0.3761	0.395696	FALSE	FALSE	FALSE	ieu-b-5124	11	45438374	0.0685267	NA	0.0927684	HPC_noukb	Hypopharyngeal cancer (excl. UKB)	Hypopharyngeal cancer (excl. UKB) || ||	TRUE	igd	NA	NA	NA	NA	NA	NA	NA	11	45438374	0.0017	1.203e-13	806700	BMI_strict	TRUE	reported	HKLPXU	textfile	2	1	TRUE
	rs1075901	T	C	T	C	-0.0118	-0.101666	0.4516	0.445919	FALSE	FALSE	FALSE	ieu-b-5124	17	15943910	0.0687524	NA	0.139212	HPC_noukb	Hypopharyngeal cancer (excl. UKB)	Hypopharyngeal cancer (excl. UKB) || ||	TRUE	igd	NA	NA	NA	NA	NA	NA	NA	17	15943910	0.0016	4.431e-13	806810	BMI_strict	TRUE	reported	HKLPXU	textfile	2	1	TRUE
	rs10761785	T	G	T	G	-0.0133	0.173066	0.5136	0.516881	FALSE	FALSE	FALSE	ieu-b-5124	10	65321147	0.0674346	NA	0.0102752	HPC_noukb	Hypopharyngeal cancer (excl. UKB)	Hypopharyngeal cancer (excl. UKB) || ||	TRUE	igd	TRUE	rs10761785	rs12245149	G	T	A	C	10	65318766	0.0016	3.467e-16	806365	BMI_strict	TRUE	reported	HKLPXU	textfile	2	1	TRUE
	rs10772983	T	C	T	C	-0.01	0.0948864	0.5394	0.51371	FALSE	FALSE	FALSE	ieu-b-5124	12	17141582	0.0678448	NA	0.161939	HPC_noukb	Hypopharyngeal cancer (excl. UKB)	Hypopharyngeal cancer (excl. UKB) || ||	TRUE	igd	NA	NA	NA	NA	NA	NA	NA	12	17141582	0.0016	6.209e-10	804927	BMI_strict	TRUE	reported	HKLPXU	textfile	2	1	TRUE
	rs10779751	A	G	A	G	0.0131	0.163531	0.2787	0.288862	FALSE	FALSE	FALSE	ieu-b-5124	1	11284336	0.0754461	NA	0.0301947	HPC_noukb	Hypopharyngeal cancer (excl. UKB)	Hypopharyngeal cancer (excl. UKB) || ||	TRUE	igd	NA	NA	NA	NA	NA	NA	NA	1	11284336	0.0018	2.657e-13	806531	BMI_strict	TRUE	reported	HKLPXU	textfile	2	1	TRUE
	rs10788494	C	G	C	G	0.0132	1.93378e-05	0.4835	0.496275	FALSE	TRUE	TRUE	ieu-b-5124	10	88110925	0.0674882	NA	0.999771	HPC_noukb	Hypopharyngeal cancer (excl. UKB)	Hypopharyngeal cancer (excl. UKB) || ||	TRUE	igd	NA	NA	NA	NA	NA	NA	NA	10	88110925	0.0017	5.507e-15	718328	BMI_strict	TRUE	reported	HKLPXU	textfile	2	1	FALSE
	rs10829164	T	C	T	C	0.0151	-0.0582667	0.1468	0.141576	FALSE	FALSE	FALSE	ieu-b-5124	10	27318370	0.0975793	NA	0.550426	HPC_noukb	Hypopharyngeal cancer (excl. UKB)	Hypopharyngeal cancer (excl. UKB) || ||	TRUE	igd	NA	NA	NA	NA	NA	NA	NA	10	27318370	0.0024	2.365e-10	718703	BMI_strict	TRUE	reported	HKLPXU	textfile	2	1	TRUE
	rs10842240	C	G	C	G	0.0195	-0.0087428	0.1256	0.131899	FALSE	TRUE	FALSE	ieu-b-5124	12	24068456	0.0986452	NA	0.929377	HPC_noukb	Hypopharyngeal cancer (excl. UKB)	Hypopharyngeal cancer (excl. UKB) || ||	TRUE	igd	TRUE	rs10842240	rs7298352	C	G	G	C	12	24060075	0.0025	1.211e-14	718478	BMI_strict	TRUE	reported	HKLPXU	textfile	2	1	TRUE
	rs10858334	C	G	C	G	-0.0148	0.112858	0.8484	0.859833	FALSE	TRUE	FALSE	ieu-b-5124	9	137989785	0.101527	NA	0.266306	HPC_noukb	Hypopharyngeal cancer (excl. UKB)	Hypopharyngeal cancer (excl. UKB) || ||	TRUE	igd	NA	NA	NA	NA	NA	NA	NA	9	137989785	0.0025	4.914e-09	707975	BMI_strict	TRUE	reported	HKLPXU	textfile	2	1	TRUE
	rs10909880	T	C	T	C	-0.0135	-0.100547	0.4522	0.45	FALSE	FALSE	FALSE	ieu-b-5124	1	2727804	0.0684235	NA	0.141703	HPC_noukb	Hypopharyngeal cancer (excl. UKB)	Hypopharyngeal cancer (excl. UKB) || ||	TRUE	igd	NA	NA	NA	NA	NA	NA	NA	1	2727804	0.0016	2.205e-16	775594	BMI_strict	TRUE	reported	HKLPXU	textfile	2	1	TRUE
	rs10920336	A	G	A	G	-0.0101	0.0504664	0.5327	0.508251	FALSE	FALSE	FALSE	ieu-b-5124	1	202115945	0.0673075	NA	0.453382	HPC_noukb	Hypopharyngeal cancer (excl. UKB)	Hypopharyngeal cancer (excl. UKB) || ||	TRUE	igd	NA	NA	NA	NA	NA	NA	NA	1	202115945	0.0017	4.197e-09	704432	BMI_strict	TRUE	reported	HKLPXU	textfile	2	1	TRUE
	rs10920678	A	G	A	G	0.0149	-0.0709897	0.425	0.428103	FALSE	FALSE	FALSE	ieu-b-5124	1	190239907	0.0691774	NA	0.304798	HPC_noukb	Hypopharyngeal cancer (excl. UKB)	Hypopharyngeal cancer (excl. UKB) || ||	TRUE	igd	NA	NA	NA	NA	NA	NA	NA	1	190239907	0.0016	7.148e-20	805921	BMI_strict	TRUE	reported	HKLPXU	textfile	2	1	TRUE
	rs10929925	A	C	A	C	-0.0142	-0.0712031	0.4105	0.432007	FALSE	FALSE	FALSE	ieu-b-5124	2	6155557	0.0690457	NA	0.302426	HPC_noukb	Hypopharyngeal cancer (excl. UKB)	Hypopharyngeal cancer (excl. UKB) || ||	TRUE	igd	NA	NA	NA	NA	NA	NA	NA	2	6155557	0.0016	3.045e-18	801209	BMI_strict	TRUE	reported	HKLPXU	textfile	2	1	TRUE
	rs10938397	A	G	A	G	-0.0322	0.0828803	0.57	0.569549	FALSE	FALSE	FALSE	ieu-b-5124	4	45182527	0.0688037	NA	0.228361	HPC_noukb	Hypopharyngeal cancer (excl. UKB)	Hypopharyngeal cancer (excl. UKB) || ||	TRUE	igd	NA	NA	NA	NA	NA	NA	NA	4	45182527	0.0016	2.42e-86	805635	BMI_strict	TRUE	reported	HKLPXU	textfile	2	1	TRUE
	rs10942267	A	G	A	G	0.0148	-0.0260173	0.6927	0.69221	FALSE	FALSE	FALSE	ieu-b-5124	5	80841914	0.0725985	NA	0.720065	HPC_noukb	Hypopharyngeal cancer (excl. UKB)	Hypopharyngeal cancer (excl. UKB) || ||	TRUE	igd	NA	NA	NA	NA	NA	NA	NA	5	80841914	0.0018	6.532e-16	718640	BMI_strict	TRUE	reported	HKLPXU	textfile	2	1	TRUE
	rs10962550	C	G	C	G	0.0186	-0.0244471	0.1756	0.1849	FALSE	TRUE	FALSE	ieu-b-5124	9	16720329	0.0887548	NA	0.782973	HPC_noukb	Hypopharyngeal cancer (excl. UKB)	Hypopharyngeal cancer (excl. UKB) || ||	TRUE	igd	NA	NA	NA	NA	NA	NA	NA	9	16720329	0.0022	5.675e-17	718060	BMI_strict	TRUE	reported	HKLPXU	textfile	2	1	TRUE
	rs10968114	A	C	A	C	0.0113	0.00346988	0.5331	0.529498	FALSE	FALSE	FALSE	ieu-b-5124	9	27800007	0.0677053	NA	0.959127	HPC_noukb	Hypopharyngeal cancer (excl. UKB)	Hypopharyngeal cancer (excl. UKB) || ||	TRUE	igd	NA	NA	NA	NA	NA	NA	NA	9	27800007	0.0017	3.302e-11	718364	BMI_strict	TRUE	reported	HKLPXU	textfile	2	1	TRUE
	rs10975933	C	G	C	G	0.0114	0.0760377	0.6634	0.68511	FALSE	TRUE	FALSE	ieu-b-5124	9	6962574	0.0741827	NA	0.305361	HPC_noukb	Hypopharyngeal cancer (excl. UKB)	Hypopharyngeal cancer (excl. UKB) || ||	TRUE	igd	TRUE	rs10975933	rs10815490	G	C	C	T	9	6954557	0.0018	2.065e-10	718391	BMI_strict	TRUE	reported	HKLPXU	textfile	2	1	TRUE
	rs10992867	A	G	A	G	0.0162	0.0316045	0.2687	0.259466	FALSE	FALSE	FALSE	ieu-b-5124	9	96461013	0.0775343	NA	0.683553	HPC_noukb	Hypopharyngeal cancer (excl. UKB)	Hypopharyngeal cancer (excl. UKB) || ||	TRUE	igd	NA	NA	NA	NA	NA	NA	NA	9	96461013	0.0019	3.195e-17	718610	BMI_strict	TRUE	reported	HKLPXU	textfile	2	1	TRUE
	rs11030618	T	C	T	C	0.011	-0.104523	0.5786	0.555684	FALSE	FALSE	FALSE	ieu-b-5124	11	29243293	0.0681157	NA	0.124908	HPC_noukb	Hypopharyngeal cancer (excl. UKB)	Hypopharyngeal cancer (excl. UKB) || ||	TRUE	igd	NA	NA	NA	NA	NA	NA	NA	11	29243293	0.0017	1.673e-10	718309	BMI_strict	TRUE	reported	HKLPXU	textfile	2	1	TRUE
	rs11044430	A	T	A	T	0.0161	0.117477	0.844	0.849901	FALSE	TRUE	FALSE	ieu-b-5124	12	19287416	0.0994964	NA	0.237716	HPC_noukb	Hypopharyngeal cancer (excl. UKB)	Hypopharyngeal cancer (excl. UKB) || ||	TRUE	igd	NA	NA	NA	NA	NA	NA	NA	12	19287416	0.0023	3.765e-12	718664	BMI_strict	TRUE	reported	HKLPXU	textfile	2	1	TRUE
	rs11066188	A	G	A	G	-0.0114	-0.145632	0.3762	0.410823	FALSE	FALSE	FALSE	ieu-b-5124	12	112610714	0.0698836	NA	0.0371672	HPC_noukb	Hypopharyngeal cancer (excl. UKB)	Hypopharyngeal cancer (excl. UKB) || ||	TRUE	igd	NA	NA	NA	NA	NA	NA	NA	12	112610714	0.0016	3.053e-12	805492	BMI_strict	TRUE	reported	HKLPXU	textfile	2	1	TRUE
	rs11078883	C	G	C	G	-0.0126	-0.0183645	0.654	0.660278	FALSE	TRUE	FALSE	ieu-b-5124	17	2138828	0.0716941	NA	0.797834	HPC_noukb	Hypopharyngeal cancer (excl. UKB)	Hypopharyngeal cancer (excl. UKB) || ||	TRUE	igd	NA	NA	NA	NA	NA	NA	NA	17	2138828	0.0018	1.299e-12	718501	BMI_strict	TRUE	reported	HKLPXU	textfile	2	1	TRUE
	rs11105839	A	T	A	T	-0.0113	-0.144686	0.3729	0.374238	FALSE	TRUE	FALSE	ieu-b-5124	12	91237920	0.071196	NA	0.0421308	HPC_noukb	Hypopharyngeal cancer (excl. UKB)	Hypopharyngeal cancer (excl. UKB) || ||	TRUE	igd	NA	NA	NA	NA	NA	NA	NA	12	91237920	0.0017	1.248e-11	801313	BMI_strict	TRUE	reported	HKLPXU	textfile	2	1	TRUE
	rs11115176	T	C	T	C	0.0131	0.112063	0.7839	0.762847	FALSE	FALSE	FALSE	ieu-b-5124	12	82465797	0.0813859	NA	0.168532	HPC_noukb	Hypopharyngeal cancer (excl. UKB)	Hypopharyngeal cancer (excl. UKB) || ||	TRUE	igd	NA	NA	NA	NA	NA	NA	NA	12	82465797	0.0019	6.793e-12	805743	BMI_strict	TRUE	reported	HKLPXU	textfile	2	1	TRUE
	rs11121210	T	C	T	C	-0.0111	-0.172303	0.3445	0.367257	FALSE	FALSE	FALSE	ieu-b-5124	1	8708529	0.0709422	NA	0.0151499	HPC_noukb	Hypopharyngeal cancer (excl. UKB)	Hypopharyngeal cancer (excl. UKB) || ||	TRUE	igd	NA	NA	NA	NA	NA	NA	NA	1	8708529	0.0017	2.365e-10	718632	BMI_strict	TRUE	reported	HKLPXU	textfile	2	1	TRUE
	rs11128021	A	G	A	G	-0.0181	0.0606778	0.1615	0.145769	FALSE	FALSE	FALSE	ieu-b-5124	3	88139016	0.0928516	NA	0.513439	HPC_noukb	Hypopharyngeal cancer (excl. UKB)	Hypopharyngeal cancer (excl. UKB) || ||	TRUE	igd	NA	NA	NA	NA	NA	NA	NA	3	88139016	0.0024	1.634e-14	718699	BMI_strict	TRUE	reported	HKLPXU	textfile	2	1	TRUE
	rs11150911	A	C	A	C	0.0118	0.0982573	0.2848	0.294562	FALSE	FALSE	FALSE	ieu-b-5124	18	73498528	0.0740233	NA	0.184382	HPC_noukb	Hypopharyngeal cancer (excl. UKB)	Hypopharyngeal cancer (excl. UKB) || ||	TRUE	igd	NA	NA	NA	NA	NA	NA	NA	18	73498528	0.0018	3.718e-11	802197	BMI_strict	TRUE	reported	HKLPXU	textfile	2	1	TRUE
	rs11165643	T	C	T	C	0.0185	-0.0581099	0.5796	0.586008	FALSE	FALSE	FALSE	ieu-b-5124	1	96924097	0.0685748	NA	0.396776	HPC_noukb	Hypopharyngeal cancer (excl. UKB)	Hypopharyngeal cancer (excl. UKB) || ||	TRUE	igd	NA	NA	NA	NA	NA	NA	NA	1	96924097	0.0016	4.493e-30	805410	BMI_strict	TRUE	reported	HKLPXU	textfile	2	1	TRUE
	rs11170468	A	C	A	C	0.013	-0.0120788	0.7826	0.766805	FALSE	FALSE	FALSE	ieu-b-5124	12	39430048	0.0800094	NA	0.880001	HPC_noukb	Hypopharyngeal cancer (excl. UKB)	Hypopharyngeal cancer (excl. UKB) || ||	TRUE	igd	NA	NA	NA	NA	NA	NA	NA	12	39430048	0.0019	1.124e-11	806636	BMI_strict	TRUE	reported	HKLPXU	textfile	2	1	TRUE
	rs11218510	A	G	A	G	-0.014	0.0120066	0.3949	0.39657	FALSE	FALSE	FALSE	ieu-b-5124	11	121922587	0.0689815	NA	0.861822	HPC_noukb	Hypopharyngeal cancer (excl. UKB)	Hypopharyngeal cancer (excl. UKB) || ||	TRUE	igd	NA	NA	NA	NA	NA	NA	NA	11	121922587	0.002	6.788e-13	484680	BMI_strict	TRUE	reported	HKLPXU	textfile	2	1	TRUE
	rs112646560	T	C	T	C	0.018	0.07449	0.2119	0.220331	FALSE	FALSE	FALSE	ieu-b-5124	1	39560250	0.0822697	NA	0.365234	HPC_noukb	Hypopharyngeal cancer (excl. UKB)	Hypopharyngeal cancer (excl. UKB) || ||	TRUE	igd	NA	NA	NA	NA	NA	NA	NA	1	39560250	0.0023	1.29e-14	484680	BMI_strict	TRUE	reported	HKLPXU	textfile	2	1	TRUE
	rs1126930	C	G	C	G	0.0341	0.152649	0.0339	0.0345055	FALSE	TRUE	FALSE	ieu-b-5124	12	49399132	0.178388	NA	0.392155	HPC_noukb	Hypopharyngeal cancer (excl. UKB)	Hypopharyngeal cancer (excl. UKB) || ||	TRUE	igd	NA	NA	NA	NA	NA	NA	NA	12	49399132	0.0053	1.004e-10	484680	BMI_strict	TRUE	reported	HKLPXU	textfile	2	1	TRUE
	rs11525873	T	C	T	C	0.0232	-0.0564687	0.8995	0.904621	FALSE	FALSE	FALSE	ieu-b-5124	7	138817193	0.113655	NA	0.6193	HPC_noukb	Hypopharyngeal cancer (excl. UKB)	Hypopharyngeal cancer (excl. UKB) || ||	TRUE	igd	NA	NA	NA	NA	NA	NA	NA	7	138817193	0.0032	2.977e-13	484680	BMI_strict	TRUE	reported	HKLPXU	textfile	2	1	TRUE
	rs11538	A	G	A	G	-0.0138	0.0133861	0.8284	0.8226	FALSE	FALSE	FALSE	ieu-b-5124	22	18220831	0.088876	NA	0.880279	HPC_noukb	Hypopharyngeal cancer (excl. UKB)	Hypopharyngeal cancer (excl. UKB) || ||	TRUE	igd	NA	NA	NA	NA	NA	NA	NA	22	18220831	0.0023	1.094e-09	718441	BMI_strict	TRUE	reported	HKLPXU	textfile	2	1	TRUE
	rs11577094	T	C	T	C	0.0186	0.141253	0.0791	0.0828415	FALSE	FALSE	FALSE	ieu-b-5124	1	38026600	0.116127	NA	0.223845	HPC_noukb	Hypopharyngeal cancer (excl. UKB)	Hypopharyngeal cancer (excl. UKB) || ||	TRUE	igd	NA	NA	NA	NA	NA	NA	NA	1	38026600	0.003	3.275e-10	791496	BMI_strict	TRUE	reported	HKLPXU	textfile	2	1	TRUE
	rs1159692	A	C	A	C	0.0135	0.0190207	0.4752	0.499941	FALSE	FALSE	FALSE	ieu-b-5124	5	63977815	0.0679316	NA	0.77948	HPC_noukb	Hypopharyngeal cancer (excl. UKB)	Hypopharyngeal cancer (excl. UKB) || ||	TRUE	igd	NA	NA	NA	NA	NA	NA	NA	5	63977815	0.0017	5.543e-15	717639	BMI_strict	TRUE	reported	HKLPXU	textfile	2	1	TRUE
	rs11611246	T	G	T	G	0.0223	0.0925231	0.199	0.211643	FALSE	FALSE	FALSE	ieu-b-5124	12	939480	0.0824081	NA	0.261547	HPC_noukb	Hypopharyngeal cancer (excl. UKB)	Hypopharyngeal cancer (excl. UKB) || ||	TRUE	igd	NA	NA	NA	NA	NA	NA	NA	12	939480	0.002	2.037e-28	793063	BMI_strict	TRUE	reported	HKLPXU	textfile	2	1	TRUE
	rs11614340	T	C	T	C	-0.0117	0.00380893	0.7066	0.691913	FALSE	FALSE	FALSE	ieu-b-5124	12	133448391	0.0739193	NA	0.958905	HPC_noukb	Hypopharyngeal cancer (excl. UKB)	Hypopharyngeal cancer (excl. UKB) || ||	TRUE	igd	TRUE	rs11614340	rs77936594	C	T	A	G	12	133426483	0.0018	1.87e-10	718698	BMI_strict	TRUE	reported	HKLPXU	textfile	2	1	TRUE
	rs11615578	T	C	T	C	0.0117	0.131368	0.2575	0.247445	FALSE	FALSE	FALSE	ieu-b-5124	12	121714935	0.0787133	NA	0.0951284	HPC_noukb	Hypopharyngeal cancer (excl. UKB)	Hypopharyngeal cancer (excl. UKB) || ||	TRUE	igd	NA	NA	NA	NA	NA	NA	NA	12	121714935	0.002	3.036e-09	704912	BMI_strict	TRUE	reported	HKLPXU	textfile	2	1	TRUE
	rs11633626	A	C	A	C	-0.0157	-0.0473989	0.6313	0.623512	FALSE	FALSE	FALSE	ieu-b-5124	15	95271378	0.0699989	NA	0.498318	HPC_noukb	Hypopharyngeal cancer (excl. UKB)	Hypopharyngeal cancer (excl. UKB) || ||	TRUE	igd	NA	NA	NA	NA	NA	NA	NA	15	95271378	0.0018	7.272e-19	718669	BMI_strict	TRUE	reported	HKLPXU	textfile	2	1	TRUE
	rs11636611	T	C	T	C	0.0104	-0.144557	0.4981	0.493093	FALSE	FALSE	FALSE	ieu-b-5124	15	36391965	0.0681413	NA	0.0338852	HPC_noukb	Hypopharyngeal cancer (excl. UKB)	Hypopharyngeal cancer (excl. UKB) || ||	TRUE	igd	NA	NA	NA	NA	NA	NA	NA	15	36391965	0.0017	8.853e-10	718657	BMI_strict	TRUE	reported	HKLPXU	textfile	2	1	TRUE
	rs116374395	A	G	A	G	0.0321	0.116276	0.0348	0.0352896	FALSE	FALSE	FALSE	ieu-b-5124	5	50723410	0.170874	NA	0.496203	HPC_noukb	Hypopharyngeal cancer (excl. UKB)	Hypopharyngeal cancer (excl. UKB) || ||	TRUE	igd	NA	NA	NA	NA	NA	NA	NA	5	50723410	0.0052	7.047e-10	484680	BMI_strict	TRUE	reported	HKLPXU	textfile	2	1	TRUE
	rs11649864	A	G	A	G	0.0192	0.0130415	0.0859	0.0849441	FALSE	FALSE	FALSE	ieu-b-5124	17	56093061	0.118828	NA	0.912607	HPC_noukb	Hypopharyngeal cancer (excl. UKB)	Hypopharyngeal cancer (excl. UKB) || ||	TRUE	igd	NA	NA	NA	NA	NA	NA	NA	17	56093061	0.003	2.524e-10	690306	BMI_strict	TRUE	reported	HKLPXU	textfile	2	1	TRUE
	rs11655587	T	C	T	C	-0.021	-0.0332571	0.3572	0.351972	FALSE	FALSE	FALSE	ieu-b-5124	17	47140794	0.070985	NA	0.639421	HPC_noukb	Hypopharyngeal cancer (excl. UKB)	Hypopharyngeal cancer (excl. UKB) || ||	TRUE	igd	NA	NA	NA	NA	NA	NA	NA	17	47140794	0.002	6.874e-26	484680	BMI_strict	TRUE	reported	HKLPXU	textfile	2	1	TRUE
	rs11672660	T	C	T	C	-0.0338	0.107988	0.1871	0.205746	FALSE	FALSE	FALSE	ieu-b-5124	19	46180184	0.0811197	NA	0.183119	HPC_noukb	Hypopharyngeal cancer (excl. UKB)	Hypopharyngeal cancer (excl. UKB) || ||	TRUE	igd	NA	NA	NA	NA	NA	NA	NA	19	46180184	0.0021	6.831e-60	781854	BMI_strict	TRUE	reported	HKLPXU	textfile	2	1	TRUE
	rs11692326	T	C	T	C	0.0147	0.0554492	0.2302	0.230703	FALSE	FALSE	FALSE	ieu-b-5124	2	208263279	0.0787143	NA	0.481161	HPC_noukb	Hypopharyngeal cancer (excl. UKB)	Hypopharyngeal cancer (excl. UKB) || ||	TRUE	igd	NA	NA	NA	NA	NA	NA	NA	2	208263279	0.0019	1.685e-14	801583	BMI_strict	TRUE	reported	HKLPXU	textfile	2	1	TRUE
	rs11695013	T	C	T	C	-0.0104	0.0236916	0.632	0.640186	FALSE	FALSE	FALSE	ieu-b-5124	2	157057487	0.0717183	NA	0.741141	HPC_noukb	Hypopharyngeal cancer (excl. UKB)	Hypopharyngeal cancer (excl. UKB) || ||	TRUE	igd	NA	NA	NA	NA	NA	NA	NA	2	157057487	0.0017	2.427e-09	718650	BMI_strict	TRUE	reported	HKLPXU	textfile	2	1	TRUE
	rs11713193	A	G	A	G	0.0246	0.145151	0.5156	0.519533	FALSE	FALSE	FALSE	ieu-b-5124	3	49924424	0.0678041	NA	0.0322954	HPC_noukb	Hypopharyngeal cancer (excl. UKB)	Hypopharyngeal cancer (excl. UKB) || ||	TRUE	igd	NA	NA	NA	NA	NA	NA	NA	3	49924424	0.0017	3.02e-48	718286	BMI_strict	TRUE	reported	HKLPXU	textfile	2	1	TRUE
	rs11739877	T	C	T	C	0.0116	-0.0207185	0.6231	0.614862	FALSE	FALSE	FALSE	ieu-b-5124	5	105876806	0.068671	NA	0.762876	HPC_noukb	Hypopharyngeal cancer (excl. UKB)	Hypopharyngeal cancer (excl. UKB) || ||	TRUE	igd	NA	NA	NA	NA	NA	NA	NA	5	105876806	0.0018	4.006e-11	718632	BMI_strict	TRUE	reported	HKLPXU	textfile	2	1	TRUE
	rs11757278	T	C	T	C	0.0133	0.0372324	0.6961	0.689337	FALSE	FALSE	FALSE	ieu-b-5124	6	13180454	0.0743123	NA	0.616354	HPC_noukb	Hypopharyngeal cancer (excl. UKB)	Hypopharyngeal cancer (excl. UKB) || ||	TRUE	igd	NA	NA	NA	NA	NA	NA	NA	6	13180454	0.0019	6.916e-13	718346	BMI_strict	TRUE	reported	HKLPXU	textfile	2	1	TRUE
	rs11772246	T	C	T	C	0.0145	-0.0987638	0.8234	0.815188	FALSE	FALSE	FALSE	ieu-b-5124	7	71603692	0.0854273	NA	0.247634	HPC_noukb	Hypopharyngeal cancer (excl. UKB)	Hypopharyngeal cancer (excl. UKB) || ||	TRUE	igd	NA	NA	NA	NA	NA	NA	NA	7	71603692	0.0022	3.689e-11	718345	BMI_strict	TRUE	reported	HKLPXU	textfile	2	1	TRUE
	rs11782074	T	G	T	G	0.0124	-0.0463502	0.3675	0.376932	FALSE	FALSE	FALSE	ieu-b-5124	8	142617096	0.0718103	NA	0.518633	HPC_noukb	Hypopharyngeal cancer (excl. UKB)	Hypopharyngeal cancer (excl. UKB) || ||	TRUE	igd	NA	NA	NA	NA	NA	NA	NA	8	142617096	0.0018	4.238e-12	717837	BMI_strict	TRUE	reported	HKLPXU	textfile	2	1	TRUE
	rs118081010	T	C	T	C	0.0518	-0.526372	0.0165	0.0139718	FALSE	FALSE	FALSE	ieu-b-5124	11	46174948	0.343157	NA	0.125051	HPC_noukb	Hypopharyngeal cancer (excl. UKB)	Hypopharyngeal cancer (excl. UKB) || ||	TRUE	igd	NA	NA	NA	NA	NA	NA	NA	11	46174948	0.0075	5.277e-12	484680	BMI_strict	TRUE	reported	HKLPXU	textfile	2	1	TRUE
	rs11882409	A	C	A	C	0.0121	-0.0646395	0.303	0.28676	FALSE	FALSE	FALSE	ieu-b-5124	19	34019685	0.0762438	NA	0.396549	HPC_noukb	Hypopharyngeal cancer (excl. UKB)	Hypopharyngeal cancer (excl. UKB) || ||	TRUE	igd	NA	NA	NA	NA	NA	NA	NA	19	34019685	0.0019	3.309e-10	718526	BMI_strict	TRUE	reported	HKLPXU	textfile	2	1	TRUE
	rs11902450	T	C	T	C	0.0167	0.0788263	0.1052	0.104207	FALSE	FALSE	FALSE	ieu-b-5124	2	12845368	0.107539	NA	0.463556	HPC_noukb	Hypopharyngeal cancer (excl. UKB)	Hypopharyngeal cancer (excl. UKB) || ||	TRUE	igd	NA	NA	NA	NA	NA	NA	NA	2	12845368	0.0027	1.061e-09	718624	BMI_strict	TRUE	reported	HKLPXU	textfile	2	1	TRUE
	rs11915371	A	C	A	C	-0.0154	0.0331983	0.8019	0.793366	FALSE	FALSE	FALSE	ieu-b-5124	3	70539559	0.084889	NA	0.695738	HPC_noukb	Hypopharyngeal cancer (excl. UKB)	Hypopharyngeal cancer (excl. UKB) || ||	TRUE	igd	NA	NA	NA	NA	NA	NA	NA	3	70539559	0.0021	2.288e-13	718311	BMI_strict	TRUE	reported	HKLPXU	textfile	2	1	TRUE
	rs11921432	T	C	T	C	-0.0189	0.0470715	0.8906	0.888732	FALSE	FALSE	FALSE	ieu-b-5124	3	35117776	0.108696	NA	0.664975	HPC_noukb	Hypopharyngeal cancer (excl. UKB)	Hypopharyngeal cancer (excl. UKB) || ||	TRUE	igd	NA	NA	NA	NA	NA	NA	NA	3	35117776	0.0027	5.382e-12	706646	BMI_strict	TRUE	reported	HKLPXU	textfile	2	1	TRUE
	rs12072739	A	G	A	G	-0.0169	-0.193925	0.7762	0.775427	FALSE	FALSE	FALSE	ieu-b-5124	1	98315893	0.0780289	NA	0.0129443	HPC_noukb	Hypopharyngeal cancer (excl. UKB)	Hypopharyngeal cancer (excl. UKB) || ||	TRUE	igd	NA	NA	NA	NA	NA	NA	NA	1	98315893	0.0023	1.502e-13	484680	BMI_strict	TRUE	reported	HKLPXU	textfile	2	1	TRUE
	rs12098284	T	C	T	C	0.0184	-0.0478469	0.1212	0.127087	FALSE	FALSE	FALSE	ieu-b-5124	10	76047464	0.102308	NA	0.640016	HPC_noukb	Hypopharyngeal cancer (excl. UKB)	Hypopharyngeal cancer (excl. UKB) || ||	TRUE	igd	NA	NA	NA	NA	NA	NA	NA	10	76047464	0.0026	9.868e-13	714745	BMI_strict	TRUE	reported	HKLPXU	textfile	2	1	TRUE
	rs12140153	T	G	T	G	-0.0353	-0.0552276	0.0911	0.0953073	FALSE	FALSE	FALSE	ieu-b-5124	1	62579891	0.119248	NA	0.64327	HPC_noukb	Hypopharyngeal cancer (excl. UKB)	Hypopharyngeal cancer (excl. UKB) || ||	TRUE	igd	NA	NA	NA	NA	NA	NA	NA	1	62579891	0.0034	1.443e-25	484680	BMI_strict	TRUE	reported	HKLPXU	textfile	2	1	TRUE
	rs12150665	T	C	T	C	0.0168	0.110973	0.5931	0.593481	FALSE	FALSE	FALSE	ieu-b-5124	17	34914787	0.0705565	NA	0.115759	HPC_noukb	Hypopharyngeal cancer (excl. UKB)	Hypopharyngeal cancer (excl. UKB) || ||	TRUE	igd	NA	NA	NA	NA	NA	NA	NA	17	34914787	0.0016	1.737e-24	806685	BMI_strict	TRUE	reported	HKLPXU	textfile	2	1	TRUE
	rs12259464	A	G	A	G	0.0109	-0.0123354	0.4811	0.477486	FALSE	FALSE	FALSE	ieu-b-5124	10	53680099	0.0677122	NA	0.855446	HPC_noukb	Hypopharyngeal cancer (excl. UKB)	Hypopharyngeal cancer (excl. UKB) || ||	TRUE	igd	NA	NA	NA	NA	NA	NA	NA	10	53680099	0.0017	1.478e-10	716686	BMI_strict	TRUE	reported	HKLPXU	textfile	2	1	TRUE
	rs12282785	A	C	A	C	-0.0157	0.0418869	0.2204	0.218642	FALSE	FALSE	FALSE	ieu-b-5124	11	76476030	0.0807995	NA	0.604175	HPC_noukb	Hypopharyngeal cancer (excl. UKB)	Hypopharyngeal cancer (excl. UKB) || ||	TRUE	igd	NA	NA	NA	NA	NA	NA	NA	11	76476030	0.0023	1.434e-11	484680	BMI_strict	TRUE	reported	HKLPXU	textfile	2	1	TRUE
	rs12286929	A	G	A	G	-0.0177	0.011058	0.5007	0.468375	FALSE	FALSE	FALSE	ieu-b-5124	11	115022404	0.0675112	NA	0.869892	HPC_noukb	Hypopharyngeal cancer (excl. UKB)	Hypopharyngeal cancer (excl. UKB) || ||	TRUE	igd	NA	NA	NA	NA	NA	NA	NA	11	115022404	0.0016	1.925e-27	806583	BMI_strict	TRUE	reported	HKLPXU	textfile	2	1	TRUE
	rs12334877	A	G	A	G	-0.0144	-0.0335375	0.1913	0.19848	FALSE	FALSE	FALSE	ieu-b-5124	8	67194171	0.0857861	NA	0.695839	HPC_noukb	Hypopharyngeal cancer (excl. UKB)	Hypopharyngeal cancer (excl. UKB) || ||	TRUE	igd	NA	NA	NA	NA	NA	NA	NA	8	67194171	0.0021	2.173e-11	717934	BMI_strict	TRUE	reported	HKLPXU	textfile	2	1	TRUE
	rs12364470	T	G	T	G	-0.0187	-0.0864597	0.8535	0.834921	FALSE	FALSE	FALSE	ieu-b-5124	11	134601012	0.090969	NA	0.341894	HPC_noukb	Hypopharyngeal cancer (excl. UKB)	Hypopharyngeal cancer (excl. UKB) || ||	TRUE	igd	NA	NA	NA	NA	NA	NA	NA	11	134601012	0.0022	2.18e-17	799515	BMI_strict	TRUE	reported	HKLPXU	textfile	2	1	TRUE
	rs12369179	T	C	T	C	-0.034	-0.115476	0.085	0.0940521	FALSE	FALSE	FALSE	ieu-b-5124	12	122963550	0.123025	NA	0.347919	HPC_noukb	Hypopharyngeal cancer (excl. UKB)	Hypopharyngeal cancer (excl. UKB) || ||	TRUE	igd	NA	NA	NA	NA	NA	NA	NA	12	122963550	0.0031	2.324e-28	703003	BMI_strict	TRUE	reported	HKLPXU	textfile	2	1	TRUE
	rs12421848	A	G	A	G	-0.0141	-0.0502371	0.3962	0.381901	FALSE	FALSE	FALSE	ieu-b-5124	11	892089	0.0711691	NA	0.48026	HPC_noukb	Hypopharyngeal cancer (excl. UKB)	Hypopharyngeal cancer (excl. UKB) || ||	TRUE	igd	TRUE	rs12421848	rs7952102	A	G	C	T	11	891338	0.0019	3.993e-13	484680	BMI_strict	TRUE	reported	HKLPXU	textfile	2	1	TRUE
	rs12429545	A	G	A	G	0.0313	0.143735	0.1218	0.124537	FALSE	FALSE	FALSE	ieu-b-5124	13	54102206	0.0977775	NA	0.141555	HPC_noukb	Hypopharyngeal cancer (excl. UKB)	Hypopharyngeal cancer (excl. UKB) || ||	TRUE	igd	NA	NA	NA	NA	NA	NA	NA	13	54102206	0.0024	1.419e-37	797614	BMI_strict	TRUE	reported	HKLPXU	textfile	2	1	TRUE
	rs12439632	C	G	C	G	0.0145	-0.126018	0.1682	0.151478	FALSE	TRUE	FALSE	ieu-b-5124	15	59103963	0.0998727	NA	0.207027	HPC_noukb	Hypopharyngeal cancer (excl. UKB)	Hypopharyngeal cancer (excl. UKB) || ||	TRUE	igd	NA	NA	NA	NA	NA	NA	NA	15	59103963	0.0023	3.675e-10	718615	BMI_strict	TRUE	reported	HKLPXU	textfile	2	1	TRUE
	rs12448257	A	G	A	G	0.0161	0.00548663	0.2185	0.208987	FALSE	FALSE	FALSE	ieu-b-5124	16	3599655	0.0841879	NA	0.948038	HPC_noukb	Hypopharyngeal cancer (excl. UKB)	Hypopharyngeal cancer (excl. UKB) || ||	TRUE	igd	NA	NA	NA	NA	NA	NA	NA	16	3599655	0.002	9.035e-16	797946	BMI_strict	TRUE	reported	HKLPXU	textfile	2	1	TRUE
	rs12462975	A	G	A	G	0.0193	-0.236257	0.3243	0.318977	FALSE	FALSE	FALSE	ieu-b-5124	19	30277729	0.0760432	NA	0.00189069	HPC_noukb	Hypopharyngeal cancer (excl. UKB)	Hypopharyngeal cancer (excl. UKB) || ||	TRUE	igd	TRUE	rs12462975	rs113701136	A	G	T	C	19	30272202	0.0018	1.474e-25	717340	BMI_strict	TRUE	reported	HKLPXU	textfile	2	1	TRUE
	rs12527426	A	G	A	G	0.015	-0.0128493	0.3	0.290829	FALSE	FALSE	FALSE	ieu-b-5124	6	153392908	0.0748926	NA	0.863776	HPC_noukb	Hypopharyngeal cancer (excl. UKB)	Hypopharyngeal cancer (excl. UKB) || ||	TRUE	igd	TRUE	rs12527426	rs9478384	A	G	C	T	6	153392002	0.0019	5.544e-16	717888	BMI_strict	TRUE	reported	HKLPXU	textfile	2	1	TRUE
	rs12594043	C	G	C	G	0.0102	-0.0807499	0.5205	0.519155	FALSE	TRUE	TRUE	ieu-b-5124	15	27034988	0.0680685	NA	0.235503	HPC_noukb	Hypopharyngeal cancer (excl. UKB)	Hypopharyngeal cancer (excl. UKB) || ||	TRUE	igd	NA	NA	NA	NA	NA	NA	NA	15	27034988	0.0017	1.312e-09	718508	BMI_strict	TRUE	reported	HKLPXU	textfile	2	1	FALSE
	rs12602912	T	C	T	C	0.0166	0.0905344	0.212	0.198584	FALSE	FALSE	FALSE	ieu-b-5124	17	65870073	0.0831189	NA	0.276059	HPC_noukb	Hypopharyngeal cancer (excl. UKB)	Hypopharyngeal cancer (excl. UKB) || ||	TRUE	igd	NA	NA	NA	NA	NA	NA	NA	17	65870073	0.002	2.899e-16	788746	BMI_strict	TRUE	reported	HKLPXU	textfile	2	1	TRUE
	rs12628051	T	C	T	C	0.0161	0.0533991	0.6407	0.653468	FALSE	FALSE	FALSE	ieu-b-5124	22	40654276	0.0713444	NA	0.454177	HPC_noukb	Hypopharyngeal cancer (excl. UKB)	Hypopharyngeal cancer (excl. UKB) || ||	TRUE	igd	NA	NA	NA	NA	NA	NA	NA	22	40654276	0.0018	2.9e-19	715009	BMI_strict	TRUE	reported	HKLPXU	textfile	2	1	TRUE
	rs12628891	T	C	T	C	-0.0115	0.0168148	0.3186	0.31999	FALSE	FALSE	FALSE	ieu-b-5124	22	38317137	0.0732916	NA	0.81854	HPC_noukb	Hypopharyngeal cancer (excl. UKB)	Hypopharyngeal cancer (excl. UKB) || ||	TRUE	igd	NA	NA	NA	NA	NA	NA	NA	22	38317137	0.0019	5.852e-10	718155	BMI_strict	TRUE	reported	HKLPXU	textfile	2	1	TRUE
	rs12635553	A	T	A	T	0.0099	0.0572938	0.486	0.495963	FALSE	TRUE	TRUE	ieu-b-5124	3	171116603	0.0686341	NA	0.403846	HPC_noukb	Hypopharyngeal cancer (excl. UKB)	Hypopharyngeal cancer (excl. UKB) || ||	TRUE	igd	TRUE	rs12635553	rs10936682	T	A	G	A	3	171113714	0.0017	4.102e-09	714859	BMI_strict	TRUE	reported	HKLPXU	textfile	2	1	FALSE
	rs12636480	T	G	T	G	0.0128	-0.0207971	0.3507	0.359636	FALSE	FALSE	FALSE	ieu-b-5124	3	82719412	0.0702785	NA	0.767287	HPC_noukb	Hypopharyngeal cancer (excl. UKB)	Hypopharyngeal cancer (excl. UKB) || ||	TRUE	igd	NA	NA	NA	NA	NA	NA	NA	3	82719412	0.0018	6.96e-13	718231	BMI_strict	TRUE	reported	HKLPXU	textfile	2	1	TRUE
	rs12652212	A	G	A	G	-0.0131	0.00820488	0.5611	0.574804	FALSE	FALSE	FALSE	ieu-b-5124	5	88808594	0.0685206	NA	0.904687	HPC_noukb	Hypopharyngeal cancer (excl. UKB)	Hypopharyngeal cancer (excl. UKB) || ||	TRUE	igd	NA	NA	NA	NA	NA	NA	NA	5	88808594	0.0016	1.633e-15	806515	BMI_strict	TRUE	reported	HKLPXU	textfile	2	1	TRUE
	rs1268065	A	G	A	G	-0.01	0.100281	0.5	0.474641	FALSE	FALSE	FALSE	ieu-b-5124	6	126042783	0.0670206	NA	0.134582	HPC_noukb	Hypopharyngeal cancer (excl. UKB)	Hypopharyngeal cancer (excl. UKB) || ||	TRUE	igd	NA	NA	NA	NA	NA	NA	NA	6	126042783	0.0016	7.119e-10	786277	BMI_strict	TRUE	reported	HKLPXU	textfile	2	1	TRUE
	rs12680842	A	G	A	G	0.0142	-0.0628637	0.6839	0.678244	FALSE	FALSE	FALSE	ieu-b-5124	8	95582606	0.0716312	NA	0.380159	HPC_noukb	Hypopharyngeal cancer (excl. UKB)	Hypopharyngeal cancer (excl. UKB) || ||	TRUE	igd	NA	NA	NA	NA	NA	NA	NA	8	95582606	0.0017	3.411e-16	800300	BMI_strict	TRUE	reported	HKLPXU	textfile	2	1	TRUE
	rs12681792	A	C	A	C	0.015	0.00406699	0.2024	0.19388	FALSE	FALSE	FALSE	ieu-b-5124	8	62054463	0.0860046	NA	0.962284	HPC_noukb	Hypopharyngeal cancer (excl. UKB)	Hypopharyngeal cancer (excl. UKB) || ||	TRUE	igd	NA	NA	NA	NA	NA	NA	NA	8	62054463	0.0021	2.883e-12	717806	BMI_strict	TRUE	reported	HKLPXU	textfile	2	1	TRUE
	rs12692596	T	C	T	C	0.012	0.0245641	0.3618	0.371748	FALSE	FALSE	FALSE	ieu-b-5124	2	161265910	0.0698935	NA	0.72525	HPC_noukb	Hypopharyngeal cancer (excl. UKB)	Hypopharyngeal cancer (excl. UKB) || ||	TRUE	igd	NA	NA	NA	NA	NA	NA	NA	2	161265910	0.0017	1.032e-12	806739	BMI_strict	TRUE	reported	HKLPXU	textfile	2	1	TRUE
	rs12714199	T	C	T	C	-0.0141	0.0174335	0.6146	0.624798	FALSE	FALSE	FALSE	ieu-b-5124	2	86812549	0.0702292	NA	0.803951	HPC_noukb	Hypopharyngeal cancer (excl. UKB)	Hypopharyngeal cancer (excl. UKB) || ||	TRUE	igd	NA	NA	NA	NA	NA	NA	NA	2	86812549	0.0017	3.219e-16	718671	BMI_strict	TRUE	reported	HKLPXU	textfile	2	1	TRUE
	rs12765914	T	C	T	C	0.0226	0.00950208	0.0801	0.0870409	FALSE	FALSE	FALSE	ieu-b-5124	10	34013507	0.122595	NA	0.93822	HPC_noukb	Hypopharyngeal cancer (excl. UKB)	Hypopharyngeal cancer (excl. UKB) || ||	TRUE	igd	NA	NA	NA	NA	NA	NA	NA	10	34013507	0.0031	1.96e-13	718619	BMI_strict	TRUE	reported	HKLPXU	textfile	2	1	TRUE
	rs12868881	A	T	A	T	0.0138	0.0231502	0.4066	0.420632	FALSE	TRUE	TRUE	ieu-b-5124	13	112218924	0.0689757	NA	0.73715	HPC_noukb	Hypopharyngeal cancer (excl. UKB)	Hypopharyngeal cancer (excl. UKB) || ||	TRUE	igd	NA	NA	NA	NA	NA	NA	NA	13	112218924	0.0017	1.401e-15	718650	BMI_strict	TRUE	reported	HKLPXU	textfile	2	1	FALSE
	rs12888545	A	G	A	G	-0.0133	0.0487488	0.7464	0.750233	FALSE	FALSE	FALSE	ieu-b-5124	14	88308044	0.0784024	NA	0.534089	HPC_noukb	Hypopharyngeal cancer (excl. UKB)	Hypopharyngeal cancer (excl. UKB) || ||	TRUE	igd	NA	NA	NA	NA	NA	NA	NA	14	88308044	0.002	1.764e-11	718431	BMI_strict	TRUE	reported	HKLPXU	textfile	2	1	TRUE
	rs12914623	C	G	C	G	-0.0159	0.0319604	0.2722	0.260007	FALSE	TRUE	FALSE	ieu-b-5124	15	80993570	0.076959	NA	0.677929	HPC_noukb	Hypopharyngeal cancer (excl. UKB)	Hypopharyngeal cancer (excl. UKB) || ||	TRUE	igd	NA	NA	NA	NA	NA	NA	NA	15	80993570	0.0019	1.999e-16	718054	BMI_strict	TRUE	reported	HKLPXU	textfile	2	1	TRUE
	rs12922346	C	G	C	G	0.0133	0.0310873	0.2641	0.271404	FALSE	TRUE	FALSE	ieu-b-5124	16	82438337	0.0754948	NA	0.6805	HPC_noukb	Hypopharyngeal cancer (excl. UKB)	Hypopharyngeal cancer (excl. UKB) || ||	TRUE	igd	NA	NA	NA	NA	NA	NA	NA	16	82438337	0.002	1.482e-11	716945	BMI_strict	TRUE	reported	HKLPXU	textfile	2	1	TRUE
	rs12926250	T	G	T	G	0.018	-0.025874	0.1051	0.0996891	FALSE	FALSE	FALSE	ieu-b-5124	16	72213316	0.114209	NA	0.820773	HPC_noukb	Hypopharyngeal cancer (excl. UKB)	Hypopharyngeal cancer (excl. UKB) || ||	TRUE	igd	NA	NA	NA	NA	NA	NA	NA	16	72213316	0.0028	1.784e-10	718628	BMI_strict	TRUE	reported	HKLPXU	textfile	2	1	TRUE
	rs12939549	A	G	A	G	0.018	0.0313184	0.5572	0.560223	FALSE	FALSE	FALSE	ieu-b-5124	17	78611724	0.0683836	NA	0.646965	HPC_noukb	Hypopharyngeal cancer (excl. UKB)	Hypopharyngeal cancer (excl. UKB) || ||	TRUE	igd	NA	NA	NA	NA	NA	NA	NA	17	78611724	0.0016	3.681e-28	806064	BMI_strict	TRUE	reported	HKLPXU	textfile	2	1	TRUE
	rs1296328	A	C	A	C	0.0166	0.0502385	0.4464	0.447162	FALSE	FALSE	FALSE	ieu-b-5124	4	137083193	0.0682916	NA	0.461946	HPC_noukb	Hypopharyngeal cancer (excl. UKB)	Hypopharyngeal cancer (excl. UKB) || ||	TRUE	igd	NA	NA	NA	NA	NA	NA	NA	4	137083193	0.0017	3.486e-22	717741	BMI_strict	TRUE	reported	HKLPXU	textfile	2	1	TRUE
	rs12981256	A	G	A	G	0.0151	-0.0814896	0.5284	0.521393	FALSE	FALSE	FALSE	ieu-b-5124	19	1865901	0.070624	NA	0.248561	HPC_noukb	Hypopharyngeal cancer (excl. UKB)	Hypopharyngeal cancer (excl. UKB) || ||	TRUE	igd	NA	NA	NA	NA	NA	NA	NA	19	1865901	0.0017	1.432e-18	715373	BMI_strict	TRUE	reported	HKLPXU	textfile	2	1	TRUE
	rs12987009	A	T	A	T	-0.0109	0.0722224	0.5851	0.56997	FALSE	TRUE	TRUE	ieu-b-5124	2	219658170	0.0687967	NA	0.293813	HPC_noukb	Hypopharyngeal cancer (excl. UKB)	Hypopharyngeal cancer (excl. UKB) || ||	TRUE	igd	NA	NA	NA	NA	NA	NA	NA	2	219658170	0.0017	1.834e-10	717653	BMI_strict	TRUE	reported	HKLPXU	textfile	2	1	FALSE
	rs13021737	A	G	A	G	-0.0578	-0.122394	0.1567	0.172162	FALSE	FALSE	FALSE	ieu-b-5124	2	632348	0.0932549	NA	0.189363	HPC_noukb	Hypopharyngeal cancer (excl. UKB)	Hypopharyngeal cancer (excl. UKB) || ||	TRUE	igd	NA	NA	NA	NA	NA	NA	NA	2	632348	0.0021	2.89e-161	802967	BMI_strict	TRUE	reported	HKLPXU	textfile	2	1	TRUE
	rs13033310	A	G	A	G	0.0146	0.00052679	0.2519	0.250835	FALSE	FALSE	FALSE	ieu-b-5124	2	133523605	0.077938	NA	0.994607	HPC_noukb	Hypopharyngeal cancer (excl. UKB)	Hypopharyngeal cancer (excl. UKB) || ||	TRUE	igd	NA	NA	NA	NA	NA	NA	NA	2	133523605	0.0022	3.395e-11	484680	BMI_strict	TRUE	reported	HKLPXU	textfile	2	1	TRUE
	rs13047416	C	G	C	G	0.0152	-0.0612749	0.6263	0.622627	FALSE	TRUE	FALSE	ieu-b-5124	21	40309436	0.0691959	NA	0.375872	HPC_noukb	Hypopharyngeal cancer (excl. UKB)	Hypopharyngeal cancer (excl. UKB) || ||	TRUE	igd	NA	NA	NA	NA	NA	NA	NA	21	40309436	0.0018	6.934e-18	717914	BMI_strict	TRUE	reported	HKLPXU	textfile	2	1	TRUE
	rs13107325	T	C	T	C	0.0468	-0.393853	0.082	0.0764238	FALSE	FALSE	FALSE	ieu-b-5124	4	103188709	0.144465	NA	0.00640501	HPC_noukb	Hypopharyngeal cancer (excl. UKB)	Hypopharyngeal cancer (excl. UKB) || ||	TRUE	igd	NA	NA	NA	NA	NA	NA	NA	4	103188709	0.0032	3.805e-47	806141	BMI_strict	TRUE	reported	HKLPXU	textfile	2	1	TRUE
	rs13110266	A	G	A	G	-0.0124	0.0418911	0.4037	0.409184	FALSE	FALSE	FALSE	ieu-b-5124	4	162129844	0.0688818	NA	0.543081	HPC_noukb	Hypopharyngeal cancer (excl. UKB)	Hypopharyngeal cancer (excl. UKB) || ||	TRUE	igd	NA	NA	NA	NA	NA	NA	NA	4	162129844	0.0016	3.956e-14	806749	BMI_strict	TRUE	reported	HKLPXU	textfile	2	1	TRUE
	rs13174863	A	G	A	G	-0.0197	0.0195848	0.8542	0.852793	FALSE	FALSE	FALSE	ieu-b-5124	5	139080745	0.0961633	NA	0.838618	HPC_noukb	Hypopharyngeal cancer (excl. UKB)	Hypopharyngeal cancer (excl. UKB) || ||	TRUE	igd	NA	NA	NA	NA	NA	NA	NA	5	139080745	0.0023	1.939e-17	793550	BMI_strict	TRUE	reported	HKLPXU	textfile	2	1	TRUE
	rs13186194	T	C	T	C	0.01	-0.0159741	0.6169	0.625256	FALSE	FALSE	FALSE	ieu-b-5124	5	60795485	0.0692534	NA	0.817577	HPC_noukb	Hypopharyngeal cancer (excl. UKB)	Hypopharyngeal cancer (excl. UKB) || ||	TRUE	igd	NA	NA	NA	NA	NA	NA	NA	5	60795485	0.0017	2.197e-09	806614	BMI_strict	TRUE	reported	HKLPXU	textfile	2	1	TRUE
	rs13191362	A	G	A	G	0.0235	0.161814	0.8572	0.877211	FALSE	FALSE	FALSE	ieu-b-5124	6	163033350	0.106617	NA	0.129087	HPC_noukb	Hypopharyngeal cancer (excl. UKB)	Hypopharyngeal cancer (excl. UKB) || ||	TRUE	igd	NA	NA	NA	NA	NA	NA	NA	6	163033350	0.0025	4.079e-21	806582	BMI_strict	TRUE	reported	HKLPXU	textfile	2	1	TRUE
	rs13240600	A	G	A	G	0.018	0.084594	0.8343	0.842512	FALSE	FALSE	FALSE	ieu-b-5124	7	99064466	0.0952005	NA	0.374225	HPC_noukb	Hypopharyngeal cancer (excl. UKB)	Hypopharyngeal cancer (excl. UKB) || ||	TRUE	igd	NA	NA	NA	NA	NA	NA	NA	7	99064466	0.0022	7.904e-16	718601	BMI_strict	TRUE	reported	HKLPXU	textfile	2	1	TRUE
	rs13245051	A	G	A	G	0.015	0.201895	0.4557	0.449445	FALSE	FALSE	FALSE	ieu-b-5124	7	113362799	0.0680747	NA	0.00301919	HPC_noukb	Hypopharyngeal cancer (excl. UKB)	Hypopharyngeal cancer (excl. UKB) || ||	TRUE	igd	NA	NA	NA	NA	NA	NA	NA	7	113362799	0.0017	1.121e-18	714046	BMI_strict	TRUE	reported	HKLPXU	textfile	2	1	TRUE
	rs13263601	A	C	A	C	-0.0145	0.0966263	0.6585	0.647319	FALSE	FALSE	FALSE	ieu-b-5124	8	14095900	0.0711686	NA	0.174556	HPC_noukb	Hypopharyngeal cancer (excl. UKB)	Hypopharyngeal cancer (excl. UKB) || ||	TRUE	igd	NA	NA	NA	NA	NA	NA	NA	8	14095900	0.0018	4.867e-16	714980	BMI_strict	TRUE	reported	HKLPXU	textfile	2	1	TRUE
	rs1327259	A	G	A	G	0.0157	-0.0234185	0.6096	0.611584	FALSE	FALSE	FALSE	ieu-b-5124	6	51177811	0.0689187	NA	0.734008	HPC_noukb	Hypopharyngeal cancer (excl. UKB)	Hypopharyngeal cancer (excl. UKB) || ||	TRUE	igd	NA	NA	NA	NA	NA	NA	NA	6	51177811	0.0017	1.465e-19	718295	BMI_strict	TRUE	reported	HKLPXU	textfile	2	1	TRUE
	rs13296413	T	C	T	C	-0.0148	0.136357	0.3811	0.369029	FALSE	FALSE	FALSE	ieu-b-5124	9	37258105	0.0689789	NA	0.0480662	HPC_noukb	Hypopharyngeal cancer (excl. UKB)	Hypopharyngeal cancer (excl. UKB) || ||	TRUE	igd	NA	NA	NA	NA	NA	NA	NA	9	37258105	0.0017	2.49e-17	718610	BMI_strict	TRUE	reported	HKLPXU	textfile	2	1	TRUE
	rs1346841	A	G	A	G	-0.0126	-0.0485235	0.4116	0.399749	FALSE	FALSE	FALSE	ieu-b-5124	4	65651730	0.068408	NA	0.478123	HPC_noukb	Hypopharyngeal cancer (excl. UKB)	Hypopharyngeal cancer (excl. UKB) || ||	TRUE	igd	NA	NA	NA	NA	NA	NA	NA	4	65651730	0.0017	3.183e-13	718293	BMI_strict	TRUE	reported	HKLPXU	textfile	2	1	TRUE
	rs1350430	T	C	T	C	-0.0125	0.14955	0.5328	0.540015	FALSE	FALSE	FALSE	ieu-b-5124	12	41819215	0.0680366	NA	0.0279428	HPC_noukb	Hypopharyngeal cancer (excl. UKB)	Hypopharyngeal cancer (excl. UKB) || ||	TRUE	igd	NA	NA	NA	NA	NA	NA	NA	12	41819215	0.0017	2.075e-13	718510	BMI_strict	TRUE	reported	HKLPXU	textfile	2	1	TRUE
	rs1356506	T	C	T	C	0.0137	-0.15672	0.6287	0.628893	FALSE	FALSE	FALSE	ieu-b-5124	18	40708038	0.0694321	NA	0.0239972	HPC_noukb	Hypopharyngeal cancer (excl. UKB)	Hypopharyngeal cancer (excl. UKB) || ||	TRUE	igd	NA	NA	NA	NA	NA	NA	NA	18	40708038	0.0018	8.394e-15	718632	BMI_strict	TRUE	reported	HKLPXU	textfile	2	1	TRUE
	rs1358980	T	C	T	C	-0.0129	-0.0760425	0.4735	0.473297	FALSE	FALSE	FALSE	ieu-b-5124	6	43764551	0.0683518	NA	0.265916	HPC_noukb	Hypopharyngeal cancer (excl. UKB)	Hypopharyngeal cancer (excl. UKB) || ||	TRUE	igd	NA	NA	NA	NA	NA	NA	NA	6	43764551	0.0017	5.151e-15	797930	BMI_strict	TRUE	reported	HKLPXU	textfile	2	1	TRUE
	rs1383592	A	G	A	G	0.0122	-0.0933485	0.212	0.203636	FALSE	FALSE	FALSE	ieu-b-5124	8	106430676	0.0862036	NA	0.27886	HPC_noukb	Hypopharyngeal cancer (excl. UKB)	Hypopharyngeal cancer (excl. UKB) || ||	TRUE	igd	NA	NA	NA	NA	NA	NA	NA	8	106430676	0.0021	4.92e-09	718467	BMI_strict	TRUE	reported	HKLPXU	textfile	2	1	TRUE
	rs1409818	T	C	T	C	0.0195	0.130874	0.1074	0.103119	FALSE	FALSE	FALSE	ieu-b-5124	20	21381121	0.105189	NA	0.213435	HPC_noukb	Hypopharyngeal cancer (excl. UKB)	Hypopharyngeal cancer (excl. UKB) || ||	TRUE	igd	NA	NA	NA	NA	NA	NA	NA	20	21381121	0.0028	2.589e-12	718603	BMI_strict	TRUE	reported	HKLPXU	textfile	2	1	TRUE
	rs1412235	C	G	C	G	0.0237	0.0525136	0.3151	0.318129	FALSE	TRUE	FALSE	ieu-b-5124	9	28410996	0.0726267	NA	0.469642	HPC_noukb	Hypopharyngeal cancer (excl. UKB)	Hypopharyngeal cancer (excl. UKB) || ||	TRUE	igd	NA	NA	NA	NA	NA	NA	NA	9	28410996	0.0017	2.277e-42	804074	BMI_strict	TRUE	reported	HKLPXU	textfile	2	1	TRUE
	rs1421334	A	C	A	C	0.0135	-0.0470745	0.4546	0.458338	FALSE	FALSE	FALSE	ieu-b-5124	8	30865733	0.0683443	NA	0.490959	HPC_noukb	Hypopharyngeal cancer (excl. UKB)	Hypopharyngeal cancer (excl. UKB) || ||	TRUE	igd	NA	NA	NA	NA	NA	NA	NA	8	30865733	0.0017	3.111e-15	717941	BMI_strict	TRUE	reported	HKLPXU	textfile	2	1	TRUE
	rs1436344	C	G	C	G	0.0147	0.00557687	0.5703	0.588624	FALSE	TRUE	TRUE	ieu-b-5124	3	104606144	0.0687792	NA	0.935375	HPC_noukb	Hypopharyngeal cancer (excl. UKB)	Hypopharyngeal cancer (excl. UKB) || ||	TRUE	igd	NA	NA	NA	NA	NA	NA	NA	3	104606144	0.0017	1.07e-17	718660	BMI_strict	TRUE	reported	HKLPXU	textfile	2	1	FALSE
	rs1437842	A	G	A	G	-0.0106	-0.0403296	0.4907	0.478301	FALSE	FALSE	FALSE	ieu-b-5124	4	173597016	0.0673937	NA	0.549561	HPC_noukb	Hypopharyngeal cancer (excl. UKB)	Hypopharyngeal cancer (excl. UKB) || ||	TRUE	igd	NA	NA	NA	NA	NA	NA	NA	4	173597016	0.0017	8.494e-10	705988	BMI_strict	TRUE	reported	HKLPXU	textfile	2	1	TRUE
	rs1441264	A	G	A	G	0.0174	0.0359242	0.5846	0.597912	FALSE	FALSE	FALSE	ieu-b-5124	13	79580919	0.0687836	NA	0.601476	HPC_noukb	Hypopharyngeal cancer (excl. UKB)	Hypopharyngeal cancer (excl. UKB) || ||	TRUE	igd	NA	NA	NA	NA	NA	NA	NA	13	79580919	0.0017	7.603e-25	794966	BMI_strict	TRUE	reported	HKLPXU	textfile	2	1	TRUE
	rs1451077	A	G	A	G	-0.0169	-0.0597622	0.5776	0.574702	FALSE	FALSE	FALSE	ieu-b-5124	2	147901207	0.0681584	NA	0.380588	HPC_noukb	Hypopharyngeal cancer (excl. UKB)	Hypopharyngeal cancer (excl. UKB) || ||	TRUE	igd	NA	NA	NA	NA	NA	NA	NA	2	147901207	0.0019	1.426e-18	484680	BMI_strict	TRUE	reported	HKLPXU	textfile	2	1	TRUE
	rs147568678	T	C	T	C	0.0134	-0.0340386	0.7684	0.766563	FALSE	FALSE	FALSE	ieu-b-5124	10	93061851	0.0797361	NA	0.669459	HPC_noukb	Hypopharyngeal cancer (excl. UKB)	Hypopharyngeal cancer (excl. UKB) || ||	TRUE	igd	NA	NA	NA	NA	NA	NA	NA	10	93061851	0.0023	3.422e-09	484680	BMI_strict	TRUE	reported	HKLPXU	textfile	2	1	TRUE
	rs1477199	A	G	A	G	-0.0221	0.0633083	0.8426	0.856038	FALSE	FALSE	FALSE	ieu-b-5124	16	53712135	0.098379	NA	0.519891	HPC_noukb	Hypopharyngeal cancer (excl. UKB)	Hypopharyngeal cancer (excl. UKB) || ||	TRUE	igd	NA	NA	NA	NA	NA	NA	NA	16	53712135	0.0023	5.145e-21	806707	BMI_strict	TRUE	reported	HKLPXU	textfile	2	1	TRUE
	rs1492014	T	C	T	C	-0.0171	0.051919	0.5674	0.581733	FALSE	FALSE	FALSE	ieu-b-5124	3	94071481	0.0689675	NA	0.451568	HPC_noukb	Hypopharyngeal cancer (excl. UKB)	Hypopharyngeal cancer (excl. UKB) || ||	TRUE	igd	NA	NA	NA	NA	NA	NA	NA	3	94071481	0.0017	1.442e-23	718371	BMI_strict	TRUE	reported	HKLPXU	textfile	2	1	TRUE
	rs1492767	T	C	T	C	0.0095	-0.0755493	0.4681	0.498222	FALSE	FALSE	FALSE	ieu-b-5124	4	55221467	0.0683447	NA	0.26898	HPC_noukb	Hypopharyngeal cancer (excl. UKB)	Hypopharyngeal cancer (excl. UKB) || ||	TRUE	igd	NA	NA	NA	NA	NA	NA	NA	4	55221467	0.0016	3.546e-09	806046	BMI_strict	TRUE	reported	HKLPXU	textfile	2	1	TRUE
	rs1501673	A	G	A	G	0.0289	-0.0270785	0.1355	0.13349	FALSE	FALSE	FALSE	ieu-b-5124	5	87963600	0.0997419	NA	0.786017	HPC_noukb	Hypopharyngeal cancer (excl. UKB)	Hypopharyngeal cancer (excl. UKB) || ||	TRUE	igd	NA	NA	NA	NA	NA	NA	NA	5	87963600	0.0025	2.725e-31	718652	BMI_strict	TRUE	reported	HKLPXU	textfile	2	1	TRUE
	rs1522569	T	G	T	G	0.0141	0.00579331	0.8183	0.81906	FALSE	FALSE	FALSE	ieu-b-5124	4	171632637	0.0877327	NA	0.947351	HPC_noukb	Hypopharyngeal cancer (excl. UKB)	Hypopharyngeal cancer (excl. UKB) || ||	TRUE	igd	NA	NA	NA	NA	NA	NA	NA	4	171632637	0.0022	1.599e-10	718485	BMI_strict	TRUE	reported	HKLPXU	textfile	2	1	TRUE
	rs1559673	A	C	A	C	0.0359	0.173389	0.9688	0.976136	FALSE	FALSE	FALSE	ieu-b-5124	15	62156514	0.243124	NA	0.47574	HPC_noukb	Hypopharyngeal cancer (excl. UKB)	Hypopharyngeal cancer (excl. UKB) || ||	TRUE	igd	NA	NA	NA	NA	NA	NA	NA	15	62156514	0.0049	2.212e-13	791967	BMI_strict	TRUE	reported	HKLPXU	textfile	2	1	TRUE
	rs156201	C	G	C	G	0.0124	-0.0937694	0.7459	0.748808	FALSE	TRUE	FALSE	ieu-b-5124	6	104847441	0.0770042	NA	0.223331	HPC_noukb	Hypopharyngeal cancer (excl. UKB)	Hypopharyngeal cancer (excl. UKB) || ||	TRUE	igd	NA	NA	NA	NA	NA	NA	NA	6	104847441	0.0019	1.646e-10	718454	BMI_strict	TRUE	reported	HKLPXU	textfile	2	1	TRUE
	rs16851483	T	G	T	G	0.0352	-0.164392	0.0717	0.0636753	FALSE	FALSE	FALSE	ieu-b-5124	3	141275436	0.14522	NA	0.257626	HPC_noukb	Hypopharyngeal cancer (excl. UKB)	Hypopharyngeal cancer (excl. UKB) || ||	TRUE	igd	NA	NA	NA	NA	NA	NA	NA	3	141275436	0.0034	4.869e-25	718609	BMI_strict	TRUE	reported	HKLPXU	textfile	2	1	TRUE
	rs16906838	T	C	T	C	-0.0247	0.14272	0.0486	0.0489887	FALSE	FALSE	FALSE	ieu-b-5124	8	138213836	0.152422	NA	0.349094	HPC_noukb	Hypopharyngeal cancer (excl. UKB)	Hypopharyngeal cancer (excl. UKB) || ||	TRUE	igd	NA	NA	NA	NA	NA	NA	NA	8	138213836	0.004	4.305e-10	706788	BMI_strict	TRUE	reported	HKLPXU	textfile	2	1	TRUE
	rs17024393	T	C	T	C	-0.0644	-0.291482	0.9689	0.9681	FALSE	FALSE	FALSE	ieu-b-5124	1	110154688	0.181462	NA	0.108209	HPC_noukb	Hypopharyngeal cancer (excl. UKB)	Hypopharyngeal cancer (excl. UKB) || ||	TRUE	igd	NA	NA	NA	NA	NA	NA	NA	1	110154688	0.0049	7.105e-39	782554	BMI_strict	TRUE	reported	HKLPXU	textfile	2	1	TRUE
	rs17094222	T	C	T	C	-0.0173	0.0544324	0.7912	0.79192	FALSE	FALSE	FALSE	ieu-b-5124	10	102395440	0.0837309	NA	0.515636	HPC_noukb	Hypopharyngeal cancer (excl. UKB)	Hypopharyngeal cancer (excl. UKB) || ||	TRUE	igd	NA	NA	NA	NA	NA	NA	NA	10	102395440	0.002	4.043e-18	806450	BMI_strict	TRUE	reported	HKLPXU	textfile	2	1	TRUE
	rs17149254	T	C	T	C	0.0238	-0.130938	0.2051	0.172512	FALSE	FALSE	FALSE	ieu-b-5124	7	76691994	0.0967999	NA	0.176163	HPC_noukb	Hypopharyngeal cancer (excl. UKB)	Hypopharyngeal cancer (excl. UKB) || ||	TRUE	igd	TRUE	rs17149254	rs56076430	T	C	C	G	7	76634463	0.0023	2.993e-25	654047	BMI_strict	TRUE	reported	HKLPXU	textfile	2	1	TRUE
	rs17182027	A	G	A	G	-0.011	0.00474005	0.5647	0.556887	FALSE	FALSE	FALSE	ieu-b-5124	14	73348130	0.0673353	NA	0.94388	HPC_noukb	Hypopharyngeal cancer (excl. UKB)	Hypopharyngeal cancer (excl. UKB) || ||	TRUE	igd	NA	NA	NA	NA	NA	NA	NA	14	73348130	0.0017	1.46e-10	717831	BMI_strict	TRUE	reported	HKLPXU	textfile	2	1	TRUE
	rs17207196	T	C	T	C	-0.022	-0.133919	0.42	0.393899	FALSE	FALSE	FALSE	ieu-b-5124	7	75101065	0.073179	NA	0.0672465	HPC_noukb	Hypopharyngeal cancer (excl. UKB)	Hypopharyngeal cancer (excl. UKB) || ||	TRUE	igd	NA	NA	NA	NA	NA	NA	NA	7	75101065	0.0017	1.576e-36	694986	BMI_strict	TRUE	reported	HKLPXU	textfile	2	1	TRUE
	rs1721447	T	G	T	G	-0.01	-0.162416	0.5096	0.534311	FALSE	FALSE	FALSE	ieu-b-5124	7	109214139	0.0671989	NA	0.0156513	HPC_noukb	Hypopharyngeal cancer (excl. UKB)	Hypopharyngeal cancer (excl. UKB) || ||	TRUE	igd	NA	NA	NA	NA	NA	NA	NA	7	109214139	0.0017	3.793e-09	718656	BMI_strict	TRUE	reported	HKLPXU	textfile	2	1	TRUE
	rs17367750	T	C	T	C	-0.0122	-0.110723	0.3117	0.325122	FALSE	FALSE	FALSE	ieu-b-5124	4	140782542	0.0736428	NA	0.132705	HPC_noukb	Hypopharyngeal cancer (excl. UKB)	Hypopharyngeal cancer (excl. UKB) || ||	TRUE	igd	NA	NA	NA	NA	NA	NA	NA	4	140782542	0.0018	1.969e-11	718303	BMI_strict	TRUE	reported	HKLPXU	textfile	2	1	TRUE
	rs17405603	A	T	A	T	-0.0125	-0.0250325	0.7062	0.699524	FALSE	TRUE	FALSE	ieu-b-5124	5	144608340	0.0735752	NA	0.733682	HPC_noukb	Hypopharyngeal cancer (excl. UKB)	Hypopharyngeal cancer (excl. UKB) || ||	TRUE	igd	NA	NA	NA	NA	NA	NA	NA	5	144608340	0.0019	4.427e-11	716852	BMI_strict	TRUE	reported	HKLPXU	textfile	2	1	TRUE
	rs17405819	T	C	T	C	0.0211	-0.100433	0.6845	0.696963	FALSE	FALSE	FALSE	ieu-b-5124	8	76806584	0.0724021	NA	0.165393	HPC_noukb	Hypopharyngeal cancer (excl. UKB)	Hypopharyngeal cancer (excl. UKB) || ||	TRUE	igd	NA	NA	NA	NA	NA	NA	NA	8	76806584	0.0018	6.04e-33	806765	BMI_strict	TRUE	reported	HKLPXU	textfile	2	1	TRUE
	rs1750307	A	T	A	T	0.0129	-0.000352147	0.3655	0.366748	FALSE	TRUE	FALSE	ieu-b-5124	1	156488420	0.070129	NA	0.995994	HPC_noukb	Hypopharyngeal cancer (excl. UKB)	Hypopharyngeal cancer (excl. UKB) || ||	TRUE	igd	NA	NA	NA	NA	NA	NA	NA	1	156488420	0.0018	2.778e-13	718639	BMI_strict	TRUE	reported	HKLPXU	textfile	2	1	TRUE
	rs17636031	T	C	T	C	-0.0154	0.0616955	0.7244	0.719455	FALSE	FALSE	FALSE	ieu-b-5124	10	126594078	0.0761856	NA	0.418052	HPC_noukb	Hypopharyngeal cancer (excl. UKB)	Hypopharyngeal cancer (excl. UKB) || ||	TRUE	igd	NA	NA	NA	NA	NA	NA	NA	10	126594078	0.0018	3.87e-17	798189	BMI_strict	TRUE	reported	HKLPXU	textfile	2	1	TRUE
	rs17681451	A	G	A	G	-0.0225	-0.280335	0.0762	0.0804158	FALSE	FALSE	FALSE	ieu-b-5124	3	114399296	0.136263	NA	0.0396561	HPC_noukb	Hypopharyngeal cancer (excl. UKB)	Hypopharyngeal cancer (excl. UKB) || ||	TRUE	igd	NA	NA	NA	NA	NA	NA	NA	3	114399296	0.0031	7.37e-13	718679	BMI_strict	TRUE	reported	HKLPXU	textfile	2	1	TRUE
	rs17724992	A	G	A	G	0.0172	0.076742	0.7197	0.73814	FALSE	FALSE	FALSE	ieu-b-5124	19	18454825	0.0779535	NA	0.32489	HPC_noukb	Hypopharyngeal cancer (excl. UKB)	Hypopharyngeal cancer (excl. UKB) || ||	TRUE	igd	NA	NA	NA	NA	NA	NA	NA	19	18454825	0.0018	5.232e-21	804268	BMI_strict	TRUE	reported	HKLPXU	textfile	2	1	TRUE
	rs17783165	T	C	T	C	-0.0128	0.0111592	0.671	0.671639	FALSE	FALSE	FALSE	ieu-b-5124	18	63461638	0.0736585	NA	0.879582	HPC_noukb	Hypopharyngeal cancer (excl. UKB)	Hypopharyngeal cancer (excl. UKB) || ||	TRUE	igd	NA	NA	NA	NA	NA	NA	NA	18	63461638	0.0017	2.737e-13	801018	BMI_strict	TRUE	reported	HKLPXU	textfile	2	1	TRUE
	rs17806224	A	G	A	G	-0.026	0.0636445	0.1808	0.180347	FALSE	FALSE	FALSE	ieu-b-5124	20	51065854	0.0851574	NA	0.454837	HPC_noukb	Hypopharyngeal cancer (excl. UKB)	Hypopharyngeal cancer (excl. UKB) || ||	TRUE	igd	NA	NA	NA	NA	NA	NA	NA	20	51065854	0.0022	7.908e-32	718699	BMI_strict	TRUE	reported	HKLPXU	textfile	2	1	TRUE
	rs17814208	A	G	A	G	-0.0129	-0.0862883	0.7575	0.757478	FALSE	FALSE	FALSE	ieu-b-5124	2	144037998	0.0770164	NA	0.262549	HPC_noukb	Hypopharyngeal cancer (excl. UKB)	Hypopharyngeal cancer (excl. UKB) || ||	TRUE	igd	NA	NA	NA	NA	NA	NA	NA	2	144037998	0.002	7.239e-11	718642	BMI_strict	TRUE	reported	HKLPXU	textfile	2	1	TRUE
	rs1799923	A	G	A	G	-0.0224	0.0848902	0.1117	0.122511	FALSE	FALSE	FALSE	ieu-b-5124	3	42306294	0.104027	NA	0.414478	HPC_noukb	Hypopharyngeal cancer (excl. UKB)	Hypopharyngeal cancer (excl. UKB) || ||	TRUE	igd	NA	NA	NA	NA	NA	NA	NA	3	42306294	0.0026	1.124e-17	718667	BMI_strict	TRUE	reported	HKLPXU	textfile	2	1	TRUE
	rs1808629	A	G	A	G	-0.0202	-0.0865301	0.674	0.679854	FALSE	FALSE	FALSE	ieu-b-5124	8	73435964	0.0730798	NA	0.236394	HPC_noukb	Hypopharyngeal cancer (excl. UKB)	Hypopharyngeal cancer (excl. UKB) || ||	TRUE	igd	NA	NA	NA	NA	NA	NA	NA	8	73435964	0.002	2.191e-23	484680	BMI_strict	TRUE	reported	HKLPXU	textfile	2	1	TRUE
	rs185350	T	C	T	C	0.0137	-0.0150302	0.4902	0.504531	FALSE	FALSE	FALSE	ieu-b-5124	19	34306816	0.0672983	NA	0.823274	HPC_noukb	Hypopharyngeal cancer (excl. UKB)	Hypopharyngeal cancer (excl. UKB) || ||	TRUE	igd	NA	NA	NA	NA	NA	NA	NA	19	34306816	0.0016	9.104e-17	805076	BMI_strict	TRUE	reported	HKLPXU	textfile	2	1	TRUE
	rs1860561	A	G	A	G	0.0159	-0.0412705	0.2087	0.227815	FALSE	FALSE	FALSE	ieu-b-5124	12	110783241	0.0820316	NA	0.614889	HPC_noukb	Hypopharyngeal cancer (excl. UKB)	Hypopharyngeal cancer (excl. UKB) || ||	TRUE	igd	NA	NA	NA	NA	NA	NA	NA	12	110783241	0.0019	1.706e-16	806805	BMI_strict	TRUE	reported	HKLPXU	textfile	2	1	TRUE
	rs1877875	T	C	T	C	-0.0109	-0.0654269	0.4341	0.436919	FALSE	FALSE	FALSE	ieu-b-5124	9	120664469	0.0678114	NA	0.334627	HPC_noukb	Hypopharyngeal cancer (excl. UKB)	Hypopharyngeal cancer (excl. UKB) || ||	TRUE	igd	NA	NA	NA	NA	NA	NA	NA	9	120664469	0.0017	2.505e-10	718589	BMI_strict	TRUE	reported	HKLPXU	textfile	2	1	TRUE
	rs1884389	T	C	T	C	-0.0108	0.0438256	0.4386	0.439622	FALSE	FALSE	FALSE	ieu-b-5124	20	1410582	0.068044	NA	0.519524	HPC_noukb	Hypopharyngeal cancer (excl. UKB)	Hypopharyngeal cancer (excl. UKB) || ||	TRUE	igd	NA	NA	NA	NA	NA	NA	NA	20	1410582	0.0017	3.724e-10	718491	BMI_strict	TRUE	reported	HKLPXU	textfile	2	1	TRUE
	rs1884897	A	G	A	G	-0.0184	0.0368425	0.3747	0.373939	FALSE	FALSE	FALSE	ieu-b-5124	20	6614691	0.0695802	NA	0.596461	HPC_noukb	Hypopharyngeal cancer (excl. UKB)	Hypopharyngeal cancer (excl. UKB) || ||	TRUE	igd	TRUE	rs1884897	rs1321432	A	G	A	C	20	6612832	0.0017	2.701e-28	806711	BMI_strict	TRUE	reported	HKLPXU	textfile	2	1	TRUE
	rs1927790	T	C	T	C	-0.014	-0.0735727	0.606	0.584735	FALSE	FALSE	FALSE	ieu-b-5124	13	96922191	0.0684078	NA	0.28215	HPC_noukb	Hypopharyngeal cancer (excl. UKB)	Hypopharyngeal cancer (excl. UKB) || ||	TRUE	igd	NA	NA	NA	NA	NA	NA	NA	13	96922191	0.0016	1.571e-17	806731	BMI_strict	TRUE	reported	HKLPXU	textfile	2	1	TRUE
	rs1928295	T	C	T	C	0.0134	0.0797037	0.5712	0.563531	FALSE	FALSE	FALSE	ieu-b-5124	9	120378483	0.0679219	NA	0.240611	HPC_noukb	Hypopharyngeal cancer (excl. UKB)	Hypopharyngeal cancer (excl. UKB) || ||	TRUE	igd	NA	NA	NA	NA	NA	NA	NA	9	120378483	0.0016	2.225e-16	806659	BMI_strict	TRUE	reported	HKLPXU	textfile	2	1	TRUE
	rs1941696	A	G	A	G	0.0112	0.0487484	0.5174	0.516932	FALSE	FALSE	FALSE	ieu-b-5124	18	31252129	0.0675176	NA	0.470288	HPC_noukb	Hypopharyngeal cancer (excl. UKB)	Hypopharyngeal cancer (excl. UKB) || ||	TRUE	igd	NA	NA	NA	NA	NA	NA	NA	18	31252129	0.0017	4.741e-11	718672	BMI_strict	TRUE	reported	HKLPXU	textfile	2	1	TRUE
	rs1948080	T	G	T	G	0.0136	0.0210126	0.6303	0.625241	FALSE	FALSE	FALSE	ieu-b-5124	9	11852043	0.069274	NA	0.761642	HPC_noukb	Hypopharyngeal cancer (excl. UKB)	Hypopharyngeal cancer (excl. UKB) || ||	TRUE	igd	NA	NA	NA	NA	NA	NA	NA	9	11852043	0.0018	1.134e-14	718672	BMI_strict	TRUE	reported	HKLPXU	textfile	2	1	TRUE
	rs194809	A	G	A	G	0.0126	-0.134488	0.1871	0.196616	FALSE	FALSE	FALSE	ieu-b-5124	16	23804956	0.0888915	NA	0.130295	HPC_noukb	Hypopharyngeal cancer (excl. UKB)	Hypopharyngeal cancer (excl. UKB) || ||	TRUE	igd	NA	NA	NA	NA	NA	NA	NA	16	23804956	0.0022	4.861e-09	718688	BMI_strict	TRUE	reported	HKLPXU	textfile	2	1	TRUE
	rs1951455	T	C	T	C	-0.0148	-0.0339251	0.2813	0.247723	FALSE	FALSE	FALSE	ieu-b-5124	14	91515754	0.0788715	NA	0.6671	HPC_noukb	Hypopharyngeal cancer (excl. UKB)	Hypopharyngeal cancer (excl. UKB) || ||	TRUE	igd	TRUE	rs1951455	rs1296091	T	C	T	C	14	91512339	0.0019	6.048e-15	718607	BMI_strict	TRUE	reported	HKLPXU	textfile	2	1	TRUE
	rs1958898	C	G	C	G	-0.0146	-0.0102326	0.2098	0.2123	FALSE	TRUE	FALSE	ieu-b-5124	14	40886886	0.0819234	NA	0.900599	HPC_noukb	Hypopharyngeal cancer (excl. UKB)	Hypopharyngeal cancer (excl. UKB) || ||	TRUE	igd	NA	NA	NA	NA	NA	NA	NA	14	40886886	0.0021	4.225e-12	718191	BMI_strict	TRUE	reported	HKLPXU	textfile	2	1	TRUE
	rs1965529	A	G	A	G	0.0161	-0.0942793	0.773	0.778793	FALSE	FALSE	FALSE	ieu-b-5124	7	77829965	0.0795461	NA	0.235932	HPC_noukb	Hypopharyngeal cancer (excl. UKB)	Hypopharyngeal cancer (excl. UKB) || ||	TRUE	igd	TRUE	rs1965529	rs7792703	G	A	A	C	7	77825707	0.0022	7.659e-14	663213	BMI_strict	TRUE	reported	HKLPXU	textfile	2	1	TRUE
	rs197374	T	C	T	C	0.0141	-0.0474856	0.4027	0.392462	FALSE	FALSE	FALSE	ieu-b-5124	1	112289983	0.0695653	NA	0.494857	HPC_noukb	Hypopharyngeal cancer (excl. UKB)	Hypopharyngeal cancer (excl. UKB) || ||	TRUE	igd	NA	NA	NA	NA	NA	NA	NA	1	112289983	0.0017	3.155e-16	718653	BMI_strict	TRUE	reported	HKLPXU	textfile	2	1	TRUE
	rs1999433	T	C	T	C	-0.0107	-0.0668375	0.4403	0.435579	FALSE	FALSE	FALSE	ieu-b-5124	9	81371441	0.0696739	NA	0.337413	HPC_noukb	Hypopharyngeal cancer (excl. UKB)	Hypopharyngeal cancer (excl. UKB) || ||	TRUE	igd	NA	NA	NA	NA	NA	NA	NA	9	81371441	0.0017	2.899e-10	718517	BMI_strict	TRUE	reported	HKLPXU	textfile	2	1	TRUE
	rs2007518	A	G	A	G	-0.013	0.0888549	0.5618	0.566557	FALSE	FALSE	FALSE	ieu-b-5124	11	132639606	0.0691933	NA	0.199088	HPC_noukb	Hypopharyngeal cancer (excl. UKB)	Hypopharyngeal cancer (excl. UKB) || ||	TRUE	igd	NA	NA	NA	NA	NA	NA	NA	11	132639606	0.0017	1.964e-14	718682	BMI_strict	TRUE	reported	HKLPXU	textfile	2	1	TRUE
	rs2047648	A	T	A	T	-0.0133	0.127884	0.7465	0.747114	FALSE	TRUE	FALSE	ieu-b-5124	3	157044173	0.0796895	NA	0.108542	HPC_noukb	Hypopharyngeal cancer (excl. UKB)	Hypopharyngeal cancer (excl. UKB) || ||	TRUE	igd	TRUE	rs2047648	rs10936081	T	A	A	G	3	157033438	0.002	7.947e-12	718280	BMI_strict	TRUE	reported	HKLPXU	textfile	2	1	TRUE
	rs2051559	T	C	T	C	-0.0167	-0.123383	0.8588	0.863041	FALSE	FALSE	FALSE	ieu-b-5124	4	3298800	0.0947963	NA	0.193068	HPC_noukb	Hypopharyngeal cancer (excl. UKB)	Hypopharyngeal cancer (excl. UKB) || ||	TRUE	igd	NA	NA	NA	NA	NA	NA	NA	4	3298800	0.0025	3.775e-11	718374	BMI_strict	TRUE	reported	HKLPXU	textfile	2	1	TRUE
	rs2053682	A	C	A	C	0.017	-0.0139867	0.6784	0.673211	FALSE	FALSE	FALSE	ieu-b-5124	5	170599327	0.0719829	NA	0.845937	HPC_noukb	Hypopharyngeal cancer (excl. UKB)	Hypopharyngeal cancer (excl. UKB) || ||	TRUE	igd	NA	NA	NA	NA	NA	NA	NA	5	170599327	0.0018	2.591e-20	717007	BMI_strict	TRUE	reported	HKLPXU	textfile	2	1	TRUE
	rs2058527	T	G	T	G	-0.0115	0.0291786	0.2715	0.261085	FALSE	FALSE	FALSE	ieu-b-5124	16	6704749	0.0757355	NA	0.700039	HPC_noukb	Hypopharyngeal cancer (excl. UKB)	Hypopharyngeal cancer (excl. UKB) || ||	TRUE	igd	NA	NA	NA	NA	NA	NA	NA	16	6704749	0.0019	1.795e-09	718465	BMI_strict	TRUE	reported	HKLPXU	textfile	2	1	TRUE
	rs2065418	T	G	T	G	0.0139	0.0689193	0.646	0.63861	FALSE	FALSE	FALSE	ieu-b-5124	11	30422068	0.0704075	NA	0.327648	HPC_noukb	Hypopharyngeal cancer (excl. UKB)	Hypopharyngeal cancer (excl. UKB) || ||	TRUE	igd	NA	NA	NA	NA	NA	NA	NA	11	30422068	0.0018	6.073e-15	718408	BMI_strict	TRUE	reported	HKLPXU	textfile	2	1	TRUE
	rs2066295	A	G	A	G	0.0142	0.0917958	0.7577	0.762573	FALSE	FALSE	FALSE	ieu-b-5124	6	26168903	0.081332	NA	0.259044	HPC_noukb	Hypopharyngeal cancer (excl. UKB)	Hypopharyngeal cancer (excl. UKB) || ||	TRUE	igd	NA	NA	NA	NA	NA	NA	NA	6	26168903	0.002	2.285e-12	718598	BMI_strict	TRUE	reported	HKLPXU	textfile	2	1	TRUE
	rs2074314	T	C	T	C	0.0105	0.0572305	0.6356	0.637687	FALSE	FALSE	FALSE	ieu-b-5124	11	17411821	0.0699954	NA	0.413567	HPC_noukb	Hypopharyngeal cancer (excl. UKB)	Hypopharyngeal cancer (excl. UKB) || ||	TRUE	igd	NA	NA	NA	NA	NA	NA	NA	11	17411821	0.0017	1.369e-09	747074	BMI_strict	TRUE	reported	HKLPXU	textfile	2	1	TRUE
	rs2112347	T	G	T	G	0.0276	-0.00509706	0.6298	0.635288	FALSE	FALSE	FALSE	ieu-b-5124	5	75015242	0.0711126	NA	0.94286	HPC_noukb	Hypopharyngeal cancer (excl. UKB)	Hypopharyngeal cancer (excl. UKB) || ||	TRUE	igd	NA	NA	NA	NA	NA	NA	NA	5	75015242	0.0017	1.173e-61	806699	BMI_strict	TRUE	reported	HKLPXU	textfile	2	1	TRUE
	rs2134858	T	C	T	C	-0.0117	-0.0855368	0.5119	0.522322	FALSE	FALSE	FALSE	ieu-b-5124	9	73837155	0.0669736	NA	0.201542	HPC_noukb	Hypopharyngeal cancer (excl. UKB)	Hypopharyngeal cancer (excl. UKB) || ||	TRUE	igd	NA	NA	NA	NA	NA	NA	NA	9	73837155	0.0017	5.869e-12	718696	BMI_strict	TRUE	reported	HKLPXU	textfile	2	1	TRUE
	rs213518	T	C	T	C	-0.0153	-0.0995276	0.8498	0.858795	FALSE	FALSE	FALSE	ieu-b-5124	7	26941065	0.0942768	NA	0.291107	HPC_noukb	Hypopharyngeal cancer (excl. UKB)	Hypopharyngeal cancer (excl. UKB) || ||	TRUE	igd	NA	NA	NA	NA	NA	NA	NA	7	26941065	0.0024	2.492e-10	718433	BMI_strict	TRUE	reported	HKLPXU	textfile	2	1	TRUE
	rs214249	T	G	T	G	0.0138	0.0338779	0.6071	0.611264	FALSE	FALSE	FALSE	ieu-b-5124	16	348687	0.0691206	NA	0.624044	HPC_noukb	Hypopharyngeal cancer (excl. UKB)	Hypopharyngeal cancer (excl. UKB) || ||	TRUE	igd	NA	NA	NA	NA	NA	NA	NA	16	348687	0.0017	2.715e-15	718521	BMI_strict	TRUE	reported	HKLPXU	textfile	2	1	TRUE
	rs215669	A	G	A	G	-0.0149	-0.0738132	0.6024	0.613242	FALSE	FALSE	FALSE	ieu-b-5124	7	32378979	0.0698541	NA	0.290659	HPC_noukb	Hypopharyngeal cancer (excl. UKB)	Hypopharyngeal cancer (excl. UKB) || ||	TRUE	igd	NA	NA	NA	NA	NA	NA	NA	7	32378979	0.0017	8.938e-18	718120	BMI_strict	TRUE	reported	HKLPXU	textfile	2	1	TRUE
	rs217669	T	C	T	C	-0.0172	0.0932609	0.7224	0.735122	FALSE	FALSE	FALSE	ieu-b-5124	14	62360075	0.0785322	NA	0.235011	HPC_noukb	Hypopharyngeal cancer (excl. UKB)	Hypopharyngeal cancer (excl. UKB) || ||	TRUE	igd	NA	NA	NA	NA	NA	NA	NA	14	62360075	0.0021	6.271e-16	484680	BMI_strict	TRUE	reported	HKLPXU	textfile	2	1	TRUE
	rs2192158	A	G	A	G	0.0137	0.0757815	0.4492	0.453371	FALSE	FALSE	FALSE	ieu-b-5124	4	55505911	0.0682892	NA	0.267122	HPC_noukb	Hypopharyngeal cancer (excl. UKB)	Hypopharyngeal cancer (excl. UKB) || ||	TRUE	igd	TRUE	rs2192158	rs12499367	A	G	C	T	4	55505360	0.0017	7.417e-16	718510	BMI_strict	TRUE	reported	HKLPXU	textfile	2	1	TRUE
	rs2196618	A	G	A	G	-0.0137	0.0959226	0.2634	0.27028	FALSE	FALSE	FALSE	ieu-b-5124	8	85089437	0.0769475	NA	0.212545	HPC_noukb	Hypopharyngeal cancer (excl. UKB)	Hypopharyngeal cancer (excl. UKB) || ||	TRUE	igd	NA	NA	NA	NA	NA	NA	NA	8	85089437	0.0019	1.492e-12	718304	BMI_strict	TRUE	reported	HKLPXU	textfile	2	1	TRUE
	rs2206277	T	C	T	C	0.0408	0.0910369	0.1557	0.188638	FALSE	FALSE	FALSE	ieu-b-5124	6	50798526	0.0840246	NA	0.278606	HPC_noukb	Hypopharyngeal cancer (excl. UKB)	Hypopharyngeal cancer (excl. UKB) || ||	TRUE	igd	NA	NA	NA	NA	NA	NA	NA	6	50798526	0.0021	1.822e-83	806768	BMI_strict	TRUE	reported	HKLPXU	textfile	2	1	TRUE
	rs2228213	A	G	A	G	-0.0144	0.00472643	0.3374	0.3525	FALSE	FALSE	FALSE	ieu-b-5124	6	12124855	0.0697864	NA	0.946003	HPC_noukb	Hypopharyngeal cancer (excl. UKB)	Hypopharyngeal cancer (excl. UKB) || ||	TRUE	igd	NA	NA	NA	NA	NA	NA	NA	6	12124855	0.0017	5.498e-17	806782	BMI_strict	TRUE	reported	HKLPXU	textfile	2	1	TRUE
	rs2228552	T	G	T	G	0.0124	-0.0589541	0.5663	0.642205	FALSE	FALSE	FALSE	ieu-b-5124	1	32165495	0.0703125	NA	0.401774	HPC_noukb	Hypopharyngeal cancer (excl. UKB)	Hypopharyngeal cancer (excl. UKB) || ||	TRUE	igd	NA	NA	NA	NA	NA	NA	NA	1	32165495	0.0019	1.795e-11	588348	BMI_strict	TRUE	reported	HKLPXU	textfile	2	1	TRUE
	rs2241423	A	G	A	G	-0.0298	0.139198	0.2285	0.213228	FALSE	FALSE	FALSE	ieu-b-5124	15	68086838	0.0787855	NA	0.0772627	HPC_noukb	Hypopharyngeal cancer (excl. UKB)	Hypopharyngeal cancer (excl. UKB) || ||	TRUE	igd	NA	NA	NA	NA	NA	NA	NA	15	68086838	0.0019	3.602e-54	806797	BMI_strict	TRUE	reported	HKLPXU	textfile	2	1	TRUE
	rs2246012	T	C	T	C	-0.0161	0.161472	0.8512	0.83739	FALSE	FALSE	FALSE	ieu-b-5124	6	131898208	0.0958521	NA	0.0920662	HPC_noukb	Hypopharyngeal cancer (excl. UKB)	Hypopharyngeal cancer (excl. UKB) || ||	TRUE	igd	NA	NA	NA	NA	NA	NA	NA	6	131898208	0.0022	1.154e-13	806786	BMI_strict	TRUE	reported	HKLPXU	textfile	2	1	TRUE
	rs2257791	A	G	A	G	-0.0139	0.0169531	0.756	0.726815	FALSE	FALSE	FALSE	ieu-b-5124	10	118665788	0.0780272	NA	0.827997	HPC_noukb	Hypopharyngeal cancer (excl. UKB)	Hypopharyngeal cancer (excl. UKB) || ||	TRUE	igd	TRUE	rs2257791	rs2531689	G	A	G	A	10	118643670	0.002	1.631e-12	718675	BMI_strict	TRUE	reported	HKLPXU	textfile	2	1	TRUE
	rs225882	T	C	T	C	0.0113	-0.128533	0.7513	0.724837	FALSE	FALSE	FALSE	ieu-b-5124	14	30480123	0.0751859	NA	0.0873514	HPC_noukb	Hypopharyngeal cancer (excl. UKB)	Hypopharyngeal cancer (excl. UKB) || ||	TRUE	igd	NA	NA	NA	NA	NA	NA	NA	14	30480123	0.0018	8.564e-10	806807	BMI_strict	TRUE	reported	HKLPXU	textfile	2	1	TRUE
	rs2267958	A	G	A	G	-0.013	0.149145	0.5088	0.505604	FALSE	FALSE	FALSE	ieu-b-5124	9	131015279	0.0723797	NA	0.0393423	HPC_noukb	Hypopharyngeal cancer (excl. UKB)	Hypopharyngeal cancer (excl. UKB) || ||	TRUE	igd	NA	NA	NA	NA	NA	NA	NA	9	131015279	0.0018	2.013e-13	710694	BMI_strict	TRUE	reported	HKLPXU	textfile	2	1	TRUE
	rs2271046	A	T	A	T	-0.0115	-0.104784	0.6948	0.734454	FALSE	TRUE	FALSE	ieu-b-5124	4	52752812	0.0775457	NA	0.176613	HPC_noukb	Hypopharyngeal cancer (excl. UKB)	Hypopharyngeal cancer (excl. UKB) || ||	TRUE	igd	NA	NA	NA	NA	NA	NA	NA	4	52752812	0.0018	3.031e-10	718692	BMI_strict	TRUE	reported	HKLPXU	textfile	2	1	TRUE
	rs2273175	T	C	T	C	-0.0121	0.0404922	0.6791	0.674962	FALSE	FALSE	FALSE	ieu-b-5124	14	104160141	0.0727027	NA	0.577559	HPC_noukb	Hypopharyngeal cancer (excl. UKB)	Hypopharyngeal cancer (excl. UKB) || ||	TRUE	igd	NA	NA	NA	NA	NA	NA	NA	14	104160141	0.0018	3.69e-11	718683	BMI_strict	TRUE	reported	HKLPXU	textfile	2	1	TRUE
	rs2275003	A	G	A	G	0.0111	0.140833	0.5007	0.4759	FALSE	FALSE	FALSE	ieu-b-5124	9	34124860	0.0673488	NA	0.0365199	HPC_noukb	Hypopharyngeal cancer (excl. UKB)	Hypopharyngeal cancer (excl. UKB) || ||	TRUE	igd	NA	NA	NA	NA	NA	NA	NA	9	34124860	0.0016	9.438e-12	806747	BMI_strict	TRUE	reported	HKLPXU	textfile	2	1	TRUE
	rs2281819	A	T	A	T	-0.0154	0.0543603	0.2293	0.228823	FALSE	TRUE	FALSE	ieu-b-5124	6	33771673	0.0788289	NA	0.490447	HPC_noukb	Hypopharyngeal cancer (excl. UKB)	Hypopharyngeal cancer (excl. UKB) || ||	TRUE	igd	NA	NA	NA	NA	NA	NA	NA	6	33771673	0.002	2.088e-14	717097	BMI_strict	TRUE	reported	HKLPXU	textfile	2	1	TRUE
	rs2283006	A	G	A	G	0.0132	0.0157436	0.4881	0.489973	FALSE	FALSE	FALSE	ieu-b-5124	7	93085722	0.0693744	NA	0.820473	HPC_noukb	Hypopharyngeal cancer (excl. UKB)	Hypopharyngeal cancer (excl. UKB) || ||	TRUE	igd	NA	NA	NA	NA	NA	NA	NA	7	93085722	0.0017	8.055e-15	717331	BMI_strict	TRUE	reported	HKLPXU	textfile	2	1	TRUE
	rs2289379	T	C	T	C	-0.0137	-0.0607097	0.3917	0.395889	FALSE	FALSE	FALSE	ieu-b-5124	7	44804225	0.0696639	NA	0.3835	HPC_noukb	Hypopharyngeal cancer (excl. UKB)	Hypopharyngeal cancer (excl. UKB) || ||	TRUE	igd	NA	NA	NA	NA	NA	NA	NA	7	44804225	0.0018	7.019e-15	715836	BMI_strict	TRUE	reported	HKLPXU	textfile	2	1	TRUE
	rs2342892	T	G	T	G	0.0126	-0.0353307	0.4855	0.492019	FALSE	FALSE	FALSE	ieu-b-5124	16	24540806	0.0674875	NA	0.600616	HPC_noukb	Hypopharyngeal cancer (excl. UKB)	Hypopharyngeal cancer (excl. UKB) || ||	TRUE	igd	NA	NA	NA	NA	NA	NA	NA	16	24540806	0.0017	1.328e-13	714485	BMI_strict	TRUE	reported	HKLPXU	textfile	2	1	TRUE
	rs2357760	A	G	A	G	0.0143	-0.0807219	0.6735	0.671994	FALSE	FALSE	FALSE	ieu-b-5124	6	120213880	0.0704388	NA	0.251801	HPC_noukb	Hypopharyngeal cancer (excl. UKB)	Hypopharyngeal cancer (excl. UKB) || ||	TRUE	igd	NA	NA	NA	NA	NA	NA	NA	6	120213880	0.0017	2.106e-16	806795	BMI_strict	TRUE	reported	HKLPXU	textfile	2	1	TRUE
	rs2365389	T	C	T	C	-0.0168	0.0200049	0.3999	0.409984	FALSE	FALSE	FALSE	ieu-b-5124	3	61236462	0.0690453	NA	0.772017	HPC_noukb	Hypopharyngeal cancer (excl. UKB)	Hypopharyngeal cancer (excl. UKB) || ||	TRUE	igd	NA	NA	NA	NA	NA	NA	NA	3	61236462	0.0016	6.494e-25	801448	BMI_strict	TRUE	reported	HKLPXU	textfile	2	1	TRUE
	rs2396625	A	T	A	T	-0.0176	-0.0704298	0.4183	0.423214	FALSE	TRUE	TRUE	ieu-b-5124	7	113028634	0.0687856	NA	0.305881	HPC_noukb	Hypopharyngeal cancer (excl. UKB)	Hypopharyngeal cancer (excl. UKB) || ||	TRUE	igd	NA	NA	NA	NA	NA	NA	NA	7	113028634	0.0017	2.805e-24	718567	BMI_strict	TRUE	reported	HKLPXU	textfile	2	1	FALSE
	rs2400414	T	C	T	C	-0.0126	-0.111589	0.3461	0.361298	FALSE	FALSE	FALSE	ieu-b-5124	1	194965200	0.0706749	NA	0.114359	HPC_noukb	Hypopharyngeal cancer (excl. UKB)	Hypopharyngeal cancer (excl. UKB) || ||	TRUE	igd	NA	NA	NA	NA	NA	NA	NA	1	194965200	0.0018	5.521e-13	718698	BMI_strict	TRUE	reported	HKLPXU	textfile	2	1	TRUE
	rs2436728	A	G	A	G	0.0189	0.098735	0.4073	0.41443	FALSE	FALSE	FALSE	ieu-b-5124	6	40365601	0.0671934	NA	0.14172	HPC_noukb	Hypopharyngeal cancer (excl. UKB)	Hypopharyngeal cancer (excl. UKB) || ||	TRUE	igd	NA	NA	NA	NA	NA	NA	NA	6	40365601	0.0017	1.969e-29	718640	BMI_strict	TRUE	reported	HKLPXU	textfile	2	1	TRUE
	rs2439823	A	G	A	G	-0.0165	-0.0431107	0.4514	0.456758	FALSE	FALSE	FALSE	ieu-b-5124	10	99778226	0.0688862	NA	0.53143	HPC_noukb	Hypopharyngeal cancer (excl. UKB)	Hypopharyngeal cancer (excl. UKB) || ||	TRUE	igd	NA	NA	NA	NA	NA	NA	NA	10	99778226	0.0017	6.513e-22	718034	BMI_strict	TRUE	reported	HKLPXU	textfile	2	1	TRUE
	rs2466103	T	G	T	G	-0.0121	-0.0243332	0.6928	0.703302	FALSE	FALSE	FALSE	ieu-b-5124	8	32412304	0.0731297	NA	0.739329	HPC_noukb	Hypopharyngeal cancer (excl. UKB)	Hypopharyngeal cancer (excl. UKB) || ||	TRUE	igd	NA	NA	NA	NA	NA	NA	NA	8	32412304	0.0018	8.004e-12	802631	BMI_strict	TRUE	reported	HKLPXU	textfile	2	1	TRUE
	rs2470893	T	C	T	C	0.0107	-0.118451	0.3049	0.319313	FALSE	FALSE	FALSE	ieu-b-5124	15	75019449	0.0741356	NA	0.110096	HPC_noukb	Hypopharyngeal cancer (excl. UKB)	Hypopharyngeal cancer (excl. UKB) || ||	TRUE	igd	NA	NA	NA	NA	NA	NA	NA	15	75019449	0.0017	9.43e-10	803692	BMI_strict	TRUE	reported	HKLPXU	textfile	2	1	TRUE
	rs2503185	A	G	A	G	0.013	-0.0167631	0.5097	0.526979	FALSE	FALSE	FALSE	ieu-b-5124	1	66461401	0.0679939	NA	0.805266	HPC_noukb	Hypopharyngeal cancer (excl. UKB)	Hypopharyngeal cancer (excl. UKB) || ||	TRUE	igd	NA	NA	NA	NA	NA	NA	NA	1	66461401	0.0017	1.327e-14	717297	BMI_strict	TRUE	reported	HKLPXU	textfile	2	1	TRUE
	rs2513999	A	G	A	G	-0.0154	0.139272	0.1593	0.155109	FALSE	FALSE	FALSE	ieu-b-5124	11	103019633	0.090951	NA	0.1257	HPC_noukb	Hypopharyngeal cancer (excl. UKB)	Hypopharyngeal cancer (excl. UKB) || ||	TRUE	igd	NA	NA	NA	NA	NA	NA	NA	11	103019633	0.0026	3.066e-09	484680	BMI_strict	TRUE	reported	HKLPXU	textfile	2	1	TRUE
	rs2600226	T	C	T	C	-0.0116	0.00983554	0.6712	0.667832	FALSE	FALSE	FALSE	ieu-b-5124	3	12928762	0.0721654	NA	0.891591	HPC_noukb	Hypopharyngeal cancer (excl. UKB)	Hypopharyngeal cancer (excl. UKB) || ||	TRUE	igd	NA	NA	NA	NA	NA	NA	NA	3	12928762	0.0018	1.423e-10	718538	BMI_strict	TRUE	reported	HKLPXU	textfile	2	1	TRUE
	rs2605603	A	G	A	G	-0.0103	-0.00354285	0.4812	0.487749	FALSE	FALSE	FALSE	ieu-b-5124	11	93221105	0.0669659	NA	0.957807	HPC_noukb	Hypopharyngeal cancer (excl. UKB)	Hypopharyngeal cancer (excl. UKB) || ||	TRUE	igd	NA	NA	NA	NA	NA	NA	NA	11	93221105	0.0016	2.041e-10	806679	BMI_strict	TRUE	reported	HKLPXU	textfile	2	1	TRUE
	rs2622274	T	G	T	G	-0.0107	0.00684615	0.4553	0.437922	FALSE	FALSE	FALSE	ieu-b-5124	6	64240516	0.0685579	NA	0.920456	HPC_noukb	Hypopharyngeal cancer (excl. UKB)	Hypopharyngeal cancer (excl. UKB) || ||	TRUE	igd	NA	NA	NA	NA	NA	NA	NA	6	64240516	0.0017	3.23e-10	718675	BMI_strict	TRUE	reported	HKLPXU	textfile	2	1	TRUE
	rs264941	A	C	A	C	-0.0124	-0.0465847	0.4679	0.462586	FALSE	FALSE	FALSE	ieu-b-5124	2	104297420	0.0675909	NA	0.490688	HPC_noukb	Hypopharyngeal cancer (excl. UKB)	Hypopharyngeal cancer (excl. UKB) || ||	TRUE	igd	NA	NA	NA	NA	NA	NA	NA	2	104297420	0.0017	1.836e-13	718689	BMI_strict	TRUE	reported	HKLPXU	textfile	2	1	TRUE
	rs2715423	A	G	A	G	-0.0115	-0.0754522	0.2805	0.286024	FALSE	FALSE	FALSE	ieu-b-5124	15	99511873	0.0764904	NA	0.323923	HPC_noukb	Hypopharyngeal cancer (excl. UKB)	Hypopharyngeal cancer (excl. UKB) || ||	TRUE	igd	NA	NA	NA	NA	NA	NA	NA	15	99511873	0.0019	1.901e-09	706401	BMI_strict	TRUE	reported	HKLPXU	textfile	2	1	TRUE
	rs273512	T	C	T	C	0.0156	0.031011	0.409	0.411012	FALSE	FALSE	FALSE	ieu-b-5124	19	18224729	0.068096	NA	0.648821	HPC_noukb	Hypopharyngeal cancer (excl. UKB)	Hypopharyngeal cancer (excl. UKB) || ||	TRUE	igd	NA	NA	NA	NA	NA	NA	NA	19	18224729	0.0018	4.477e-19	718525	BMI_strict	TRUE	reported	HKLPXU	textfile	2	1	TRUE
	rs2744974	T	C	T	C	0.0261	0.00535952	0.3239	0.333607	FALSE	FALSE	FALSE	ieu-b-5124	6	34579431	0.0710122	NA	0.939838	HPC_noukb	Hypopharyngeal cancer (excl. UKB)	Hypopharyngeal cancer (excl. UKB) || ||	TRUE	igd	NA	NA	NA	NA	NA	NA	NA	6	34579431	0.0017	1.275e-51	804150	BMI_strict	TRUE	reported	HKLPXU	textfile	2	1	TRUE
	rs2777768	A	G	A	G	0.0119	0.0108329	0.7228	0.734812	FALSE	FALSE	FALSE	ieu-b-5124	9	84186734	0.0778117	NA	0.889277	HPC_noukb	Hypopharyngeal cancer (excl. UKB)	Hypopharyngeal cancer (excl. UKB) || ||	TRUE	igd	NA	NA	NA	NA	NA	NA	NA	9	84186734	0.0019	6.377e-10	718589	BMI_strict	TRUE	reported	HKLPXU	textfile	2	1	TRUE
	rs2820295	A	G	A	G	0.0235	0.0616832	0.3266	0.336412	FALSE	FALSE	FALSE	ieu-b-5124	1	201800868	0.0704836	NA	0.381496	HPC_noukb	Hypopharyngeal cancer (excl. UKB)	Hypopharyngeal cancer (excl. UKB) || ||	TRUE	igd	NA	NA	NA	NA	NA	NA	NA	1	201800868	0.0018	5.556e-39	718545	BMI_strict	TRUE	reported	HKLPXU	textfile	2	1	TRUE
	rs2832283	A	G	A	G	0.0115	-0.0550525	0.2254	0.220708	FALSE	FALSE	FALSE	ieu-b-5124	21	30690558	0.0818772	NA	0.501343	HPC_noukb	Hypopharyngeal cancer (excl. UKB)	Hypopharyngeal cancer (excl. UKB) || ||	TRUE	igd	NA	NA	NA	NA	NA	NA	NA	21	30690558	0.002	4.718e-09	806772	BMI_strict	TRUE	reported	HKLPXU	textfile	2	1	TRUE
	rs28350	A	G	A	G	0.0172	0.107877	0.1717	0.799387	FALSE	FALSE	FALSE	ieu-b-5124	3	42425059	0.0902959	NA	0.232204	HPC_noukb	Hypopharyngeal cancer (excl. UKB)	Hypopharyngeal cancer (excl. UKB) || ||	TRUE	igd	TRUE	rs28350	rs33494	A	G	C	G	3	42418446	0.0022	1.074e-14	717783	BMI_strict	TRUE	reported	HKLPXU	textfile	2	1	TRUE
	rs28489620	A	G	A	G	-0.0151	0.104815	0.2818	0.297076	FALSE	FALSE	FALSE	ieu-b-5124	22	41804716	0.0725235	NA	0.148385	HPC_noukb	Hypopharyngeal cancer (excl. UKB)	Hypopharyngeal cancer (excl. UKB) || ||	TRUE	igd	NA	NA	NA	NA	NA	NA	NA	22	41804716	0.0021	1.423e-12	484680	BMI_strict	TRUE	reported	HKLPXU	textfile	2	1	TRUE
	rs2861089	A	T	A	T	0.0105	0.028685	0.3806	0.375087	FALSE	TRUE	FALSE	ieu-b-5124	5	164557954	0.0698486	NA	0.681312	HPC_noukb	Hypopharyngeal cancer (excl. UKB)	Hypopharyngeal cancer (excl. UKB) || ||	TRUE	igd	NA	NA	NA	NA	NA	NA	NA	5	164557954	0.0017	1.549e-09	718566	BMI_strict	TRUE	reported	HKLPXU	textfile	2	1	TRUE
	rs2861685	T	C	T	C	0.0165	-0.0103888	0.5864	0.594419	FALSE	FALSE	FALSE	ieu-b-5124	2	67837553	0.0683103	NA	0.879121	HPC_noukb	Hypopharyngeal cancer (excl. UKB)	Hypopharyngeal cancer (excl. UKB) || ||	TRUE	igd	NA	NA	NA	NA	NA	NA	NA	2	67837553	0.0019	7.823e-18	484680	BMI_strict	TRUE	reported	HKLPXU	textfile	2	1	TRUE
	rs2862996	T	G	T	G	-0.0216	-0.0837693	0.7012	0.695822	FALSE	FALSE	FALSE	ieu-b-5124	11	43653833	0.0718811	NA	0.243862	HPC_noukb	Hypopharyngeal cancer (excl. UKB)	Hypopharyngeal cancer (excl. UKB) || ||	TRUE	igd	NA	NA	NA	NA	NA	NA	NA	11	43653833	0.0017	3.604e-35	806675	BMI_strict	TRUE	reported	HKLPXU	textfile	2	1	TRUE
	rs2875762	C	G	C	G	0.0129	0.0248886	0.252	0.237789	FALSE	TRUE	FALSE	ieu-b-5124	6	124925032	0.0794848	NA	0.754185	HPC_noukb	Hypopharyngeal cancer (excl. UKB)	Hypopharyngeal cancer (excl. UKB) || ||	TRUE	igd	NA	NA	NA	NA	NA	NA	NA	6	124925032	0.002	1.066e-10	717481	BMI_strict	TRUE	reported	HKLPXU	textfile	2	1	TRUE
	rs2907948	A	G	A	G	-0.0145	-0.0550917	0.244	0.235259	FALSE	FALSE	FALSE	ieu-b-5124	7	150638484	0.0798527	NA	0.490246	HPC_noukb	Hypopharyngeal cancer (excl. UKB)	Hypopharyngeal cancer (excl. UKB) || ||	TRUE	igd	NA	NA	NA	NA	NA	NA	NA	7	150638484	0.0019	1.945e-14	806659	BMI_strict	TRUE	reported	HKLPXU	textfile	2	1	TRUE
	rs2910026	T	C	T	C	-0.0132	0.0629965	0.7222	0.720459	FALSE	FALSE	FALSE	ieu-b-5124	5	152529936	0.0757547	NA	0.405643	HPC_noukb	Hypopharyngeal cancer (excl. UKB)	Hypopharyngeal cancer (excl. UKB) || ||	TRUE	igd	NA	NA	NA	NA	NA	NA	NA	5	152529936	0.0021	5.688e-10	484680	BMI_strict	TRUE	reported	HKLPXU	textfile	2	1	TRUE
	rs2962334	T	G	T	G	0.0396	0.238912	0.0272	0.0231784	FALSE	FALSE	FALSE	ieu-b-5124	5	86879056	0.207396	NA	0.249337	HPC_noukb	Hypopharyngeal cancer (excl. UKB)	Hypopharyngeal cancer (excl. UKB) || ||	TRUE	igd	NA	NA	NA	NA	NA	NA	NA	5	86879056	0.0059	1.777e-11	715204	BMI_strict	TRUE	reported	HKLPXU	textfile	2	1	TRUE
	rs2984618	T	G	T	G	0.0165	0.0236845	0.4408	0.404949	FALSE	FALSE	FALSE	ieu-b-5124	1	47690438	0.0686365	NA	0.730041	HPC_noukb	Hypopharyngeal cancer (excl. UKB)	Hypopharyngeal cancer (excl. UKB) || ||	TRUE	igd	NA	NA	NA	NA	NA	NA	NA	1	47690438	0.0016	3.803e-24	806433	BMI_strict	TRUE	reported	HKLPXU	textfile	2	1	TRUE
	rs3101336	T	C	T	C	-0.0254	0.099279	0.3825	0.389562	FALSE	FALSE	FALSE	ieu-b-5124	1	72751185	0.0682635	NA	0.14585	HPC_noukb	Hypopharyngeal cancer (excl. UKB)	Hypopharyngeal cancer (excl. UKB) || ||	TRUE	igd	NA	NA	NA	NA	NA	NA	NA	1	72751185	0.0016	4.804e-54	801552	BMI_strict	TRUE	reported	HKLPXU	textfile	2	1	TRUE
	rs3115667	T	C	T	C	-0.0179	-0.0435644	0.2821	0.259312	FALSE	FALSE	FALSE	ieu-b-5124	6	31643399	0.0771426	NA	0.572261	HPC_noukb	Hypopharyngeal cancer (excl. UKB)	Hypopharyngeal cancer (excl. UKB) || ||	TRUE	igd	NA	NA	NA	NA	NA	NA	NA	6	31643399	0.0019	5.924e-21	717285	BMI_strict	TRUE	reported	HKLPXU	textfile	2	1	TRUE
	rs312750	A	G	A	G	0.0097	0.101531	0.4986	0.482392	FALSE	FALSE	FALSE	ieu-b-5124	17	68343539	0.0673552	NA	0.13171	HPC_noukb	Hypopharyngeal cancer (excl. UKB)	Hypopharyngeal cancer (excl. UKB) || ||	TRUE	igd	NA	NA	NA	NA	NA	NA	NA	17	68343539	0.0016	2.565e-09	806739	BMI_strict	TRUE	reported	HKLPXU	textfile	2	1	TRUE
	rs321237	A	G	A	G	0.0126	-0.0567346	0.7498	0.741602	FALSE	FALSE	FALSE	ieu-b-5124	1	96478125	0.076455	NA	0.458048	HPC_noukb	Hypopharyngeal cancer (excl. UKB)	Hypopharyngeal cancer (excl. UKB) || ||	TRUE	igd	NA	NA	NA	NA	NA	NA	NA	1	96478125	0.002	1.488e-10	718362	BMI_strict	TRUE	reported	HKLPXU	textfile	2	1	TRUE
	rs326893	T	C	T	C	0.0121	-0.0168169	0.5812	0.608025	FALSE	FALSE	FALSE	ieu-b-5124	4	112691776	0.0697516	NA	0.80948	HPC_noukb	Hypopharyngeal cancer (excl. UKB)	Hypopharyngeal cancer (excl. UKB) || ||	TRUE	igd	NA	NA	NA	NA	NA	NA	NA	4	112691776	0.0017	1.893e-12	718672	BMI_strict	TRUE	reported	HKLPXU	textfile	2	1	TRUE
	rs337637	A	G	A	G	-0.0137	0.0499169	0.359	0.344147	FALSE	FALSE	FALSE	ieu-b-5124	4	38604470	0.0702837	NA	0.477568	HPC_noukb	Hypopharyngeal cancer (excl. UKB)	Hypopharyngeal cancer (excl. UKB) || ||	TRUE	igd	NA	NA	NA	NA	NA	NA	NA	4	38604470	0.0017	6.237e-16	806528	BMI_strict	TRUE	reported	HKLPXU	textfile	2	1	TRUE
	rs339991	A	G	A	G	-0.0125	-0.0286356	0.4201	0.432534	FALSE	FALSE	FALSE	ieu-b-5124	15	60913637	0.0689241	NA	0.677801	HPC_noukb	Hypopharyngeal cancer (excl. UKB)	Hypopharyngeal cancer (excl. UKB) || ||	TRUE	igd	NA	NA	NA	NA	NA	NA	NA	15	60913637	0.0017	3.514e-13	717095	BMI_strict	TRUE	reported	HKLPXU	textfile	2	1	TRUE
	rs34184235	T	C	T	C	-0.0115	0.00176548	0.4353	0.435737	FALSE	FALSE	FALSE	ieu-b-5124	3	86192846	0.0681686	NA	0.979338	HPC_noukb	Hypopharyngeal cancer (excl. UKB)	Hypopharyngeal cancer (excl. UKB) || ||	TRUE	igd	NA	NA	NA	NA	NA	NA	NA	3	86192846	0.0019	2.143e-09	484680	BMI_strict	TRUE	reported	HKLPXU	textfile	2	1	TRUE
	rs34234296	A	G	A	G	-0.0145	0.13597	0.3876	0.375624	FALSE	FALSE	FALSE	ieu-b-5124	2	175166636	0.069644	NA	0.0508956	HPC_noukb	Hypopharyngeal cancer (excl. UKB)	Hypopharyngeal cancer (excl. UKB) || ||	TRUE	igd	NA	NA	NA	NA	NA	NA	NA	2	175166636	0.002	2.011e-13	484680	BMI_strict	TRUE	reported	HKLPXU	textfile	2	1	TRUE
	rs34517439	A	C	A	C	0.0391	-0.0344056	0.1168	0.120302	FALSE	FALSE	FALSE	ieu-b-5124	1	78450517	0.105541	NA	0.744429	HPC_noukb	Hypopharyngeal cancer (excl. UKB)	Hypopharyngeal cancer (excl. UKB) || ||	TRUE	igd	NA	NA	NA	NA	NA	NA	NA	1	78450517	0.003	3.403e-39	484680	BMI_strict	TRUE	reported	HKLPXU	textfile	2	1	TRUE
	rs34811474	A	G	A	G	-0.0293	0.0334766	0.2224	0.223496	FALSE	FALSE	FALSE	ieu-b-5124	4	25408838	0.0854449	NA	0.695212	HPC_noukb	Hypopharyngeal cancer (excl. UKB)	Hypopharyngeal cancer (excl. UKB) || ||	TRUE	igd	NA	NA	NA	NA	NA	NA	NA	4	25408838	0.0023	8.504e-38	484680	BMI_strict	TRUE	reported	HKLPXU	textfile	2	1	TRUE
	rs349088	A	C	A	C	-0.013	0.0423107	0.4777	0.500053	FALSE	FALSE	FALSE	ieu-b-5124	11	84814393	0.0676104	NA	0.531445	HPC_noukb	Hypopharyngeal cancer (excl. UKB)	Hypopharyngeal cancer (excl. UKB) || ||	TRUE	igd	NA	NA	NA	NA	NA	NA	NA	11	84814393	0.0017	3.501e-14	718429	BMI_strict	TRUE	reported	HKLPXU	textfile	2	1	TRUE
	rs35483388	T	C	T	C	0.0125	0.0618738	0.3794	0.384475	FALSE	FALSE	FALSE	ieu-b-5124	11	122545146	0.0692341	NA	0.371488	HPC_noukb	Hypopharyngeal cancer (excl. UKB)	Hypopharyngeal cancer (excl. UKB) || ||	TRUE	igd	NA	NA	NA	NA	NA	NA	NA	11	122545146	0.002	2.607e-10	484680	BMI_strict	TRUE	reported	HKLPXU	textfile	2	1	TRUE
	rs355777	C	G	C	G	0.0151	-0.0491982	0.3984	0.409153	FALSE	TRUE	FALSE	ieu-b-5124	3	154034950	0.0688563	NA	0.474915	HPC_noukb	Hypopharyngeal cancer (excl. UKB)	Hypopharyngeal cancer (excl. UKB) || ||	TRUE	igd	NA	NA	NA	NA	NA	NA	NA	3	154034950	0.0017	2.129e-18	718342	BMI_strict	TRUE	reported	HKLPXU	textfile	2	1	TRUE
	rs35867081	A	G	A	G	0.015	0.159182	0.4871	0.494009	FALSE	FALSE	FALSE	ieu-b-5124	17	79047278	0.0686111	NA	0.0203376	HPC_noukb	Hypopharyngeal cancer (excl. UKB)	Hypopharyngeal cancer (excl. UKB) || ||	TRUE	igd	NA	NA	NA	NA	NA	NA	NA	17	79047278	0.0019	6.648e-15	484680	BMI_strict	TRUE	reported	HKLPXU	textfile	2	1	TRUE
	rs35949039	T	G	T	G	-0.0215	-0.122607	0.1056	0.108319	FALSE	FALSE	FALSE	ieu-b-5124	16	70572605	0.115661	NA	0.28912	HPC_noukb	Hypopharyngeal cancer (excl. UKB)	Hypopharyngeal cancer (excl. UKB) || ||	TRUE	igd	NA	NA	NA	NA	NA	NA	NA	16	70572605	0.0031	6.297e-12	484680	BMI_strict	TRUE	reported	HKLPXU	textfile	2	1	TRUE
	rs3796432	T	G	T	G	-0.0113	-0.0137734	0.3672	0.362871	FALSE	FALSE	FALSE	ieu-b-5124	4	96030402	0.0693545	NA	0.84258	HPC_noukb	Hypopharyngeal cancer (excl. UKB)	Hypopharyngeal cancer (excl. UKB) || ||	TRUE	igd	NA	NA	NA	NA	NA	NA	NA	4	96030402	0.0018	2.214e-10	718567	BMI_strict	TRUE	reported	HKLPXU	textfile	2	1	TRUE
	rs3806114	A	G	A	G	-0.012	0.00480941	0.6916	0.673243	FALSE	FALSE	FALSE	ieu-b-5124	6	20482335	0.0730245	NA	0.947489	HPC_noukb	Hypopharyngeal cancer (excl. UKB)	Hypopharyngeal cancer (excl. UKB) || ||	TRUE	igd	NA	NA	NA	NA	NA	NA	NA	6	20482335	0.0018	1.459e-11	804965	BMI_strict	TRUE	reported	HKLPXU	textfile	2	1	TRUE
	rs3808477	T	C	T	C	-0.0182	0.0209602	0.274	0.274858	FALSE	FALSE	FALSE	ieu-b-5124	8	116670347	0.0751088	NA	0.780195	HPC_noukb	Hypopharyngeal cancer (excl. UKB)	Hypopharyngeal cancer (excl. UKB) || ||	TRUE	igd	NA	NA	NA	NA	NA	NA	NA	8	116670347	0.0019	8.726e-22	718439	BMI_strict	TRUE	reported	HKLPXU	textfile	2	1	TRUE
	rs3814883	T	C	T	C	0.0227	-0.0271757	0.4795	0.45531	FALSE	FALSE	FALSE	ieu-b-5124	16	29994922	0.0703567	NA	0.699307	HPC_noukb	Hypopharyngeal cancer (excl. UKB)	Hypopharyngeal cancer (excl. UKB) || ||	TRUE	igd	NA	NA	NA	NA	NA	NA	NA	16	29994922	0.0017	1.471e-40	717877	BMI_strict	TRUE	reported	HKLPXU	textfile	2	1	TRUE
	rs3825061	T	C	T	C	0.014	-0.013652	0.3863	0.385612	FALSE	FALSE	FALSE	ieu-b-5124	11	118944675	0.0699211	NA	0.845198	HPC_noukb	Hypopharyngeal cancer (excl. UKB)	Hypopharyngeal cancer (excl. UKB) || ||	TRUE	igd	NA	NA	NA	NA	NA	NA	NA	11	118944675	0.0017	6.149e-16	718354	BMI_strict	TRUE	reported	HKLPXU	textfile	2	1	TRUE
	rs3902951	T	G	T	G	-0.0134	0.0992533	0.7691	0.747813	FALSE	FALSE	FALSE	ieu-b-5124	14	69789755	0.0802335	NA	0.216066	HPC_noukb	Hypopharyngeal cancer (excl. UKB)	Hypopharyngeal cancer (excl. UKB) || ||	TRUE	igd	NA	NA	NA	NA	NA	NA	NA	14	69789755	0.0019	2.883e-12	794335	BMI_strict	TRUE	reported	HKLPXU	textfile	2	1	TRUE
	rs3923783	A	C	A	C	-0.0222	-0.0234395	0.1784	0.180706	FALSE	FALSE	FALSE	ieu-b-5124	17	1843189	0.0902755	NA	0.795138	HPC_noukb	Hypopharyngeal cancer (excl. UKB)	Hypopharyngeal cancer (excl. UKB) || ||	TRUE	igd	NA	NA	NA	NA	NA	NA	NA	17	1843189	0.0022	4.121e-23	714524	BMI_strict	TRUE	reported	HKLPXU	textfile	2	1	TRUE
	rs39654	A	G	A	G	-0.0163	0.0468981	0.4513	0.461376	FALSE	FALSE	FALSE	ieu-b-5124	3	173095123	0.0689442	NA	0.496357	HPC_noukb	Hypopharyngeal cancer (excl. UKB)	Hypopharyngeal cancer (excl. UKB) || ||	TRUE	igd	NA	NA	NA	NA	NA	NA	NA	3	173095123	0.0017	1.745e-21	717812	BMI_strict	TRUE	reported	HKLPXU	textfile	2	1	TRUE
	rs40067	A	G	A	G	-0.0252	0.0073626	0.1701	0.164274	FALSE	FALSE	FALSE	ieu-b-5124	5	107439012	0.0897333	NA	0.934607	HPC_noukb	Hypopharyngeal cancer (excl. UKB)	Hypopharyngeal cancer (excl. UKB) || ||	TRUE	igd	NA	NA	NA	NA	NA	NA	NA	5	107439012	0.0023	9.728e-29	714059	BMI_strict	TRUE	reported	HKLPXU	textfile	2	1	TRUE
	rs4017425	T	C	T	C	-0.0118	0.00460835	0.4676	0.466669	FALSE	FALSE	FALSE	ieu-b-5124	3	44028764	0.0669776	NA	0.945145	HPC_noukb	Hypopharyngeal cancer (excl. UKB)	Hypopharyngeal cancer (excl. UKB) || ||	TRUE	igd	NA	NA	NA	NA	NA	NA	NA	3	44028764	0.0017	2.911e-12	718438	BMI_strict	TRUE	reported	HKLPXU	textfile	2	1	TRUE
	rs4097319	T	G	T	G	0.0107	-0.0345049	0.5641	0.574943	FALSE	FALSE	FALSE	ieu-b-5124	10	33860515	0.0685093	NA	0.614504	HPC_noukb	Hypopharyngeal cancer (excl. UKB)	Hypopharyngeal cancer (excl. UKB) || ||	TRUE	igd	NA	NA	NA	NA	NA	NA	NA	10	33860515	0.0017	4.323e-10	718651	BMI_strict	TRUE	reported	HKLPXU	textfile	2	1	TRUE
	rs4148155	A	G	A	G	0.0192	0.0951804	0.8867	0.891319	FALSE	FALSE	FALSE	ieu-b-5124	4	89054667	0.110744	NA	0.390085	HPC_noukb	Hypopharyngeal cancer (excl. UKB)	Hypopharyngeal cancer (excl. UKB) || ||	TRUE	igd	NA	NA	NA	NA	NA	NA	NA	4	89054667	0.0026	1.339e-13	806326	BMI_strict	TRUE	reported	HKLPXU	textfile	2	1	TRUE
	rs4240673	T	C	T	C	0.0175	0.00916222	0.4545	0.451374	FALSE	FALSE	FALSE	ieu-b-5124	8	10787612	0.0681264	NA	0.893016	HPC_noukb	Hypopharyngeal cancer (excl. UKB)	Hypopharyngeal cancer (excl. UKB) || ||	TRUE	igd	NA	NA	NA	NA	NA	NA	NA	8	10787612	0.0016	1.584e-26	806735	BMI_strict	TRUE	reported	HKLPXU	textfile	2	1	TRUE
	rs4256980	C	G	C	G	-0.0187	-0.0298685	0.3305	0.35138	FALSE	TRUE	FALSE	ieu-b-5124	11	8673939	0.0706188	NA	0.672329	HPC_noukb	Hypopharyngeal cancer (excl. UKB)	Hypopharyngeal cancer (excl. UKB) || ||	TRUE	igd	NA	NA	NA	NA	NA	NA	NA	11	8673939	0.0017	8.633e-29	804708	BMI_strict	TRUE	reported	HKLPXU	textfile	2	1	TRUE
	rs427943	A	C	A	C	-0.0177	-0.00038471	0.4288	0.443678	FALSE	FALSE	FALSE	ieu-b-5124	21	46570896	0.067758	NA	0.99547	HPC_noukb	Hypopharyngeal cancer (excl. UKB)	Hypopharyngeal cancer (excl. UKB) || ||	TRUE	igd	NA	NA	NA	NA	NA	NA	NA	21	46570896	0.0017	3.603e-25	742360	BMI_strict	TRUE	reported	HKLPXU	textfile	2	1	TRUE
	rs4286488	A	G	A	G	0.0121	-0.0651756	0.7608	0.758139	FALSE	FALSE	FALSE	ieu-b-5124	4	94440026	0.0776994	NA	0.401572	HPC_noukb	Hypopharyngeal cancer (excl. UKB)	Hypopharyngeal cancer (excl. UKB) || ||	TRUE	igd	NA	NA	NA	NA	NA	NA	NA	4	94440026	0.002	1.704e-09	718676	BMI_strict	TRUE	reported	HKLPXU	textfile	2	1	TRUE
	rs429358	T	C	T	C	0.0257	0.0574803	0.8459	0.859094	FALSE	FALSE	FALSE	ieu-b-5124	19	45411941	0.0994562	NA	0.5633	HPC_noukb	Hypopharyngeal cancer (excl. UKB)	Hypopharyngeal cancer (excl. UKB) || ||	TRUE	igd	NA	NA	NA	NA	NA	NA	NA	19	45411941	0.0026	2.599e-22	484680	BMI_strict	TRUE	reported	HKLPXU	textfile	2	1	TRUE
	rs4303732	T	C	T	C	0.0169	0.117859	0.6137	0.605542	FALSE	FALSE	FALSE	ieu-b-5124	2	100830040	0.0701595	NA	0.0929822	HPC_noukb	Hypopharyngeal cancer (excl. UKB)	Hypopharyngeal cancer (excl. UKB) || ||	TRUE	igd	NA	NA	NA	NA	NA	NA	NA	2	100830040	0.0017	1.264e-22	718627	BMI_strict	TRUE	reported	HKLPXU	textfile	2	1	TRUE
	rs4307239	A	G	A	G	-0.0115	-0.0359578	0.5361	0.538862	FALSE	FALSE	FALSE	ieu-b-5124	7	24354300	0.0681945	NA	0.597997	HPC_noukb	Hypopharyngeal cancer (excl. UKB)	Hypopharyngeal cancer (excl. UKB) || ||	TRUE	igd	NA	NA	NA	NA	NA	NA	NA	7	24354300	0.0017	1.473e-11	717563	BMI_strict	TRUE	reported	HKLPXU	textfile	2	1	TRUE
	rs4482463	A	C	A	C	-0.031	-0.214288	0.917	0.911168	FALSE	FALSE	FALSE	ieu-b-5124	2	205375909	0.117152	NA	0.0673767	HPC_noukb	Hypopharyngeal cancer (excl. UKB)	Hypopharyngeal cancer (excl. UKB) || ||	TRUE	igd	NA	NA	NA	NA	NA	NA	NA	2	205375909	0.0031	4.848e-23	663850	BMI_strict	TRUE	reported	HKLPXU	textfile	2	1	TRUE
	rs4517716	C	G	C	G	-0.0117	-0.0251506	0.7924	0.799123	FALSE	TRUE	FALSE	ieu-b-5124	14	83013876	0.0847123	NA	0.766547	HPC_noukb	Hypopharyngeal cancer (excl. UKB)	Hypopharyngeal cancer (excl. UKB) || ||	TRUE	igd	NA	NA	NA	NA	NA	NA	NA	14	83013876	0.002	4.27e-09	806706	BMI_strict	TRUE	reported	HKLPXU	textfile	2	1	TRUE
	rs45486197	A	G	A	G	0.0279	0.210208	0.0635	0.0638575	FALSE	FALSE	FALSE	ieu-b-5124	19	2244849	0.132977	NA	0.113928	HPC_noukb	Hypopharyngeal cancer (excl. UKB)	Hypopharyngeal cancer (excl. UKB) || ||	TRUE	igd	NA	NA	NA	NA	NA	NA	NA	19	2244849	0.004	1.801e-12	484680	BMI_strict	TRUE	reported	HKLPXU	textfile	2	1	TRUE
	rs459552	A	T	A	T	-0.0133	-0.00312087	0.7747	0.758463	FALSE	TRUE	FALSE	ieu-b-5124	5	112176756	0.0806265	NA	0.969123	HPC_noukb	Hypopharyngeal cancer (excl. UKB)	Hypopharyngeal cancer (excl. UKB) || ||	TRUE	igd	NA	NA	NA	NA	NA	NA	NA	5	112176756	0.0019	8.356e-12	797086	BMI_strict	TRUE	reported	HKLPXU	textfile	2	1	TRUE
	rs4653017	T	C	T	C	0.0118	-0.0816955	0.6679	0.674701	FALSE	FALSE	FALSE	ieu-b-5124	1	33776728	0.0717276	NA	0.254716	HPC_noukb	Hypopharyngeal cancer (excl. UKB)	Hypopharyngeal cancer (excl. UKB) || ||	TRUE	igd	NA	NA	NA	NA	NA	NA	NA	1	33776728	0.0018	1.11e-10	716691	BMI_strict	TRUE	reported	HKLPXU	textfile	2	1	TRUE
	rs4655141	T	C	T	C	-0.0173	-0.0489981	0.8362	0.834313	FALSE	FALSE	FALSE	ieu-b-5124	1	23312025	0.0890477	NA	0.582151	HPC_noukb	Hypopharyngeal cancer (excl. UKB)	Hypopharyngeal cancer (excl. UKB) || ||	TRUE	igd	NA	NA	NA	NA	NA	NA	NA	1	23312025	0.0022	6.198e-15	718666	BMI_strict	TRUE	reported	HKLPXU	textfile	2	1	TRUE
	rs4700608	T	C	T	C	-0.0155	0.0857583	0.5236	0.507555	FALSE	FALSE	FALSE	ieu-b-5124	5	63026280	0.0677507	NA	0.205588	HPC_noukb	Hypopharyngeal cancer (excl. UKB)	Hypopharyngeal cancer (excl. UKB) || ||	TRUE	igd	NA	NA	NA	NA	NA	NA	NA	5	63026280	0.0017	4.324e-20	718693	BMI_strict	TRUE	reported	HKLPXU	textfile	2	1	TRUE
	rs4721089	T	C	T	C	0.0167	0.0952675	0.783	0.769477	FALSE	FALSE	FALSE	ieu-b-5124	7	1872921	0.0823363	NA	0.247251	HPC_noukb	Hypopharyngeal cancer (excl. UKB)	Hypopharyngeal cancer (excl. UKB) || ||	TRUE	igd	NA	NA	NA	NA	NA	NA	NA	7	1872921	0.0023	5.596e-13	484680	BMI_strict	TRUE	reported	HKLPXU	textfile	2	1	TRUE
	rs4740383	A	G	A	G	0.0131	-0.0708459	0.4185	0.403465	FALSE	FALSE	FALSE	ieu-b-5124	9	133788361	0.0689543	NA	0.304217	HPC_noukb	Hypopharyngeal cancer (excl. UKB)	Hypopharyngeal cancer (excl. UKB) || ||	TRUE	igd	TRUE	rs4740383	rs6597652	A	G	A	G	9	133783566	0.0018	7.028e-14	694837	BMI_strict	TRUE	reported	HKLPXU	textfile	2	1	TRUE
	rs4740619	T	C	T	C	0.0189	0.199633	0.5436	0.560238	FALSE	FALSE	FALSE	ieu-b-5124	9	15634326	0.0691484	NA	0.00388902	HPC_noukb	Hypopharyngeal cancer (excl. UKB)	Hypopharyngeal cancer (excl. UKB) || ||	TRUE	igd	NA	NA	NA	NA	NA	NA	NA	9	15634326	0.0016	3.147e-31	806567	BMI_strict	TRUE	reported	HKLPXU	textfile	2	1	TRUE
	rs474605	A	G	A	G	-0.0125	0.0301637	0.4679	0.486768	FALSE	FALSE	FALSE	ieu-b-5124	18	39612720	0.067759	NA	0.656203	HPC_noukb	Hypopharyngeal cancer (excl. UKB)	Hypopharyngeal cancer (excl. UKB) || ||	TRUE	igd	NA	NA	NA	NA	NA	NA	NA	18	39612720	0.0017	2.717e-13	718363	BMI_strict	TRUE	reported	HKLPXU	textfile	2	1	TRUE
	rs4771218	A	G	A	G	-0.0141	-0.0214022	0.6244	0.608313	FALSE	FALSE	FALSE	ieu-b-5124	13	28655311	0.0698693	NA	0.759362	HPC_noukb	Hypopharyngeal cancer (excl. UKB)	Hypopharyngeal cancer (excl. UKB) || ||	TRUE	igd	NA	NA	NA	NA	NA	NA	NA	13	28655311	0.0018	3.18e-15	717363	BMI_strict	TRUE	reported	HKLPXU	textfile	2	1	TRUE
	rs478707	T	C	T	C	-0.015	-0.088196	0.2032	0.192283	FALSE	FALSE	FALSE	ieu-b-5124	18	7543207	0.088084	NA	0.316696	HPC_noukb	Hypopharyngeal cancer (excl. UKB)	Hypopharyngeal cancer (excl. UKB) || ||	TRUE	igd	NA	NA	NA	NA	NA	NA	NA	18	7543207	0.0024	1.983e-10	484680	BMI_strict	TRUE	reported	HKLPXU	textfile	2	1	TRUE
	rs4812405	A	C	A	C	-0.0202	0.0188625	0.0763	0.0707562	FALSE	FALSE	FALSE	ieu-b-5124	20	35276585	0.128912	NA	0.883668	HPC_noukb	Hypopharyngeal cancer (excl. UKB)	Hypopharyngeal cancer (excl. UKB) || ||	TRUE	igd	NA	NA	NA	NA	NA	NA	NA	20	35276585	0.0033	1.279e-09	706013	BMI_strict	TRUE	reported	HKLPXU	textfile	2	1	TRUE
	rs4813619	T	G	T	G	-0.0106	-0.0137549	0.5305	0.513859	FALSE	FALSE	FALSE	ieu-b-5124	20	2815715	0.0680782	NA	0.839882	HPC_noukb	Hypopharyngeal cancer (excl. UKB)	Hypopharyngeal cancer (excl. UKB) || ||	TRUE	igd	NA	NA	NA	NA	NA	NA	NA	20	2815715	0.0018	1.695e-09	664186	BMI_strict	TRUE	reported	HKLPXU	textfile	2	1	TRUE
	rs4858193	T	C	T	C	0.0133	0.0506911	0.7199	0.722713	FALSE	FALSE	FALSE	ieu-b-5124	3	20441050	0.0758888	NA	0.504156	HPC_noukb	Hypopharyngeal cancer (excl. UKB)	Hypopharyngeal cancer (excl. UKB) || ||	TRUE	igd	NA	NA	NA	NA	NA	NA	NA	3	20441050	0.0019	2.444e-12	718071	BMI_strict	TRUE	reported	HKLPXU	textfile	2	1	TRUE
	rs4864201	T	C	T	C	0.0137	0.0572775	0.3471	0.345143	FALSE	FALSE	FALSE	ieu-b-5124	4	130731284	0.0701415	NA	0.414157	HPC_noukb	Hypopharyngeal cancer (excl. UKB)	Hypopharyngeal cancer (excl. UKB) || ||	TRUE	igd	NA	NA	NA	NA	NA	NA	NA	4	130731284	0.0017	4.298e-16	806465	BMI_strict	TRUE	reported	HKLPXU	textfile	2	1	TRUE
	rs4880341	T	C	T	C	-0.013	0.153981	0.5725	0.566088	FALSE	FALSE	FALSE	ieu-b-5124	10	133992689	0.0701528	NA	0.0281683	HPC_noukb	Hypopharyngeal cancer (excl. UKB)	Hypopharyngeal cancer (excl. UKB) || ||	TRUE	igd	NA	NA	NA	NA	NA	NA	NA	10	133992689	0.0017	3.059e-14	716038	BMI_strict	TRUE	reported	HKLPXU	textfile	2	1	TRUE
	rs4900714	T	G	T	G	0.015	-0.0374666	0.4776	0.51275	FALSE	FALSE	FALSE	ieu-b-5124	14	47302219	0.0674643	NA	0.578651	HPC_noukb	Hypopharyngeal cancer (excl. UKB)	Hypopharyngeal cancer (excl. UKB) || ||	TRUE	igd	NA	NA	NA	NA	NA	NA	NA	14	47302219	0.0017	1.001e-18	718662	BMI_strict	TRUE	reported	HKLPXU	textfile	2	1	TRUE
	rs4906263	C	G	C	G	-0.0176	-0.0532723	0.6562	0.649511	FALSE	TRUE	FALSE	ieu-b-5124	14	103249127	0.0710973	NA	0.453684	HPC_noukb	Hypopharyngeal cancer (excl. UKB)	Hypopharyngeal cancer (excl. UKB) || ||	TRUE	igd	NA	NA	NA	NA	NA	NA	NA	14	103249127	0.0018	8.106e-23	718534	BMI_strict	TRUE	reported	HKLPXU	textfile	2	1	TRUE
	rs4973618	A	G	A	G	-0.0148	0.0794566	0.6623	0.659692	FALSE	FALSE	FALSE	ieu-b-5124	2	229002620	0.0718089	NA	0.26851	HPC_noukb	Hypopharyngeal cancer (excl. UKB)	Hypopharyngeal cancer (excl. UKB) || ||	TRUE	igd	NA	NA	NA	NA	NA	NA	NA	2	229002620	0.0018	1.252e-16	706944	BMI_strict	TRUE	reported	HKLPXU	textfile	2	1	TRUE
	rs4981693	A	G	A	G	0.0202	0.0642869	0.7743	0.766687	FALSE	FALSE	FALSE	ieu-b-5124	14	29680331	0.080681	NA	0.425565	HPC_noukb	Hypopharyngeal cancer (excl. UKB)	Hypopharyngeal cancer (excl. UKB) || ||	TRUE	igd	NA	NA	NA	NA	NA	NA	NA	14	29680331	0.002	7.894e-24	718593	BMI_strict	TRUE	reported	HKLPXU	textfile	2	1	TRUE
	rs4986044	T	C	T	C	-0.0177	-0.0476261	0.455	0.458716	FALSE	FALSE	FALSE	ieu-b-5124	17	21261560	0.0685433	NA	0.487162	HPC_noukb	Hypopharyngeal cancer (excl. UKB)	Hypopharyngeal cancer (excl. UKB) || ||	TRUE	igd	NA	NA	NA	NA	NA	NA	NA	17	21261560	0.0016	1.269e-27	802591	BMI_strict	TRUE	reported	HKLPXU	textfile	2	1	TRUE
	rs4988235	A	G	A	G	0.0124	-0.0376653	0.7206	0.653058	FALSE	FALSE	FALSE	ieu-b-5124	2	136608646	0.0798273	NA	0.637045	HPC_noukb	Hypopharyngeal cancer (excl. UKB)	Hypopharyngeal cancer (excl. UKB) || ||	TRUE	igd	NA	NA	NA	NA	NA	NA	NA	2	136608646	0.0017	7.094e-13	796039	BMI_strict	TRUE	reported	HKLPXU	textfile	2	1	TRUE
	rs543874	A	G	A	G	-0.0479	-0.0156057	0.7786	0.804423	FALSE	FALSE	FALSE	ieu-b-5124	1	177889480	0.0848577	NA	0.854089	HPC_noukb	Hypopharyngeal cancer (excl. UKB)	Hypopharyngeal cancer (excl. UKB) || ||	TRUE	igd	NA	NA	NA	NA	NA	NA	NA	1	177889480	0.002	3.06e-125	806688	BMI_strict	TRUE	reported	HKLPXU	textfile	2	1	TRUE
	rs56151256	A	C	A	C	0.0166	-0.0588895	0.7555	0.756082	FALSE	FALSE	FALSE	ieu-b-5124	15	78024806	0.077364	NA	0.446537	HPC_noukb	Hypopharyngeal cancer (excl. UKB)	Hypopharyngeal cancer (excl. UKB) || ||	TRUE	igd	NA	NA	NA	NA	NA	NA	NA	15	78024806	0.0022	6.187e-14	484680	BMI_strict	TRUE	reported	HKLPXU	textfile	2	1	TRUE
	rs56161855	A	T	A	T	-0.0233	0.198466	0.8678	0.86254	FALSE	TRUE	FALSE	ieu-b-5124	17	46288649	0.104401	NA	0.057302	HPC_noukb	Hypopharyngeal cancer (excl. UKB)	Hypopharyngeal cancer (excl. UKB) || ||	TRUE	igd	NA	NA	NA	NA	NA	NA	NA	17	46288649	0.0028	1.408e-16	484680	BMI_strict	TRUE	reported	HKLPXU	textfile	2	1	TRUE
	rs562664	T	C	T	C	-0.0138	-0.148773	0.1873	0.194148	FALSE	FALSE	FALSE	ieu-b-5124	11	63823619	0.0888742	NA	0.0941369	HPC_noukb	Hypopharyngeal cancer (excl. UKB)	Hypopharyngeal cancer (excl. UKB) || ||	TRUE	igd	NA	NA	NA	NA	NA	NA	NA	11	63823619	0.0022	4.15e-10	696578	BMI_strict	TRUE	reported	HKLPXU	textfile	2	1	TRUE
	rs570463	A	C	A	C	-0.0121	0.20949	0.3266	0.312771	FALSE	FALSE	FALSE	ieu-b-5124	11	28739318	0.0706035	NA	0.00300587	HPC_noukb	Hypopharyngeal cancer (excl. UKB)	Hypopharyngeal cancer (excl. UKB) || ||	TRUE	igd	NA	NA	NA	NA	NA	NA	NA	11	28739318	0.0018	4.33e-11	718580	BMI_strict	TRUE	reported	HKLPXU	textfile	2	1	TRUE
	rs57989773	T	C	T	C	-0.0142	0.159249	0.7576	0.772402	FALSE	FALSE	FALSE	ieu-b-5124	6	100629078	0.0855122	NA	0.0625605	HPC_noukb	Hypopharyngeal cancer (excl. UKB)	Hypopharyngeal cancer (excl. UKB) || ||	TRUE	igd	NA	NA	NA	NA	NA	NA	NA	6	100629078	0.0023	5.63e-10	484680	BMI_strict	TRUE	reported	HKLPXU	textfile	2	1	TRUE
	rs587271	T	C	T	C	0.012	0.101233	0.69	0.671008	FALSE	FALSE	FALSE	ieu-b-5124	1	54743111	0.0772877	NA	0.190256	HPC_noukb	Hypopharyngeal cancer (excl. UKB)	Hypopharyngeal cancer (excl. UKB) || ||	TRUE	igd	NA	NA	NA	NA	NA	NA	NA	1	54743111	0.0018	6.208e-11	789324	BMI_strict	TRUE	reported	HKLPXU	textfile	2	1	TRUE
	rs592483	T	C	T	C	-0.0137	-0.0437681	0.5933	0.569418	FALSE	FALSE	FALSE	ieu-b-5124	11	69445173	0.0693136	NA	0.527746	HPC_noukb	Hypopharyngeal cancer (excl. UKB)	Hypopharyngeal cancer (excl. UKB) || ||	TRUE	igd	NA	NA	NA	NA	NA	NA	NA	11	69445173	0.0017	1.525e-16	802791	BMI_strict	TRUE	reported	HKLPXU	textfile	2	1	TRUE
	rs59302296	A	T	A	T	0.0217	0.100734	0.0991	0.10752	FALSE	TRUE	FALSE	ieu-b-5124	3	9507314	0.107655	NA	0.349421	HPC_noukb	Hypopharyngeal cancer (excl. UKB)	Hypopharyngeal cancer (excl. UKB) || ||	TRUE	igd	NA	NA	NA	NA	NA	NA	NA	3	9507314	0.0032	9.124e-12	484680	BMI_strict	TRUE	reported	HKLPXU	textfile	2	1	TRUE
	rs6010784	T	C	T	C	0.0106	0.00307014	0.5062	0.495719	FALSE	FALSE	FALSE	ieu-b-5124	20	61540319	0.0672545	NA	0.96359	HPC_noukb	Hypopharyngeal cancer (excl. UKB)	Hypopharyngeal cancer (excl. UKB) || ||	TRUE	igd	NA	NA	NA	NA	NA	NA	NA	20	61540319	0.0016	6.906e-11	803088	BMI_strict	TRUE	reported	HKLPXU	textfile	2	1	TRUE
	rs61740466	A	G	A	G	-0.0142	0.1486	0.2346	0.234934	FALSE	FALSE	FALSE	ieu-b-5124	1	19934900	0.0766939	NA	0.0526744	HPC_noukb	Hypopharyngeal cancer (excl. UKB)	Hypopharyngeal cancer (excl. UKB) || ||	TRUE	igd	NA	NA	NA	NA	NA	NA	NA	1	19934900	0.0022	2.24e-10	484680	BMI_strict	TRUE	reported	HKLPXU	textfile	2	1	TRUE
	rs61813324	T	C	T	C	0.0289	-0.0507399	0.1312	0.137554	FALSE	FALSE	FALSE	ieu-b-5124	1	156049877	0.104737	NA	0.628066	HPC_noukb	Hypopharyngeal cancer (excl. UKB)	Hypopharyngeal cancer (excl. UKB) || ||	TRUE	igd	NA	NA	NA	NA	NA	NA	NA	1	156049877	0.0028	3.196e-24	484680	BMI_strict	TRUE	reported	HKLPXU	textfile	2	1	TRUE
	rs61828641	A	G	A	G	0.0223	0.0549202	0.1092	0.10572	FALSE	FALSE	FALSE	ieu-b-5124	1	174321997	0.132943	NA	0.679526	HPC_noukb	Hypopharyngeal cancer (excl. UKB)	Hypopharyngeal cancer (excl. UKB) || ||	TRUE	igd	NA	NA	NA	NA	NA	NA	NA	1	174321997	0.003	2.492e-13	484680	BMI_strict	TRUE	reported	HKLPXU	textfile	2	1	TRUE
	rs62176243	A	T	A	T	0.0148	0.00142445	0.7571	0.752372	FALSE	TRUE	FALSE	ieu-b-5124	2	166190881	0.0775088	NA	0.985337	HPC_noukb	Hypopharyngeal cancer (excl. UKB)	Hypopharyngeal cancer (excl. UKB) || ||	TRUE	igd	NA	NA	NA	NA	NA	NA	NA	2	166190881	0.0022	2.411e-11	484680	BMI_strict	TRUE	reported	HKLPXU	textfile	2	1	TRUE
	rs6265	T	C	T	C	-0.0413	0.145883	0.1836	0.185708	FALSE	FALSE	FALSE	ieu-b-5124	11	27679916	0.0824584	NA	0.0768652	HPC_noukb	Hypopharyngeal cancer (excl. UKB)	Hypopharyngeal cancer (excl. UKB) || ||	TRUE	igd	NA	NA	NA	NA	NA	NA	NA	11	27679916	0.0021	7.399e-89	806782	BMI_strict	TRUE	reported	HKLPXU	textfile	2	1	TRUE
	rs6443750	T	C	T	C	-0.0152	0.0233657	0.1994	0.207777	FALSE	FALSE	FALSE	ieu-b-5124	3	181329682	0.0919339	NA	0.799374	HPC_noukb	Hypopharyngeal cancer (excl. UKB)	Hypopharyngeal cancer (excl. UKB) || ||	TRUE	igd	NA	NA	NA	NA	NA	NA	NA	3	181329682	0.0021	7.252e-13	792002	BMI_strict	TRUE	reported	HKLPXU	textfile	2	1	TRUE
	rs6463489	T	C	T	C	0.0167	-0.209652	0.0959	0.11459	FALSE	FALSE	FALSE	ieu-b-5124	7	5542513	0.117455	NA	0.0742677	HPC_noukb	Hypopharyngeal cancer (excl. UKB)	Hypopharyngeal cancer (excl. UKB) || ||	TRUE	igd	NA	NA	NA	NA	NA	NA	NA	7	5542513	0.0026	2.504e-10	805923	BMI_strict	TRUE	reported	HKLPXU	textfile	2	1	TRUE
	rs6468266	A	T	A	T	-0.0113	0.0154418	0.4176	0.388819	FALSE	TRUE	FALSE	ieu-b-5124	8	34380276	0.0688031	NA	0.822419	HPC_noukb	Hypopharyngeal cancer (excl. UKB)	Hypopharyngeal cancer (excl. UKB) || ||	TRUE	igd	NA	NA	NA	NA	NA	NA	NA	8	34380276	0.0017	7.708e-11	718278	BMI_strict	TRUE	reported	HKLPXU	textfile	2	1	TRUE
	rs6493498	T	C	T	C	0.0137	0.115628	0.4465	0.446906	FALSE	FALSE	FALSE	ieu-b-5124	15	51754451	0.067897	NA	0.0885686	HPC_noukb	Hypopharyngeal cancer (excl. UKB)	Hypopharyngeal cancer (excl. UKB) || ||	TRUE	igd	NA	NA	NA	NA	NA	NA	NA	15	51754451	0.0016	4.838e-17	805967	BMI_strict	TRUE	reported	HKLPXU	textfile	2	1	TRUE
	rs6496248	A	T	A	T	0.0104	0.00681195	0.6352	0.621139	FALSE	TRUE	FALSE	ieu-b-5124	15	98262923	0.0696202	NA	0.922056	HPC_noukb	Hypopharyngeal cancer (excl. UKB)	Hypopharyngeal cancer (excl. UKB) || ||	TRUE	igd	NA	NA	NA	NA	NA	NA	NA	15	98262923	0.0018	2.929e-09	717972	BMI_strict	TRUE	reported	HKLPXU	textfile	2	1	TRUE
	rs6500208	A	G	A	G	0.0146	-0.0331927	0.2021	0.206553	FALSE	FALSE	FALSE	ieu-b-5124	16	49011249	0.0852682	NA	0.697074	HPC_noukb	Hypopharyngeal cancer (excl. UKB)	Hypopharyngeal cancer (excl. UKB) || ||	TRUE	igd	NA	NA	NA	NA	NA	NA	NA	16	49011249	0.002	3.211e-13	794515	BMI_strict	TRUE	reported	HKLPXU	textfile	2	1	TRUE
	rs650198	T	C	T	C	-0.0137	0.0792597	0.7294	0.710593	FALSE	FALSE	FALSE	ieu-b-5124	12	69674595	0.0766769	NA	0.301284	HPC_noukb	Hypopharyngeal cancer (excl. UKB)	Hypopharyngeal cancer (excl. UKB) || ||	TRUE	igd	NA	NA	NA	NA	NA	NA	NA	12	69674595	0.0019	6.425e-13	714521	BMI_strict	TRUE	reported	HKLPXU	textfile	2	1	TRUE
	rs6512302	C	G	C	G	0.0134	0.0628119	0.7391	0.738663	FALSE	TRUE	FALSE	ieu-b-5124	20	62691550	0.0803324	NA	0.434273	HPC_noukb	Hypopharyngeal cancer (excl. UKB)	Hypopharyngeal cancer (excl. UKB) || ||	TRUE	igd	NA	NA	NA	NA	NA	NA	NA	20	62691550	0.002	1.522e-11	718338	BMI_strict	TRUE	reported	HKLPXU	textfile	2	1	TRUE
	rs6539064	C	G	C	G	0.0194	-0.152075	0.7468	0.749652	FALSE	TRUE	FALSE	ieu-b-5124	12	103706754	0.0745935	NA	0.0414792	HPC_noukb	Hypopharyngeal cancer (excl. UKB)	Hypopharyngeal cancer (excl. UKB) || ||	TRUE	igd	NA	NA	NA	NA	NA	NA	NA	12	103706754	0.0019	1.135e-23	718487	BMI_strict	TRUE	reported	HKLPXU	textfile	2	1	TRUE
	rs6545714	A	G	A	G	-0.0194	0.116205	0.6112	0.601305	FALSE	FALSE	FALSE	ieu-b-5124	2	59307725	0.0696235	NA	0.0951065	HPC_noukb	Hypopharyngeal cancer (excl. UKB)	Hypopharyngeal cancer (excl. UKB) || ||	TRUE	igd	NA	NA	NA	NA	NA	NA	NA	2	59307725	0.0016	4.013e-32	806783	BMI_strict	TRUE	reported	HKLPXU	textfile	2	1	TRUE
	rs6556301	T	G	T	G	-0.0113	-0.167005	0.3707	0.365251	FALSE	FALSE	FALSE	ieu-b-5124	5	176527577	0.0717765	NA	0.0199793	HPC_noukb	Hypopharyngeal cancer (excl. UKB)	Hypopharyngeal cancer (excl. UKB) || ||	TRUE	igd	NA	NA	NA	NA	NA	NA	NA	5	176527577	0.0017	8.137e-11	767716	BMI_strict	TRUE	reported	HKLPXU	textfile	2	1	TRUE
	rs6567160	T	C	T	C	-0.0552	-0.165939	0.7518	0.764622	FALSE	FALSE	FALSE	ieu-b-5124	18	57829135	0.0767403	NA	0.0305914	HPC_noukb	Hypopharyngeal cancer (excl. UKB)	Hypopharyngeal cancer (excl. UKB) || ||	TRUE	igd	NA	NA	NA	NA	NA	NA	NA	18	57829135	0.0019	7.82e-184	806638	BMI_strict	TRUE	reported	HKLPXU	textfile	2	1	TRUE
	rs657452	A	G	A	G	0.0188	0.099681	0.4042	0.387792	FALSE	FALSE	FALSE	ieu-b-5124	1	49589847	0.0688949	NA	0.147938	HPC_noukb	Hypopharyngeal cancer (excl. UKB)	Hypopharyngeal cancer (excl. UKB) || ||	TRUE	igd	NA	NA	NA	NA	NA	NA	NA	1	49589847	0.0016	3.172e-30	798331	BMI_strict	TRUE	reported	HKLPXU	textfile	2	1	TRUE
	rs6591407	A	C	A	C	-0.0124	0.0927684	0.1984	0.192797	FALSE	FALSE	FALSE	ieu-b-5124	11	56914157	0.0840705	NA	0.269828	HPC_noukb	Hypopharyngeal cancer (excl. UKB)	Hypopharyngeal cancer (excl. UKB) || ||	TRUE	igd	NA	NA	NA	NA	NA	NA	NA	11	56914157	0.0021	3.583e-09	806782	BMI_strict	TRUE	reported	HKLPXU	textfile	2	1	TRUE
	rs6607337	T	C	T	C	-0.0124	0.0609997	0.2978	0.291031	FALSE	FALSE	FALSE	ieu-b-5124	17	35057373	0.0748632	NA	0.415178	HPC_noukb	Hypopharyngeal cancer (excl. UKB)	Hypopharyngeal cancer (excl. UKB) || ||	TRUE	igd	NA	NA	NA	NA	NA	NA	NA	17	35057373	0.0019	2.548e-11	718656	BMI_strict	TRUE	reported	HKLPXU	textfile	2	1	TRUE
	rs6656785	A	G	A	G	-0.0178	-0.0965955	0.6125	0.620883	FALSE	FALSE	FALSE	ieu-b-5124	1	75005776	0.070021	NA	0.167734	HPC_noukb	Hypopharyngeal cancer (excl. UKB)	Hypopharyngeal cancer (excl. UKB) || ||	TRUE	igd	NA	NA	NA	NA	NA	NA	NA	1	75005776	0.0016	3.056e-27	806090	BMI_strict	TRUE	reported	HKLPXU	textfile	2	1	TRUE
	rs66595146	A	C	A	C	0.0135	-0.0299225	0.6291	0.622596	FALSE	FALSE	FALSE	ieu-b-5124	18	58204315	0.0694453	NA	0.666557	HPC_noukb	Hypopharyngeal cancer (excl. UKB)	Hypopharyngeal cancer (excl. UKB) || ||	TRUE	igd	NA	NA	NA	NA	NA	NA	NA	18	58204315	0.002	9.093e-12	484680	BMI_strict	TRUE	reported	HKLPXU	textfile	2	1	TRUE
	rs6661316	T	C	T	C	0.012	0.0363734	0.5893	0.570514	FALSE	FALSE	FALSE	ieu-b-5124	1	210095527	0.0690433	NA	0.598319	HPC_noukb	Hypopharyngeal cancer (excl. UKB)	Hypopharyngeal cancer (excl. UKB) || ||	TRUE	igd	NA	NA	NA	NA	NA	NA	NA	1	210095527	0.0016	1.721e-13	806610	BMI_strict	TRUE	reported	HKLPXU	textfile	2	1	TRUE
	rs6696828	C	G	C	G	0.012	-0.00620804	0.2976	0.298362	FALSE	TRUE	FALSE	ieu-b-5124	1	80812020	0.0743307	NA	0.933439	HPC_noukb	Hypopharyngeal cancer (excl. UKB)	Hypopharyngeal cancer (excl. UKB) || ||	TRUE	igd	NA	NA	NA	NA	NA	NA	NA	1	80812020	0.0018	6.415e-11	718664	BMI_strict	TRUE	reported	HKLPXU	textfile	2	1	TRUE
	rs6716898	A	G	A	G	0.0127	-0.0646603	0.4873	0.484455	FALSE	FALSE	FALSE	ieu-b-5124	2	198944271	0.0686042	NA	0.345931	HPC_noukb	Hypopharyngeal cancer (excl. UKB)	Hypopharyngeal cancer (excl. UKB) || ||	TRUE	igd	NA	NA	NA	NA	NA	NA	NA	2	198944271	0.0019	2.33e-11	484680	BMI_strict	TRUE	reported	HKLPXU	textfile	2	1	TRUE
	rs6720868	T	C	T	C	0.0154	-0.0399555	0.3083	0.318923	FALSE	FALSE	FALSE	ieu-b-5124	2	230663576	0.0729942	NA	0.584119	HPC_noukb	Hypopharyngeal cancer (excl. UKB)	Hypopharyngeal cancer (excl. UKB) || ||	TRUE	igd	NA	NA	NA	NA	NA	NA	NA	2	230663576	0.0018	1.824e-17	718504	BMI_strict	TRUE	reported	HKLPXU	textfile	2	1	TRUE
	rs6725931	T	C	T	C	0.0187	0.072172	0.8483	0.84206	FALSE	FALSE	FALSE	ieu-b-5124	2	220205146	0.0984449	NA	0.463484	HPC_noukb	Hypopharyngeal cancer (excl. UKB)	Hypopharyngeal cancer (excl. UKB) || ||	TRUE	igd	NA	NA	NA	NA	NA	NA	NA	2	220205146	0.0024	2.297e-15	718689	BMI_strict	TRUE	reported	HKLPXU	textfile	2	1	TRUE
	rs6804842	A	G	A	G	-0.0141	0.0487779	0.4301	0.421033	FALSE	FALSE	FALSE	ieu-b-5124	3	25106437	0.0686842	NA	0.477595	HPC_noukb	Hypopharyngeal cancer (excl. UKB)	Hypopharyngeal cancer (excl. UKB) || ||	TRUE	igd	NA	NA	NA	NA	NA	NA	NA	3	25106437	0.0016	7.57e-18	806143	BMI_strict	TRUE	reported	HKLPXU	textfile	2	1	TRUE
	rs6808814	T	C	T	C	0.0118	0.117633	0.7335	0.741123	FALSE	FALSE	FALSE	ieu-b-5124	3	116852469	0.0798635	NA	0.140769	HPC_noukb	Hypopharyngeal cancer (excl. UKB)	Hypopharyngeal cancer (excl. UKB) || ||	TRUE	igd	NA	NA	NA	NA	NA	NA	NA	3	116852469	0.0019	1.305e-09	718249	BMI_strict	TRUE	reported	HKLPXU	textfile	2	1	TRUE
	rs6850421	A	G	A	G	0.0113	-0.10134	0.4564	0.471924	FALSE	FALSE	FALSE	ieu-b-5124	4	180187034	0.06826	NA	0.137645	HPC_noukb	Hypopharyngeal cancer (excl. UKB)	Hypopharyngeal cancer (excl. UKB) || ||	TRUE	igd	NA	NA	NA	NA	NA	NA	NA	4	180187034	0.0019	3.657e-09	484680	BMI_strict	TRUE	reported	HKLPXU	textfile	2	1	TRUE
	rs6864049	A	G	A	G	-0.0121	-0.0546499	0.489	0.476931	FALSE	FALSE	FALSE	ieu-b-5124	5	124330522	0.0676901	NA	0.419463	HPC_noukb	Hypopharyngeal cancer (excl. UKB)	Hypopharyngeal cancer (excl. UKB) || ||	TRUE	igd	NA	NA	NA	NA	NA	NA	NA	5	124330522	0.0016	1.475e-13	806604	BMI_strict	TRUE	reported	HKLPXU	textfile	2	1	TRUE
	rs687339	T	C	T	C	0.0188	0.0259091	0.7697	0.776705	FALSE	FALSE	FALSE	ieu-b-5124	3	135932359	0.0817881	NA	0.751408	HPC_noukb	Hypopharyngeal cancer (excl. UKB)	Hypopharyngeal cancer (excl. UKB) || ||	TRUE	igd	NA	NA	NA	NA	NA	NA	NA	3	135932359	0.0019	4.317e-22	806723	BMI_strict	TRUE	reported	HKLPXU	textfile	2	1	TRUE
	rs6882366	T	C	T	C	-0.0131	0.0657366	0.3959	0.387211	FALSE	FALSE	FALSE	ieu-b-5124	5	95864693	0.0684359	NA	0.336775	HPC_noukb	Hypopharyngeal cancer (excl. UKB)	Hypopharyngeal cancer (excl. UKB) || ||	TRUE	igd	NA	NA	NA	NA	NA	NA	NA	5	95864693	0.0017	4.387e-14	718668	BMI_strict	TRUE	reported	HKLPXU	textfile	2	1	TRUE
	rs6886072	T	C	T	C	-0.01	0.124447	0.4665	0.480674	FALSE	FALSE	FALSE	ieu-b-5124	5	136598460	0.0683662	NA	0.0687132	HPC_noukb	Hypopharyngeal cancer (excl. UKB)	Hypopharyngeal cancer (excl. UKB) || ||	TRUE	igd	NA	NA	NA	NA	NA	NA	NA	5	136598460	0.0017	4.125e-09	718327	BMI_strict	TRUE	reported	HKLPXU	textfile	2	1	TRUE
	rs6890310	A	G	A	G	-0.0119	-0.00908834	0.2923	0.281082	FALSE	FALSE	FALSE	ieu-b-5124	5	27193573	0.0757107	NA	0.904451	HPC_noukb	Hypopharyngeal cancer (excl. UKB)	Hypopharyngeal cancer (excl. UKB) || ||	TRUE	igd	NA	NA	NA	NA	NA	NA	NA	5	27193573	0.0019	3.287e-10	718622	BMI_strict	TRUE	reported	HKLPXU	textfile	2	1	TRUE
	rs6893539	A	C	A	C	-0.0122	-0.0311541	0.6981	0.702495	FALSE	FALSE	FALSE	ieu-b-5124	5	122705737	0.0737066	NA	0.672531	HPC_noukb	Hypopharyngeal cancer (excl. UKB)	Hypopharyngeal cancer (excl. UKB) || ||	TRUE	igd	NA	NA	NA	NA	NA	NA	NA	5	122705737	0.0019	6.165e-11	718648	BMI_strict	TRUE	reported	HKLPXU	textfile	2	1	TRUE
	rs6909685	T	C	T	C	-0.0149	-0.066014	0.3295	0.321691	FALSE	FALSE	FALSE	ieu-b-5124	6	97753952	0.07303	NA	0.366033	HPC_noukb	Hypopharyngeal cancer (excl. UKB)	Hypopharyngeal cancer (excl. UKB) || ||	TRUE	igd	NA	NA	NA	NA	NA	NA	NA	6	97753952	0.0018	2.782e-16	717696	BMI_strict	TRUE	reported	HKLPXU	textfile	2	1	TRUE
	rs6922607	A	G	A	G	-0.013	-0.0856467	0.808	0.811309	FALSE	FALSE	FALSE	ieu-b-5124	6	142703483	0.0839527	NA	0.307644	HPC_noukb	Hypopharyngeal cancer (excl. UKB)	Hypopharyngeal cancer (excl. UKB) || ||	TRUE	igd	NA	NA	NA	NA	NA	NA	NA	6	142703483	0.0022	1.851e-09	706729	BMI_strict	TRUE	reported	HKLPXU	textfile	2	1	TRUE
	rs6950388	A	G	A	G	0.0135	-0.0459753	0.7782	0.757225	FALSE	FALSE	FALSE	ieu-b-5124	7	1270699	0.0881552	NA	0.601999	HPC_noukb	Hypopharyngeal cancer (excl. UKB)	Hypopharyngeal cancer (excl. UKB) || ||	TRUE	igd	NA	NA	NA	NA	NA	NA	NA	7	1270699	0.0022	1.588e-09	484680	BMI_strict	TRUE	reported	HKLPXU	textfile	2	1	TRUE
	rs698147	A	G	A	G	0.0116	0.0354912	0.447	0.45876	FALSE	FALSE	FALSE	ieu-b-5124	5	3513485	0.0672826	NA	0.59785	HPC_noukb	Hypopharyngeal cancer (excl. UKB)	Hypopharyngeal cancer (excl. UKB) || ||	TRUE	igd	NA	NA	NA	NA	NA	NA	NA	5	3513485	0.0017	9.672e-12	716805	BMI_strict	TRUE	reported	HKLPXU	textfile	2	1	TRUE
	rs7024334	T	G	T	G	0.0135	0.0866964	0.2254	0.232839	FALSE	FALSE	FALSE	ieu-b-5124	9	109072075	0.0810545	NA	0.284796	HPC_noukb	Hypopharyngeal cancer (excl. UKB)	Hypopharyngeal cancer (excl. UKB) || ||	TRUE	igd	NA	NA	NA	NA	NA	NA	NA	9	109072075	0.002	4.708e-12	799813	BMI_strict	TRUE	reported	HKLPXU	textfile	2	1	TRUE
	rs7025938	C	G	C	G	-0.0162	-0.00713971	0.6798	0.675498	FALSE	TRUE	FALSE	ieu-b-5124	9	103088321	0.0724296	NA	0.921476	HPC_noukb	Hypopharyngeal cancer (excl. UKB)	Hypopharyngeal cancer (excl. UKB) || ||	TRUE	igd	NA	NA	NA	NA	NA	NA	NA	9	103088321	0.0018	1.47e-19	717817	BMI_strict	TRUE	reported	HKLPXU	textfile	2	1	TRUE
	rs7070670	T	C	T	C	-0.0126	0.00907597	0.3228	0.316966	FALSE	FALSE	FALSE	ieu-b-5124	10	61842645	0.0725522	NA	0.900448	HPC_noukb	Hypopharyngeal cancer (excl. UKB)	Hypopharyngeal cancer (excl. UKB) || ||	TRUE	igd	NA	NA	NA	NA	NA	NA	NA	10	61842645	0.0021	7.143e-10	484680	BMI_strict	TRUE	reported	HKLPXU	textfile	2	1	TRUE
	rs7084454	A	G	A	G	0.0198	-0.0633032	0.3086	0.329779	FALSE	FALSE	FALSE	ieu-b-5124	10	21821274	0.0728097	NA	0.38461	HPC_noukb	Hypopharyngeal cancer (excl. UKB)	Hypopharyngeal cancer (excl. UKB) || ||	TRUE	igd	NA	NA	NA	NA	NA	NA	NA	10	21821274	0.0018	4.505e-27	706792	BMI_strict	TRUE	reported	HKLPXU	textfile	2	1	TRUE
	rs7102454	T	C	T	C	-0.0168	-0.0302062	0.6437	0.651798	FALSE	FALSE	FALSE	ieu-b-5124	11	65594820	0.0701543	NA	0.666784	HPC_noukb	Hypopharyngeal cancer (excl. UKB)	Hypopharyngeal cancer (excl. UKB) || ||	TRUE	igd	NA	NA	NA	NA	NA	NA	NA	11	65594820	0.0018	3.839e-21	718609	BMI_strict	TRUE	reported	HKLPXU	textfile	2	1	TRUE
	rs7124681	A	C	A	C	0.0257	-0.125886	0.4162	0.406656	FALSE	FALSE	FALSE	ieu-b-5124	11	47529947	0.0705935	NA	0.0745453	HPC_noukb	Hypopharyngeal cancer (excl. UKB)	Hypopharyngeal cancer (excl. UKB) || ||	TRUE	igd	NA	NA	NA	NA	NA	NA	NA	11	47529947	0.0016	3.956e-55	806656	BMI_strict	TRUE	reported	HKLPXU	textfile	2	1	TRUE
	rs7138803	A	G	A	G	0.0297	-0.0841898	0.387	0.375098	FALSE	FALSE	FALSE	ieu-b-5124	12	50247468	0.0702594	NA	0.230812	HPC_noukb	Hypopharyngeal cancer (excl. UKB)	Hypopharyngeal cancer (excl. UKB) || ||	TRUE	igd	NA	NA	NA	NA	NA	NA	NA	12	50247468	0.0017	3.095e-71	806772	BMI_strict	TRUE	reported	HKLPXU	textfile	2	1	TRUE
	rs7144011	T	G	T	G	0.0263	-0.104553	0.2334	0.220726	FALSE	FALSE	FALSE	ieu-b-5124	14	79940383	0.0836852	NA	0.211532	HPC_noukb	Hypopharyngeal cancer (excl. UKB)	Hypopharyngeal cancer (excl. UKB) || ||	TRUE	igd	NA	NA	NA	NA	NA	NA	NA	14	79940383	0.002	2.374e-40	806721	BMI_strict	TRUE	reported	HKLPXU	textfile	2	1	TRUE
	rs7161194	A	G	A	G	0.019	-0.032591	0.3437	0.352211	FALSE	FALSE	FALSE	ieu-b-5124	14	101529005	0.0748406	NA	0.663221	HPC_noukb	Hypopharyngeal cancer (excl. UKB)	Hypopharyngeal cancer (excl. UKB) || ||	TRUE	igd	NA	NA	NA	NA	NA	NA	NA	14	101529005	0.0019	2.23e-24	773952	BMI_strict	TRUE	reported	HKLPXU	textfile	2	1	TRUE
	rs7171864	A	G	A	G	0.0132	0.0614387	0.6935	0.663135	FALSE	FALSE	FALSE	ieu-b-5124	15	73227249	0.0733408	NA	0.402191	HPC_noukb	Hypopharyngeal cancer (excl. UKB)	Hypopharyngeal cancer (excl. UKB) || ||	TRUE	igd	NA	NA	NA	NA	NA	NA	NA	15	73227249	0.0017	2.6e-14	806698	BMI_strict	TRUE	reported	HKLPXU	textfile	2	1	TRUE
	rs7172627	A	G	A	G	-0.0114	0.0553143	0.523	0.5324	FALSE	FALSE	FALSE	ieu-b-5124	15	31877690	0.0672042	NA	0.410463	HPC_noukb	Hypopharyngeal cancer (excl. UKB)	Hypopharyngeal cancer (excl. UKB) || ||	TRUE	igd	NA	NA	NA	NA	NA	NA	NA	15	31877690	0.0017	1.813e-11	718111	BMI_strict	TRUE	reported	HKLPXU	textfile	2	1	TRUE
	rs7206608	C	G	C	G	-0.013	-0.0642969	0.6751	0.682888	FALSE	TRUE	FALSE	ieu-b-5124	16	82872628	0.0723772	NA	0.374348	HPC_noukb	Hypopharyngeal cancer (excl. UKB)	Hypopharyngeal cancer (excl. UKB) || ||	TRUE	igd	NA	NA	NA	NA	NA	NA	NA	16	82872628	0.0018	1.202e-12	717196	BMI_strict	TRUE	reported	HKLPXU	textfile	2	1	TRUE
	rs7206790	C	G	C	G	-0.0606	0.0294482	0.5232	0.532674	FALSE	TRUE	TRUE	ieu-b-5124	16	53797908	0.0681765	NA	0.665783	HPC_noukb	Hypopharyngeal cancer (excl. UKB)	Hypopharyngeal cancer (excl. UKB) || ||	TRUE	igd	NA	NA	NA	NA	NA	NA	NA	16	53797908	0.0017	1e-200	802720	BMI_strict	TRUE	reported	HKLPXU	textfile	2	1	FALSE
	rs7258722	A	T	A	T	-0.02	-0.00197143	0.4131	0.403142	FALSE	TRUE	FALSE	ieu-b-5124	19	18811966	0.0692664	NA	0.977294	HPC_noukb	Hypopharyngeal cancer (excl. UKB)	Hypopharyngeal cancer (excl. UKB) || ||	TRUE	igd	TRUE	rs7258722	rs4808844	A	T	G	A	19	18808915	0.0017	1.806e-30	717923	BMI_strict	TRUE	reported	HKLPXU	textfile	2	1	TRUE
	rs72649373	T	C	T	C	-0.0167	0.0470138	0.8619	0.861801	FALSE	FALSE	FALSE	ieu-b-5124	4	80609966	0.100796	NA	0.64091	HPC_noukb	Hypopharyngeal cancer (excl. UKB)	Hypopharyngeal cancer (excl. UKB) || ||	TRUE	igd	NA	NA	NA	NA	NA	NA	NA	4	80609966	0.0028	3.203e-09	484680	BMI_strict	TRUE	reported	HKLPXU	textfile	2	1	TRUE
	rs72673947	A	G	A	G	-0.0223	0.0617084	0.8902	0.884119	FALSE	FALSE	FALSE	ieu-b-5124	8	118895013	0.107704	NA	0.566681	HPC_noukb	Hypopharyngeal cancer (excl. UKB)	Hypopharyngeal cancer (excl. UKB) || ||	TRUE	igd	TRUE	rs72673947	rs12541851	G	A	T	C	8	118884379	0.0031	4.106e-13	484680	BMI_strict	TRUE	reported	HKLPXU	textfile	2	1	TRUE
	rs72757415	T	G	T	G	-0.0159	0.0831761	0.2123	0.216081	FALSE	FALSE	FALSE	ieu-b-5124	15	92574062	0.0822145	NA	0.311683	HPC_noukb	Hypopharyngeal cancer (excl. UKB)	Hypopharyngeal cancer (excl. UKB) || ||	TRUE	igd	TRUE	rs72757415	rs58431213	T	G	A	G	15	92572762	0.0023	1.337e-11	484680	BMI_strict	TRUE	reported	HKLPXU	textfile	2	1	TRUE
	rs73213484	A	T	A	T	0.0208	0.0233491	0.8565	0.85259	FALSE	TRUE	FALSE	ieu-b-5124	4	28489339	0.0968429	NA	0.809475	HPC_noukb	Hypopharyngeal cancer (excl. UKB)	Hypopharyngeal cancer (excl. UKB) || ||	TRUE	igd	NA	NA	NA	NA	NA	NA	NA	4	28489339	0.0027	2.043e-14	484680	BMI_strict	TRUE	reported	HKLPXU	textfile	2	1	TRUE
	rs7323	C	G	C	G	-0.0166	0.117487	0.268	0.272591	FALSE	TRUE	FALSE	ieu-b-5124	13	28009031	0.074697	NA	0.115753	HPC_noukb	Hypopharyngeal cancer (excl. UKB)	Hypopharyngeal cancer (excl. UKB) || ||	TRUE	igd	NA	NA	NA	NA	NA	NA	NA	13	28009031	0.0019	2.179e-18	718060	BMI_strict	TRUE	reported	HKLPXU	textfile	2	1	TRUE
	rs7357754	A	G	A	G	-0.012	0.0376097	0.4985	0.498976	FALSE	FALSE	FALSE	ieu-b-5124	9	92207308	0.067231	NA	0.575883	HPC_noukb	Hypopharyngeal cancer (excl. UKB)	Hypopharyngeal cancer (excl. UKB) || ||	TRUE	igd	NA	NA	NA	NA	NA	NA	NA	9	92207308	0.0017	1.814e-12	718167	BMI_strict	TRUE	reported	HKLPXU	textfile	2	1	TRUE
	rs73985439	A	C	A	C	-0.0131	-0.0190827	0.6914	0.691706	FALSE	FALSE	FALSE	ieu-b-5124	2	212299249	0.0736146	NA	0.795462	HPC_noukb	Hypopharyngeal cancer (excl. UKB)	Hypopharyngeal cancer (excl. UKB) || ||	TRUE	igd	NA	NA	NA	NA	NA	NA	NA	2	212299249	0.0021	1.839e-10	484680	BMI_strict	TRUE	reported	HKLPXU	textfile	2	1	TRUE
	rs742748	T	C	T	C	-0.0113	-0.0896525	0.5864	0.58575	FALSE	FALSE	FALSE	ieu-b-5124	20	39293397	0.0683939	NA	0.189917	HPC_noukb	Hypopharyngeal cancer (excl. UKB)	Hypopharyngeal cancer (excl. UKB) || ||	TRUE	igd	NA	NA	NA	NA	NA	NA	NA	20	39293397	0.0017	1.13e-11	805145	BMI_strict	TRUE	reported	HKLPXU	textfile	2	1	TRUE
	rs7498665	A	G	A	G	-0.0285	-0.0372167	0.6179	0.598252	FALSE	FALSE	FALSE	ieu-b-5124	16	28883241	0.0693234	NA	0.591367	HPC_noukb	Hypopharyngeal cancer (excl. UKB)	Hypopharyngeal cancer (excl. UKB) || ||	TRUE	igd	NA	NA	NA	NA	NA	NA	NA	16	28883241	0.0017	1.139e-66	804216	BMI_strict	TRUE	reported	HKLPXU	textfile	2	1	TRUE
	rs750090	T	C	T	C	0.0113	-0.0925789	0.6258	0.636677	FALSE	FALSE	FALSE	ieu-b-5124	4	152931436	0.0696023	NA	0.183481	HPC_noukb	Hypopharyngeal cancer (excl. UKB)	Hypopharyngeal cancer (excl. UKB) || ||	TRUE	igd	NA	NA	NA	NA	NA	NA	NA	4	152931436	0.0018	2.496e-10	718676	BMI_strict	TRUE	reported	HKLPXU	textfile	2	1	TRUE
	rs7534091	A	G	A	G	-0.012	-0.00771595	0.7182	0.743707	FALSE	FALSE	FALSE	ieu-b-5124	1	118864616	0.0776792	NA	0.920875	HPC_noukb	Hypopharyngeal cancer (excl. UKB)	Hypopharyngeal cancer (excl. UKB) || ||	TRUE	igd	NA	NA	NA	NA	NA	NA	NA	1	118864616	0.0018	6.65e-11	803017	BMI_strict	TRUE	reported	HKLPXU	textfile	2	1	TRUE
	rs7561278	T	C	T	C	0.0169	-0.136856	0.7668	0.783405	FALSE	FALSE	FALSE	ieu-b-5124	2	48954905	0.0800474	NA	0.0873253	HPC_noukb	Hypopharyngeal cancer (excl. UKB)	Hypopharyngeal cancer (excl. UKB) || ||	TRUE	igd	NA	NA	NA	NA	NA	NA	NA	2	48954905	0.0021	4.89e-16	717019	BMI_strict	TRUE	reported	HKLPXU	textfile	2	1	TRUE
	rs756717	A	G	A	G	-0.0134	0.0624466	0.394	0.398873	FALSE	FALSE	FALSE	ieu-b-5124	16	72996162	0.0702466	NA	0.374023	HPC_noukb	Hypopharyngeal cancer (excl. UKB)	Hypopharyngeal cancer (excl. UKB) || ||	TRUE	igd	NA	NA	NA	NA	NA	NA	NA	16	72996162	0.0017	2.383e-15	804190	BMI_strict	TRUE	reported	HKLPXU	textfile	2	1	TRUE
	rs7568228	C	G	C	G	-0.0104	-0.10108	0.5401	0.505608	FALSE	TRUE	TRUE	ieu-b-5124	2	236848488	0.0690624	NA	0.143303	HPC_noukb	Hypopharyngeal cancer (excl. UKB)	Hypopharyngeal cancer (excl. UKB) || ||	TRUE	igd	NA	NA	NA	NA	NA	NA	NA	2	236848488	0.0017	1.004e-09	712598	BMI_strict	TRUE	reported	HKLPXU	textfile	2	1	FALSE
	rs7588437	A	G	A	G	-0.0165	0.0270484	0.3664	0.359419	FALSE	FALSE	FALSE	ieu-b-5124	2	181575281	0.0700202	NA	0.699278	HPC_noukb	Hypopharyngeal cancer (excl. UKB)	Hypopharyngeal cancer (excl. UKB) || ||	TRUE	igd	NA	NA	NA	NA	NA	NA	NA	2	181575281	0.0017	2.321e-22	806379	BMI_strict	TRUE	reported	HKLPXU	textfile	2	1	TRUE
	rs7593917	A	G	A	G	-0.0115	-0.0289735	0.4535	0.427577	FALSE	FALSE	FALSE	ieu-b-5124	2	203944028	0.0692847	NA	0.675815	HPC_noukb	Hypopharyngeal cancer (excl. UKB)	Hypopharyngeal cancer (excl. UKB) || ||	TRUE	igd	TRUE	rs7593917	rs11690927	A	G	A	G	2	203931012	0.0016	9.671e-13	799252	BMI_strict	TRUE	reported	HKLPXU	textfile	2	1	TRUE
	rs7599312	A	G	A	G	-0.0182	-0.152194	0.2737	0.270048	FALSE	FALSE	FALSE	ieu-b-5124	2	213413231	0.0783458	NA	0.0520643	HPC_noukb	Hypopharyngeal cancer (excl. UKB)	Hypopharyngeal cancer (excl. UKB) || ||	TRUE	igd	NA	NA	NA	NA	NA	NA	NA	2	213413231	0.0018	1.521e-23	806704	BMI_strict	TRUE	reported	HKLPXU	textfile	2	1	TRUE
	rs7616009	A	G	A	G	-0.0157	0.0681345	0.1595	0.148	FALSE	FALSE	FALSE	ieu-b-5124	3	194881756	0.0927079	NA	0.462378	HPC_noukb	Hypopharyngeal cancer (excl. UKB)	Hypopharyngeal cancer (excl. UKB) || ||	TRUE	igd	NA	NA	NA	NA	NA	NA	NA	3	194881756	0.0024	4.331e-11	718569	BMI_strict	TRUE	reported	HKLPXU	textfile	2	1	TRUE
	rs7631156	A	G	A	G	0.0215	-0.0678176	0.3091	0.317554	FALSE	FALSE	FALSE	ieu-b-5124	3	131751628	0.0735553	NA	0.356531	HPC_noukb	Hypopharyngeal cancer (excl. UKB)	Hypopharyngeal cancer (excl. UKB) || ||	TRUE	igd	NA	NA	NA	NA	NA	NA	NA	3	131751628	0.0018	3.329e-32	718695	BMI_strict	TRUE	reported	HKLPXU	textfile	2	1	TRUE
	rs7640424	T	C	T	C	-0.0135	-0.0837532	0.3106	0.300418	FALSE	FALSE	FALSE	ieu-b-5124	3	107820063	0.0745877	NA	0.261488	HPC_noukb	Hypopharyngeal cancer (excl. UKB)	Hypopharyngeal cancer (excl. UKB) || ||	TRUE	igd	NA	NA	NA	NA	NA	NA	NA	3	107820063	0.0018	1.226e-14	805792	BMI_strict	TRUE	reported	HKLPXU	textfile	2	1	TRUE
	rs765875	T	C	T	C	-0.0132	-0.103672	0.4689	0.484327	FALSE	FALSE	FALSE	ieu-b-5124	6	143185683	0.0672613	NA	0.123234	HPC_noukb	Hypopharyngeal cancer (excl. UKB)	Hypopharyngeal cancer (excl. UKB) || ||	TRUE	igd	NA	NA	NA	NA	NA	NA	NA	6	143185683	0.0017	1.077e-14	718653	BMI_strict	TRUE	reported	HKLPXU	textfile	2	1	TRUE
	rs7678054	A	G	A	G	-0.0099	0.0718489	0.4788	0.470614	FALSE	FALSE	FALSE	ieu-b-5124	4	95093855	0.0674069	NA	0.28647	HPC_noukb	Hypopharyngeal cancer (excl. UKB)	Hypopharyngeal cancer (excl. UKB) || ||	TRUE	igd	NA	NA	NA	NA	NA	NA	NA	4	95093855	0.0017	4.574e-09	717910	BMI_strict	TRUE	reported	HKLPXU	textfile	2	1	TRUE
	rs768023	A	G	A	G	0.0161	-0.0707654	0.6033	0.613353	FALSE	FALSE	FALSE	ieu-b-5124	6	108876002	0.0701206	NA	0.312881	HPC_noukb	Hypopharyngeal cancer (excl. UKB)	Hypopharyngeal cancer (excl. UKB) || ||	TRUE	igd	NA	NA	NA	NA	NA	NA	NA	6	108876002	0.0016	1.127e-22	806650	BMI_strict	TRUE	reported	HKLPXU	textfile	2	1	TRUE
	rs76942203	A	G	A	G	0.0263	-0.0506421	0.0587	0.0570079	FALSE	FALSE	FALSE	ieu-b-5124	11	116973247	0.149272	NA	0.734412	HPC_noukb	Hypopharyngeal cancer (excl. UKB)	Hypopharyngeal cancer (excl. UKB) || ||	TRUE	igd	NA	NA	NA	NA	NA	NA	NA	11	116973247	0.0041	9.078e-11	484680	BMI_strict	TRUE	reported	HKLPXU	textfile	2	1	TRUE
	rs7696649	A	G	A	G	0.0116	0.0399107	0.278	0.293006	FALSE	FALSE	FALSE	ieu-b-5124	4	120322177	0.0736173	NA	0.587723	HPC_noukb	Hypopharyngeal cancer (excl. UKB)	Hypopharyngeal cancer (excl. UKB) || ||	TRUE	igd	NA	NA	NA	NA	NA	NA	NA	4	120322177	0.0019	4.725e-10	718653	BMI_strict	TRUE	reported	HKLPXU	textfile	2	1	TRUE
	rs7713317	A	G	A	G	-0.0166	0.0418262	0.7198	0.711045	FALSE	FALSE	FALSE	ieu-b-5124	5	95716722	0.0751171	NA	0.577656	HPC_noukb	Hypopharyngeal cancer (excl. UKB)	Hypopharyngeal cancer (excl. UKB) || ||	TRUE	igd	NA	NA	NA	NA	NA	NA	NA	5	95716722	0.0018	1.959e-20	802425	BMI_strict	TRUE	reported	HKLPXU	textfile	2	1	TRUE
	rs7715256	T	G	T	G	-0.0158	-0.0844151	0.5644	0.575934	FALSE	FALSE	FALSE	ieu-b-5124	5	153537893	0.0680887	NA	0.215057	HPC_noukb	Hypopharyngeal cancer (excl. UKB)	Hypopharyngeal cancer (excl. UKB) || ||	TRUE	igd	NA	NA	NA	NA	NA	NA	NA	5	153537893	0.0016	3.978e-22	806764	BMI_strict	TRUE	reported	HKLPXU	textfile	2	1	TRUE
	rs77165542	T	C	T	C	-0.0939	0.498618	0.0341	0.0346165	FALSE	FALSE	FALSE	ieu-b-5124	2	430975	0.160016	NA	0.00183286	HPC_noukb	Hypopharyngeal cancer (excl. UKB)	Hypopharyngeal cancer (excl. UKB) || ||	TRUE	igd	NA	NA	NA	NA	NA	NA	NA	2	430975	0.0053	1.505e-70	484680	BMI_strict	TRUE	reported	HKLPXU	textfile	2	1	TRUE
	rs7730004	T	C	T	C	0.0139	0.217291	0.6614	0.67389	FALSE	FALSE	FALSE	ieu-b-5124	5	43191033	0.0754027	NA	0.00395485	HPC_noukb	Hypopharyngeal cancer (excl. UKB)	Hypopharyngeal cancer (excl. UKB) || ||	TRUE	igd	NA	NA	NA	NA	NA	NA	NA	5	43191033	0.0018	1.461e-14	718548	BMI_strict	TRUE	reported	HKLPXU	textfile	2	1	TRUE
	rs7734385	A	G	A	G	-0.0101	-0.0719411	0.4449	0.424657	FALSE	FALSE	FALSE	ieu-b-5124	5	158460212	0.0685236	NA	0.293776	HPC_noukb	Hypopharyngeal cancer (excl. UKB)	Hypopharyngeal cancer (excl. UKB) || ||	TRUE	igd	NA	NA	NA	NA	NA	NA	NA	5	158460212	0.0016	6.084e-10	805693	BMI_strict	TRUE	reported	HKLPXU	textfile	2	1	TRUE
	rs77432547	A	G	A	G	-0.017	-0.00466207	0.7229	0.725743	FALSE	FALSE	FALSE	ieu-b-5124	13	86494817	0.0751976	NA	0.950565	HPC_noukb	Hypopharyngeal cancer (excl. UKB)	Hypopharyngeal cancer (excl. UKB) || ||	TRUE	igd	NA	NA	NA	NA	NA	NA	NA	13	86494817	0.0021	1.44e-15	484680	BMI_strict	TRUE	reported	HKLPXU	textfile	2	1	TRUE
	rs7774	A	C	A	C	0.0128	-0.00275659	0.3197	0.322143	FALSE	FALSE	FALSE	ieu-b-5124	17	4801887	0.0725756	NA	0.969702	HPC_noukb	Hypopharyngeal cancer (excl. UKB)	Hypopharyngeal cancer (excl. UKB) || ||	TRUE	igd	TRUE	rs7774	rs12936083	A	C	G	A	17	4801163	0.0021	4.223e-10	484680	BMI_strict	TRUE	reported	HKLPXU	textfile	2	1	TRUE
	rs7802342	T	G	T	G	-0.0124	0.0607021	0.7048	0.71515	FALSE	FALSE	FALSE	ieu-b-5124	7	137435925	0.0766955	NA	0.42867	HPC_noukb	Hypopharyngeal cancer (excl. UKB)	Hypopharyngeal cancer (excl. UKB) || ||	TRUE	igd	NA	NA	NA	NA	NA	NA	NA	7	137435925	0.0019	6.233e-11	712979	BMI_strict	TRUE	reported	HKLPXU	textfile	2	1	TRUE
	rs7893571	T	G	T	G	0.0125	-0.036517	0.6736	0.656596	FALSE	FALSE	FALSE	ieu-b-5124	10	16750129	0.0727416	NA	0.615662	HPC_noukb	Hypopharyngeal cancer (excl. UKB)	Hypopharyngeal cancer (excl. UKB) || ||	TRUE	igd	NA	NA	NA	NA	NA	NA	NA	10	16750129	0.0018	5.832e-12	718186	BMI_strict	TRUE	reported	HKLPXU	textfile	2	1	TRUE
	rs7899106	A	G	A	G	-0.0327	-0.00479964	0.9496	0.952998	FALSE	FALSE	FALSE	ieu-b-5124	10	87410904	0.157628	NA	0.975709	HPC_noukb	Hypopharyngeal cancer (excl. UKB)	Hypopharyngeal cancer (excl. UKB) || ||	TRUE	igd	NA	NA	NA	NA	NA	NA	NA	10	87410904	0.0037	1.719e-18	806450	BMI_strict	TRUE	reported	HKLPXU	textfile	2	1	TRUE
	rs7903146	T	C	T	C	-0.0178	-0.0430415	0.2787	0.289211	FALSE	FALSE	FALSE	ieu-b-5124	10	114758349	0.0746328	NA	0.564136	HPC_noukb	Hypopharyngeal cancer (excl. UKB)	Hypopharyngeal cancer (excl. UKB) || ||	TRUE	igd	NA	NA	NA	NA	NA	NA	NA	10	114758349	0.0018	1.665e-23	806810	BMI_strict	TRUE	reported	HKLPXU	textfile	2	1	TRUE
	rs79186842	A	G	A	G	0.0202	-0.220977	0.8597	0.854302	FALSE	FALSE	FALSE	ieu-b-5124	20	47689036	0.0880902	NA	0.0121233	HPC_noukb	Hypopharyngeal cancer (excl. UKB)	Hypopharyngeal cancer (excl. UKB) || ||	TRUE	igd	NA	NA	NA	NA	NA	NA	NA	20	47689036	0.0028	2.596e-13	484680	BMI_strict	TRUE	reported	HKLPXU	textfile	2	1	TRUE
	rs7944782	T	G	T	G	-0.0144	0.00385935	0.5016	0.494794	FALSE	FALSE	FALSE	ieu-b-5124	11	130795698	0.0681765	NA	0.954857	HPC_noukb	Hypopharyngeal cancer (excl. UKB)	Hypopharyngeal cancer (excl. UKB) || ||	TRUE	igd	NA	NA	NA	NA	NA	NA	NA	11	130795698	0.0017	3.61e-17	718230	BMI_strict	TRUE	reported	HKLPXU	textfile	2	1	TRUE
	rs7975187	A	G	A	G	-0.0137	0.0784515	0.7712	0.79654	FALSE	FALSE	FALSE	ieu-b-5124	12	60964108	0.084913	NA	0.355536	HPC_noukb	Hypopharyngeal cancer (excl. UKB)	Hypopharyngeal cancer (excl. UKB) || ||	TRUE	igd	NA	NA	NA	NA	NA	NA	NA	12	60964108	0.0021	3.86e-11	718606	BMI_strict	TRUE	reported	HKLPXU	textfile	2	1	TRUE
	rs79780963	T	C	T	C	0.0244	-0.199831	0.0804	0.0804676	FALSE	FALSE	FALSE	ieu-b-5124	10	104952499	0.131788	NA	0.129442	HPC_noukb	Hypopharyngeal cancer (excl. UKB)	Hypopharyngeal cancer (excl. UKB) || ||	TRUE	igd	NA	NA	NA	NA	NA	NA	NA	10	104952499	0.0035	2.632e-12	484680	BMI_strict	TRUE	reported	HKLPXU	textfile	2	1	TRUE
	rs79906980	T	C	T	C	0.0158	0.00168802	0.1555	0.154806	FALSE	FALSE	FALSE	ieu-b-5124	1	57887985	0.0946078	NA	0.985765	HPC_noukb	Hypopharyngeal cancer (excl. UKB)	Hypopharyngeal cancer (excl. UKB) || ||	TRUE	igd	NA	NA	NA	NA	NA	NA	NA	1	57887985	0.0026	1.691e-09	484680	BMI_strict	TRUE	reported	HKLPXU	textfile	2	1	TRUE
	rs8065172	A	G	A	G	-0.0124	0.135394	0.2383	0.2439	FALSE	FALSE	FALSE	ieu-b-5124	17	31456969	0.0769954	NA	0.0786683	HPC_noukb	Hypopharyngeal cancer (excl. UKB)	Hypopharyngeal cancer (excl. UKB) || ||	TRUE	igd	NA	NA	NA	NA	NA	NA	NA	17	31456969	0.002	5.291e-10	718308	BMI_strict	TRUE	reported	HKLPXU	textfile	2	1	TRUE
	rs8097672	A	T	A	T	-0.0209	-0.0400139	0.8545	0.851379	FALSE	TRUE	FALSE	ieu-b-5124	18	1839601	0.0934477	NA	0.668509	HPC_noukb	Hypopharyngeal cancer (excl. UKB)	Hypopharyngeal cancer (excl. UKB) || ||	TRUE	igd	NA	NA	NA	NA	NA	NA	NA	18	1839601	0.0024	3.26e-18	718627	BMI_strict	TRUE	reported	HKLPXU	textfile	2	1	TRUE
	rs8122855	A	G	A	G	0.0137	0.0403863	0.3377	0.332997	FALSE	FALSE	FALSE	ieu-b-5124	20	25192049	0.0710625	NA	0.569816	HPC_noukb	Hypopharyngeal cancer (excl. UKB)	Hypopharyngeal cancer (excl. UKB) || ||	TRUE	igd	NA	NA	NA	NA	NA	NA	NA	20	25192049	0.0018	4.108e-14	717822	BMI_strict	TRUE	reported	HKLPXU	textfile	2	1	TRUE
	rs8134638	T	C	T	C	-0.0133	-0.00422003	0.6273	0.620214	FALSE	FALSE	FALSE	ieu-b-5124	21	40644170	0.0701267	NA	0.952014	HPC_noukb	Hypopharyngeal cancer (excl. UKB)	Hypopharyngeal cancer (excl. UKB) || ||	TRUE	igd	NA	NA	NA	NA	NA	NA	NA	21	40644170	0.002	1.574e-11	484680	BMI_strict	TRUE	reported	HKLPXU	textfile	2	1	TRUE
	rs8181823	A	C	A	C	-0.0125	-0.126632	0.2344	0.236775	FALSE	FALSE	FALSE	ieu-b-5124	13	65477940	0.0823334	NA	0.12404	HPC_noukb	Hypopharyngeal cancer (excl. UKB)	Hypopharyngeal cancer (excl. UKB) || ||	TRUE	igd	NA	NA	NA	NA	NA	NA	NA	13	65477940	0.002	4.363e-10	718253	BMI_strict	TRUE	reported	HKLPXU	textfile	2	1	TRUE
	rs845084	A	G	A	G	0.0136	-0.0363886	0.2666	0.265944	FALSE	FALSE	FALSE	ieu-b-5124	10	125220036	0.0772675	NA	0.637682	HPC_noukb	Hypopharyngeal cancer (excl. UKB)	Hypopharyngeal cancer (excl. UKB) || ||	TRUE	igd	NA	NA	NA	NA	NA	NA	NA	10	125220036	0.0019	3.219e-12	718056	BMI_strict	TRUE	reported	HKLPXU	textfile	2	1	TRUE
	rs852056	T	C	T	C	0.0123	0.0380493	0.2538	0.241271	FALSE	FALSE	FALSE	ieu-b-5124	20	17102860	0.077562	NA	0.623733	HPC_noukb	Hypopharyngeal cancer (excl. UKB)	Hypopharyngeal cancer (excl. UKB) || ||	TRUE	igd	NA	NA	NA	NA	NA	NA	NA	20	17102860	0.0019	2.145e-10	718527	BMI_strict	TRUE	reported	HKLPXU	textfile	2	1	TRUE
	rs865809	A	G	A	G	0.0124	0.00911083	0.2246	0.236066	FALSE	FALSE	FALSE	ieu-b-5124	3	183997735	0.0803585	NA	0.909731	HPC_noukb	Hypopharyngeal cancer (excl. UKB)	Hypopharyngeal cancer (excl. UKB) || ||	TRUE	igd	NA	NA	NA	NA	NA	NA	NA	3	183997735	0.002	6.502e-10	718234	BMI_strict	TRUE	reported	HKLPXU	textfile	2	1	TRUE
	rs879620	T	C	T	C	0.0226	0.0706188	0.5966	0.609698	FALSE	FALSE	FALSE	ieu-b-5124	16	4015729	0.0701262	NA	0.313923	HPC_noukb	Hypopharyngeal cancer (excl. UKB)	Hypopharyngeal cancer (excl. UKB) || ||	TRUE	igd	NA	NA	NA	NA	NA	NA	NA	16	4015729	0.0017	8.449e-39	718515	BMI_strict	TRUE	reported	HKLPXU	textfile	2	1	TRUE
	rs889398	T	C	T	C	-0.0195	0.0458883	0.4151	0.414331	FALSE	FALSE	FALSE	ieu-b-5124	16	69556715	0.0681414	NA	0.500675	HPC_noukb	Hypopharyngeal cancer (excl. UKB)	Hypopharyngeal cancer (excl. UKB) || ||	TRUE	igd	NA	NA	NA	NA	NA	NA	NA	16	69556715	0.0016	3.234e-32	806620	BMI_strict	TRUE	reported	HKLPXU	textfile	2	1	TRUE
	rs891387	T	C	T	C	0.0208	-0.0317701	0.4951	0.515791	FALSE	FALSE	FALSE	ieu-b-5124	18	21103909	0.0676377	NA	0.638563	HPC_noukb	Hypopharyngeal cancer (excl. UKB)	Hypopharyngeal cancer (excl. UKB) || ||	TRUE	igd	NA	NA	NA	NA	NA	NA	NA	18	21103909	0.0017	9.256e-35	718548	BMI_strict	TRUE	reported	HKLPXU	textfile	2	1	TRUE
	rs895330	C	G	C	G	0.0196	-0.0710517	0.806	0.811819	FALSE	TRUE	FALSE	ieu-b-5124	19	4060707	0.0870352	NA	0.414297	HPC_noukb	Hypopharyngeal cancer (excl. UKB)	Hypopharyngeal cancer (excl. UKB) || ||	TRUE	igd	NA	NA	NA	NA	NA	NA	NA	19	4060707	0.0022	1.588e-19	712588	BMI_strict	TRUE	reported	HKLPXU	textfile	2	1	TRUE
	rs900144	T	C	T	C	0.0148	-0.00076171	0.5784	0.564622	FALSE	FALSE	FALSE	ieu-b-5124	11	13294268	0.0674746	NA	0.990993	HPC_noukb	Hypopharyngeal cancer (excl. UKB)	Hypopharyngeal cancer (excl. UKB) || ||	TRUE	igd	NA	NA	NA	NA	NA	NA	NA	11	13294268	0.0017	1.526e-18	718416	BMI_strict	TRUE	reported	HKLPXU	textfile	2	1	TRUE
	rs9168	A	C	A	C	-0.0139	0.00925355	0.2752	0.295769	FALSE	FALSE	FALSE	ieu-b-5124	13	99101583	0.0747802	NA	0.901518	HPC_noukb	Hypopharyngeal cancer (excl. UKB)	Hypopharyngeal cancer (excl. UKB) || ||	TRUE	igd	NA	NA	NA	NA	NA	NA	NA	13	99101583	0.0019	1.075e-13	718514	BMI_strict	TRUE	reported	HKLPXU	textfile	2	1	TRUE
	rs925018	C	G	C	G	-0.013	0.0359443	0.6665	0.681959	FALSE	TRUE	FALSE	ieu-b-5124	3	62713143	0.0728587	NA	0.62177	HPC_noukb	Hypopharyngeal cancer (excl. UKB)	Hypopharyngeal cancer (excl. UKB) || ||	TRUE	igd	NA	NA	NA	NA	NA	NA	NA	3	62713143	0.0017	4.328e-14	806677	BMI_strict	TRUE	reported	HKLPXU	textfile	2	1	TRUE
	rs9294260	A	G	A	G	0.014	-0.165189	0.4689	0.472837	FALSE	FALSE	FALSE	ieu-b-5124	6	83433228	0.0687392	NA	0.0162555	HPC_noukb	Hypopharyngeal cancer (excl. UKB)	Hypopharyngeal cancer (excl. UKB) || ||	TRUE	igd	NA	NA	NA	NA	NA	NA	NA	6	83433228	0.0016	8.161e-18	806412	BMI_strict	TRUE	reported	HKLPXU	textfile	2	1	TRUE
	rs9299	T	C	T	C	0.0119	0.0707803	0.6447	0.658459	FALSE	FALSE	FALSE	ieu-b-5124	17	46669430	0.0715285	NA	0.322399	HPC_noukb	Hypopharyngeal cancer (excl. UKB)	Hypopharyngeal cancer (excl. UKB) || ||	TRUE	igd	NA	NA	NA	NA	NA	NA	NA	17	46669430	0.0018	1.869e-11	718669	BMI_strict	TRUE	reported	HKLPXU	textfile	2	1	TRUE
	rs930295	A	C	A	C	0.0208	-0.0474407	0.1548	0.169467	FALSE	FALSE	FALSE	ieu-b-5124	2	50233352	0.0929698	NA	0.609856	HPC_noukb	Hypopharyngeal cancer (excl. UKB)	Hypopharyngeal cancer (excl. UKB) || ||	TRUE	igd	NA	NA	NA	NA	NA	NA	NA	2	50233352	0.0023	2.03e-19	716913	BMI_strict	TRUE	reported	HKLPXU	textfile	2	1	TRUE
	rs9304665	A	T	A	T	0.023	-0.0486674	0.7423	0.726323	FALSE	TRUE	FALSE	ieu-b-5124	19	47602577	0.0819669	NA	0.552683	HPC_noukb	Hypopharyngeal cancer (excl. UKB)	Hypopharyngeal cancer (excl. UKB) || ||	TRUE	igd	NA	NA	NA	NA	NA	NA	NA	19	47602577	0.002	2.203e-31	717324	BMI_strict	TRUE	reported	HKLPXU	textfile	2	1	TRUE
	rs9320823	T	C	T	C	-0.0165	-0.123169	0.4118	0.389277	FALSE	FALSE	FALSE	ieu-b-5124	6	98429337	0.0700696	NA	0.0787807	HPC_noukb	Hypopharyngeal cancer (excl. UKB)	Hypopharyngeal cancer (excl. UKB) || ||	TRUE	igd	NA	NA	NA	NA	NA	NA	NA	6	98429337	0.0017	2.073e-21	718696	BMI_strict	TRUE	reported	HKLPXU	textfile	2	1	TRUE
	rs935166	A	G	A	G	-0.0152	-0.0732701	0.4948	0.504092	FALSE	FALSE	FALSE	ieu-b-5124	2	26949366	0.0679367	NA	0.280808	HPC_noukb	Hypopharyngeal cancer (excl. UKB)	Hypopharyngeal cancer (excl. UKB) || ||	TRUE	igd	NA	NA	NA	NA	NA	NA	NA	2	26949366	0.0019	8.691e-16	484680	BMI_strict	TRUE	reported	HKLPXU	textfile	2	1	TRUE
	rs942066	A	G	A	G	-0.0202	-0.0834839	0.373	0.371956	FALSE	FALSE	FALSE	ieu-b-5124	14	94031914	0.071219	NA	0.241111	HPC_noukb	Hypopharyngeal cancer (excl. UKB)	Hypopharyngeal cancer (excl. UKB) || ||	TRUE	igd	NA	NA	NA	NA	NA	NA	NA	14	94031914	0.002	2.356e-24	484680	BMI_strict	TRUE	reported	HKLPXU	textfile	2	1	TRUE
	rs946824	T	C	T	C	0.0197	-0.0244331	0.1355	0.146099	FALSE	FALSE	FALSE	ieu-b-5124	1	243684019	0.0990176	NA	0.805098	HPC_noukb	Hypopharyngeal cancer (excl. UKB)	Hypopharyngeal cancer (excl. UKB) || ||	TRUE	igd	NA	NA	NA	NA	NA	NA	NA	1	243684019	0.0025	4.823e-15	717750	BMI_strict	TRUE	reported	HKLPXU	textfile	2	1	TRUE
	rs9478496	T	C	T	C	-0.0157	0.181132	0.8453	0.834628	FALSE	FALSE	FALSE	ieu-b-5124	6	154333183	0.0953884	NA	0.0575785	HPC_noukb	Hypopharyngeal cancer (excl. UKB)	Hypopharyngeal cancer (excl. UKB) || ||	TRUE	igd	NA	NA	NA	NA	NA	NA	NA	6	154333183	0.0023	8.169e-12	718366	BMI_strict	TRUE	reported	HKLPXU	textfile	2	1	TRUE
	rs9522183	T	G	T	G	-0.0135	0.0415542	0.5492	0.544876	FALSE	FALSE	FALSE	ieu-b-5124	13	111977280	0.0681823	NA	0.542221	HPC_noukb	Hypopharyngeal cancer (excl. UKB)	Hypopharyngeal cancer (excl. UKB) || ||	TRUE	igd	NA	NA	NA	NA	NA	NA	NA	13	111977280	0.0019	2.1e-12	484680	BMI_strict	TRUE	reported	HKLPXU	textfile	2	1	TRUE
	rs9527895	T	C	T	C	-0.0158	0.0720205	0.819	0.837062	FALSE	FALSE	FALSE	ieu-b-5124	13	59367767	0.0925783	NA	0.436603	HPC_noukb	Hypopharyngeal cancer (excl. UKB)	Hypopharyngeal cancer (excl. UKB) || ||	TRUE	igd	NA	NA	NA	NA	NA	NA	NA	13	59367767	0.0023	3.693e-12	718497	BMI_strict	TRUE	reported	HKLPXU	textfile	2	1	TRUE
	rs9531786	C	G	C	G	-0.0111	-0.147634	0.3715	0.357993	FALSE	TRUE	FALSE	ieu-b-5124	13	85983968	0.0724434	NA	0.0415576	HPC_noukb	Hypopharyngeal cancer (excl. UKB)	Hypopharyngeal cancer (excl. UKB) || ||	TRUE	igd	NA	NA	NA	NA	NA	NA	NA	13	85983968	0.0018	4.111e-10	714692	BMI_strict	TRUE	reported	HKLPXU	textfile	2	1	TRUE
	rs9569777	T	G	T	G	-0.0201	0.0908286	0.1865	0.170386	FALSE	FALSE	FALSE	ieu-b-5124	13	58510376	0.0883982	NA	0.304188	HPC_noukb	Hypopharyngeal cancer (excl. UKB)	Hypopharyngeal cancer (excl. UKB) || ||	TRUE	igd	TRUE	rs9569777	rs9569780	T	G	A	G	13	58484786	0.0021	3.43e-21	806752	BMI_strict	TRUE	reported	HKLPXU	textfile	2	1	TRUE
	rs9595908	T	C	T	C	0.0154	0.137689	0.6427	0.629477	FALSE	FALSE	FALSE	ieu-b-5124	13	33184288	0.0703056	NA	0.0501788	HPC_noukb	Hypopharyngeal cancer (excl. UKB)	Hypopharyngeal cancer (excl. UKB) || ||	TRUE	igd	NA	NA	NA	NA	NA	NA	NA	13	33184288	0.0017	3.734e-20	806589	BMI_strict	TRUE	reported	HKLPXU	textfile	2	1	TRUE
	rs9599161	T	C	T	C	0.0098	-0.00657059	0.57	0.580461	FALSE	FALSE	FALSE	ieu-b-5124	13	67434016	0.0689738	NA	0.924107	HPC_noukb	Hypopharyngeal cancer (excl. UKB)	Hypopharyngeal cancer (excl. UKB) || ||	TRUE	igd	NA	NA	NA	NA	NA	NA	NA	13	67434016	0.0016	2.324e-09	806768	BMI_strict	TRUE	reported	HKLPXU	textfile	2	1	TRUE
	rs9603697	T	C	T	C	0.0134	-0.0707818	0.3184	0.324524	FALSE	FALSE	FALSE	ieu-b-5124	13	40783323	0.0717718	NA	0.324032	HPC_noukb	Hypopharyngeal cancer (excl. UKB)	Hypopharyngeal cancer (excl. UKB) || ||	TRUE	igd	NA	NA	NA	NA	NA	NA	NA	13	40783323	0.0018	1.689e-13	718556	BMI_strict	TRUE	reported	HKLPXU	textfile	2	1	TRUE
	rs962796	T	C	T	C	0.014	0.0942809	0.1937	0.203307	FALSE	FALSE	FALSE	ieu-b-5124	13	54385284	0.0798162	NA	0.237514	HPC_noukb	Hypopharyngeal cancer (excl. UKB)	Hypopharyngeal cancer (excl. UKB) || ||	TRUE	igd	NA	NA	NA	NA	NA	NA	NA	13	54385284	0.0021	1.88e-11	718667	BMI_strict	TRUE	reported	HKLPXU	textfile	2	1	TRUE
	rs9816226	A	T	A	T	-0.0315	0.0920274	0.1755	0.185801	FALSE	TRUE	FALSE	ieu-b-5124	3	185834499	0.0861811	NA	0.285594	HPC_noukb	Hypopharyngeal cancer (excl. UKB)	Hypopharyngeal cancer (excl. UKB) || ||	TRUE	igd	NA	NA	NA	NA	NA	NA	NA	3	185834499	0.0021	1.447e-50	794122	BMI_strict	TRUE	reported	HKLPXU	textfile	2	1	TRUE
	rs9818122	T	C	T	C	-0.0228	0.0775116	0.7933	0.802793	FALSE	FALSE	FALSE	ieu-b-5124	3	85868671	0.0855374	NA	0.364845	HPC_noukb	Hypopharyngeal cancer (excl. UKB)	Hypopharyngeal cancer (excl. UKB) || ||	TRUE	igd	TRUE	rs9818122	rs17355368	C	T	A	G	3	85861064	0.002	3.966e-30	806655	BMI_strict	TRUE	reported	HKLPXU	textfile	2	1	TRUE
	rs9826775	A	G	A	G	0.0155	0.0733373	0.8513	0.852668	FALSE	FALSE	FALSE	ieu-b-5124	3	156295341	0.0979714	NA	0.454124	HPC_noukb	Hypopharyngeal cancer (excl. UKB)	Hypopharyngeal cancer (excl. UKB) || ||	TRUE	igd	NA	NA	NA	NA	NA	NA	NA	3	156295341	0.0024	6.614e-11	715852	BMI_strict	TRUE	reported	HKLPXU	textfile	2	1	TRUE
	rs9827823	T	C	T	C	0.0182	-0.0672675	0.8552	0.846483	FALSE	FALSE	FALSE	ieu-b-5124	3	84221774	0.0913375	NA	0.461444	HPC_noukb	Hypopharyngeal cancer (excl. UKB)	Hypopharyngeal cancer (excl. UKB) || ||	TRUE	igd	NA	NA	NA	NA	NA	NA	NA	3	84221774	0.0023	3.39e-15	718678	BMI_strict	TRUE	reported	HKLPXU	textfile	2	1	TRUE
	rs9888533	T	C	T	C	0.0125	0.000206552	0.5302	0.53596	FALSE	FALSE	FALSE	ieu-b-5124	13	107854612	0.069543	NA	0.99763	HPC_noukb	Hypopharyngeal cancer (excl. UKB)	Hypopharyngeal cancer (excl. UKB) || ||	TRUE	igd	NA	NA	NA	NA	NA	NA	NA	13	107854612	0.0019	1.378e-10	484680	BMI_strict	TRUE	reported	HKLPXU	textfile	2	1	TRUE
	rs9926784	T	C	T	C	0.0237	-0.0966553	0.8007	0.817965	FALSE	FALSE	FALSE	ieu-b-5124	16	19941968	0.0846162	NA	0.253338	HPC_noukb	Hypopharyngeal cancer (excl. UKB)	Hypopharyngeal cancer (excl. UKB) || ||	TRUE	igd	NA	NA	NA	NA	NA	NA	NA	16	19941968	0.0021	1.084e-30	800954	BMI_strict	TRUE	reported	HKLPXU	textfile	2	1	TRUE
	rs9944219	A	G	A	G	-0.0119	-0.00640072	0.6044	0.609581	FALSE	FALSE	FALSE	ieu-b-5124	15	46500612	0.0695964	NA	0.926722	HPC_noukb	Hypopharyngeal cancer (excl. UKB)	Hypopharyngeal cancer (excl. UKB) || ||	TRUE	igd	NA	NA	NA	NA	NA	NA	NA	15	46500612	0.0017	8.137e-13	806243	BMI_strict	TRUE	reported	HKLPXU	textfile	2	1	TRUE
	rs994596	T	C	T	C	0.013	0.0757515	0.3247	0.322344	FALSE	FALSE	FALSE	ieu-b-5124	4	18459828	0.0718707	NA	0.291884	HPC_noukb	Hypopharyngeal cancer (excl. UKB)	Hypopharyngeal cancer (excl. UKB) || ||	TRUE	igd	NA	NA	NA	NA	NA	NA	NA	4	18459828	0.0018	1.055e-12	718470	BMI_strict	TRUE	reported	HKLPXU	textfile	2	1	TRUE
	rs9951619	T	G	T	G	-0.0152	0.113586	0.2239	0.232454	FALSE	FALSE	FALSE	ieu-b-5124	18	56882326	0.078156	NA	0.146135	HPC_noukb	Hypopharyngeal cancer (excl. UKB)	Hypopharyngeal cancer (excl. UKB) || ||	TRUE	igd	NA	NA	NA	NA	NA	NA	NA	18	56882326	0.0019	2.332e-15	794609	BMI_strict	TRUE	reported	HKLPXU	textfile	2	1	TRUE
BMI-LA	rs10002111	A	G	A	G	0.0125	0.0363121	0.2227	0.232379	FALSE	FALSE	FALSE	ieu-b-5125	4	67815504	0.0398277	NA	0.361911	LA_noukb	Laryngeal cancer (excl. UKB)	Laryngeal cancer (excl. UKB) || ||	TRUE	igd	NA	NA	NA	NA	NA	NA	NA	4	67815504	0.0021	1.257e-09	718668	BMI_strict	TRUE	reported	HKLPXU	textfile	2	1	TRUE
	rs10033843	A	G	A	G	0.014	-0.0186052	0.215	0.20695	FALSE	FALSE	FALSE	ieu-b-5125	4	77028783	0.0419513	NA	0.657408	LA_noukb	Laryngeal cancer (excl. UKB)	Laryngeal cancer (excl. UKB) || ||	TRUE	igd	NA	NA	NA	NA	NA	NA	NA	4	77028783	0.0021	1.073e-11	714618	BMI_strict	TRUE	reported	HKLPXU	textfile	2	1	TRUE
	rs10050620	T	C	T	C	-0.013	0.0093261	0.3308	0.326044	FALSE	FALSE	FALSE	ieu-b-5125	5	63927239	0.0365835	NA	0.79878	LA_noukb	Laryngeal cancer (excl. UKB)	Laryngeal cancer (excl. UKB) || ||	TRUE	igd	NA	NA	NA	NA	NA	NA	NA	5	63927239	0.002	1.198e-10	484680	BMI_strict	TRUE	reported	HKLPXU	textfile	2	1	TRUE
	rs1006317	T	G	T	G	0.016	0.0452132	0.1268	0.129484	FALSE	FALSE	FALSE	ieu-b-5125	1	209552636	0.0503991	NA	0.369664	LA_noukb	Laryngeal cancer (excl. UKB)	Laryngeal cancer (excl. UKB) || ||	TRUE	igd	NA	NA	NA	NA	NA	NA	NA	1	209552636	0.0026	3.749e-10	717508	BMI_strict	TRUE	reported	HKLPXU	textfile	2	1	TRUE
	rs10099330	A	G	A	G	-0.0119	-0.0518711	0.538	0.561671	FALSE	FALSE	FALSE	ieu-b-5125	8	143383694	0.0344038	NA	0.131627	LA_noukb	Laryngeal cancer (excl. UKB)	Laryngeal cancer (excl. UKB) || ||	TRUE	igd	NA	NA	NA	NA	NA	NA	NA	8	143383694	0.0017	3.218e-12	714811	BMI_strict	TRUE	reported	HKLPXU	textfile	2	1	TRUE
	rs10101364	T	C	T	C	0.012	0.00829835	0.6801	0.683042	FALSE	FALSE	FALSE	ieu-b-5125	8	20634888	0.0368013	NA	0.821598	LA_noukb	Laryngeal cancer (excl. UKB)	Laryngeal cancer (excl. UKB) || ||	TRUE	igd	NA	NA	NA	NA	NA	NA	NA	8	20634888	0.0018	5.607e-11	711583	BMI_strict	TRUE	reported	HKLPXU	textfile	2	1	TRUE
	rs10121187	C	G	C	G	0.0102	0.0417234	0.509	0.520129	FALSE	TRUE	TRUE	ieu-b-5125	9	29737191	0.0340009	NA	0.219775	LA_noukb	Laryngeal cancer (excl. UKB)	Laryngeal cancer (excl. UKB) || ||	TRUE	igd	NA	NA	NA	NA	NA	NA	NA	9	29737191	0.0017	2.016e-09	718682	BMI_strict	TRUE	reported	HKLPXU	textfile	2	1	FALSE
	rs10132280	A	C	A	C	-0.0214	0.0513782	0.311	0.295401	FALSE	FALSE	FALSE	ieu-b-5125	14	25928179	0.036995	NA	0.164897	LA_noukb	Laryngeal cancer (excl. UKB)	Laryngeal cancer (excl. UKB) || ||	TRUE	igd	NA	NA	NA	NA	NA	NA	NA	14	25928179	0.0018	2.283e-33	806477	BMI_strict	TRUE	reported	HKLPXU	textfile	2	1	TRUE
	rs10145749	T	C	T	C	0.0161	0.0187738	0.1549	0.143622	FALSE	FALSE	FALSE	ieu-b-5125	14	102782109	0.0479279	NA	0.695274	LA_noukb	Laryngeal cancer (excl. UKB)	Laryngeal cancer (excl. UKB) || ||	TRUE	igd	NA	NA	NA	NA	NA	NA	NA	14	102782109	0.0026	8.325e-10	484680	BMI_strict	TRUE	reported	HKLPXU	textfile	2	1	TRUE
	rs10168563	A	G	A	G	0.0126	0.087979	0.7031	0.702246	FALSE	FALSE	FALSE	ieu-b-5125	2	35558345	0.0379389	NA	0.0203972	LA_noukb	Laryngeal cancer (excl. UKB)	Laryngeal cancer (excl. UKB) || ||	TRUE	igd	TRUE	rs10168563	rs7579183	G	A	A	G	2	35552173	0.0018	9.334e-12	718585	BMI_strict	TRUE	reported	HKLPXU	textfile	2	1	TRUE
	rs10169594	T	C	T	C	-0.012	-0.0566179	0.6475	0.635002	FALSE	FALSE	FALSE	ieu-b-5125	2	41637688	0.0352368	NA	0.108102	LA_noukb	Laryngeal cancer (excl. UKB)	Laryngeal cancer (excl. UKB) || ||	TRUE	igd	NA	NA	NA	NA	NA	NA	NA	2	41637688	0.0018	1.338e-11	718035	BMI_strict	TRUE	reported	HKLPXU	textfile	2	1	TRUE
	rs10182181	A	G	A	G	-0.0327	-0.0139646	0.5052	0.523037	FALSE	FALSE	FALSE	ieu-b-5125	2	25150296	0.0339904	NA	0.68119	LA_noukb	Laryngeal cancer (excl. UKB)	Laryngeal cancer (excl. UKB) || ||	TRUE	igd	NA	NA	NA	NA	NA	NA	NA	2	25150296	0.0016	2.45e-91	806439	BMI_strict	TRUE	reported	HKLPXU	textfile	2	1	TRUE
	rs10185199	A	G	A	G	-0.0143	-0.0356441	0.286	0.280637	FALSE	FALSE	FALSE	ieu-b-5125	2	40282202	0.0391122	NA	0.362121	LA_noukb	Laryngeal cancer (excl. UKB)	Laryngeal cancer (excl. UKB) || ||	TRUE	igd	NA	NA	NA	NA	NA	NA	NA	2	40282202	0.002	3.178e-13	706553	BMI_strict	TRUE	reported	HKLPXU	textfile	2	1	TRUE
	rs10197031	T	C	T	C	-0.0161	-0.0596595	0.7262	0.717794	FALSE	FALSE	FALSE	ieu-b-5125	2	105454590	0.0378243	NA	0.114731	LA_noukb	Laryngeal cancer (excl. UKB)	Laryngeal cancer (excl. UKB) || ||	TRUE	igd	NA	NA	NA	NA	NA	NA	NA	2	105454590	0.0019	5.047e-18	718456	BMI_strict	TRUE	reported	HKLPXU	textfile	2	1	TRUE
	rs10261050	T	C	T	C	0.0113	0.027703	0.4754	0.460925	FALSE	FALSE	FALSE	ieu-b-5125	7	114337652	0.034419	NA	0.420891	LA_noukb	Laryngeal cancer (excl. UKB)	Laryngeal cancer (excl. UKB) || ||	TRUE	igd	NA	NA	NA	NA	NA	NA	NA	7	114337652	0.0017	4.533e-11	718350	BMI_strict	TRUE	reported	HKLPXU	textfile	2	1	TRUE
	rs10499694	A	G	A	G	0.013	-0.0507681	0.4935	0.485383	FALSE	FALSE	FALSE	ieu-b-5125	7	50614173	0.0344517	NA	0.140588	LA_noukb	Laryngeal cancer (excl. UKB)	Laryngeal cancer (excl. UKB) || ||	TRUE	igd	NA	NA	NA	NA	NA	NA	NA	7	50614173	0.0016	1.285e-15	806696	BMI_strict	TRUE	reported	HKLPXU	textfile	2	1	TRUE
	rs10506971	A	G	A	G	-0.0142	0.0127231	0.5521	0.541383	FALSE	FALSE	FALSE	ieu-b-5125	12	89757937	0.0346744	NA	0.713669	LA_noukb	Laryngeal cancer (excl. UKB)	Laryngeal cancer (excl. UKB) || ||	TRUE	igd	NA	NA	NA	NA	NA	NA	NA	12	89757937	0.0017	4.686e-17	717231	BMI_strict	TRUE	reported	HKLPXU	textfile	2	1	TRUE
	rs10510419	T	G	T	G	-0.0168	-0.0570892	0.1467	0.144246	FALSE	FALSE	FALSE	ieu-b-5125	3	12426936	0.0488319	NA	0.242364	LA_noukb	Laryngeal cancer (excl. UKB)	Laryngeal cancer (excl. UKB) || ||	TRUE	igd	NA	NA	NA	NA	NA	NA	NA	3	12426936	0.0023	2.233e-13	800535	BMI_strict	TRUE	reported	HKLPXU	textfile	2	1	TRUE
	rs10518694	A	C	A	C	0.0144	0.0280845	0.1394	0.141045	FALSE	FALSE	FALSE	ieu-b-5125	15	53072673	0.048778	NA	0.564776	LA_noukb	Laryngeal cancer (excl. UKB)	Laryngeal cancer (excl. UKB) || ||	TRUE	igd	NA	NA	NA	NA	NA	NA	NA	15	53072673	0.0024	3.431e-09	718281	BMI_strict	TRUE	reported	HKLPXU	textfile	2	1	TRUE
	rs10733682	A	G	A	G	0.0148	0.0497778	0.4594	0.488133	FALSE	FALSE	FALSE	ieu-b-5125	9	129460914	0.0346829	NA	0.151222	LA_noukb	Laryngeal cancer (excl. UKB)	Laryngeal cancer (excl. UKB) || ||	TRUE	igd	NA	NA	NA	NA	NA	NA	NA	9	129460914	0.0016	1.755e-19	805407	BMI_strict	TRUE	reported	HKLPXU	textfile	2	1	TRUE
	rs10741329	A	G	A	G	0.0115	0.0596138	0.6944	0.68233	FALSE	FALSE	FALSE	ieu-b-5125	11	89997796	0.0370921	NA	0.108014	LA_noukb	Laryngeal cancer (excl. UKB)	Laryngeal cancer (excl. UKB) || ||	TRUE	igd	NA	NA	NA	NA	NA	NA	NA	11	89997796	0.0018	3.914e-10	718412	BMI_strict	TRUE	reported	HKLPXU	textfile	2	1	TRUE
	rs10742752	T	C	T	C	-0.0123	-0.0147531	0.3761	0.394576	FALSE	FALSE	FALSE	ieu-b-5125	11	45438374	0.0348015	NA	0.671622	LA_noukb	Laryngeal cancer (excl. UKB)	Laryngeal cancer (excl. UKB) || ||	TRUE	igd	NA	NA	NA	NA	NA	NA	NA	11	45438374	0.0017	1.203e-13	806700	BMI_strict	TRUE	reported	HKLPXU	textfile	2	1	TRUE
	rs1075901	T	C	T	C	-0.0118	0.0149543	0.4516	0.446293	FALSE	FALSE	FALSE	ieu-b-5125	17	15943910	0.034376	NA	0.663547	LA_noukb	Laryngeal cancer (excl. UKB)	Laryngeal cancer (excl. UKB) || ||	TRUE	igd	NA	NA	NA	NA	NA	NA	NA	17	15943910	0.0016	4.431e-13	806810	BMI_strict	TRUE	reported	HKLPXU	textfile	2	1	TRUE
	rs10761785	T	G	T	G	-0.0133	-0.0030656	0.5136	0.516015	FALSE	FALSE	FALSE	ieu-b-5125	10	65321147	0.0340461	NA	0.928253	LA_noukb	Laryngeal cancer (excl. UKB)	Laryngeal cancer (excl. UKB) || ||	TRUE	igd	TRUE	rs10761785	rs12245149	G	T	A	C	10	65318766	0.0016	3.467e-16	806365	BMI_strict	TRUE	reported	HKLPXU	textfile	2	1	TRUE
	rs10772983	T	C	T	C	-0.01	0.0714784	0.5394	0.514193	FALSE	FALSE	FALSE	ieu-b-5125	12	17141582	0.0342404	NA	0.0368383	LA_noukb	Laryngeal cancer (excl. UKB)	Laryngeal cancer (excl. UKB) || ||	TRUE	igd	NA	NA	NA	NA	NA	NA	NA	12	17141582	0.0016	6.209e-10	804927	BMI_strict	TRUE	reported	HKLPXU	textfile	2	1	TRUE
	rs10779751	A	G	A	G	0.0131	-0.00260302	0.2787	0.287773	FALSE	FALSE	FALSE	ieu-b-5125	1	11284336	0.0391663	NA	0.947011	LA_noukb	Laryngeal cancer (excl. UKB)	Laryngeal cancer (excl. UKB) || ||	TRUE	igd	NA	NA	NA	NA	NA	NA	NA	1	11284336	0.0018	2.657e-13	806531	BMI_strict	TRUE	reported	HKLPXU	textfile	2	1	TRUE
	rs10788494	C	G	C	G	0.0132	-0.01168	0.4835	0.495254	FALSE	TRUE	TRUE	ieu-b-5125	10	88110925	0.0340102	NA	0.731279	LA_noukb	Laryngeal cancer (excl. UKB)	Laryngeal cancer (excl. UKB) || ||	TRUE	igd	NA	NA	NA	NA	NA	NA	NA	10	88110925	0.0017	5.507e-15	718328	BMI_strict	TRUE	reported	HKLPXU	textfile	2	1	FALSE
	rs10829164	T	C	T	C	0.0151	-0.00828261	0.1468	0.141749	FALSE	FALSE	FALSE	ieu-b-5125	10	27318370	0.0488872	NA	0.865464	LA_noukb	Laryngeal cancer (excl. UKB)	Laryngeal cancer (excl. UKB) || ||	TRUE	igd	NA	NA	NA	NA	NA	NA	NA	10	27318370	0.0024	2.365e-10	718703	BMI_strict	TRUE	reported	HKLPXU	textfile	2	1	TRUE
	rs10842240	C	G	C	G	0.0195	-0.0421556	0.1256	0.131865	FALSE	TRUE	FALSE	ieu-b-5125	12	24068456	0.0501196	NA	0.400292	LA_noukb	Laryngeal cancer (excl. UKB)	Laryngeal cancer (excl. UKB) || ||	TRUE	igd	TRUE	rs10842240	rs7298352	C	G	G	C	12	24060075	0.0025	1.211e-14	718478	BMI_strict	TRUE	reported	HKLPXU	textfile	2	1	TRUE
	rs10858334	C	G	C	G	-0.0148	0.114708	0.8484	0.860521	FALSE	TRUE	FALSE	ieu-b-5125	9	137989785	0.0503005	NA	0.0225803	LA_noukb	Laryngeal cancer (excl. UKB)	Laryngeal cancer (excl. UKB) || ||	TRUE	igd	NA	NA	NA	NA	NA	NA	NA	9	137989785	0.0025	4.914e-09	707975	BMI_strict	TRUE	reported	HKLPXU	textfile	2	1	TRUE
	rs10909880	T	C	T	C	-0.0135	-0.00944965	0.4522	0.450376	FALSE	FALSE	FALSE	ieu-b-5125	1	2727804	0.0345195	NA	0.784278	LA_noukb	Laryngeal cancer (excl. UKB)	Laryngeal cancer (excl. UKB) || ||	TRUE	igd	NA	NA	NA	NA	NA	NA	NA	1	2727804	0.0016	2.205e-16	775594	BMI_strict	TRUE	reported	HKLPXU	textfile	2	1	TRUE
	rs10920336	A	G	A	G	-0.0101	0.0189617	0.5327	0.508016	FALSE	FALSE	FALSE	ieu-b-5125	1	202115945	0.0344251	NA	0.581762	LA_noukb	Laryngeal cancer (excl. UKB)	Laryngeal cancer (excl. UKB) || ||	TRUE	igd	NA	NA	NA	NA	NA	NA	NA	1	202115945	0.0017	4.197e-09	704432	BMI_strict	TRUE	reported	HKLPXU	textfile	2	1	TRUE
	rs10920678	A	G	A	G	0.0149	0.0455895	0.425	0.429654	FALSE	FALSE	FALSE	ieu-b-5125	1	190239907	0.0342716	NA	0.183439	LA_noukb	Laryngeal cancer (excl. UKB)	Laryngeal cancer (excl. UKB) || ||	TRUE	igd	NA	NA	NA	NA	NA	NA	NA	1	190239907	0.0016	7.148e-20	805921	BMI_strict	TRUE	reported	HKLPXU	textfile	2	1	TRUE
	rs10929925	A	C	A	C	-0.0142	-0.0599199	0.4105	0.431283	FALSE	FALSE	FALSE	ieu-b-5125	2	6155557	0.0347524	NA	0.084674	LA_noukb	Laryngeal cancer (excl. UKB)	Laryngeal cancer (excl. UKB) || ||	TRUE	igd	NA	NA	NA	NA	NA	NA	NA	2	6155557	0.0016	3.045e-18	801209	BMI_strict	TRUE	reported	HKLPXU	textfile	2	1	TRUE
	rs10938397	A	G	A	G	-0.0322	-0.0271073	0.57	0.568085	FALSE	FALSE	FALSE	ieu-b-5125	4	45182527	0.0345775	NA	0.433066	LA_noukb	Laryngeal cancer (excl. UKB)	Laryngeal cancer (excl. UKB) || ||	TRUE	igd	NA	NA	NA	NA	NA	NA	NA	4	45182527	0.0016	2.42e-86	805635	BMI_strict	TRUE	reported	HKLPXU	textfile	2	1	TRUE
	rs10942267	A	G	A	G	0.0148	-0.0542963	0.6927	0.691462	FALSE	FALSE	FALSE	ieu-b-5125	5	80841914	0.0365528	NA	0.137432	LA_noukb	Laryngeal cancer (excl. UKB)	Laryngeal cancer (excl. UKB) || ||	TRUE	igd	NA	NA	NA	NA	NA	NA	NA	5	80841914	0.0018	6.532e-16	718640	BMI_strict	TRUE	reported	HKLPXU	textfile	2	1	TRUE
	rs10962550	C	G	C	G	0.0186	0.0440791	0.1756	0.186043	FALSE	TRUE	FALSE	ieu-b-5125	9	16720329	0.0440831	NA	0.317355	LA_noukb	Laryngeal cancer (excl. UKB)	Laryngeal cancer (excl. UKB) || ||	TRUE	igd	NA	NA	NA	NA	NA	NA	NA	9	16720329	0.0022	5.675e-17	718060	BMI_strict	TRUE	reported	HKLPXU	textfile	2	1	TRUE
	rs10968114	A	C	A	C	0.0113	-0.00503619	0.5331	0.529483	FALSE	FALSE	FALSE	ieu-b-5125	9	27800007	0.0343383	NA	0.883397	LA_noukb	Laryngeal cancer (excl. UKB)	Laryngeal cancer (excl. UKB) || ||	TRUE	igd	NA	NA	NA	NA	NA	NA	NA	9	27800007	0.0017	3.302e-11	718364	BMI_strict	TRUE	reported	HKLPXU	textfile	2	1	TRUE
	rs10975933	C	G	C	G	0.0114	0.0454938	0.6634	0.685532	FALSE	TRUE	FALSE	ieu-b-5125	9	6962574	0.0370101	NA	0.218987	LA_noukb	Laryngeal cancer (excl. UKB)	Laryngeal cancer (excl. UKB) || ||	TRUE	igd	TRUE	rs10975933	rs10815490	G	C	C	T	9	6954557	0.0018	2.065e-10	718391	BMI_strict	TRUE	reported	HKLPXU	textfile	2	1	TRUE
	rs10992867	A	G	A	G	0.0162	0.0404283	0.2687	0.260602	FALSE	FALSE	FALSE	ieu-b-5125	9	96461013	0.0385207	NA	0.293938	LA_noukb	Laryngeal cancer (excl. UKB)	Laryngeal cancer (excl. UKB) || ||	TRUE	igd	NA	NA	NA	NA	NA	NA	NA	9	96461013	0.0019	3.195e-17	718610	BMI_strict	TRUE	reported	HKLPXU	textfile	2	1	TRUE
	rs11030618	T	C	T	C	0.011	-0.0399642	0.5786	0.555431	FALSE	FALSE	FALSE	ieu-b-5125	11	29243293	0.0343048	NA	0.24403	LA_noukb	Laryngeal cancer (excl. UKB)	Laryngeal cancer (excl. UKB) || ||	TRUE	igd	NA	NA	NA	NA	NA	NA	NA	11	29243293	0.0017	1.673e-10	718309	BMI_strict	TRUE	reported	HKLPXU	textfile	2	1	TRUE
	rs11044430	A	T	A	T	0.0161	0.115613	0.844	0.851189	FALSE	TRUE	FALSE	ieu-b-5125	12	19287416	0.049692	NA	0.0199876	LA_noukb	Laryngeal cancer (excl. UKB)	Laryngeal cancer (excl. UKB) || ||	TRUE	igd	NA	NA	NA	NA	NA	NA	NA	12	19287416	0.0023	3.765e-12	718664	BMI_strict	TRUE	reported	HKLPXU	textfile	2	1	TRUE
	rs11066188	A	G	A	G	-0.0114	-0.0897417	0.3762	0.409236	FALSE	FALSE	FALSE	ieu-b-5125	12	112610714	0.0350549	NA	0.0104662	LA_noukb	Laryngeal cancer (excl. UKB)	Laryngeal cancer (excl. UKB) || ||	TRUE	igd	NA	NA	NA	NA	NA	NA	NA	12	112610714	0.0016	3.053e-12	805492	BMI_strict	TRUE	reported	HKLPXU	textfile	2	1	TRUE
	rs11078883	C	G	C	G	-0.0126	-0.0652379	0.654	0.659015	FALSE	TRUE	FALSE	ieu-b-5125	17	2138828	0.0363756	NA	0.0729004	LA_noukb	Laryngeal cancer (excl. UKB)	Laryngeal cancer (excl. UKB) || ||	TRUE	igd	NA	NA	NA	NA	NA	NA	NA	17	2138828	0.0018	1.299e-12	718501	BMI_strict	TRUE	reported	HKLPXU	textfile	2	1	TRUE
	rs11105839	A	T	A	T	-0.0113	-0.0219661	0.3729	0.374827	FALSE	TRUE	FALSE	ieu-b-5125	12	91237920	0.0353435	NA	0.534268	LA_noukb	Laryngeal cancer (excl. UKB)	Laryngeal cancer (excl. UKB) || ||	TRUE	igd	NA	NA	NA	NA	NA	NA	NA	12	91237920	0.0017	1.248e-11	801313	BMI_strict	TRUE	reported	HKLPXU	textfile	2	1	TRUE
	rs11115176	T	C	T	C	0.0131	0.0475327	0.7839	0.76286	FALSE	FALSE	FALSE	ieu-b-5125	12	82465797	0.0400241	NA	0.23499	LA_noukb	Laryngeal cancer (excl. UKB)	Laryngeal cancer (excl. UKB) || ||	TRUE	igd	NA	NA	NA	NA	NA	NA	NA	12	82465797	0.0019	6.793e-12	805743	BMI_strict	TRUE	reported	HKLPXU	textfile	2	1	TRUE
	rs11121210	T	C	T	C	-0.0111	0.00977151	0.3445	0.368676	FALSE	FALSE	FALSE	ieu-b-5125	1	8708529	0.0353265	NA	0.782083	LA_noukb	Laryngeal cancer (excl. UKB)	Laryngeal cancer (excl. UKB) || ||	TRUE	igd	NA	NA	NA	NA	NA	NA	NA	1	8708529	0.0017	2.365e-10	718632	BMI_strict	TRUE	reported	HKLPXU	textfile	2	1	TRUE
	rs11128021	A	G	A	G	-0.0181	-0.0803164	0.1615	0.144836	FALSE	FALSE	FALSE	ieu-b-5125	3	88139016	0.0490495	NA	0.101535	LA_noukb	Laryngeal cancer (excl. UKB)	Laryngeal cancer (excl. UKB) || ||	TRUE	igd	NA	NA	NA	NA	NA	NA	NA	3	88139016	0.0024	1.634e-14	718699	BMI_strict	TRUE	reported	HKLPXU	textfile	2	1	TRUE
	rs11150911	A	C	A	C	0.0118	-0.032779	0.2848	0.292954	FALSE	FALSE	FALSE	ieu-b-5125	18	73498528	0.0379536	NA	0.387775	LA_noukb	Laryngeal cancer (excl. UKB)	Laryngeal cancer (excl. UKB) || ||	TRUE	igd	NA	NA	NA	NA	NA	NA	NA	18	73498528	0.0018	3.718e-11	802197	BMI_strict	TRUE	reported	HKLPXU	textfile	2	1	TRUE
	rs11165643	T	C	T	C	0.0185	-0.0508454	0.5796	0.58532	FALSE	FALSE	FALSE	ieu-b-5125	1	96924097	0.0346176	NA	0.141894	LA_noukb	Laryngeal cancer (excl. UKB)	Laryngeal cancer (excl. UKB) || ||	TRUE	igd	NA	NA	NA	NA	NA	NA	NA	1	96924097	0.0016	4.493e-30	805410	BMI_strict	TRUE	reported	HKLPXU	textfile	2	1	TRUE
	rs11170468	A	C	A	C	0.013	0.0236956	0.7826	0.76649	FALSE	FALSE	FALSE	ieu-b-5125	12	39430048	0.0401723	NA	0.555291	LA_noukb	Laryngeal cancer (excl. UKB)	Laryngeal cancer (excl. UKB) || ||	TRUE	igd	NA	NA	NA	NA	NA	NA	NA	12	39430048	0.0019	1.124e-11	806636	BMI_strict	TRUE	reported	HKLPXU	textfile	2	1	TRUE
	rs11218510	A	G	A	G	-0.014	0.0491592	0.3949	0.397859	FALSE	FALSE	FALSE	ieu-b-5125	11	121922587	0.0346005	NA	0.155385	LA_noukb	Laryngeal cancer (excl. UKB)	Laryngeal cancer (excl. UKB) || ||	TRUE	igd	NA	NA	NA	NA	NA	NA	NA	11	121922587	0.002	6.788e-13	484680	BMI_strict	TRUE	reported	HKLPXU	textfile	2	1	TRUE
	rs112646560	T	C	T	C	0.018	-0.0548283	0.2119	0.218961	FALSE	FALSE	FALSE	ieu-b-5125	1	39560250	0.0416098	NA	0.187612	LA_noukb	Laryngeal cancer (excl. UKB)	Laryngeal cancer (excl. UKB) || ||	TRUE	igd	NA	NA	NA	NA	NA	NA	NA	1	39560250	0.0023	1.29e-14	484680	BMI_strict	TRUE	reported	HKLPXU	textfile	2	1	TRUE
	rs1126930	C	G	C	G	0.0341	-0.060565	0.0339	0.0339922	FALSE	TRUE	FALSE	ieu-b-5125	12	49399132	0.0995265	NA	0.542835	LA_noukb	Laryngeal cancer (excl. UKB)	Laryngeal cancer (excl. UKB) || ||	TRUE	igd	NA	NA	NA	NA	NA	NA	NA	12	49399132	0.0053	1.004e-10	484680	BMI_strict	TRUE	reported	HKLPXU	textfile	2	1	TRUE
	rs11525873	T	C	T	C	0.0232	-0.00354313	0.8995	0.905164	FALSE	FALSE	FALSE	ieu-b-5125	7	138817193	0.0587834	NA	0.951937	LA_noukb	Laryngeal cancer (excl. UKB)	Laryngeal cancer (excl. UKB) || ||	TRUE	igd	NA	NA	NA	NA	NA	NA	NA	7	138817193	0.0032	2.977e-13	484680	BMI_strict	TRUE	reported	HKLPXU	textfile	2	1	TRUE
	rs11538	A	G	A	G	-0.0138	-0.0515969	0.8284	0.821935	FALSE	FALSE	FALSE	ieu-b-5125	22	18220831	0.0443034	NA	0.24417	LA_noukb	Laryngeal cancer (excl. UKB)	Laryngeal cancer (excl. UKB) || ||	TRUE	igd	NA	NA	NA	NA	NA	NA	NA	22	18220831	0.0023	1.094e-09	718441	BMI_strict	TRUE	reported	HKLPXU	textfile	2	1	TRUE
	rs11577094	T	C	T	C	0.0186	-0.0375184	0.0791	0.0820695	FALSE	FALSE	FALSE	ieu-b-5125	1	38026600	0.0631499	NA	0.552435	LA_noukb	Laryngeal cancer (excl. UKB)	Laryngeal cancer (excl. UKB) || ||	TRUE	igd	NA	NA	NA	NA	NA	NA	NA	1	38026600	0.003	3.275e-10	791496	BMI_strict	TRUE	reported	HKLPXU	textfile	2	1	TRUE
	rs1159692	A	C	A	C	0.0135	-0.0476217	0.4752	0.498475	FALSE	FALSE	FALSE	ieu-b-5125	5	63977815	0.0341894	NA	0.163656	LA_noukb	Laryngeal cancer (excl. UKB)	Laryngeal cancer (excl. UKB) || ||	TRUE	igd	NA	NA	NA	NA	NA	NA	NA	5	63977815	0.0017	5.543e-15	717639	BMI_strict	TRUE	reported	HKLPXU	textfile	2	1	TRUE
	rs11611246	T	G	T	G	0.0223	0.116572	0.199	0.213356	FALSE	FALSE	FALSE	ieu-b-5125	12	939480	0.0417619	NA	0.00524892	LA_noukb	Laryngeal cancer (excl. UKB)	Laryngeal cancer (excl. UKB) || ||	TRUE	igd	NA	NA	NA	NA	NA	NA	NA	12	939480	0.002	2.037e-28	793063	BMI_strict	TRUE	reported	HKLPXU	textfile	2	1	TRUE
	rs11614340	T	C	T	C	-0.0117	-0.0864663	0.7066	0.68999	FALSE	FALSE	FALSE	ieu-b-5125	12	133448391	0.0364564	NA	0.0177027	LA_noukb	Laryngeal cancer (excl. UKB)	Laryngeal cancer (excl. UKB) || ||	TRUE	igd	TRUE	rs11614340	rs77936594	C	T	A	G	12	133426483	0.0018	1.87e-10	718698	BMI_strict	TRUE	reported	HKLPXU	textfile	2	1	TRUE
	rs11615578	T	C	T	C	0.0117	0.0417842	0.2575	0.247616	FALSE	FALSE	FALSE	ieu-b-5125	12	121714935	0.0392773	NA	0.287408	LA_noukb	Laryngeal cancer (excl. UKB)	Laryngeal cancer (excl. UKB) || ||	TRUE	igd	NA	NA	NA	NA	NA	NA	NA	12	121714935	0.002	3.036e-09	704912	BMI_strict	TRUE	reported	HKLPXU	textfile	2	1	TRUE
	rs11633626	A	C	A	C	-0.0157	0.00809772	0.6313	0.624175	FALSE	FALSE	FALSE	ieu-b-5125	15	95271378	0.0356646	NA	0.820383	LA_noukb	Laryngeal cancer (excl. UKB)	Laryngeal cancer (excl. UKB) || ||	TRUE	igd	NA	NA	NA	NA	NA	NA	NA	15	95271378	0.0018	7.272e-19	718669	BMI_strict	TRUE	reported	HKLPXU	textfile	2	1	TRUE
	rs11636611	T	C	T	C	0.0104	0.0235005	0.4981	0.494834	FALSE	FALSE	FALSE	ieu-b-5125	15	36391965	0.0343906	NA	0.49439	LA_noukb	Laryngeal cancer (excl. UKB)	Laryngeal cancer (excl. UKB) || ||	TRUE	igd	NA	NA	NA	NA	NA	NA	NA	15	36391965	0.0017	8.853e-10	718657	BMI_strict	TRUE	reported	HKLPXU	textfile	2	1	TRUE
	rs116374395	A	G	A	G	0.0321	0.109919	0.0348	0.0355358	FALSE	FALSE	FALSE	ieu-b-5125	5	50723410	0.0895731	NA	0.21977	LA_noukb	Laryngeal cancer (excl. UKB)	Laryngeal cancer (excl. UKB) || ||	TRUE	igd	NA	NA	NA	NA	NA	NA	NA	5	50723410	0.0052	7.047e-10	484680	BMI_strict	TRUE	reported	HKLPXU	textfile	2	1	TRUE
	rs11649864	A	G	A	G	0.0192	0.0261549	0.0859	0.0851161	FALSE	FALSE	FALSE	ieu-b-5125	17	56093061	0.0602627	NA	0.664278	LA_noukb	Laryngeal cancer (excl. UKB)	Laryngeal cancer (excl. UKB) || ||	TRUE	igd	NA	NA	NA	NA	NA	NA	NA	17	56093061	0.003	2.524e-10	690306	BMI_strict	TRUE	reported	HKLPXU	textfile	2	1	TRUE
	rs11655587	T	C	T	C	-0.021	0.0360089	0.3572	0.352953	FALSE	FALSE	FALSE	ieu-b-5125	17	47140794	0.0357662	NA	0.314038	LA_noukb	Laryngeal cancer (excl. UKB)	Laryngeal cancer (excl. UKB) || ||	TRUE	igd	NA	NA	NA	NA	NA	NA	NA	17	47140794	0.002	6.874e-26	484680	BMI_strict	TRUE	reported	HKLPXU	textfile	2	1	TRUE
	rs11672660	T	C	T	C	-0.0338	-0.0229245	0.1871	0.204761	FALSE	FALSE	FALSE	ieu-b-5125	19	46180184	0.042529	NA	0.589866	LA_noukb	Laryngeal cancer (excl. UKB)	Laryngeal cancer (excl. UKB) || ||	TRUE	igd	NA	NA	NA	NA	NA	NA	NA	19	46180184	0.0021	6.831e-60	781854	BMI_strict	TRUE	reported	HKLPXU	textfile	2	1	TRUE
	rs11692326	T	C	T	C	0.0147	0.0500029	0.2302	0.231465	FALSE	FALSE	FALSE	ieu-b-5125	2	208263279	0.0397456	NA	0.208365	LA_noukb	Laryngeal cancer (excl. UKB)	Laryngeal cancer (excl. UKB) || ||	TRUE	igd	NA	NA	NA	NA	NA	NA	NA	2	208263279	0.0019	1.685e-14	801583	BMI_strict	TRUE	reported	HKLPXU	textfile	2	1	TRUE
	rs11695013	T	C	T	C	-0.0104	-0.0354492	0.632	0.639374	FALSE	FALSE	FALSE	ieu-b-5125	2	157057487	0.0356415	NA	0.319928	LA_noukb	Laryngeal cancer (excl. UKB)	Laryngeal cancer (excl. UKB) || ||	TRUE	igd	NA	NA	NA	NA	NA	NA	NA	2	157057487	0.0017	2.427e-09	718650	BMI_strict	TRUE	reported	HKLPXU	textfile	2	1	TRUE
	rs11713193	A	G	A	G	0.0246	0.066663	0.5156	0.519565	FALSE	FALSE	FALSE	ieu-b-5125	3	49924424	0.0338104	NA	0.0486474	LA_noukb	Laryngeal cancer (excl. UKB)	Laryngeal cancer (excl. UKB) || ||	TRUE	igd	NA	NA	NA	NA	NA	NA	NA	3	49924424	0.0017	3.02e-48	718286	BMI_strict	TRUE	reported	HKLPXU	textfile	2	1	TRUE
	rs11739877	T	C	T	C	0.0116	-0.0270309	0.6231	0.613742	FALSE	FALSE	FALSE	ieu-b-5125	5	105876806	0.0348932	NA	0.438532	LA_noukb	Laryngeal cancer (excl. UKB)	Laryngeal cancer (excl. UKB) || ||	TRUE	igd	NA	NA	NA	NA	NA	NA	NA	5	105876806	0.0018	4.006e-11	718632	BMI_strict	TRUE	reported	HKLPXU	textfile	2	1	TRUE
	rs11757278	T	C	T	C	0.0133	0.0247432	0.6961	0.690605	FALSE	FALSE	FALSE	ieu-b-5125	6	13180454	0.0371102	NA	0.504933	LA_noukb	Laryngeal cancer (excl. UKB)	Laryngeal cancer (excl. UKB) || ||	TRUE	igd	NA	NA	NA	NA	NA	NA	NA	6	13180454	0.0019	6.916e-13	718346	BMI_strict	TRUE	reported	HKLPXU	textfile	2	1	TRUE
	rs11772246	T	C	T	C	0.0145	0.0175038	0.8234	0.816078	FALSE	FALSE	FALSE	ieu-b-5125	7	71603692	0.0441227	NA	0.691583	LA_noukb	Laryngeal cancer (excl. UKB)	Laryngeal cancer (excl. UKB) || ||	TRUE	igd	NA	NA	NA	NA	NA	NA	NA	7	71603692	0.0022	3.689e-11	718345	BMI_strict	TRUE	reported	HKLPXU	textfile	2	1	TRUE
	rs11782074	T	G	T	G	0.0124	0.0331023	0.3675	0.378062	FALSE	FALSE	FALSE	ieu-b-5125	8	142617096	0.0362585	NA	0.361268	LA_noukb	Laryngeal cancer (excl. UKB)	Laryngeal cancer (excl. UKB) || ||	TRUE	igd	NA	NA	NA	NA	NA	NA	NA	8	142617096	0.0018	4.238e-12	717837	BMI_strict	TRUE	reported	HKLPXU	textfile	2	1	TRUE
	rs118081010	T	C	T	C	0.0518	-0.0637596	0.0165	0.0140026	FALSE	FALSE	FALSE	ieu-b-5125	11	46174948	0.150021	NA	0.670834	LA_noukb	Laryngeal cancer (excl. UKB)	Laryngeal cancer (excl. UKB) || ||	TRUE	igd	NA	NA	NA	NA	NA	NA	NA	11	46174948	0.0075	5.277e-12	484680	BMI_strict	TRUE	reported	HKLPXU	textfile	2	1	TRUE
	rs11882409	A	C	A	C	0.0121	-0.00456975	0.303	0.286537	FALSE	FALSE	FALSE	ieu-b-5125	19	34019685	0.0382239	NA	0.904838	LA_noukb	Laryngeal cancer (excl. UKB)	Laryngeal cancer (excl. UKB) || ||	TRUE	igd	NA	NA	NA	NA	NA	NA	NA	19	34019685	0.0019	3.309e-10	718526	BMI_strict	TRUE	reported	HKLPXU	textfile	2	1	TRUE
	rs11902450	T	C	T	C	0.0167	0.0321176	0.1052	0.10443	FALSE	FALSE	FALSE	ieu-b-5125	2	12845368	0.055026	NA	0.559435	LA_noukb	Laryngeal cancer (excl. UKB)	Laryngeal cancer (excl. UKB) || ||	TRUE	igd	NA	NA	NA	NA	NA	NA	NA	2	12845368	0.0027	1.061e-09	718624	BMI_strict	TRUE	reported	HKLPXU	textfile	2	1	TRUE
	rs11915371	A	C	A	C	-0.0154	0.0631342	0.8019	0.793883	FALSE	FALSE	FALSE	ieu-b-5125	3	70539559	0.042867	NA	0.140807	LA_noukb	Laryngeal cancer (excl. UKB)	Laryngeal cancer (excl. UKB) || ||	TRUE	igd	NA	NA	NA	NA	NA	NA	NA	3	70539559	0.0021	2.288e-13	718311	BMI_strict	TRUE	reported	HKLPXU	textfile	2	1	TRUE
	rs11921432	T	C	T	C	-0.0189	0.0166778	0.8906	0.888616	FALSE	FALSE	FALSE	ieu-b-5125	3	35117776	0.0543619	NA	0.759	LA_noukb	Laryngeal cancer (excl. UKB)	Laryngeal cancer (excl. UKB) || ||	TRUE	igd	NA	NA	NA	NA	NA	NA	NA	3	35117776	0.0027	5.382e-12	706646	BMI_strict	TRUE	reported	HKLPXU	textfile	2	1	TRUE
	rs12072739	A	G	A	G	-0.0169	-0.0689763	0.7762	0.775059	FALSE	FALSE	FALSE	ieu-b-5125	1	98315893	0.0404256	NA	0.087961	LA_noukb	Laryngeal cancer (excl. UKB)	Laryngeal cancer (excl. UKB) || ||	TRUE	igd	NA	NA	NA	NA	NA	NA	NA	1	98315893	0.0023	1.502e-13	484680	BMI_strict	TRUE	reported	HKLPXU	textfile	2	1	TRUE
	rs12098284	T	C	T	C	0.0184	-0.0642726	0.1212	0.126827	FALSE	FALSE	FALSE	ieu-b-5125	10	76047464	0.0520019	NA	0.216472	LA_noukb	Laryngeal cancer (excl. UKB)	Laryngeal cancer (excl. UKB) || ||	TRUE	igd	NA	NA	NA	NA	NA	NA	NA	10	76047464	0.0026	9.868e-13	714745	BMI_strict	TRUE	reported	HKLPXU	textfile	2	1	TRUE
	rs12140153	T	G	T	G	-0.0353	-0.0123017	0.0911	0.0949243	FALSE	FALSE	FALSE	ieu-b-5125	1	62579891	0.0585346	NA	0.833542	LA_noukb	Laryngeal cancer (excl. UKB)	Laryngeal cancer (excl. UKB) || ||	TRUE	igd	NA	NA	NA	NA	NA	NA	NA	1	62579891	0.0034	1.443e-25	484680	BMI_strict	TRUE	reported	HKLPXU	textfile	2	1	TRUE
	rs12150665	T	C	T	C	0.0168	0.0387286	0.5931	0.593164	FALSE	FALSE	FALSE	ieu-b-5125	17	34914787	0.0351922	NA	0.271118	LA_noukb	Laryngeal cancer (excl. UKB)	Laryngeal cancer (excl. UKB) || ||	TRUE	igd	NA	NA	NA	NA	NA	NA	NA	17	34914787	0.0016	1.737e-24	806685	BMI_strict	TRUE	reported	HKLPXU	textfile	2	1	TRUE
	rs12259464	A	G	A	G	0.0109	-0.0348445	0.4811	0.476709	FALSE	FALSE	FALSE	ieu-b-5125	10	53680099	0.0342849	NA	0.309476	LA_noukb	Laryngeal cancer (excl. UKB)	Laryngeal cancer (excl. UKB) || ||	TRUE	igd	NA	NA	NA	NA	NA	NA	NA	10	53680099	0.0017	1.478e-10	716686	BMI_strict	TRUE	reported	HKLPXU	textfile	2	1	TRUE
	rs12282785	A	C	A	C	-0.0157	-0.0127985	0.2204	0.218628	FALSE	FALSE	FALSE	ieu-b-5125	11	76476030	0.0414863	NA	0.757703	LA_noukb	Laryngeal cancer (excl. UKB)	Laryngeal cancer (excl. UKB) || ||	TRUE	igd	NA	NA	NA	NA	NA	NA	NA	11	76476030	0.0023	1.434e-11	484680	BMI_strict	TRUE	reported	HKLPXU	textfile	2	1	TRUE
	rs12286929	A	G	A	G	-0.0177	-0.0996148	0.5007	0.466208	FALSE	FALSE	FALSE	ieu-b-5125	11	115022404	0.0341025	NA	0.00348859	LA_noukb	Laryngeal cancer (excl. UKB)	Laryngeal cancer (excl. UKB) || ||	TRUE	igd	NA	NA	NA	NA	NA	NA	NA	11	115022404	0.0016	1.925e-27	806583	BMI_strict	TRUE	reported	HKLPXU	textfile	2	1	TRUE
	rs12334877	A	G	A	G	-0.0144	0.0623514	0.1913	0.199226	FALSE	FALSE	FALSE	ieu-b-5125	8	67194171	0.0429039	NA	0.146146	LA_noukb	Laryngeal cancer (excl. UKB)	Laryngeal cancer (excl. UKB) || ||	TRUE	igd	NA	NA	NA	NA	NA	NA	NA	8	67194171	0.0021	2.173e-11	717934	BMI_strict	TRUE	reported	HKLPXU	textfile	2	1	TRUE
	rs12364470	T	G	T	G	-0.0187	-0.0659344	0.8535	0.834737	FALSE	FALSE	FALSE	ieu-b-5125	11	134601012	0.0456833	NA	0.148938	LA_noukb	Laryngeal cancer (excl. UKB)	Laryngeal cancer (excl. UKB) || ||	TRUE	igd	NA	NA	NA	NA	NA	NA	NA	11	134601012	0.0022	2.18e-17	799515	BMI_strict	TRUE	reported	HKLPXU	textfile	2	1	TRUE
	rs12369179	T	C	T	C	-0.034	0.0796174	0.085	0.0947324	FALSE	FALSE	FALSE	ieu-b-5125	12	122963550	0.0580335	NA	0.170088	LA_noukb	Laryngeal cancer (excl. UKB)	Laryngeal cancer (excl. UKB) || ||	TRUE	igd	NA	NA	NA	NA	NA	NA	NA	12	122963550	0.0031	2.324e-28	703003	BMI_strict	TRUE	reported	HKLPXU	textfile	2	1	TRUE
	rs12421848	A	G	A	G	-0.0141	0.035657	0.3962	0.382731	FALSE	FALSE	FALSE	ieu-b-5125	11	892089	0.0355745	NA	0.316189	LA_noukb	Laryngeal cancer (excl. UKB)	Laryngeal cancer (excl. UKB) || ||	TRUE	igd	TRUE	rs12421848	rs7952102	A	G	C	T	11	891338	0.0019	3.993e-13	484680	BMI_strict	TRUE	reported	HKLPXU	textfile	2	1	TRUE
	rs12429545	A	G	A	G	0.0313	0.0633053	0.1218	0.124465	FALSE	FALSE	FALSE	ieu-b-5125	13	54102206	0.0510046	NA	0.214544	LA_noukb	Laryngeal cancer (excl. UKB)	Laryngeal cancer (excl. UKB) || ||	TRUE	igd	NA	NA	NA	NA	NA	NA	NA	13	54102206	0.0024	1.419e-37	797614	BMI_strict	TRUE	reported	HKLPXU	textfile	2	1	TRUE
	rs12439632	C	G	C	G	0.0145	-0.0660274	0.1682	0.150925	FALSE	TRUE	FALSE	ieu-b-5125	15	59103963	0.0483879	NA	0.172396	LA_noukb	Laryngeal cancer (excl. UKB)	Laryngeal cancer (excl. UKB) || ||	TRUE	igd	NA	NA	NA	NA	NA	NA	NA	15	59103963	0.0023	3.675e-10	718615	BMI_strict	TRUE	reported	HKLPXU	textfile	2	1	TRUE
	rs12448257	A	G	A	G	0.0161	0.0122014	0.2185	0.20904	FALSE	FALSE	FALSE	ieu-b-5125	16	3599655	0.0423236	NA	0.773126	LA_noukb	Laryngeal cancer (excl. UKB)	Laryngeal cancer (excl. UKB) || ||	TRUE	igd	NA	NA	NA	NA	NA	NA	NA	16	3599655	0.002	9.035e-16	797946	BMI_strict	TRUE	reported	HKLPXU	textfile	2	1	TRUE
	rs12462975	A	G	A	G	0.0193	-0.0395463	0.3243	0.319601	FALSE	FALSE	FALSE	ieu-b-5125	19	30277729	0.0368817	NA	0.283609	LA_noukb	Laryngeal cancer (excl. UKB)	Laryngeal cancer (excl. UKB) || ||	TRUE	igd	TRUE	rs12462975	rs113701136	A	G	T	C	19	30272202	0.0018	1.474e-25	717340	BMI_strict	TRUE	reported	HKLPXU	textfile	2	1	TRUE
	rs12527426	A	G	A	G	0.015	-0.0511897	0.3	0.29013	FALSE	FALSE	FALSE	ieu-b-5125	6	153392908	0.0374663	NA	0.171849	LA_noukb	Laryngeal cancer (excl. UKB)	Laryngeal cancer (excl. UKB) || ||	TRUE	igd	TRUE	rs12527426	rs9478384	A	G	C	T	6	153392002	0.0019	5.544e-16	717888	BMI_strict	TRUE	reported	HKLPXU	textfile	2	1	TRUE
	rs12594043	C	G	C	G	0.0102	-0.0965652	0.5205	0.516815	FALSE	TRUE	TRUE	ieu-b-5125	15	27034988	0.0343736	NA	0.00496512	LA_noukb	Laryngeal cancer (excl. UKB)	Laryngeal cancer (excl. UKB) || ||	TRUE	igd	NA	NA	NA	NA	NA	NA	NA	15	27034988	0.0017	1.312e-09	718508	BMI_strict	TRUE	reported	HKLPXU	textfile	2	1	FALSE
	rs12602912	T	C	T	C	0.0166	-0.0173854	0.212	0.197382	FALSE	FALSE	FALSE	ieu-b-5125	17	65870073	0.0431995	NA	0.687356	LA_noukb	Laryngeal cancer (excl. UKB)	Laryngeal cancer (excl. UKB) || ||	TRUE	igd	NA	NA	NA	NA	NA	NA	NA	17	65870073	0.002	2.899e-16	788746	BMI_strict	TRUE	reported	HKLPXU	textfile	2	1	TRUE
	rs12628051	T	C	T	C	0.0161	-0.000320135	0.6407	0.653631	FALSE	FALSE	FALSE	ieu-b-5125	22	40654276	0.0357425	NA	0.992854	LA_noukb	Laryngeal cancer (excl. UKB)	Laryngeal cancer (excl. UKB) || ||	TRUE	igd	NA	NA	NA	NA	NA	NA	NA	22	40654276	0.0018	2.9e-19	715009	BMI_strict	TRUE	reported	HKLPXU	textfile	2	1	TRUE
	rs12628891	T	C	T	C	-0.0115	-0.0851334	0.3186	0.318484	FALSE	FALSE	FALSE	ieu-b-5125	22	38317137	0.0372654	NA	0.0223414	LA_noukb	Laryngeal cancer (excl. UKB)	Laryngeal cancer (excl. UKB) || ||	TRUE	igd	NA	NA	NA	NA	NA	NA	NA	22	38317137	0.0019	5.852e-10	718155	BMI_strict	TRUE	reported	HKLPXU	textfile	2	1	TRUE
	rs12635553	A	T	A	T	0.0099	0.033572	0.486	0.497211	FALSE	TRUE	TRUE	ieu-b-5125	3	171116603	0.0342724	NA	0.327302	LA_noukb	Laryngeal cancer (excl. UKB)	Laryngeal cancer (excl. UKB) || ||	TRUE	igd	TRUE	rs12635553	rs10936682	T	A	G	A	3	171113714	0.0017	4.102e-09	714859	BMI_strict	TRUE	reported	HKLPXU	textfile	2	1	FALSE
	rs12636480	T	G	T	G	0.0128	0.052993	0.3507	0.361234	FALSE	FALSE	FALSE	ieu-b-5125	3	82719412	0.035496	NA	0.135456	LA_noukb	Laryngeal cancer (excl. UKB)	Laryngeal cancer (excl. UKB) || ||	TRUE	igd	NA	NA	NA	NA	NA	NA	NA	3	82719412	0.0018	6.96e-13	718231	BMI_strict	TRUE	reported	HKLPXU	textfile	2	1	TRUE
	rs12652212	A	G	A	G	-0.0131	0.0299595	0.5611	0.575465	FALSE	FALSE	FALSE	ieu-b-5125	5	88808594	0.0345181	NA	0.38543	LA_noukb	Laryngeal cancer (excl. UKB)	Laryngeal cancer (excl. UKB) || ||	TRUE	igd	NA	NA	NA	NA	NA	NA	NA	5	88808594	0.0016	1.633e-15	806515	BMI_strict	TRUE	reported	HKLPXU	textfile	2	1	TRUE
	rs1268065	A	G	A	G	-0.01	0.021984	0.5	0.474954	FALSE	FALSE	FALSE	ieu-b-5125	6	126042783	0.0340936	NA	0.519049	LA_noukb	Laryngeal cancer (excl. UKB)	Laryngeal cancer (excl. UKB) || ||	TRUE	igd	NA	NA	NA	NA	NA	NA	NA	6	126042783	0.0016	7.119e-10	786277	BMI_strict	TRUE	reported	HKLPXU	textfile	2	1	TRUE
	rs12680842	A	G	A	G	0.0142	0.0131118	0.6839	0.678926	FALSE	FALSE	FALSE	ieu-b-5125	8	95582606	0.0364385	NA	0.71897	LA_noukb	Laryngeal cancer (excl. UKB)	Laryngeal cancer (excl. UKB) || ||	TRUE	igd	NA	NA	NA	NA	NA	NA	NA	8	95582606	0.0017	3.411e-16	800300	BMI_strict	TRUE	reported	HKLPXU	textfile	2	1	TRUE
	rs12681792	A	C	A	C	0.015	0.0240452	0.2024	0.194083	FALSE	FALSE	FALSE	ieu-b-5125	8	62054463	0.0429354	NA	0.575458	LA_noukb	Laryngeal cancer (excl. UKB)	Laryngeal cancer (excl. UKB) || ||	TRUE	igd	NA	NA	NA	NA	NA	NA	NA	8	62054463	0.0021	2.883e-12	717806	BMI_strict	TRUE	reported	HKLPXU	textfile	2	1	TRUE
	rs12692596	T	C	T	C	0.012	-0.0224182	0.3618	0.371153	FALSE	FALSE	FALSE	ieu-b-5125	2	161265910	0.0352191	NA	0.524428	LA_noukb	Laryngeal cancer (excl. UKB)	Laryngeal cancer (excl. UKB) || ||	TRUE	igd	NA	NA	NA	NA	NA	NA	NA	2	161265910	0.0017	1.032e-12	806739	BMI_strict	TRUE	reported	HKLPXU	textfile	2	1	TRUE
	rs12714199	T	C	T	C	-0.0141	-0.0139002	0.6146	0.623997	FALSE	FALSE	FALSE	ieu-b-5125	2	86812549	0.0350653	NA	0.691802	LA_noukb	Laryngeal cancer (excl. UKB)	Laryngeal cancer (excl. UKB) || ||	TRUE	igd	NA	NA	NA	NA	NA	NA	NA	2	86812549	0.0017	3.219e-16	718671	BMI_strict	TRUE	reported	HKLPXU	textfile	2	1	TRUE
	rs12765914	T	C	T	C	0.0226	0.0407863	0.0801	0.0872329	FALSE	FALSE	FALSE	ieu-b-5125	10	34013507	0.0601845	NA	0.497969	LA_noukb	Laryngeal cancer (excl. UKB)	Laryngeal cancer (excl. UKB) || ||	TRUE	igd	NA	NA	NA	NA	NA	NA	NA	10	34013507	0.0031	1.96e-13	718619	BMI_strict	TRUE	reported	HKLPXU	textfile	2	1	TRUE
	rs12868881	A	T	A	T	0.0138	-0.0129901	0.4066	0.420588	FALSE	TRUE	TRUE	ieu-b-5125	13	112218924	0.0345665	NA	0.707064	LA_noukb	Laryngeal cancer (excl. UKB)	Laryngeal cancer (excl. UKB) || ||	TRUE	igd	NA	NA	NA	NA	NA	NA	NA	13	112218924	0.0017	1.401e-15	718650	BMI_strict	TRUE	reported	HKLPXU	textfile	2	1	FALSE
	rs12888545	A	G	A	G	-0.0133	0.0597125	0.7464	0.750782	FALSE	FALSE	FALSE	ieu-b-5125	14	88308044	0.0395679	NA	0.131269	LA_noukb	Laryngeal cancer (excl. UKB)	Laryngeal cancer (excl. UKB) || ||	TRUE	igd	NA	NA	NA	NA	NA	NA	NA	14	88308044	0.002	1.764e-11	718431	BMI_strict	TRUE	reported	HKLPXU	textfile	2	1	TRUE
	rs12914623	C	G	C	G	-0.0159	0.0120664	0.2722	0.260009	FALSE	TRUE	FALSE	ieu-b-5125	15	80993570	0.0388375	NA	0.756039	LA_noukb	Laryngeal cancer (excl. UKB)	Laryngeal cancer (excl. UKB) || ||	TRUE	igd	NA	NA	NA	NA	NA	NA	NA	15	80993570	0.0019	1.999e-16	718054	BMI_strict	TRUE	reported	HKLPXU	textfile	2	1	TRUE
	rs12922346	C	G	C	G	0.0133	0.017684	0.2641	0.271555	FALSE	TRUE	FALSE	ieu-b-5125	16	82438337	0.0385886	NA	0.646758	LA_noukb	Laryngeal cancer (excl. UKB)	Laryngeal cancer (excl. UKB) || ||	TRUE	igd	NA	NA	NA	NA	NA	NA	NA	16	82438337	0.002	1.482e-11	716945	BMI_strict	TRUE	reported	HKLPXU	textfile	2	1	TRUE
	rs12926250	T	G	T	G	0.018	-0.0108789	0.1051	0.0990768	FALSE	FALSE	FALSE	ieu-b-5125	16	72213316	0.0580602	NA	0.851368	LA_noukb	Laryngeal cancer (excl. UKB)	Laryngeal cancer (excl. UKB) || ||	TRUE	igd	NA	NA	NA	NA	NA	NA	NA	16	72213316	0.0028	1.784e-10	718628	BMI_strict	TRUE	reported	HKLPXU	textfile	2	1	TRUE
	rs12939549	A	G	A	G	0.018	-0.0382933	0.5572	0.559261	FALSE	FALSE	FALSE	ieu-b-5125	17	78611724	0.0341424	NA	0.262043	LA_noukb	Laryngeal cancer (excl. UKB)	Laryngeal cancer (excl. UKB) || ||	TRUE	igd	NA	NA	NA	NA	NA	NA	NA	17	78611724	0.0016	3.681e-28	806064	BMI_strict	TRUE	reported	HKLPXU	textfile	2	1	TRUE
	rs1296328	A	C	A	C	0.0166	0.0632996	0.4464	0.448385	FALSE	FALSE	FALSE	ieu-b-5125	4	137083193	0.0343506	NA	0.0653657	LA_noukb	Laryngeal cancer (excl. UKB)	Laryngeal cancer (excl. UKB) || ||	TRUE	igd	NA	NA	NA	NA	NA	NA	NA	4	137083193	0.0017	3.486e-22	717741	BMI_strict	TRUE	reported	HKLPXU	textfile	2	1	TRUE
	rs12981256	A	G	A	G	0.0151	-0.0113682	0.5284	0.522273	FALSE	FALSE	FALSE	ieu-b-5125	19	1865901	0.0359321	NA	0.751713	LA_noukb	Laryngeal cancer (excl. UKB)	Laryngeal cancer (excl. UKB) || ||	TRUE	igd	NA	NA	NA	NA	NA	NA	NA	19	1865901	0.0017	1.432e-18	715373	BMI_strict	TRUE	reported	HKLPXU	textfile	2	1	TRUE
	rs12987009	A	T	A	T	-0.0109	0.0637852	0.5851	0.570698	FALSE	TRUE	TRUE	ieu-b-5125	2	219658170	0.0351139	NA	0.0692899	LA_noukb	Laryngeal cancer (excl. UKB)	Laryngeal cancer (excl. UKB) || ||	TRUE	igd	NA	NA	NA	NA	NA	NA	NA	2	219658170	0.0017	1.834e-10	717653	BMI_strict	TRUE	reported	HKLPXU	textfile	2	1	FALSE
	rs13021737	A	G	A	G	-0.0578	0.000765708	0.1567	0.172537	FALSE	FALSE	FALSE	ieu-b-5125	2	632348	0.0451262	NA	0.986462	LA_noukb	Laryngeal cancer (excl. UKB)	Laryngeal cancer (excl. UKB) || ||	TRUE	igd	NA	NA	NA	NA	NA	NA	NA	2	632348	0.0021	2.89e-161	802967	BMI_strict	TRUE	reported	HKLPXU	textfile	2	1	TRUE
	rs13033310	A	G	A	G	0.0146	-0.0334219	0.2519	0.250284	FALSE	FALSE	FALSE	ieu-b-5125	2	133523605	0.0392813	NA	0.394862	LA_noukb	Laryngeal cancer (excl. UKB)	Laryngeal cancer (excl. UKB) || ||	TRUE	igd	NA	NA	NA	NA	NA	NA	NA	2	133523605	0.0022	3.395e-11	484680	BMI_strict	TRUE	reported	HKLPXU	textfile	2	1	TRUE
	rs13047416	C	G	C	G	0.0152	0.0235197	0.6263	0.623292	FALSE	TRUE	FALSE	ieu-b-5125	21	40309436	0.0353389	NA	0.505701	LA_noukb	Laryngeal cancer (excl. UKB)	Laryngeal cancer (excl. UKB) || ||	TRUE	igd	NA	NA	NA	NA	NA	NA	NA	21	40309436	0.0018	6.934e-18	717914	BMI_strict	TRUE	reported	HKLPXU	textfile	2	1	TRUE
	rs13107325	T	C	T	C	0.0468	0.0566637	0.082	0.0776841	FALSE	FALSE	FALSE	ieu-b-5125	4	103188709	0.0620904	NA	0.361453	LA_noukb	Laryngeal cancer (excl. UKB)	Laryngeal cancer (excl. UKB) || ||	TRUE	igd	NA	NA	NA	NA	NA	NA	NA	4	103188709	0.0032	3.805e-47	806141	BMI_strict	TRUE	reported	HKLPXU	textfile	2	1	TRUE
	rs13110266	A	G	A	G	-0.0124	0.0325617	0.4037	0.408847	FALSE	FALSE	FALSE	ieu-b-5125	4	162129844	0.0347438	NA	0.348658	LA_noukb	Laryngeal cancer (excl. UKB)	Laryngeal cancer (excl. UKB) || ||	TRUE	igd	NA	NA	NA	NA	NA	NA	NA	4	162129844	0.0016	3.956e-14	806749	BMI_strict	TRUE	reported	HKLPXU	textfile	2	1	TRUE
	rs13174863	A	G	A	G	-0.0197	-0.0694862	0.8542	0.851784	FALSE	FALSE	FALSE	ieu-b-5125	5	139080745	0.0475679	NA	0.144076	LA_noukb	Laryngeal cancer (excl. UKB)	Laryngeal cancer (excl. UKB) || ||	TRUE	igd	NA	NA	NA	NA	NA	NA	NA	5	139080745	0.0023	1.939e-17	793550	BMI_strict	TRUE	reported	HKLPXU	textfile	2	1	TRUE
	rs13186194	T	C	T	C	0.01	0.0172979	0.6169	0.624821	FALSE	FALSE	FALSE	ieu-b-5125	5	60795485	0.035287	NA	0.623988	LA_noukb	Laryngeal cancer (excl. UKB)	Laryngeal cancer (excl. UKB) || ||	TRUE	igd	NA	NA	NA	NA	NA	NA	NA	5	60795485	0.0017	2.197e-09	806614	BMI_strict	TRUE	reported	HKLPXU	textfile	2	1	TRUE
	rs13191362	A	G	A	G	0.0235	0.0493928	0.8572	0.87746	FALSE	FALSE	FALSE	ieu-b-5125	6	163033350	0.0527573	NA	0.349156	LA_noukb	Laryngeal cancer (excl. UKB)	Laryngeal cancer (excl. UKB) || ||	TRUE	igd	NA	NA	NA	NA	NA	NA	NA	6	163033350	0.0025	4.079e-21	806582	BMI_strict	TRUE	reported	HKLPXU	textfile	2	1	TRUE
	rs13240600	A	G	A	G	0.018	-0.0273475	0.8343	0.842485	FALSE	FALSE	FALSE	ieu-b-5125	7	99064466	0.0468949	NA	0.559782	LA_noukb	Laryngeal cancer (excl. UKB)	Laryngeal cancer (excl. UKB) || ||	TRUE	igd	NA	NA	NA	NA	NA	NA	NA	7	99064466	0.0022	7.904e-16	718601	BMI_strict	TRUE	reported	HKLPXU	textfile	2	1	TRUE
	rs13245051	A	G	A	G	0.015	0.00433887	0.4557	0.447665	FALSE	FALSE	FALSE	ieu-b-5125	7	113362799	0.0344939	NA	0.899901	LA_noukb	Laryngeal cancer (excl. UKB)	Laryngeal cancer (excl. UKB) || ||	TRUE	igd	NA	NA	NA	NA	NA	NA	NA	7	113362799	0.0017	1.121e-18	714046	BMI_strict	TRUE	reported	HKLPXU	textfile	2	1	TRUE
	rs13263601	A	C	A	C	-0.0145	0.0285848	0.6585	0.646984	FALSE	FALSE	FALSE	ieu-b-5125	8	14095900	0.0355614	NA	0.421504	LA_noukb	Laryngeal cancer (excl. UKB)	Laryngeal cancer (excl. UKB) || ||	TRUE	igd	NA	NA	NA	NA	NA	NA	NA	8	14095900	0.0018	4.867e-16	714980	BMI_strict	TRUE	reported	HKLPXU	textfile	2	1	TRUE
	rs1327259	A	G	A	G	0.0157	-0.0338732	0.6096	0.610377	FALSE	FALSE	FALSE	ieu-b-5125	6	51177811	0.0346488	NA	0.328264	LA_noukb	Laryngeal cancer (excl. UKB)	Laryngeal cancer (excl. UKB) || ||	TRUE	igd	NA	NA	NA	NA	NA	NA	NA	6	51177811	0.0017	1.465e-19	718295	BMI_strict	TRUE	reported	HKLPXU	textfile	2	1	TRUE
	rs13296413	T	C	T	C	-0.0148	0.0590309	0.3811	0.369853	FALSE	FALSE	FALSE	ieu-b-5125	9	37258105	0.0349841	NA	0.0915335	LA_noukb	Laryngeal cancer (excl. UKB)	Laryngeal cancer (excl. UKB) || ||	TRUE	igd	NA	NA	NA	NA	NA	NA	NA	9	37258105	0.0017	2.49e-17	718610	BMI_strict	TRUE	reported	HKLPXU	textfile	2	1	TRUE
	rs1346841	A	G	A	G	-0.0126	0.0153137	0.4116	0.400518	FALSE	FALSE	FALSE	ieu-b-5125	4	65651730	0.034516	NA	0.657281	LA_noukb	Laryngeal cancer (excl. UKB)	Laryngeal cancer (excl. UKB) || ||	TRUE	igd	NA	NA	NA	NA	NA	NA	NA	4	65651730	0.0017	3.183e-13	718293	BMI_strict	TRUE	reported	HKLPXU	textfile	2	1	TRUE
	rs1350430	T	C	T	C	-0.0125	0.048318	0.5328	0.540386	FALSE	FALSE	FALSE	ieu-b-5125	12	41819215	0.0341677	NA	0.157319	LA_noukb	Laryngeal cancer (excl. UKB)	Laryngeal cancer (excl. UKB) || ||	TRUE	igd	NA	NA	NA	NA	NA	NA	NA	12	41819215	0.0017	2.075e-13	718510	BMI_strict	TRUE	reported	HKLPXU	textfile	2	1	TRUE
	rs1356506	T	C	T	C	0.0137	-0.0676808	0.6287	0.628944	FALSE	FALSE	FALSE	ieu-b-5125	18	40708038	0.0354755	NA	0.0564144	LA_noukb	Laryngeal cancer (excl. UKB)	Laryngeal cancer (excl. UKB) || ||	TRUE	igd	NA	NA	NA	NA	NA	NA	NA	18	40708038	0.0018	8.394e-15	718632	BMI_strict	TRUE	reported	HKLPXU	textfile	2	1	TRUE
	rs1358980	T	C	T	C	-0.0129	-0.0456266	0.4735	0.472876	FALSE	FALSE	FALSE	ieu-b-5125	6	43764551	0.03485	NA	0.190457	LA_noukb	Laryngeal cancer (excl. UKB)	Laryngeal cancer (excl. UKB) || ||	TRUE	igd	NA	NA	NA	NA	NA	NA	NA	6	43764551	0.0017	5.151e-15	797930	BMI_strict	TRUE	reported	HKLPXU	textfile	2	1	TRUE
	rs1383592	A	G	A	G	0.0122	0.0125125	0.212	0.204116	FALSE	FALSE	FALSE	ieu-b-5125	8	106430676	0.0418636	NA	0.765026	LA_noukb	Laryngeal cancer (excl. UKB)	Laryngeal cancer (excl. UKB) || ||	TRUE	igd	NA	NA	NA	NA	NA	NA	NA	8	106430676	0.0021	4.92e-09	718467	BMI_strict	TRUE	reported	HKLPXU	textfile	2	1	TRUE
	rs1409818	T	C	T	C	0.0195	-0.036364	0.1074	0.102171	FALSE	FALSE	FALSE	ieu-b-5125	20	21381121	0.0570839	NA	0.524107	LA_noukb	Laryngeal cancer (excl. UKB)	Laryngeal cancer (excl. UKB) || ||	TRUE	igd	NA	NA	NA	NA	NA	NA	NA	20	21381121	0.0028	2.589e-12	718603	BMI_strict	TRUE	reported	HKLPXU	textfile	2	1	TRUE
	rs1412235	C	G	C	G	0.0237	0.0333295	0.3151	0.318291	FALSE	TRUE	FALSE	ieu-b-5125	9	28410996	0.0366317	NA	0.362899	LA_noukb	Laryngeal cancer (excl. UKB)	Laryngeal cancer (excl. UKB) || ||	TRUE	igd	NA	NA	NA	NA	NA	NA	NA	9	28410996	0.0017	2.277e-42	804074	BMI_strict	TRUE	reported	HKLPXU	textfile	2	1	TRUE
	rs1421334	A	C	A	C	0.0135	0.0270341	0.4546	0.45955	FALSE	FALSE	FALSE	ieu-b-5125	8	30865733	0.0345473	NA	0.433907	LA_noukb	Laryngeal cancer (excl. UKB)	Laryngeal cancer (excl. UKB) || ||	TRUE	igd	NA	NA	NA	NA	NA	NA	NA	8	30865733	0.0017	3.111e-15	717941	BMI_strict	TRUE	reported	HKLPXU	textfile	2	1	TRUE
	rs1436344	C	G	C	G	0.0147	-0.0145876	0.5703	0.588608	FALSE	TRUE	TRUE	ieu-b-5125	3	104606144	0.0348826	NA	0.675807	LA_noukb	Laryngeal cancer (excl. UKB)	Laryngeal cancer (excl. UKB) || ||	TRUE	igd	NA	NA	NA	NA	NA	NA	NA	3	104606144	0.0017	1.07e-17	718660	BMI_strict	TRUE	reported	HKLPXU	textfile	2	1	FALSE
	rs1437842	A	G	A	G	-0.0106	-0.00446535	0.4907	0.47862	FALSE	FALSE	FALSE	ieu-b-5125	4	173597016	0.0341057	NA	0.895833	LA_noukb	Laryngeal cancer (excl. UKB)	Laryngeal cancer (excl. UKB) || ||	TRUE	igd	NA	NA	NA	NA	NA	NA	NA	4	173597016	0.0017	8.494e-10	705988	BMI_strict	TRUE	reported	HKLPXU	textfile	2	1	TRUE
	rs1441264	A	G	A	G	0.0174	-0.00553141	0.5846	0.596371	FALSE	FALSE	FALSE	ieu-b-5125	13	79580919	0.0346849	NA	0.873294	LA_noukb	Laryngeal cancer (excl. UKB)	Laryngeal cancer (excl. UKB) || ||	TRUE	igd	NA	NA	NA	NA	NA	NA	NA	13	79580919	0.0017	7.603e-25	794966	BMI_strict	TRUE	reported	HKLPXU	textfile	2	1	TRUE
	rs1451077	A	G	A	G	-0.0169	0.040651	0.5776	0.575814	FALSE	FALSE	FALSE	ieu-b-5125	2	147901207	0.0345806	NA	0.239777	LA_noukb	Laryngeal cancer (excl. UKB)	Laryngeal cancer (excl. UKB) || ||	TRUE	igd	NA	NA	NA	NA	NA	NA	NA	2	147901207	0.0019	1.426e-18	484680	BMI_strict	TRUE	reported	HKLPXU	textfile	2	1	TRUE
	rs147568678	T	C	T	C	0.0134	-0.00460219	0.7684	0.766386	FALSE	FALSE	FALSE	ieu-b-5125	10	93061851	0.0402989	NA	0.909078	LA_noukb	Laryngeal cancer (excl. UKB)	Laryngeal cancer (excl. UKB) || ||	TRUE	igd	NA	NA	NA	NA	NA	NA	NA	10	93061851	0.0023	3.422e-09	484680	BMI_strict	TRUE	reported	HKLPXU	textfile	2	1	TRUE
	rs1477199	A	G	A	G	-0.0221	0.0285283	0.8426	0.856419	FALSE	FALSE	FALSE	ieu-b-5125	16	53712135	0.0489172	NA	0.559761	LA_noukb	Laryngeal cancer (excl. UKB)	Laryngeal cancer (excl. UKB) || ||	TRUE	igd	NA	NA	NA	NA	NA	NA	NA	16	53712135	0.0023	5.145e-21	806707	BMI_strict	TRUE	reported	HKLPXU	textfile	2	1	TRUE
	rs1492014	T	C	T	C	-0.0171	-0.0578493	0.5674	0.580485	FALSE	FALSE	FALSE	ieu-b-5125	3	94071481	0.0347025	NA	0.0955125	LA_noukb	Laryngeal cancer (excl. UKB)	Laryngeal cancer (excl. UKB) || ||	TRUE	igd	NA	NA	NA	NA	NA	NA	NA	3	94071481	0.0017	1.442e-23	718371	BMI_strict	TRUE	reported	HKLPXU	textfile	2	1	TRUE
	rs1492767	T	C	T	C	0.0095	0.0190145	0.4681	0.499145	FALSE	FALSE	FALSE	ieu-b-5125	4	55221467	0.0344207	NA	0.580663	LA_noukb	Laryngeal cancer (excl. UKB)	Laryngeal cancer (excl. UKB) || ||	TRUE	igd	NA	NA	NA	NA	NA	NA	NA	4	55221467	0.0016	3.546e-09	806046	BMI_strict	TRUE	reported	HKLPXU	textfile	2	1	TRUE
	rs1501673	A	G	A	G	0.0289	-0.0271196	0.1355	0.133817	FALSE	FALSE	FALSE	ieu-b-5125	5	87963600	0.049877	NA	0.586627	LA_noukb	Laryngeal cancer (excl. UKB)	Laryngeal cancer (excl. UKB) || ||	TRUE	igd	NA	NA	NA	NA	NA	NA	NA	5	87963600	0.0025	2.725e-31	718652	BMI_strict	TRUE	reported	HKLPXU	textfile	2	1	TRUE
	rs1522569	T	G	T	G	0.0141	-0.105381	0.8183	0.817164	FALSE	FALSE	FALSE	ieu-b-5125	4	171632637	0.0434216	NA	0.0152275	LA_noukb	Laryngeal cancer (excl. UKB)	Laryngeal cancer (excl. UKB) || ||	TRUE	igd	NA	NA	NA	NA	NA	NA	NA	4	171632637	0.0022	1.599e-10	718485	BMI_strict	TRUE	reported	HKLPXU	textfile	2	1	TRUE
	rs1559673	A	C	A	C	0.0359	-0.133463	0.9688	0.975606	FALSE	FALSE	FALSE	ieu-b-5125	15	62156514	0.103919	NA	0.199039	LA_noukb	Laryngeal cancer (excl. UKB)	Laryngeal cancer (excl. UKB) || ||	TRUE	igd	NA	NA	NA	NA	NA	NA	NA	15	62156514	0.0049	2.212e-13	791967	BMI_strict	TRUE	reported	HKLPXU	textfile	2	1	TRUE
	rs156201	C	G	C	G	0.0124	-0.0310051	0.7459	0.748263	FALSE	TRUE	FALSE	ieu-b-5125	6	104847441	0.0390911	NA	0.427691	LA_noukb	Laryngeal cancer (excl. UKB)	Laryngeal cancer (excl. UKB) || ||	TRUE	igd	NA	NA	NA	NA	NA	NA	NA	6	104847441	0.0019	1.646e-10	718454	BMI_strict	TRUE	reported	HKLPXU	textfile	2	1	TRUE
	rs16851483	T	G	T	G	0.0352	0.062618	0.0717	0.0641183	FALSE	FALSE	FALSE	ieu-b-5125	3	141275436	0.0696529	NA	0.368653	LA_noukb	Laryngeal cancer (excl. UKB)	Laryngeal cancer (excl. UKB) || ||	TRUE	igd	NA	NA	NA	NA	NA	NA	NA	3	141275436	0.0034	4.869e-25	718609	BMI_strict	TRUE	reported	HKLPXU	textfile	2	1	TRUE
	rs16906838	T	C	T	C	-0.0247	-0.0760179	0.0486	0.0484915	FALSE	FALSE	FALSE	ieu-b-5125	8	138213836	0.0806483	NA	0.345893	LA_noukb	Laryngeal cancer (excl. UKB)	Laryngeal cancer (excl. UKB) || ||	TRUE	igd	NA	NA	NA	NA	NA	NA	NA	8	138213836	0.004	4.305e-10	706788	BMI_strict	TRUE	reported	HKLPXU	textfile	2	1	TRUE
	rs17024393	T	C	T	C	-0.0644	0.0158792	0.9689	0.968374	FALSE	FALSE	FALSE	ieu-b-5125	1	110154688	0.0972892	NA	0.870348	LA_noukb	Laryngeal cancer (excl. UKB)	Laryngeal cancer (excl. UKB) || ||	TRUE	igd	NA	NA	NA	NA	NA	NA	NA	1	110154688	0.0049	7.105e-39	782554	BMI_strict	TRUE	reported	HKLPXU	textfile	2	1	TRUE
	rs17094222	T	C	T	C	-0.0173	0.00542639	0.7912	0.791927	FALSE	FALSE	FALSE	ieu-b-5125	10	102395440	0.0419812	NA	0.897154	LA_noukb	Laryngeal cancer (excl. UKB)	Laryngeal cancer (excl. UKB) || ||	TRUE	igd	NA	NA	NA	NA	NA	NA	NA	10	102395440	0.002	4.043e-18	806450	BMI_strict	TRUE	reported	HKLPXU	textfile	2	1	TRUE
	rs17149254	T	C	T	C	0.0238	-0.018724	0.2051	0.172998	FALSE	FALSE	FALSE	ieu-b-5125	7	76691994	0.0472872	NA	0.692131	LA_noukb	Laryngeal cancer (excl. UKB)	Laryngeal cancer (excl. UKB) || ||	TRUE	igd	TRUE	rs17149254	rs56076430	T	C	C	G	7	76634463	0.0023	2.993e-25	654047	BMI_strict	TRUE	reported	HKLPXU	textfile	2	1	TRUE
	rs17182027	A	G	A	G	-0.011	0.0162511	0.5647	0.556778	FALSE	FALSE	FALSE	ieu-b-5125	14	73348130	0.0342149	NA	0.634807	LA_noukb	Laryngeal cancer (excl. UKB)	Laryngeal cancer (excl. UKB) || ||	TRUE	igd	NA	NA	NA	NA	NA	NA	NA	14	73348130	0.0017	1.46e-10	717831	BMI_strict	TRUE	reported	HKLPXU	textfile	2	1	TRUE
	rs17207196	T	C	T	C	-0.022	-0.0580497	0.42	0.39404	FALSE	FALSE	FALSE	ieu-b-5125	7	75101065	0.0367385	NA	0.114089	LA_noukb	Laryngeal cancer (excl. UKB)	Laryngeal cancer (excl. UKB) || ||	TRUE	igd	NA	NA	NA	NA	NA	NA	NA	7	75101065	0.0017	1.576e-36	694986	BMI_strict	TRUE	reported	HKLPXU	textfile	2	1	TRUE
	rs1721447	T	G	T	G	-0.01	0.00886337	0.5096	0.535425	FALSE	FALSE	FALSE	ieu-b-5125	7	109214139	0.0339654	NA	0.794129	LA_noukb	Laryngeal cancer (excl. UKB)	Laryngeal cancer (excl. UKB) || ||	TRUE	igd	NA	NA	NA	NA	NA	NA	NA	7	109214139	0.0017	3.793e-09	718656	BMI_strict	TRUE	reported	HKLPXU	textfile	2	1	TRUE
	rs17367750	T	C	T	C	-0.0122	-0.0157852	0.3117	0.32551	FALSE	FALSE	FALSE	ieu-b-5125	4	140782542	0.0364251	NA	0.664753	LA_noukb	Laryngeal cancer (excl. UKB)	Laryngeal cancer (excl. UKB) || ||	TRUE	igd	NA	NA	NA	NA	NA	NA	NA	4	140782542	0.0018	1.969e-11	718303	BMI_strict	TRUE	reported	HKLPXU	textfile	2	1	TRUE
	rs17405603	A	T	A	T	-0.0125	-0.00679344	0.7062	0.69979	FALSE	TRUE	FALSE	ieu-b-5125	5	144608340	0.0376753	NA	0.856905	LA_noukb	Laryngeal cancer (excl. UKB)	Laryngeal cancer (excl. UKB) || ||	TRUE	igd	NA	NA	NA	NA	NA	NA	NA	5	144608340	0.0019	4.427e-11	716852	BMI_strict	TRUE	reported	HKLPXU	textfile	2	1	TRUE
	rs17405819	T	C	T	C	0.0211	0.00692785	0.6845	0.697234	FALSE	FALSE	FALSE	ieu-b-5125	8	76806584	0.0371218	NA	0.851955	LA_noukb	Laryngeal cancer (excl. UKB)	Laryngeal cancer (excl. UKB) || ||	TRUE	igd	NA	NA	NA	NA	NA	NA	NA	8	76806584	0.0018	6.04e-33	806765	BMI_strict	TRUE	reported	HKLPXU	textfile	2	1	TRUE
	rs1750307	A	T	A	T	0.0129	-0.0424407	0.3655	0.365796	FALSE	TRUE	FALSE	ieu-b-5125	1	156488420	0.035767	NA	0.235389	LA_noukb	Laryngeal cancer (excl. UKB)	Laryngeal cancer (excl. UKB) || ||	TRUE	igd	NA	NA	NA	NA	NA	NA	NA	1	156488420	0.0018	2.778e-13	718639	BMI_strict	TRUE	reported	HKLPXU	textfile	2	1	TRUE
	rs17636031	T	C	T	C	-0.0154	0.0619354	0.7244	0.719914	FALSE	FALSE	FALSE	ieu-b-5125	10	126594078	0.0388513	NA	0.110899	LA_noukb	Laryngeal cancer (excl. UKB)	Laryngeal cancer (excl. UKB) || ||	TRUE	igd	NA	NA	NA	NA	NA	NA	NA	10	126594078	0.0018	3.87e-17	798189	BMI_strict	TRUE	reported	HKLPXU	textfile	2	1	TRUE
	rs17681451	A	G	A	G	-0.0225	-0.067657	0.0762	0.080248	FALSE	FALSE	FALSE	ieu-b-5125	3	114399296	0.0639146	NA	0.289803	LA_noukb	Laryngeal cancer (excl. UKB)	Laryngeal cancer (excl. UKB) || ||	TRUE	igd	NA	NA	NA	NA	NA	NA	NA	3	114399296	0.0031	7.37e-13	718679	BMI_strict	TRUE	reported	HKLPXU	textfile	2	1	TRUE
	rs17724992	A	G	A	G	0.0172	0.0214501	0.7197	0.737524	FALSE	FALSE	FALSE	ieu-b-5125	19	18454825	0.0391449	NA	0.583715	LA_noukb	Laryngeal cancer (excl. UKB)	Laryngeal cancer (excl. UKB) || ||	TRUE	igd	NA	NA	NA	NA	NA	NA	NA	19	18454825	0.0018	5.232e-21	804268	BMI_strict	TRUE	reported	HKLPXU	textfile	2	1	TRUE
	rs17783165	T	C	T	C	-0.0128	0.101086	0.671	0.673365	FALSE	FALSE	FALSE	ieu-b-5125	18	63461638	0.0375265	NA	0.0070661	LA_noukb	Laryngeal cancer (excl. UKB)	Laryngeal cancer (excl. UKB) || ||	TRUE	igd	NA	NA	NA	NA	NA	NA	NA	18	63461638	0.0017	2.737e-13	801018	BMI_strict	TRUE	reported	HKLPXU	textfile	2	1	TRUE
	rs17806224	A	G	A	G	-0.026	-0.0774058	0.1808	0.178998	FALSE	FALSE	FALSE	ieu-b-5125	20	51065854	0.0451002	NA	0.0861053	LA_noukb	Laryngeal cancer (excl. UKB)	Laryngeal cancer (excl. UKB) || ||	TRUE	igd	NA	NA	NA	NA	NA	NA	NA	20	51065854	0.0022	7.908e-32	718699	BMI_strict	TRUE	reported	HKLPXU	textfile	2	1	TRUE
	rs17814208	A	G	A	G	-0.0129	0.0360396	0.7575	0.757845	FALSE	FALSE	FALSE	ieu-b-5125	2	144037998	0.0399426	NA	0.366906	LA_noukb	Laryngeal cancer (excl. UKB)	Laryngeal cancer (excl. UKB) || ||	TRUE	igd	NA	NA	NA	NA	NA	NA	NA	2	144037998	0.002	7.239e-11	718642	BMI_strict	TRUE	reported	HKLPXU	textfile	2	1	TRUE
	rs1799923	A	G	A	G	-0.0224	0.00678145	0.1117	0.121701	FALSE	FALSE	FALSE	ieu-b-5125	3	42306294	0.0540049	NA	0.900072	LA_noukb	Laryngeal cancer (excl. UKB)	Laryngeal cancer (excl. UKB) || ||	TRUE	igd	NA	NA	NA	NA	NA	NA	NA	3	42306294	0.0026	1.124e-17	718667	BMI_strict	TRUE	reported	HKLPXU	textfile	2	1	TRUE
	rs1808629	A	G	A	G	-0.0202	0.00819279	0.674	0.681022	FALSE	FALSE	FALSE	ieu-b-5125	8	73435964	0.0373001	NA	0.826147	LA_noukb	Laryngeal cancer (excl. UKB)	Laryngeal cancer (excl. UKB) || ||	TRUE	igd	NA	NA	NA	NA	NA	NA	NA	8	73435964	0.002	2.191e-23	484680	BMI_strict	TRUE	reported	HKLPXU	textfile	2	1	TRUE
	rs185350	T	C	T	C	0.0137	-0.0160961	0.4902	0.505418	FALSE	FALSE	FALSE	ieu-b-5125	19	34306816	0.0340754	NA	0.636665	LA_noukb	Laryngeal cancer (excl. UKB)	Laryngeal cancer (excl. UKB) || ||	TRUE	igd	NA	NA	NA	NA	NA	NA	NA	19	34306816	0.0016	9.104e-17	805076	BMI_strict	TRUE	reported	HKLPXU	textfile	2	1	TRUE
	rs1860561	A	G	A	G	0.0159	-0.00427134	0.2087	0.22731	FALSE	FALSE	FALSE	ieu-b-5125	12	110783241	0.0409895	NA	0.917006	LA_noukb	Laryngeal cancer (excl. UKB)	Laryngeal cancer (excl. UKB) || ||	TRUE	igd	NA	NA	NA	NA	NA	NA	NA	12	110783241	0.0019	1.706e-16	806805	BMI_strict	TRUE	reported	HKLPXU	textfile	2	1	TRUE
	rs1877875	T	C	T	C	-0.0109	-0.0219336	0.4341	0.436556	FALSE	FALSE	FALSE	ieu-b-5125	9	120664469	0.0341641	NA	0.52087	LA_noukb	Laryngeal cancer (excl. UKB)	Laryngeal cancer (excl. UKB) || ||	TRUE	igd	NA	NA	NA	NA	NA	NA	NA	9	120664469	0.0017	2.505e-10	718589	BMI_strict	TRUE	reported	HKLPXU	textfile	2	1	TRUE
	rs1884389	T	C	T	C	-0.0108	0.0315903	0.4386	0.440281	FALSE	FALSE	FALSE	ieu-b-5125	20	1410582	0.0344099	NA	0.358589	LA_noukb	Laryngeal cancer (excl. UKB)	Laryngeal cancer (excl. UKB) || ||	TRUE	igd	NA	NA	NA	NA	NA	NA	NA	20	1410582	0.0017	3.724e-10	718491	BMI_strict	TRUE	reported	HKLPXU	textfile	2	1	TRUE
	rs1884897	A	G	A	G	-0.0184	-0.0123872	0.3747	0.373476	FALSE	FALSE	FALSE	ieu-b-5125	20	6614691	0.0353466	NA	0.726001	LA_noukb	Laryngeal cancer (excl. UKB)	Laryngeal cancer (excl. UKB) || ||	TRUE	igd	TRUE	rs1884897	rs1321432	A	G	A	C	20	6612832	0.0017	2.701e-28	806711	BMI_strict	TRUE	reported	HKLPXU	textfile	2	1	TRUE
	rs1927790	T	C	T	C	-0.014	0.0680521	0.606	0.586053	FALSE	FALSE	FALSE	ieu-b-5125	13	96922191	0.0344906	NA	0.0484886	LA_noukb	Laryngeal cancer (excl. UKB)	Laryngeal cancer (excl. UKB) || ||	TRUE	igd	NA	NA	NA	NA	NA	NA	NA	13	96922191	0.0016	1.571e-17	806731	BMI_strict	TRUE	reported	HKLPXU	textfile	2	1	TRUE
	rs1928295	T	C	T	C	0.0134	0.0257913	0.5712	0.563116	FALSE	FALSE	FALSE	ieu-b-5125	9	120378483	0.034366	NA	0.45296	LA_noukb	Laryngeal cancer (excl. UKB)	Laryngeal cancer (excl. UKB) || ||	TRUE	igd	NA	NA	NA	NA	NA	NA	NA	9	120378483	0.0016	2.225e-16	806659	BMI_strict	TRUE	reported	HKLPXU	textfile	2	1	TRUE
	rs1941696	A	G	A	G	0.0112	-0.0318824	0.5174	0.516115	FALSE	FALSE	FALSE	ieu-b-5125	18	31252129	0.0340786	NA	0.349502	LA_noukb	Laryngeal cancer (excl. UKB)	Laryngeal cancer (excl. UKB) || ||	TRUE	igd	NA	NA	NA	NA	NA	NA	NA	18	31252129	0.0017	4.741e-11	718672	BMI_strict	TRUE	reported	HKLPXU	textfile	2	1	TRUE
	rs1948080	T	G	T	G	0.0136	-0.000475165	0.6303	0.625336	FALSE	FALSE	FALSE	ieu-b-5125	9	11852043	0.0351621	NA	0.989218	LA_noukb	Laryngeal cancer (excl. UKB)	Laryngeal cancer (excl. UKB) || ||	TRUE	igd	NA	NA	NA	NA	NA	NA	NA	9	11852043	0.0018	1.134e-14	718672	BMI_strict	TRUE	reported	HKLPXU	textfile	2	1	TRUE
	rs194809	A	G	A	G	0.0126	-0.0199468	0.1871	0.196211	FALSE	FALSE	FALSE	ieu-b-5125	16	23804956	0.0430704	NA	0.643278	LA_noukb	Laryngeal cancer (excl. UKB)	Laryngeal cancer (excl. UKB) || ||	TRUE	igd	NA	NA	NA	NA	NA	NA	NA	16	23804956	0.0022	4.861e-09	718688	BMI_strict	TRUE	reported	HKLPXU	textfile	2	1	TRUE
	rs1951455	T	C	T	C	-0.0148	-0.00976859	0.2813	0.247642	FALSE	FALSE	FALSE	ieu-b-5125	14	91515754	0.0398029	NA	0.806128	LA_noukb	Laryngeal cancer (excl. UKB)	Laryngeal cancer (excl. UKB) || ||	TRUE	igd	TRUE	rs1951455	rs1296091	T	C	T	C	14	91512339	0.0019	6.048e-15	718607	BMI_strict	TRUE	reported	HKLPXU	textfile	2	1	TRUE
	rs1958898	C	G	C	G	-0.0146	0.00741762	0.2098	0.212664	FALSE	TRUE	FALSE	ieu-b-5125	14	40886886	0.0415237	NA	0.858224	LA_noukb	Laryngeal cancer (excl. UKB)	Laryngeal cancer (excl. UKB) || ||	TRUE	igd	NA	NA	NA	NA	NA	NA	NA	14	40886886	0.0021	4.225e-12	718191	BMI_strict	TRUE	reported	HKLPXU	textfile	2	1	TRUE
	rs1965529	A	G	A	G	0.0161	0.0171334	0.773	0.778955	FALSE	FALSE	FALSE	ieu-b-5125	7	77829965	0.0409847	NA	0.675915	LA_noukb	Laryngeal cancer (excl. UKB)	Laryngeal cancer (excl. UKB) || ||	TRUE	igd	TRUE	rs1965529	rs7792703	G	A	A	C	7	77825707	0.0022	7.659e-14	663213	BMI_strict	TRUE	reported	HKLPXU	textfile	2	1	TRUE
	rs197374	T	C	T	C	0.0141	0.0404456	0.4027	0.393913	FALSE	FALSE	FALSE	ieu-b-5125	1	112289983	0.0348741	NA	0.246145	LA_noukb	Laryngeal cancer (excl. UKB)	Laryngeal cancer (excl. UKB) || ||	TRUE	igd	NA	NA	NA	NA	NA	NA	NA	1	112289983	0.0017	3.155e-16	718653	BMI_strict	TRUE	reported	HKLPXU	textfile	2	1	TRUE
	rs1999433	T	C	T	C	-0.0107	-0.0670859	0.4403	0.434749	FALSE	FALSE	FALSE	ieu-b-5125	9	81371441	0.0348692	NA	0.0543638	LA_noukb	Laryngeal cancer (excl. UKB)	Laryngeal cancer (excl. UKB) || ||	TRUE	igd	NA	NA	NA	NA	NA	NA	NA	9	81371441	0.0017	2.899e-10	718517	BMI_strict	TRUE	reported	HKLPXU	textfile	2	1	TRUE
	rs2007518	A	G	A	G	-0.013	0.0275272	0.5618	0.566856	FALSE	FALSE	FALSE	ieu-b-5125	11	132639606	0.0347643	NA	0.428463	LA_noukb	Laryngeal cancer (excl. UKB)	Laryngeal cancer (excl. UKB) || ||	TRUE	igd	NA	NA	NA	NA	NA	NA	NA	11	132639606	0.0017	1.964e-14	718682	BMI_strict	TRUE	reported	HKLPXU	textfile	2	1	TRUE
	rs2047648	A	T	A	T	-0.0133	0.0361328	0.7465	0.74686	FALSE	TRUE	FALSE	ieu-b-5125	3	157044173	0.039461	NA	0.359846	LA_noukb	Laryngeal cancer (excl. UKB)	Laryngeal cancer (excl. UKB) || ||	TRUE	igd	TRUE	rs2047648	rs10936081	T	A	A	G	3	157033438	0.002	7.947e-12	718280	BMI_strict	TRUE	reported	HKLPXU	textfile	2	1	TRUE
	rs2051559	T	C	T	C	-0.0167	-0.0687456	0.8588	0.862502	FALSE	FALSE	FALSE	ieu-b-5125	4	3298800	0.0489985	NA	0.160613	LA_noukb	Laryngeal cancer (excl. UKB)	Laryngeal cancer (excl. UKB) || ||	TRUE	igd	NA	NA	NA	NA	NA	NA	NA	4	3298800	0.0025	3.775e-11	718374	BMI_strict	TRUE	reported	HKLPXU	textfile	2	1	TRUE
	rs2053682	A	C	A	C	0.017	0.0268961	0.6784	0.673666	FALSE	FALSE	FALSE	ieu-b-5125	5	170599327	0.0366588	NA	0.463138	LA_noukb	Laryngeal cancer (excl. UKB)	Laryngeal cancer (excl. UKB) || ||	TRUE	igd	NA	NA	NA	NA	NA	NA	NA	5	170599327	0.0018	2.591e-20	717007	BMI_strict	TRUE	reported	HKLPXU	textfile	2	1	TRUE
	rs2058527	T	G	T	G	-0.0115	0.0449789	0.2715	0.261438	FALSE	FALSE	FALSE	ieu-b-5125	16	6704749	0.0385889	NA	0.24378	LA_noukb	Laryngeal cancer (excl. UKB)	Laryngeal cancer (excl. UKB) || ||	TRUE	igd	NA	NA	NA	NA	NA	NA	NA	16	6704749	0.0019	1.795e-09	718465	BMI_strict	TRUE	reported	HKLPXU	textfile	2	1	TRUE
	rs2065418	T	G	T	G	0.0139	0.016821	0.646	0.638495	FALSE	FALSE	FALSE	ieu-b-5125	11	30422068	0.0354407	NA	0.635055	LA_noukb	Laryngeal cancer (excl. UKB)	Laryngeal cancer (excl. UKB) || ||	TRUE	igd	NA	NA	NA	NA	NA	NA	NA	11	30422068	0.0018	6.073e-15	718408	BMI_strict	TRUE	reported	HKLPXU	textfile	2	1	TRUE
	rs2066295	A	G	A	G	0.0142	0.0623228	0.7577	0.763291	FALSE	FALSE	FALSE	ieu-b-5125	6	26168903	0.0403004	NA	0.121995	LA_noukb	Laryngeal cancer (excl. UKB)	Laryngeal cancer (excl. UKB) || ||	TRUE	igd	NA	NA	NA	NA	NA	NA	NA	6	26168903	0.002	2.285e-12	718598	BMI_strict	TRUE	reported	HKLPXU	textfile	2	1	TRUE
	rs2074314	T	C	T	C	0.0105	0.0290248	0.6356	0.637998	FALSE	FALSE	FALSE	ieu-b-5125	11	17411821	0.0352875	NA	0.410778	LA_noukb	Laryngeal cancer (excl. UKB)	Laryngeal cancer (excl. UKB) || ||	TRUE	igd	NA	NA	NA	NA	NA	NA	NA	11	17411821	0.0017	1.369e-09	747074	BMI_strict	TRUE	reported	HKLPXU	textfile	2	1	TRUE
	rs2112347	T	G	T	G	0.0276	0.0209248	0.6298	0.636138	FALSE	FALSE	FALSE	ieu-b-5125	5	75015242	0.0358817	NA	0.559786	LA_noukb	Laryngeal cancer (excl. UKB)	Laryngeal cancer (excl. UKB) || ||	TRUE	igd	NA	NA	NA	NA	NA	NA	NA	5	75015242	0.0017	1.173e-61	806699	BMI_strict	TRUE	reported	HKLPXU	textfile	2	1	TRUE
	rs2134858	T	C	T	C	-0.0117	-0.0409276	0.5119	0.522488	FALSE	FALSE	FALSE	ieu-b-5125	9	73837155	0.034011	NA	0.228835	LA_noukb	Laryngeal cancer (excl. UKB)	Laryngeal cancer (excl. UKB) || ||	TRUE	igd	NA	NA	NA	NA	NA	NA	NA	9	73837155	0.0017	5.869e-12	718696	BMI_strict	TRUE	reported	HKLPXU	textfile	2	1	TRUE
	rs213518	T	C	T	C	-0.0153	0.0101591	0.8498	0.85967	FALSE	FALSE	FALSE	ieu-b-5125	7	26941065	0.049721	NA	0.838101	LA_noukb	Laryngeal cancer (excl. UKB)	Laryngeal cancer (excl. UKB) || ||	TRUE	igd	NA	NA	NA	NA	NA	NA	NA	7	26941065	0.0024	2.492e-10	718433	BMI_strict	TRUE	reported	HKLPXU	textfile	2	1	TRUE
	rs214249	T	G	T	G	0.0138	-0.021286	0.6071	0.611038	FALSE	FALSE	FALSE	ieu-b-5125	16	348687	0.0350997	NA	0.544219	LA_noukb	Laryngeal cancer (excl. UKB)	Laryngeal cancer (excl. UKB) || ||	TRUE	igd	NA	NA	NA	NA	NA	NA	NA	16	348687	0.0017	2.715e-15	718521	BMI_strict	TRUE	reported	HKLPXU	textfile	2	1	TRUE
	rs215669	A	G	A	G	-0.0149	-0.0481246	0.6024	0.612676	FALSE	FALSE	FALSE	ieu-b-5125	7	32378979	0.0352132	NA	0.171731	LA_noukb	Laryngeal cancer (excl. UKB)	Laryngeal cancer (excl. UKB) || ||	TRUE	igd	NA	NA	NA	NA	NA	NA	NA	7	32378979	0.0017	8.938e-18	718120	BMI_strict	TRUE	reported	HKLPXU	textfile	2	1	TRUE
	rs217669	T	C	T	C	-0.0172	0.0676173	0.7224	0.735379	FALSE	FALSE	FALSE	ieu-b-5125	14	62360075	0.0390901	NA	0.08367	LA_noukb	Laryngeal cancer (excl. UKB)	Laryngeal cancer (excl. UKB) || ||	TRUE	igd	NA	NA	NA	NA	NA	NA	NA	14	62360075	0.0021	6.271e-16	484680	BMI_strict	TRUE	reported	HKLPXU	textfile	2	1	TRUE
	rs2192158	A	G	A	G	0.0137	-0.0263293	0.4492	0.453182	FALSE	FALSE	FALSE	ieu-b-5125	4	55505911	0.0343707	NA	0.443653	LA_noukb	Laryngeal cancer (excl. UKB)	Laryngeal cancer (excl. UKB) || ||	TRUE	igd	TRUE	rs2192158	rs12499367	A	G	C	T	4	55505360	0.0017	7.417e-16	718510	BMI_strict	TRUE	reported	HKLPXU	textfile	2	1	TRUE
	rs2196618	A	G	A	G	-0.0137	0.0143112	0.2634	0.27033	FALSE	FALSE	FALSE	ieu-b-5125	8	85089437	0.0389496	NA	0.7133	LA_noukb	Laryngeal cancer (excl. UKB)	Laryngeal cancer (excl. UKB) || ||	TRUE	igd	NA	NA	NA	NA	NA	NA	NA	8	85089437	0.0019	1.492e-12	718304	BMI_strict	TRUE	reported	HKLPXU	textfile	2	1	TRUE
	rs2206277	T	C	T	C	0.0408	-0.0333035	0.1557	0.188425	FALSE	FALSE	FALSE	ieu-b-5125	6	50798526	0.0431489	NA	0.440217	LA_noukb	Laryngeal cancer (excl. UKB)	Laryngeal cancer (excl. UKB) || ||	TRUE	igd	NA	NA	NA	NA	NA	NA	NA	6	50798526	0.0021	1.822e-83	806768	BMI_strict	TRUE	reported	HKLPXU	textfile	2	1	TRUE
	rs2228213	A	G	A	G	-0.0144	-0.00853967	0.3374	0.352766	FALSE	FALSE	FALSE	ieu-b-5125	6	12124855	0.0353908	NA	0.809326	LA_noukb	Laryngeal cancer (excl. UKB)	Laryngeal cancer (excl. UKB) || ||	TRUE	igd	NA	NA	NA	NA	NA	NA	NA	6	12124855	0.0017	5.498e-17	806782	BMI_strict	TRUE	reported	HKLPXU	textfile	2	1	TRUE
	rs2228552	T	G	T	G	0.0124	0.00426481	0.5663	0.643241	FALSE	FALSE	FALSE	ieu-b-5125	1	32165495	0.0355644	NA	0.904548	LA_noukb	Laryngeal cancer (excl. UKB)	Laryngeal cancer (excl. UKB) || ||	TRUE	igd	NA	NA	NA	NA	NA	NA	NA	1	32165495	0.0019	1.795e-11	588348	BMI_strict	TRUE	reported	HKLPXU	textfile	2	1	TRUE
	rs2241423	A	G	A	G	-0.0298	0.0421015	0.2285	0.212823	FALSE	FALSE	FALSE	ieu-b-5125	15	68086838	0.0413719	NA	0.308852	LA_noukb	Laryngeal cancer (excl. UKB)	Laryngeal cancer (excl. UKB) || ||	TRUE	igd	NA	NA	NA	NA	NA	NA	NA	15	68086838	0.0019	3.602e-54	806797	BMI_strict	TRUE	reported	HKLPXU	textfile	2	1	TRUE
	rs2246012	T	C	T	C	-0.0161	-0.076962	0.8512	0.836303	FALSE	FALSE	FALSE	ieu-b-5125	6	131898208	0.0455805	NA	0.0913188	LA_noukb	Laryngeal cancer (excl. UKB)	Laryngeal cancer (excl. UKB) || ||	TRUE	igd	NA	NA	NA	NA	NA	NA	NA	6	131898208	0.0022	1.154e-13	806786	BMI_strict	TRUE	reported	HKLPXU	textfile	2	1	TRUE
	rs2257791	A	G	A	G	-0.0139	0.0405971	0.756	0.727348	FALSE	FALSE	FALSE	ieu-b-5125	10	118665788	0.0391617	NA	0.299897	LA_noukb	Laryngeal cancer (excl. UKB)	Laryngeal cancer (excl. UKB) || ||	TRUE	igd	TRUE	rs2257791	rs2531689	G	A	G	A	10	118643670	0.002	1.631e-12	718675	BMI_strict	TRUE	reported	HKLPXU	textfile	2	1	TRUE
	rs225882	T	C	T	C	0.0113	0.0524012	0.7513	0.726631	FALSE	FALSE	FALSE	ieu-b-5125	14	30480123	0.0391525	NA	0.18077	LA_noukb	Laryngeal cancer (excl. UKB)	Laryngeal cancer (excl. UKB) || ||	TRUE	igd	NA	NA	NA	NA	NA	NA	NA	14	30480123	0.0018	8.564e-10	806807	BMI_strict	TRUE	reported	HKLPXU	textfile	2	1	TRUE
	rs2267958	A	G	A	G	-0.013	0.0132318	0.5088	0.505186	FALSE	FALSE	FALSE	ieu-b-5125	9	131015279	0.0362037	NA	0.714751	LA_noukb	Laryngeal cancer (excl. UKB)	Laryngeal cancer (excl. UKB) || ||	TRUE	igd	NA	NA	NA	NA	NA	NA	NA	9	131015279	0.0018	2.013e-13	710694	BMI_strict	TRUE	reported	HKLPXU	textfile	2	1	TRUE
	rs2271046	A	T	A	T	-0.0115	-0.0428373	0.6948	0.733877	FALSE	TRUE	FALSE	ieu-b-5125	4	52752812	0.0395647	NA	0.278935	LA_noukb	Laryngeal cancer (excl. UKB)	Laryngeal cancer (excl. UKB) || ||	TRUE	igd	NA	NA	NA	NA	NA	NA	NA	4	52752812	0.0018	3.031e-10	718692	BMI_strict	TRUE	reported	HKLPXU	textfile	2	1	TRUE
	rs2273175	T	C	T	C	-0.0121	-0.0502614	0.6791	0.673567	FALSE	FALSE	FALSE	ieu-b-5125	14	104160141	0.0358453	NA	0.160863	LA_noukb	Laryngeal cancer (excl. UKB)	Laryngeal cancer (excl. UKB) || ||	TRUE	igd	NA	NA	NA	NA	NA	NA	NA	14	104160141	0.0018	3.69e-11	718683	BMI_strict	TRUE	reported	HKLPXU	textfile	2	1	TRUE
	rs2275003	A	G	A	G	0.0111	-0.0192473	0.5007	0.474298	FALSE	FALSE	FALSE	ieu-b-5125	9	34124860	0.0340145	NA	0.571492	LA_noukb	Laryngeal cancer (excl. UKB)	Laryngeal cancer (excl. UKB) || ||	TRUE	igd	NA	NA	NA	NA	NA	NA	NA	9	34124860	0.0016	9.438e-12	806747	BMI_strict	TRUE	reported	HKLPXU	textfile	2	1	TRUE
	rs2281819	A	T	A	T	-0.0154	0.0408272	0.2293	0.22901	FALSE	TRUE	FALSE	ieu-b-5125	6	33771673	0.0403723	NA	0.311888	LA_noukb	Laryngeal cancer (excl. UKB)	Laryngeal cancer (excl. UKB) || ||	TRUE	igd	NA	NA	NA	NA	NA	NA	NA	6	33771673	0.002	2.088e-14	717097	BMI_strict	TRUE	reported	HKLPXU	textfile	2	1	TRUE
	rs2283006	A	G	A	G	0.0132	0.0169023	0.4881	0.490581	FALSE	FALSE	FALSE	ieu-b-5125	7	93085722	0.0346589	NA	0.62578	LA_noukb	Laryngeal cancer (excl. UKB)	Laryngeal cancer (excl. UKB) || ||	TRUE	igd	NA	NA	NA	NA	NA	NA	NA	7	93085722	0.0017	8.055e-15	717331	BMI_strict	TRUE	reported	HKLPXU	textfile	2	1	TRUE
	rs2289379	T	C	T	C	-0.0137	-0.0175102	0.3917	0.39584	FALSE	FALSE	FALSE	ieu-b-5125	7	44804225	0.0350344	NA	0.617216	LA_noukb	Laryngeal cancer (excl. UKB)	Laryngeal cancer (excl. UKB) || ||	TRUE	igd	NA	NA	NA	NA	NA	NA	NA	7	44804225	0.0018	7.019e-15	715836	BMI_strict	TRUE	reported	HKLPXU	textfile	2	1	TRUE
	rs2342892	T	G	T	G	0.0126	0.00654299	0.4855	0.492421	FALSE	FALSE	FALSE	ieu-b-5125	16	24540806	0.0341618	NA	0.848111	LA_noukb	Laryngeal cancer (excl. UKB)	Laryngeal cancer (excl. UKB) || ||	TRUE	igd	NA	NA	NA	NA	NA	NA	NA	16	24540806	0.0017	1.328e-13	714485	BMI_strict	TRUE	reported	HKLPXU	textfile	2	1	TRUE
	rs2357760	A	G	A	G	0.0143	0.0591922	0.6735	0.67353	FALSE	FALSE	FALSE	ieu-b-5125	6	120213880	0.0362994	NA	0.102961	LA_noukb	Laryngeal cancer (excl. UKB)	Laryngeal cancer (excl. UKB) || ||	TRUE	igd	NA	NA	NA	NA	NA	NA	NA	6	120213880	0.0017	2.106e-16	806795	BMI_strict	TRUE	reported	HKLPXU	textfile	2	1	TRUE
	rs2365389	T	C	T	C	-0.0168	-0.0046796	0.3999	0.40975	FALSE	FALSE	FALSE	ieu-b-5125	3	61236462	0.0347029	NA	0.892732	LA_noukb	Laryngeal cancer (excl. UKB)	Laryngeal cancer (excl. UKB) || ||	TRUE	igd	NA	NA	NA	NA	NA	NA	NA	3	61236462	0.0016	6.494e-25	801448	BMI_strict	TRUE	reported	HKLPXU	textfile	2	1	TRUE
	rs2396625	A	T	A	T	-0.0176	-0.0179316	0.4183	0.423633	FALSE	TRUE	TRUE	ieu-b-5125	7	113028634	0.0346431	NA	0.604731	LA_noukb	Laryngeal cancer (excl. UKB)	Laryngeal cancer (excl. UKB) || ||	TRUE	igd	NA	NA	NA	NA	NA	NA	NA	7	113028634	0.0017	2.805e-24	718567	BMI_strict	TRUE	reported	HKLPXU	textfile	2	1	FALSE
	rs2400414	T	C	T	C	-0.0126	-0.0424737	0.3461	0.360679	FALSE	FALSE	FALSE	ieu-b-5125	1	194965200	0.0354828	NA	0.231298	LA_noukb	Laryngeal cancer (excl. UKB)	Laryngeal cancer (excl. UKB) || ||	TRUE	igd	NA	NA	NA	NA	NA	NA	NA	1	194965200	0.0018	5.521e-13	718698	BMI_strict	TRUE	reported	HKLPXU	textfile	2	1	TRUE
	rs2436728	A	G	A	G	0.0189	-0.01827	0.4073	0.413014	FALSE	FALSE	FALSE	ieu-b-5125	6	40365601	0.0338584	NA	0.589473	LA_noukb	Laryngeal cancer (excl. UKB)	Laryngeal cancer (excl. UKB) || ||	TRUE	igd	NA	NA	NA	NA	NA	NA	NA	6	40365601	0.0017	1.969e-29	718640	BMI_strict	TRUE	reported	HKLPXU	textfile	2	1	TRUE
	rs2439823	A	G	A	G	-0.0165	-0.0144933	0.4514	0.457112	FALSE	FALSE	FALSE	ieu-b-5125	10	99778226	0.0344064	NA	0.673581	LA_noukb	Laryngeal cancer (excl. UKB)	Laryngeal cancer (excl. UKB) || ||	TRUE	igd	NA	NA	NA	NA	NA	NA	NA	10	99778226	0.0017	6.513e-22	718034	BMI_strict	TRUE	reported	HKLPXU	textfile	2	1	TRUE
	rs2466103	T	G	T	G	-0.0121	0.0424241	0.6928	0.703827	FALSE	FALSE	FALSE	ieu-b-5125	8	32412304	0.0372256	NA	0.254434	LA_noukb	Laryngeal cancer (excl. UKB)	Laryngeal cancer (excl. UKB) || ||	TRUE	igd	NA	NA	NA	NA	NA	NA	NA	8	32412304	0.0018	8.004e-12	802631	BMI_strict	TRUE	reported	HKLPXU	textfile	2	1	TRUE
	rs2470893	T	C	T	C	0.0107	-0.00830072	0.3049	0.319615	FALSE	FALSE	FALSE	ieu-b-5125	15	75019449	0.0366033	NA	0.820598	LA_noukb	Laryngeal cancer (excl. UKB)	Laryngeal cancer (excl. UKB) || ||	TRUE	igd	NA	NA	NA	NA	NA	NA	NA	15	75019449	0.0017	9.43e-10	803692	BMI_strict	TRUE	reported	HKLPXU	textfile	2	1	TRUE
	rs2503185	A	G	A	G	0.013	0.0884128	0.5097	0.528594	FALSE	FALSE	FALSE	ieu-b-5125	1	66461401	0.0342071	NA	0.00974833	LA_noukb	Laryngeal cancer (excl. UKB)	Laryngeal cancer (excl. UKB) || ||	TRUE	igd	NA	NA	NA	NA	NA	NA	NA	1	66461401	0.0017	1.327e-14	717297	BMI_strict	TRUE	reported	HKLPXU	textfile	2	1	TRUE
	rs2513999	A	G	A	G	-0.0154	-0.000418403	0.1593	0.1538	FALSE	FALSE	FALSE	ieu-b-5125	11	103019633	0.0483903	NA	0.993101	LA_noukb	Laryngeal cancer (excl. UKB)	Laryngeal cancer (excl. UKB) || ||	TRUE	igd	NA	NA	NA	NA	NA	NA	NA	11	103019633	0.0026	3.066e-09	484680	BMI_strict	TRUE	reported	HKLPXU	textfile	2	1	TRUE
	rs2600226	T	C	T	C	-0.0116	0.0238975	0.6712	0.668828	FALSE	FALSE	FALSE	ieu-b-5125	3	12928762	0.036876	NA	0.516952	LA_noukb	Laryngeal cancer (excl. UKB)	Laryngeal cancer (excl. UKB) || ||	TRUE	igd	NA	NA	NA	NA	NA	NA	NA	3	12928762	0.0018	1.423e-10	718538	BMI_strict	TRUE	reported	HKLPXU	textfile	2	1	TRUE
	rs2605603	A	G	A	G	-0.0103	-0.0148944	0.4812	0.487984	FALSE	FALSE	FALSE	ieu-b-5125	11	93221105	0.0338476	NA	0.659906	LA_noukb	Laryngeal cancer (excl. UKB)	Laryngeal cancer (excl. UKB) || ||	TRUE	igd	NA	NA	NA	NA	NA	NA	NA	11	93221105	0.0016	2.041e-10	806679	BMI_strict	TRUE	reported	HKLPXU	textfile	2	1	TRUE
	rs2622274	T	G	T	G	-0.0107	0.0318735	0.4553	0.438351	FALSE	FALSE	FALSE	ieu-b-5125	6	64240516	0.0344175	NA	0.354401	LA_noukb	Laryngeal cancer (excl. UKB)	Laryngeal cancer (excl. UKB) || ||	TRUE	igd	NA	NA	NA	NA	NA	NA	NA	6	64240516	0.0017	3.23e-10	718675	BMI_strict	TRUE	reported	HKLPXU	textfile	2	1	TRUE
	rs264941	A	C	A	C	-0.0124	-0.087113	0.4679	0.460653	FALSE	FALSE	FALSE	ieu-b-5125	2	104297420	0.0340972	NA	0.0106236	LA_noukb	Laryngeal cancer (excl. UKB)	Laryngeal cancer (excl. UKB) || ||	TRUE	igd	NA	NA	NA	NA	NA	NA	NA	2	104297420	0.0017	1.836e-13	718689	BMI_strict	TRUE	reported	HKLPXU	textfile	2	1	TRUE
	rs2715423	A	G	A	G	-0.0115	0.0331425	0.2805	0.286559	FALSE	FALSE	FALSE	ieu-b-5125	15	99511873	0.0377826	NA	0.380383	LA_noukb	Laryngeal cancer (excl. UKB)	Laryngeal cancer (excl. UKB) || ||	TRUE	igd	NA	NA	NA	NA	NA	NA	NA	15	99511873	0.0019	1.901e-09	706401	BMI_strict	TRUE	reported	HKLPXU	textfile	2	1	TRUE
	rs273512	T	C	T	C	0.0156	-0.0103644	0.409	0.411036	FALSE	FALSE	FALSE	ieu-b-5125	19	18224729	0.0346939	NA	0.765138	LA_noukb	Laryngeal cancer (excl. UKB)	Laryngeal cancer (excl. UKB) || ||	TRUE	igd	NA	NA	NA	NA	NA	NA	NA	19	18224729	0.0018	4.477e-19	718525	BMI_strict	TRUE	reported	HKLPXU	textfile	2	1	TRUE
	rs2744974	T	C	T	C	0.0261	-0.029255	0.3239	0.33187	FALSE	FALSE	FALSE	ieu-b-5125	6	34579431	0.0361424	NA	0.418264	LA_noukb	Laryngeal cancer (excl. UKB)	Laryngeal cancer (excl. UKB) || ||	TRUE	igd	NA	NA	NA	NA	NA	NA	NA	6	34579431	0.0017	1.275e-51	804150	BMI_strict	TRUE	reported	HKLPXU	textfile	2	1	TRUE
	rs2777768	A	G	A	G	0.0119	0.0153765	0.7228	0.73418	FALSE	FALSE	FALSE	ieu-b-5125	9	84186734	0.0386424	NA	0.690691	LA_noukb	Laryngeal cancer (excl. UKB)	Laryngeal cancer (excl. UKB) || ||	TRUE	igd	NA	NA	NA	NA	NA	NA	NA	9	84186734	0.0019	6.377e-10	718589	BMI_strict	TRUE	reported	HKLPXU	textfile	2	1	TRUE
	rs2820295	A	G	A	G	0.0235	0.0309675	0.3266	0.337219	FALSE	FALSE	FALSE	ieu-b-5125	1	201800868	0.0355031	NA	0.383073	LA_noukb	Laryngeal cancer (excl. UKB)	Laryngeal cancer (excl. UKB) || ||	TRUE	igd	NA	NA	NA	NA	NA	NA	NA	1	201800868	0.0018	5.556e-39	718545	BMI_strict	TRUE	reported	HKLPXU	textfile	2	1	TRUE
	rs2832283	A	G	A	G	0.0115	0.0372886	0.2254	0.221596	FALSE	FALSE	FALSE	ieu-b-5125	21	30690558	0.0408008	NA	0.36076	LA_noukb	Laryngeal cancer (excl. UKB)	Laryngeal cancer (excl. UKB) || ||	TRUE	igd	NA	NA	NA	NA	NA	NA	NA	21	30690558	0.002	4.718e-09	806772	BMI_strict	TRUE	reported	HKLPXU	textfile	2	1	TRUE
	rs28350	A	G	A	G	0.0172	0.00832237	0.1717	0.800125	FALSE	FALSE	FALSE	ieu-b-5125	3	42425059	0.0442022	NA	0.850657	LA_noukb	Laryngeal cancer (excl. UKB)	Laryngeal cancer (excl. UKB) || ||	TRUE	igd	TRUE	rs28350	rs33494	A	G	C	G	3	42418446	0.0022	1.074e-14	717783	BMI_strict	TRUE	reported	HKLPXU	textfile	2	1	TRUE
	rs28489620	A	G	A	G	-0.0151	0.0492643	0.2818	0.297582	FALSE	FALSE	FALSE	ieu-b-5125	22	41804716	0.0371397	NA	0.184687	LA_noukb	Laryngeal cancer (excl. UKB)	Laryngeal cancer (excl. UKB) || ||	TRUE	igd	NA	NA	NA	NA	NA	NA	NA	22	41804716	0.0021	1.423e-12	484680	BMI_strict	TRUE	reported	HKLPXU	textfile	2	1	TRUE
	rs2861089	A	T	A	T	0.0105	0.0191865	0.3806	0.375408	FALSE	TRUE	FALSE	ieu-b-5125	5	164557954	0.0351515	NA	0.585189	LA_noukb	Laryngeal cancer (excl. UKB)	Laryngeal cancer (excl. UKB) || ||	TRUE	igd	NA	NA	NA	NA	NA	NA	NA	5	164557954	0.0017	1.549e-09	718566	BMI_strict	TRUE	reported	HKLPXU	textfile	2	1	TRUE
	rs2861685	T	C	T	C	0.0165	-0.00449847	0.5864	0.593955	FALSE	FALSE	FALSE	ieu-b-5125	2	67837553	0.0344523	NA	0.896115	LA_noukb	Laryngeal cancer (excl. UKB)	Laryngeal cancer (excl. UKB) || ||	TRUE	igd	NA	NA	NA	NA	NA	NA	NA	2	67837553	0.0019	7.823e-18	484680	BMI_strict	TRUE	reported	HKLPXU	textfile	2	1	TRUE
	rs2862996	T	G	T	G	-0.0216	-0.0168212	0.7012	0.696078	FALSE	FALSE	FALSE	ieu-b-5125	11	43653833	0.0367717	NA	0.647347	LA_noukb	Laryngeal cancer (excl. UKB)	Laryngeal cancer (excl. UKB) || ||	TRUE	igd	NA	NA	NA	NA	NA	NA	NA	11	43653833	0.0017	3.604e-35	806675	BMI_strict	TRUE	reported	HKLPXU	textfile	2	1	TRUE
	rs2875762	C	G	C	G	0.0129	-0.0614241	0.252	0.236963	FALSE	TRUE	FALSE	ieu-b-5125	6	124925032	0.0404786	NA	0.129154	LA_noukb	Laryngeal cancer (excl. UKB)	Laryngeal cancer (excl. UKB) || ||	TRUE	igd	NA	NA	NA	NA	NA	NA	NA	6	124925032	0.002	1.066e-10	717481	BMI_strict	TRUE	reported	HKLPXU	textfile	2	1	TRUE
	rs2907948	A	G	A	G	-0.0145	0.0171702	0.244	0.235852	FALSE	FALSE	FALSE	ieu-b-5125	7	150638484	0.0398472	NA	0.66654	LA_noukb	Laryngeal cancer (excl. UKB)	Laryngeal cancer (excl. UKB) || ||	TRUE	igd	NA	NA	NA	NA	NA	NA	NA	7	150638484	0.0019	1.945e-14	806659	BMI_strict	TRUE	reported	HKLPXU	textfile	2	1	TRUE
	rs2910026	T	C	T	C	-0.0132	-0.0413099	0.7222	0.719511	FALSE	FALSE	FALSE	ieu-b-5125	5	152529936	0.0377873	NA	0.274297	LA_noukb	Laryngeal cancer (excl. UKB)	Laryngeal cancer (excl. UKB) || ||	TRUE	igd	NA	NA	NA	NA	NA	NA	NA	5	152529936	0.0021	5.688e-10	484680	BMI_strict	TRUE	reported	HKLPXU	textfile	2	1	TRUE
	rs2962334	T	G	T	G	0.0396	-0.107249	0.0272	0.0228002	FALSE	FALSE	FALSE	ieu-b-5125	5	86879056	0.117656	NA	0.36201	LA_noukb	Laryngeal cancer (excl. UKB)	Laryngeal cancer (excl. UKB) || ||	TRUE	igd	NA	NA	NA	NA	NA	NA	NA	5	86879056	0.0059	1.777e-11	715204	BMI_strict	TRUE	reported	HKLPXU	textfile	2	1	TRUE
	rs2984618	T	G	T	G	0.0165	-0.0379644	0.4408	0.404401	FALSE	FALSE	FALSE	ieu-b-5125	1	47690438	0.0347198	NA	0.274196	LA_noukb	Laryngeal cancer (excl. UKB)	Laryngeal cancer (excl. UKB) || ||	TRUE	igd	NA	NA	NA	NA	NA	NA	NA	1	47690438	0.0016	3.803e-24	806433	BMI_strict	TRUE	reported	HKLPXU	textfile	2	1	TRUE
	rs3101336	T	C	T	C	-0.0254	0.00739076	0.3825	0.388759	FALSE	FALSE	FALSE	ieu-b-5125	1	72751185	0.0348334	NA	0.831971	LA_noukb	Laryngeal cancer (excl. UKB)	Laryngeal cancer (excl. UKB) || ||	TRUE	igd	NA	NA	NA	NA	NA	NA	NA	1	72751185	0.0016	4.804e-54	801552	BMI_strict	TRUE	reported	HKLPXU	textfile	2	1	TRUE
	rs3115667	T	C	T	C	-0.0179	0.00600832	0.2821	0.25939	FALSE	FALSE	FALSE	ieu-b-5125	6	31643399	0.0389138	NA	0.877294	LA_noukb	Laryngeal cancer (excl. UKB)	Laryngeal cancer (excl. UKB) || ||	TRUE	igd	NA	NA	NA	NA	NA	NA	NA	6	31643399	0.0019	5.924e-21	717285	BMI_strict	TRUE	reported	HKLPXU	textfile	2	1	TRUE
	rs312750	A	G	A	G	0.0097	0.017965	0.4986	0.482942	FALSE	FALSE	FALSE	ieu-b-5125	17	68343539	0.0339017	NA	0.596171	LA_noukb	Laryngeal cancer (excl. UKB)	Laryngeal cancer (excl. UKB) || ||	TRUE	igd	NA	NA	NA	NA	NA	NA	NA	17	68343539	0.0016	2.565e-09	806739	BMI_strict	TRUE	reported	HKLPXU	textfile	2	1	TRUE
	rs321237	A	G	A	G	0.0126	-0.0158668	0.7498	0.740979	FALSE	FALSE	FALSE	ieu-b-5125	1	96478125	0.03888	NA	0.683203	LA_noukb	Laryngeal cancer (excl. UKB)	Laryngeal cancer (excl. UKB) || ||	TRUE	igd	NA	NA	NA	NA	NA	NA	NA	1	96478125	0.002	1.488e-10	718362	BMI_strict	TRUE	reported	HKLPXU	textfile	2	1	TRUE
	rs326893	T	C	T	C	0.0121	-0.0608163	0.5812	0.606892	FALSE	FALSE	FALSE	ieu-b-5125	4	112691776	0.0348993	NA	0.0813992	LA_noukb	Laryngeal cancer (excl. UKB)	Laryngeal cancer (excl. UKB) || ||	TRUE	igd	NA	NA	NA	NA	NA	NA	NA	4	112691776	0.0017	1.893e-12	718672	BMI_strict	TRUE	reported	HKLPXU	textfile	2	1	TRUE
	rs337637	A	G	A	G	-0.0137	-0.00348329	0.359	0.343639	FALSE	FALSE	FALSE	ieu-b-5125	4	38604470	0.0360934	NA	0.923117	LA_noukb	Laryngeal cancer (excl. UKB)	Laryngeal cancer (excl. UKB) || ||	TRUE	igd	NA	NA	NA	NA	NA	NA	NA	4	38604470	0.0017	6.237e-16	806528	BMI_strict	TRUE	reported	HKLPXU	textfile	2	1	TRUE
	rs339991	A	G	A	G	-0.0125	0.0522017	0.4201	0.4339	FALSE	FALSE	FALSE	ieu-b-5125	15	60913637	0.0342848	NA	0.127862	LA_noukb	Laryngeal cancer (excl. UKB)	Laryngeal cancer (excl. UKB) || ||	TRUE	igd	NA	NA	NA	NA	NA	NA	NA	15	60913637	0.0017	3.514e-13	717095	BMI_strict	TRUE	reported	HKLPXU	textfile	2	1	TRUE
	rs34184235	T	C	T	C	-0.0115	0.0327258	0.4353	0.436963	FALSE	FALSE	FALSE	ieu-b-5125	3	86192846	0.0343431	NA	0.340637	LA_noukb	Laryngeal cancer (excl. UKB)	Laryngeal cancer (excl. UKB) || ||	TRUE	igd	NA	NA	NA	NA	NA	NA	NA	3	86192846	0.0019	2.143e-09	484680	BMI_strict	TRUE	reported	HKLPXU	textfile	2	1	TRUE
	rs34234296	A	G	A	G	-0.0145	0.00334153	0.3876	0.375509	FALSE	FALSE	FALSE	ieu-b-5125	2	175166636	0.0354838	NA	0.924974	LA_noukb	Laryngeal cancer (excl. UKB)	Laryngeal cancer (excl. UKB) || ||	TRUE	igd	NA	NA	NA	NA	NA	NA	NA	2	175166636	0.002	2.011e-13	484680	BMI_strict	TRUE	reported	HKLPXU	textfile	2	1	TRUE
	rs34517439	A	C	A	C	0.0391	0.0116295	0.1168	0.12101	FALSE	FALSE	FALSE	ieu-b-5125	1	78450517	0.0519865	NA	0.822989	LA_noukb	Laryngeal cancer (excl. UKB)	Laryngeal cancer (excl. UKB) || ||	TRUE	igd	NA	NA	NA	NA	NA	NA	NA	1	78450517	0.003	3.403e-39	484680	BMI_strict	TRUE	reported	HKLPXU	textfile	2	1	TRUE
	rs34811474	A	G	A	G	-0.0293	0.0319604	0.2224	0.223269	FALSE	FALSE	FALSE	ieu-b-5125	4	25408838	0.0424178	NA	0.451169	LA_noukb	Laryngeal cancer (excl. UKB)	Laryngeal cancer (excl. UKB) || ||	TRUE	igd	NA	NA	NA	NA	NA	NA	NA	4	25408838	0.0023	8.504e-38	484680	BMI_strict	TRUE	reported	HKLPXU	textfile	2	1	TRUE
	rs349088	A	C	A	C	-0.013	-0.00614975	0.4777	0.499918	FALSE	FALSE	FALSE	ieu-b-5125	11	84814393	0.0338741	NA	0.855938	LA_noukb	Laryngeal cancer (excl. UKB)	Laryngeal cancer (excl. UKB) || ||	TRUE	igd	NA	NA	NA	NA	NA	NA	NA	11	84814393	0.0017	3.501e-14	718429	BMI_strict	TRUE	reported	HKLPXU	textfile	2	1	TRUE
	rs35483388	T	C	T	C	0.0125	0.0394749	0.3794	0.38563	FALSE	FALSE	FALSE	ieu-b-5125	11	122545146	0.0351954	NA	0.262036	LA_noukb	Laryngeal cancer (excl. UKB)	Laryngeal cancer (excl. UKB) || ||	TRUE	igd	NA	NA	NA	NA	NA	NA	NA	11	122545146	0.002	2.607e-10	484680	BMI_strict	TRUE	reported	HKLPXU	textfile	2	1	TRUE
	rs355777	C	G	C	G	0.0151	-0.033839	0.3984	0.409486	FALSE	TRUE	FALSE	ieu-b-5125	3	154034950	0.034945	NA	0.332869	LA_noukb	Laryngeal cancer (excl. UKB)	Laryngeal cancer (excl. UKB) || ||	TRUE	igd	NA	NA	NA	NA	NA	NA	NA	3	154034950	0.0017	2.129e-18	718342	BMI_strict	TRUE	reported	HKLPXU	textfile	2	1	TRUE
	rs35867081	A	G	A	G	0.015	0.0011283	0.4871	0.492455	FALSE	FALSE	FALSE	ieu-b-5125	17	79047278	0.0346139	NA	0.973996	LA_noukb	Laryngeal cancer (excl. UKB)	Laryngeal cancer (excl. UKB) || ||	TRUE	igd	NA	NA	NA	NA	NA	NA	NA	17	79047278	0.0019	6.648e-15	484680	BMI_strict	TRUE	reported	HKLPXU	textfile	2	1	TRUE
	rs35949039	T	G	T	G	-0.0215	-0.0361331	0.1056	0.107994	FALSE	FALSE	FALSE	ieu-b-5125	16	70572605	0.0562571	NA	0.520689	LA_noukb	Laryngeal cancer (excl. UKB)	Laryngeal cancer (excl. UKB) || ||	TRUE	igd	NA	NA	NA	NA	NA	NA	NA	16	70572605	0.0031	6.297e-12	484680	BMI_strict	TRUE	reported	HKLPXU	textfile	2	1	TRUE
	rs3796432	T	G	T	G	-0.0113	-0.0364826	0.3672	0.36211	FALSE	FALSE	FALSE	ieu-b-5125	4	96030402	0.0351189	NA	0.298883	LA_noukb	Laryngeal cancer (excl. UKB)	Laryngeal cancer (excl. UKB) || ||	TRUE	igd	NA	NA	NA	NA	NA	NA	NA	4	96030402	0.0018	2.214e-10	718567	BMI_strict	TRUE	reported	HKLPXU	textfile	2	1	TRUE
	rs3806114	A	G	A	G	-0.012	-0.0268504	0.6916	0.672511	FALSE	FALSE	FALSE	ieu-b-5125	6	20482335	0.0369906	NA	0.467918	LA_noukb	Laryngeal cancer (excl. UKB)	Laryngeal cancer (excl. UKB) || ||	TRUE	igd	NA	NA	NA	NA	NA	NA	NA	6	20482335	0.0018	1.459e-11	804965	BMI_strict	TRUE	reported	HKLPXU	textfile	2	1	TRUE
	rs3808477	T	C	T	C	-0.0182	0.0234065	0.274	0.274791	FALSE	FALSE	FALSE	ieu-b-5125	8	116670347	0.0383198	NA	0.541317	LA_noukb	Laryngeal cancer (excl. UKB)	Laryngeal cancer (excl. UKB) || ||	TRUE	igd	NA	NA	NA	NA	NA	NA	NA	8	116670347	0.0019	8.726e-22	718439	BMI_strict	TRUE	reported	HKLPXU	textfile	2	1	TRUE
	rs3814883	T	C	T	C	0.0227	0.00328259	0.4795	0.455863	FALSE	FALSE	FALSE	ieu-b-5125	16	29994922	0.0356478	NA	0.926631	LA_noukb	Laryngeal cancer (excl. UKB)	Laryngeal cancer (excl. UKB) || ||	TRUE	igd	NA	NA	NA	NA	NA	NA	NA	16	29994922	0.0017	1.471e-40	717877	BMI_strict	TRUE	reported	HKLPXU	textfile	2	1	TRUE
	rs3825061	T	C	T	C	0.014	0.0126504	0.3863	0.386801	FALSE	FALSE	FALSE	ieu-b-5125	11	118944675	0.0351958	NA	0.719275	LA_noukb	Laryngeal cancer (excl. UKB)	Laryngeal cancer (excl. UKB) || ||	TRUE	igd	NA	NA	NA	NA	NA	NA	NA	11	118944675	0.0017	6.149e-16	718354	BMI_strict	TRUE	reported	HKLPXU	textfile	2	1	TRUE
	rs3902951	T	G	T	G	-0.0134	-0.0670316	0.7691	0.746402	FALSE	FALSE	FALSE	ieu-b-5125	14	69789755	0.0389759	NA	0.0854653	LA_noukb	Laryngeal cancer (excl. UKB)	Laryngeal cancer (excl. UKB) || ||	TRUE	igd	NA	NA	NA	NA	NA	NA	NA	14	69789755	0.0019	2.883e-12	794335	BMI_strict	TRUE	reported	HKLPXU	textfile	2	1	TRUE
	rs3923783	A	C	A	C	-0.0222	0.014892	0.1784	0.181078	FALSE	FALSE	FALSE	ieu-b-5125	17	1843189	0.0446027	NA	0.738469	LA_noukb	Laryngeal cancer (excl. UKB)	Laryngeal cancer (excl. UKB) || ||	TRUE	igd	NA	NA	NA	NA	NA	NA	NA	17	1843189	0.0022	4.121e-23	714524	BMI_strict	TRUE	reported	HKLPXU	textfile	2	1	TRUE
	rs39654	A	G	A	G	-0.0163	-0.0319047	0.4513	0.460685	FALSE	FALSE	FALSE	ieu-b-5125	3	173095123	0.0349133	NA	0.360808	LA_noukb	Laryngeal cancer (excl. UKB)	Laryngeal cancer (excl. UKB) || ||	TRUE	igd	NA	NA	NA	NA	NA	NA	NA	3	173095123	0.0017	1.745e-21	717812	BMI_strict	TRUE	reported	HKLPXU	textfile	2	1	TRUE
	rs40067	A	G	A	G	-0.0252	0.0252411	0.1701	0.164092	FALSE	FALSE	FALSE	ieu-b-5125	5	107439012	0.0460894	NA	0.583929	LA_noukb	Laryngeal cancer (excl. UKB)	Laryngeal cancer (excl. UKB) || ||	TRUE	igd	NA	NA	NA	NA	NA	NA	NA	5	107439012	0.0023	9.728e-29	714059	BMI_strict	TRUE	reported	HKLPXU	textfile	2	1	TRUE
	rs4017425	T	C	T	C	-0.0118	-0.0102083	0.4676	0.466586	FALSE	FALSE	FALSE	ieu-b-5125	3	44028764	0.0341539	NA	0.765022	LA_noukb	Laryngeal cancer (excl. UKB)	Laryngeal cancer (excl. UKB) || ||	TRUE	igd	NA	NA	NA	NA	NA	NA	NA	3	44028764	0.0017	2.911e-12	718438	BMI_strict	TRUE	reported	HKLPXU	textfile	2	1	TRUE
	rs4097319	T	G	T	G	0.0107	0.00557865	0.5641	0.575066	FALSE	FALSE	FALSE	ieu-b-5125	10	33860515	0.0345487	NA	0.871722	LA_noukb	Laryngeal cancer (excl. UKB)	Laryngeal cancer (excl. UKB) || ||	TRUE	igd	NA	NA	NA	NA	NA	NA	NA	10	33860515	0.0017	4.323e-10	718651	BMI_strict	TRUE	reported	HKLPXU	textfile	2	1	TRUE
	rs4148155	A	G	A	G	0.0192	0.0112738	0.8867	0.891105	FALSE	FALSE	FALSE	ieu-b-5125	4	89054667	0.0546227	NA	0.836483	LA_noukb	Laryngeal cancer (excl. UKB)	Laryngeal cancer (excl. UKB) || ||	TRUE	igd	NA	NA	NA	NA	NA	NA	NA	4	89054667	0.0026	1.339e-13	806326	BMI_strict	TRUE	reported	HKLPXU	textfile	2	1	TRUE
	rs4240673	T	C	T	C	0.0175	0.0288578	0.4545	0.451453	FALSE	FALSE	FALSE	ieu-b-5125	8	10787612	0.0339431	NA	0.395224	LA_noukb	Laryngeal cancer (excl. UKB)	Laryngeal cancer (excl. UKB) || ||	TRUE	igd	NA	NA	NA	NA	NA	NA	NA	8	10787612	0.0016	1.584e-26	806735	BMI_strict	TRUE	reported	HKLPXU	textfile	2	1	TRUE
	rs4256980	C	G	C	G	-0.0187	0.0116247	0.3305	0.352672	FALSE	TRUE	FALSE	ieu-b-5125	11	8673939	0.0355316	NA	0.743543	LA_noukb	Laryngeal cancer (excl. UKB)	Laryngeal cancer (excl. UKB) || ||	TRUE	igd	NA	NA	NA	NA	NA	NA	NA	11	8673939	0.0017	8.633e-29	804708	BMI_strict	TRUE	reported	HKLPXU	textfile	2	1	TRUE
	rs427943	A	C	A	C	-0.0177	0.0223113	0.4288	0.444624	FALSE	FALSE	FALSE	ieu-b-5125	21	46570896	0.0342874	NA	0.515231	LA_noukb	Laryngeal cancer (excl. UKB)	Laryngeal cancer (excl. UKB) || ||	TRUE	igd	NA	NA	NA	NA	NA	NA	NA	21	46570896	0.0017	3.603e-25	742360	BMI_strict	TRUE	reported	HKLPXU	textfile	2	1	TRUE
	rs4286488	A	G	A	G	0.0121	-0.0341992	0.7608	0.757852	FALSE	FALSE	FALSE	ieu-b-5125	4	94440026	0.0395733	NA	0.387479	LA_noukb	Laryngeal cancer (excl. UKB)	Laryngeal cancer (excl. UKB) || ||	TRUE	igd	NA	NA	NA	NA	NA	NA	NA	4	94440026	0.002	1.704e-09	718676	BMI_strict	TRUE	reported	HKLPXU	textfile	2	1	TRUE
	rs429358	T	C	T	C	0.0257	0.0355972	0.8459	0.859415	FALSE	FALSE	FALSE	ieu-b-5125	19	45411941	0.0497397	NA	0.474195	LA_noukb	Laryngeal cancer (excl. UKB)	Laryngeal cancer (excl. UKB) || ||	TRUE	igd	NA	NA	NA	NA	NA	NA	NA	19	45411941	0.0026	2.599e-22	484680	BMI_strict	TRUE	reported	HKLPXU	textfile	2	1	TRUE
	rs4303732	T	C	T	C	0.0169	-0.0248246	0.6137	0.604253	FALSE	FALSE	FALSE	ieu-b-5125	2	100830040	0.0348278	NA	0.475981	LA_noukb	Laryngeal cancer (excl. UKB)	Laryngeal cancer (excl. UKB) || ||	TRUE	igd	NA	NA	NA	NA	NA	NA	NA	2	100830040	0.0017	1.264e-22	718627	BMI_strict	TRUE	reported	HKLPXU	textfile	2	1	TRUE
	rs4307239	A	G	A	G	-0.0115	-0.0610965	0.5361	0.537135	FALSE	FALSE	FALSE	ieu-b-5125	7	24354300	0.0343243	NA	0.0750793	LA_noukb	Laryngeal cancer (excl. UKB)	Laryngeal cancer (excl. UKB) || ||	TRUE	igd	NA	NA	NA	NA	NA	NA	NA	7	24354300	0.0017	1.473e-11	717563	BMI_strict	TRUE	reported	HKLPXU	textfile	2	1	TRUE
	rs4482463	A	C	A	C	-0.031	0.122285	0.917	0.913225	FALSE	FALSE	FALSE	ieu-b-5125	2	205375909	0.0674531	NA	0.069849	LA_noukb	Laryngeal cancer (excl. UKB)	Laryngeal cancer (excl. UKB) || ||	TRUE	igd	NA	NA	NA	NA	NA	NA	NA	2	205375909	0.0031	4.848e-23	663850	BMI_strict	TRUE	reported	HKLPXU	textfile	2	1	TRUE
	rs4517716	C	G	C	G	-0.0117	-0.0401931	0.7924	0.798472	FALSE	TRUE	FALSE	ieu-b-5125	14	83013876	0.0427215	NA	0.3468	LA_noukb	Laryngeal cancer (excl. UKB)	Laryngeal cancer (excl. UKB) || ||	TRUE	igd	NA	NA	NA	NA	NA	NA	NA	14	83013876	0.002	4.27e-09	806706	BMI_strict	TRUE	reported	HKLPXU	textfile	2	1	TRUE
	rs45486197	A	G	A	G	0.0279	-0.0906205	0.0635	0.0629113	FALSE	FALSE	FALSE	ieu-b-5125	19	2244849	0.0747768	NA	0.225558	LA_noukb	Laryngeal cancer (excl. UKB)	Laryngeal cancer (excl. UKB) || ||	TRUE	igd	NA	NA	NA	NA	NA	NA	NA	19	2244849	0.004	1.801e-12	484680	BMI_strict	TRUE	reported	HKLPXU	textfile	2	1	TRUE
	rs459552	A	T	A	T	-0.0133	0.0229671	0.7747	0.759337	FALSE	TRUE	FALSE	ieu-b-5125	5	112176756	0.0408439	NA	0.573902	LA_noukb	Laryngeal cancer (excl. UKB)	Laryngeal cancer (excl. UKB) || ||	TRUE	igd	NA	NA	NA	NA	NA	NA	NA	5	112176756	0.0019	8.356e-12	797086	BMI_strict	TRUE	reported	HKLPXU	textfile	2	1	TRUE
	rs4653017	T	C	T	C	0.0118	-0.0592985	0.6679	0.674201	FALSE	FALSE	FALSE	ieu-b-5125	1	33776728	0.0365166	NA	0.104402	LA_noukb	Laryngeal cancer (excl. UKB)	Laryngeal cancer (excl. UKB) || ||	TRUE	igd	NA	NA	NA	NA	NA	NA	NA	1	33776728	0.0018	1.11e-10	716691	BMI_strict	TRUE	reported	HKLPXU	textfile	2	1	TRUE
	rs4655141	T	C	T	C	-0.0173	0.00528439	0.8362	0.834159	FALSE	FALSE	FALSE	ieu-b-5125	1	23312025	0.0453275	NA	0.907191	LA_noukb	Laryngeal cancer (excl. UKB)	Laryngeal cancer (excl. UKB) || ||	TRUE	igd	NA	NA	NA	NA	NA	NA	NA	1	23312025	0.0022	6.198e-15	718666	BMI_strict	TRUE	reported	HKLPXU	textfile	2	1	TRUE
	rs4700608	T	C	T	C	-0.0155	-0.0260531	0.5236	0.506334	FALSE	FALSE	FALSE	ieu-b-5125	5	63026280	0.0340276	NA	0.443887	LA_noukb	Laryngeal cancer (excl. UKB)	Laryngeal cancer (excl. UKB) || ||	TRUE	igd	NA	NA	NA	NA	NA	NA	NA	5	63026280	0.0017	4.324e-20	718693	BMI_strict	TRUE	reported	HKLPXU	textfile	2	1	TRUE
	rs4721089	T	C	T	C	0.0167	0.00895338	0.783	0.769062	FALSE	FALSE	FALSE	ieu-b-5125	7	1872921	0.0405501	NA	0.82525	LA_noukb	Laryngeal cancer (excl. UKB)	Laryngeal cancer (excl. UKB) || ||	TRUE	igd	NA	NA	NA	NA	NA	NA	NA	7	1872921	0.0023	5.596e-13	484680	BMI_strict	TRUE	reported	HKLPXU	textfile	2	1	TRUE
	rs4740383	A	G	A	G	0.0131	-0.0220377	0.4185	0.40302	FALSE	FALSE	FALSE	ieu-b-5125	9	133788361	0.0347574	NA	0.526052	LA_noukb	Laryngeal cancer (excl. UKB)	Laryngeal cancer (excl. UKB) || ||	TRUE	igd	TRUE	rs4740383	rs6597652	A	G	A	G	9	133783566	0.0018	7.028e-14	694837	BMI_strict	TRUE	reported	HKLPXU	textfile	2	1	TRUE
	rs4740619	T	C	T	C	0.0189	0.0391595	0.5436	0.560075	FALSE	FALSE	FALSE	ieu-b-5125	9	15634326	0.0344445	NA	0.255586	LA_noukb	Laryngeal cancer (excl. UKB)	Laryngeal cancer (excl. UKB) || ||	TRUE	igd	NA	NA	NA	NA	NA	NA	NA	9	15634326	0.0016	3.147e-31	806567	BMI_strict	TRUE	reported	HKLPXU	textfile	2	1	TRUE
	rs474605	A	G	A	G	-0.0125	0.0895479	0.4679	0.488333	FALSE	FALSE	FALSE	ieu-b-5125	18	39612720	0.0344871	NA	0.00941608	LA_noukb	Laryngeal cancer (excl. UKB)	Laryngeal cancer (excl. UKB) || ||	TRUE	igd	NA	NA	NA	NA	NA	NA	NA	18	39612720	0.0017	2.717e-13	718363	BMI_strict	TRUE	reported	HKLPXU	textfile	2	1	TRUE
	rs4771218	A	G	A	G	-0.0141	-0.0116605	0.6244	0.607728	FALSE	FALSE	FALSE	ieu-b-5125	13	28655311	0.0351686	NA	0.74022	LA_noukb	Laryngeal cancer (excl. UKB)	Laryngeal cancer (excl. UKB) || ||	TRUE	igd	NA	NA	NA	NA	NA	NA	NA	13	28655311	0.0018	3.18e-15	717363	BMI_strict	TRUE	reported	HKLPXU	textfile	2	1	TRUE
	rs478707	T	C	T	C	-0.015	-0.0698203	0.2032	0.192359	FALSE	FALSE	FALSE	ieu-b-5125	18	7543207	0.0433978	NA	0.10765	LA_noukb	Laryngeal cancer (excl. UKB)	Laryngeal cancer (excl. UKB) || ||	TRUE	igd	NA	NA	NA	NA	NA	NA	NA	18	7543207	0.0024	1.983e-10	484680	BMI_strict	TRUE	reported	HKLPXU	textfile	2	1	TRUE
	rs4812405	A	C	A	C	-0.0202	-0.0832124	0.0763	0.0702197	FALSE	FALSE	FALSE	ieu-b-5125	20	35276585	0.068501	NA	0.224457	LA_noukb	Laryngeal cancer (excl. UKB)	Laryngeal cancer (excl. UKB) || ||	TRUE	igd	NA	NA	NA	NA	NA	NA	NA	20	35276585	0.0033	1.279e-09	706013	BMI_strict	TRUE	reported	HKLPXU	textfile	2	1	TRUE
	rs4813619	T	G	T	G	-0.0106	-0.0724641	0.5305	0.512557	FALSE	FALSE	FALSE	ieu-b-5125	20	2815715	0.0344609	NA	0.0354838	LA_noukb	Laryngeal cancer (excl. UKB)	Laryngeal cancer (excl. UKB) || ||	TRUE	igd	NA	NA	NA	NA	NA	NA	NA	20	2815715	0.0018	1.695e-09	664186	BMI_strict	TRUE	reported	HKLPXU	textfile	2	1	TRUE
	rs4858193	T	C	T	C	0.0133	0.0111024	0.7199	0.722782	FALSE	FALSE	FALSE	ieu-b-5125	3	20441050	0.0381219	NA	0.770873	LA_noukb	Laryngeal cancer (excl. UKB)	Laryngeal cancer (excl. UKB) || ||	TRUE	igd	NA	NA	NA	NA	NA	NA	NA	3	20441050	0.0019	2.444e-12	718071	BMI_strict	TRUE	reported	HKLPXU	textfile	2	1	TRUE
	rs4864201	T	C	T	C	0.0137	-0.00814219	0.3471	0.34531	FALSE	FALSE	FALSE	ieu-b-5125	4	130731284	0.0357182	NA	0.81968	LA_noukb	Laryngeal cancer (excl. UKB)	Laryngeal cancer (excl. UKB) || ||	TRUE	igd	NA	NA	NA	NA	NA	NA	NA	4	130731284	0.0017	4.298e-16	806465	BMI_strict	TRUE	reported	HKLPXU	textfile	2	1	TRUE
	rs4880341	T	C	T	C	-0.013	0.00431505	0.5725	0.564934	FALSE	FALSE	FALSE	ieu-b-5125	10	133992689	0.0347295	NA	0.90112	LA_noukb	Laryngeal cancer (excl. UKB)	Laryngeal cancer (excl. UKB) || ||	TRUE	igd	NA	NA	NA	NA	NA	NA	NA	10	133992689	0.0017	3.059e-14	716038	BMI_strict	TRUE	reported	HKLPXU	textfile	2	1	TRUE
	rs4900714	T	G	T	G	0.015	0.00199637	0.4776	0.513549	FALSE	FALSE	FALSE	ieu-b-5125	14	47302219	0.0340339	NA	0.953224	LA_noukb	Laryngeal cancer (excl. UKB)	Laryngeal cancer (excl. UKB) || ||	TRUE	igd	NA	NA	NA	NA	NA	NA	NA	14	47302219	0.0017	1.001e-18	718662	BMI_strict	TRUE	reported	HKLPXU	textfile	2	1	TRUE
	rs4906263	C	G	C	G	-0.0176	0.0271311	0.6562	0.651294	FALSE	TRUE	FALSE	ieu-b-5125	14	103249127	0.0361615	NA	0.453088	LA_noukb	Laryngeal cancer (excl. UKB)	Laryngeal cancer (excl. UKB) || ||	TRUE	igd	NA	NA	NA	NA	NA	NA	NA	14	103249127	0.0018	8.106e-23	718534	BMI_strict	TRUE	reported	HKLPXU	textfile	2	1	TRUE
	rs4973618	A	G	A	G	-0.0148	0.00394333	0.6623	0.659039	FALSE	FALSE	FALSE	ieu-b-5125	2	229002620	0.0360518	NA	0.912901	LA_noukb	Laryngeal cancer (excl. UKB)	Laryngeal cancer (excl. UKB) || ||	TRUE	igd	NA	NA	NA	NA	NA	NA	NA	2	229002620	0.0018	1.252e-16	706944	BMI_strict	TRUE	reported	HKLPXU	textfile	2	1	TRUE
	rs4981693	A	G	A	G	0.0202	0.01038	0.7743	0.766511	FALSE	FALSE	FALSE	ieu-b-5125	14	29680331	0.0401321	NA	0.79591	LA_noukb	Laryngeal cancer (excl. UKB)	Laryngeal cancer (excl. UKB) || ||	TRUE	igd	NA	NA	NA	NA	NA	NA	NA	14	29680331	0.002	7.894e-24	718593	BMI_strict	TRUE	reported	HKLPXU	textfile	2	1	TRUE
	rs4986044	T	C	T	C	-0.0177	-0.0204907	0.455	0.458289	FALSE	FALSE	FALSE	ieu-b-5125	17	21261560	0.0345825	NA	0.553506	LA_noukb	Laryngeal cancer (excl. UKB)	Laryngeal cancer (excl. UKB) || ||	TRUE	igd	NA	NA	NA	NA	NA	NA	NA	17	21261560	0.0016	1.269e-27	802591	BMI_strict	TRUE	reported	HKLPXU	textfile	2	1	TRUE
	rs4988235	A	G	A	G	0.0124	0.0825645	0.7206	0.653943	FALSE	FALSE	FALSE	ieu-b-5125	2	136608646	0.0399777	NA	0.0388982	LA_noukb	Laryngeal cancer (excl. UKB)	Laryngeal cancer (excl. UKB) || ||	TRUE	igd	NA	NA	NA	NA	NA	NA	NA	2	136608646	0.0017	7.094e-13	796039	BMI_strict	TRUE	reported	HKLPXU	textfile	2	1	TRUE
	rs543874	A	G	A	G	-0.0479	0.0555329	0.7786	0.805842	FALSE	FALSE	FALSE	ieu-b-5125	1	177889480	0.0439159	NA	0.20604	LA_noukb	Laryngeal cancer (excl. UKB)	Laryngeal cancer (excl. UKB) || ||	TRUE	igd	NA	NA	NA	NA	NA	NA	NA	1	177889480	0.002	3.06e-125	806688	BMI_strict	TRUE	reported	HKLPXU	textfile	2	1	TRUE
	rs56151256	A	C	A	C	0.0166	0.0257214	0.7555	0.75732	FALSE	FALSE	FALSE	ieu-b-5125	15	78024806	0.0403962	NA	0.524301	LA_noukb	Laryngeal cancer (excl. UKB)	Laryngeal cancer (excl. UKB) || ||	TRUE	igd	NA	NA	NA	NA	NA	NA	NA	15	78024806	0.0022	6.187e-14	484680	BMI_strict	TRUE	reported	HKLPXU	textfile	2	1	TRUE
	rs56161855	A	T	A	T	-0.0233	-0.0112255	0.8678	0.861915	FALSE	TRUE	FALSE	ieu-b-5125	17	46288649	0.0489103	NA	0.818471	LA_noukb	Laryngeal cancer (excl. UKB)	Laryngeal cancer (excl. UKB) || ||	TRUE	igd	NA	NA	NA	NA	NA	NA	NA	17	46288649	0.0028	1.408e-16	484680	BMI_strict	TRUE	reported	HKLPXU	textfile	2	1	TRUE
	rs562664	T	C	T	C	-0.0138	-0.00988278	0.1873	0.195094	FALSE	FALSE	FALSE	ieu-b-5125	11	63823619	0.0431711	NA	0.81893	LA_noukb	Laryngeal cancer (excl. UKB)	Laryngeal cancer (excl. UKB) || ||	TRUE	igd	NA	NA	NA	NA	NA	NA	NA	11	63823619	0.0022	4.15e-10	696578	BMI_strict	TRUE	reported	HKLPXU	textfile	2	1	TRUE
	rs570463	A	C	A	C	-0.0121	0.0201308	0.3266	0.311668	FALSE	FALSE	FALSE	ieu-b-5125	11	28739318	0.0370503	NA	0.586897	LA_noukb	Laryngeal cancer (excl. UKB)	Laryngeal cancer (excl. UKB) || ||	TRUE	igd	NA	NA	NA	NA	NA	NA	NA	11	28739318	0.0018	4.33e-11	718580	BMI_strict	TRUE	reported	HKLPXU	textfile	2	1	TRUE
	rs57989773	T	C	T	C	-0.0142	0.0496504	0.7576	0.771971	FALSE	FALSE	FALSE	ieu-b-5125	6	100629078	0.0420846	NA	0.23809	LA_noukb	Laryngeal cancer (excl. UKB)	Laryngeal cancer (excl. UKB) || ||	TRUE	igd	NA	NA	NA	NA	NA	NA	NA	6	100629078	0.0023	5.63e-10	484680	BMI_strict	TRUE	reported	HKLPXU	textfile	2	1	TRUE
	rs587271	T	C	T	C	0.012	0.0145102	0.69	0.671297	FALSE	FALSE	FALSE	ieu-b-5125	1	54743111	0.0382981	NA	0.704781	LA_noukb	Laryngeal cancer (excl. UKB)	Laryngeal cancer (excl. UKB) || ||	TRUE	igd	NA	NA	NA	NA	NA	NA	NA	1	54743111	0.0018	6.208e-11	789324	BMI_strict	TRUE	reported	HKLPXU	textfile	2	1	TRUE
	rs592483	T	C	T	C	-0.0137	0.020876	0.5933	0.570547	FALSE	FALSE	FALSE	ieu-b-5125	11	69445173	0.0353523	NA	0.554847	LA_noukb	Laryngeal cancer (excl. UKB)	Laryngeal cancer (excl. UKB) || ||	TRUE	igd	NA	NA	NA	NA	NA	NA	NA	11	69445173	0.0017	1.525e-16	802791	BMI_strict	TRUE	reported	HKLPXU	textfile	2	1	TRUE
	rs59302296	A	T	A	T	0.0217	0.0596532	0.0991	0.108449	FALSE	TRUE	FALSE	ieu-b-5125	3	9507314	0.0537025	NA	0.26665	LA_noukb	Laryngeal cancer (excl. UKB)	Laryngeal cancer (excl. UKB) || ||	TRUE	igd	NA	NA	NA	NA	NA	NA	NA	3	9507314	0.0032	9.124e-12	484680	BMI_strict	TRUE	reported	HKLPXU	textfile	2	1	TRUE
	rs6010784	T	C	T	C	0.0106	0.023559	0.5062	0.496026	FALSE	FALSE	FALSE	ieu-b-5125	20	61540319	0.0338938	NA	0.487002	LA_noukb	Laryngeal cancer (excl. UKB)	Laryngeal cancer (excl. UKB) || ||	TRUE	igd	NA	NA	NA	NA	NA	NA	NA	20	61540319	0.0016	6.906e-11	803088	BMI_strict	TRUE	reported	HKLPXU	textfile	2	1	TRUE
	rs61740466	A	G	A	G	-0.0142	0.0117024	0.2346	0.234918	FALSE	FALSE	FALSE	ieu-b-5125	1	19934900	0.0401379	NA	0.770627	LA_noukb	Laryngeal cancer (excl. UKB)	Laryngeal cancer (excl. UKB) || ||	TRUE	igd	NA	NA	NA	NA	NA	NA	NA	1	19934900	0.0022	2.24e-10	484680	BMI_strict	TRUE	reported	HKLPXU	textfile	2	1	TRUE
	rs61813324	T	C	T	C	0.0289	0.0291946	0.1312	0.13807	FALSE	FALSE	FALSE	ieu-b-5125	1	156049877	0.0514665	NA	0.570541	LA_noukb	Laryngeal cancer (excl. UKB)	Laryngeal cancer (excl. UKB) || ||	TRUE	igd	NA	NA	NA	NA	NA	NA	NA	1	156049877	0.0028	3.196e-24	484680	BMI_strict	TRUE	reported	HKLPXU	textfile	2	1	TRUE
	rs61828641	A	G	A	G	0.0223	-0.0495963	0.1092	0.105455	FALSE	FALSE	FALSE	ieu-b-5125	1	174321997	0.0667915	NA	0.457751	LA_noukb	Laryngeal cancer (excl. UKB)	Laryngeal cancer (excl. UKB) || ||	TRUE	igd	NA	NA	NA	NA	NA	NA	NA	1	174321997	0.003	2.492e-13	484680	BMI_strict	TRUE	reported	HKLPXU	textfile	2	1	TRUE
	rs62176243	A	T	A	T	0.0148	0.0872487	0.7571	0.753982	FALSE	TRUE	FALSE	ieu-b-5125	2	166190881	0.0396921	NA	0.0279389	LA_noukb	Laryngeal cancer (excl. UKB)	Laryngeal cancer (excl. UKB) || ||	TRUE	igd	NA	NA	NA	NA	NA	NA	NA	2	166190881	0.0022	2.411e-11	484680	BMI_strict	TRUE	reported	HKLPXU	textfile	2	1	TRUE
	rs6265	T	C	T	C	-0.0413	-0.0164511	0.1836	0.184475	FALSE	FALSE	FALSE	ieu-b-5125	11	27679916	0.043662	NA	0.706334	LA_noukb	Laryngeal cancer (excl. UKB)	Laryngeal cancer (excl. UKB) || ||	TRUE	igd	NA	NA	NA	NA	NA	NA	NA	11	27679916	0.0021	7.399e-89	806782	BMI_strict	TRUE	reported	HKLPXU	textfile	2	1	TRUE
	rs6443750	T	C	T	C	-0.0152	-0.00873985	0.1994	0.206599	FALSE	FALSE	FALSE	ieu-b-5125	3	181329682	0.0458106	NA	0.848696	LA_noukb	Laryngeal cancer (excl. UKB)	Laryngeal cancer (excl. UKB) || ||	TRUE	igd	NA	NA	NA	NA	NA	NA	NA	3	181329682	0.0021	7.252e-13	792002	BMI_strict	TRUE	reported	HKLPXU	textfile	2	1	TRUE
	rs6463489	T	C	T	C	0.0167	-0.0247742	0.0959	0.114747	FALSE	FALSE	FALSE	ieu-b-5125	7	5542513	0.0555478	NA	0.655599	LA_noukb	Laryngeal cancer (excl. UKB)	Laryngeal cancer (excl. UKB) || ||	TRUE	igd	NA	NA	NA	NA	NA	NA	NA	7	5542513	0.0026	2.504e-10	805923	BMI_strict	TRUE	reported	HKLPXU	textfile	2	1	TRUE
	rs6468266	A	T	A	T	-0.0113	-0.00722089	0.4176	0.38873	FALSE	TRUE	FALSE	ieu-b-5125	8	34380276	0.0349031	NA	0.8361	LA_noukb	Laryngeal cancer (excl. UKB)	Laryngeal cancer (excl. UKB) || ||	TRUE	igd	NA	NA	NA	NA	NA	NA	NA	8	34380276	0.0017	7.708e-11	718278	BMI_strict	TRUE	reported	HKLPXU	textfile	2	1	TRUE
	rs6493498	T	C	T	C	0.0137	-0.0125047	0.4465	0.445218	FALSE	FALSE	FALSE	ieu-b-5125	15	51754451	0.0344518	NA	0.716633	LA_noukb	Laryngeal cancer (excl. UKB)	Laryngeal cancer (excl. UKB) || ||	TRUE	igd	NA	NA	NA	NA	NA	NA	NA	15	51754451	0.0016	4.838e-17	805967	BMI_strict	TRUE	reported	HKLPXU	textfile	2	1	TRUE
	rs6496248	A	T	A	T	0.0104	-0.0040661	0.6352	0.620767	FALSE	TRUE	FALSE	ieu-b-5125	15	98262923	0.0353273	NA	0.908367	LA_noukb	Laryngeal cancer (excl. UKB)	Laryngeal cancer (excl. UKB) || ||	TRUE	igd	NA	NA	NA	NA	NA	NA	NA	15	98262923	0.0018	2.929e-09	717972	BMI_strict	TRUE	reported	HKLPXU	textfile	2	1	TRUE
	rs6500208	A	G	A	G	0.0146	-0.10051	0.2021	0.204958	FALSE	FALSE	FALSE	ieu-b-5125	16	49011249	0.0433064	NA	0.0202918	LA_noukb	Laryngeal cancer (excl. UKB)	Laryngeal cancer (excl. UKB) || ||	TRUE	igd	NA	NA	NA	NA	NA	NA	NA	16	49011249	0.002	3.211e-13	794515	BMI_strict	TRUE	reported	HKLPXU	textfile	2	1	TRUE
	rs650198	T	C	T	C	-0.0137	0.0289267	0.7294	0.710322	FALSE	FALSE	FALSE	ieu-b-5125	12	69674595	0.0381797	NA	0.448662	LA_noukb	Laryngeal cancer (excl. UKB)	Laryngeal cancer (excl. UKB) || ||	TRUE	igd	NA	NA	NA	NA	NA	NA	NA	12	69674595	0.0019	6.425e-13	714521	BMI_strict	TRUE	reported	HKLPXU	textfile	2	1	TRUE
	rs6512302	C	G	C	G	0.0134	0.0432647	0.7391	0.739896	FALSE	TRUE	FALSE	ieu-b-5125	20	62691550	0.040482	NA	0.285187	LA_noukb	Laryngeal cancer (excl. UKB)	Laryngeal cancer (excl. UKB) || ||	TRUE	igd	NA	NA	NA	NA	NA	NA	NA	20	62691550	0.002	1.522e-11	718338	BMI_strict	TRUE	reported	HKLPXU	textfile	2	1	TRUE
	rs6539064	C	G	C	G	0.0194	-0.0139977	0.7468	0.749719	FALSE	TRUE	FALSE	ieu-b-5125	12	103706754	0.0389205	NA	0.719109	LA_noukb	Laryngeal cancer (excl. UKB)	Laryngeal cancer (excl. UKB) || ||	TRUE	igd	NA	NA	NA	NA	NA	NA	NA	12	103706754	0.0019	1.135e-23	718487	BMI_strict	TRUE	reported	HKLPXU	textfile	2	1	TRUE
	rs6545714	A	G	A	G	-0.0194	-0.0418354	0.6112	0.599329	FALSE	FALSE	FALSE	ieu-b-5125	2	59307725	0.0347087	NA	0.228076	LA_noukb	Laryngeal cancer (excl. UKB)	Laryngeal cancer (excl. UKB) || ||	TRUE	igd	NA	NA	NA	NA	NA	NA	NA	2	59307725	0.0016	4.013e-32	806783	BMI_strict	TRUE	reported	HKLPXU	textfile	2	1	TRUE
	rs6556301	T	G	T	G	-0.0113	0.00540089	0.3707	0.36546	FALSE	FALSE	FALSE	ieu-b-5125	5	176527577	0.0356066	NA	0.879438	LA_noukb	Laryngeal cancer (excl. UKB)	Laryngeal cancer (excl. UKB) || ||	TRUE	igd	NA	NA	NA	NA	NA	NA	NA	5	176527577	0.0017	8.137e-11	767716	BMI_strict	TRUE	reported	HKLPXU	textfile	2	1	TRUE
	rs6567160	T	C	T	C	-0.0552	-0.0146398	0.7518	0.765791	FALSE	FALSE	FALSE	ieu-b-5125	18	57829135	0.0402886	NA	0.716326	LA_noukb	Laryngeal cancer (excl. UKB)	Laryngeal cancer (excl. UKB) || ||	TRUE	igd	NA	NA	NA	NA	NA	NA	NA	18	57829135	0.0019	7.82e-184	806638	BMI_strict	TRUE	reported	HKLPXU	textfile	2	1	TRUE
	rs657452	A	G	A	G	0.0188	0.0427793	0.4042	0.388895	FALSE	FALSE	FALSE	ieu-b-5125	1	49589847	0.0349937	NA	0.221525	LA_noukb	Laryngeal cancer (excl. UKB)	Laryngeal cancer (excl. UKB) || ||	TRUE	igd	NA	NA	NA	NA	NA	NA	NA	1	49589847	0.0016	3.172e-30	798331	BMI_strict	TRUE	reported	HKLPXU	textfile	2	1	TRUE
	rs6591407	A	C	A	C	-0.0124	0.000958792	0.1984	0.19219	FALSE	FALSE	FALSE	ieu-b-5125	11	56914157	0.0432647	NA	0.982319	LA_noukb	Laryngeal cancer (excl. UKB)	Laryngeal cancer (excl. UKB) || ||	TRUE	igd	NA	NA	NA	NA	NA	NA	NA	11	56914157	0.0021	3.583e-09	806782	BMI_strict	TRUE	reported	HKLPXU	textfile	2	1	TRUE
	rs6607337	T	C	T	C	-0.0124	-0.0351673	0.2978	0.290567	FALSE	FALSE	FALSE	ieu-b-5125	17	35057373	0.0378904	NA	0.353339	LA_noukb	Laryngeal cancer (excl. UKB)	Laryngeal cancer (excl. UKB) || ||	TRUE	igd	NA	NA	NA	NA	NA	NA	NA	17	35057373	0.0019	2.548e-11	718656	BMI_strict	TRUE	reported	HKLPXU	textfile	2	1	TRUE
	rs6656785	A	G	A	G	-0.0178	-0.00375934	0.6125	0.621098	FALSE	FALSE	FALSE	ieu-b-5125	1	75005776	0.0355265	NA	0.915727	LA_noukb	Laryngeal cancer (excl. UKB)	Laryngeal cancer (excl. UKB) || ||	TRUE	igd	NA	NA	NA	NA	NA	NA	NA	1	75005776	0.0016	3.056e-27	806090	BMI_strict	TRUE	reported	HKLPXU	textfile	2	1	TRUE
	rs66595146	A	C	A	C	0.0135	-0.0452437	0.6291	0.621411	FALSE	FALSE	FALSE	ieu-b-5125	18	58204315	0.0351796	NA	0.198416	LA_noukb	Laryngeal cancer (excl. UKB)	Laryngeal cancer (excl. UKB) || ||	TRUE	igd	NA	NA	NA	NA	NA	NA	NA	18	58204315	0.002	9.093e-12	484680	BMI_strict	TRUE	reported	HKLPXU	textfile	2	1	TRUE
	rs6661316	T	C	T	C	0.012	0.0150209	0.5893	0.570428	FALSE	FALSE	FALSE	ieu-b-5125	1	210095527	0.0346514	NA	0.664661	LA_noukb	Laryngeal cancer (excl. UKB)	Laryngeal cancer (excl. UKB) || ||	TRUE	igd	NA	NA	NA	NA	NA	NA	NA	1	210095527	0.0016	1.721e-13	806610	BMI_strict	TRUE	reported	HKLPXU	textfile	2	1	TRUE
	rs6696828	C	G	C	G	0.012	0.00997268	0.2976	0.297622	FALSE	TRUE	FALSE	ieu-b-5125	1	80812020	0.0377303	NA	0.791537	LA_noukb	Laryngeal cancer (excl. UKB)	Laryngeal cancer (excl. UKB) || ||	TRUE	igd	NA	NA	NA	NA	NA	NA	NA	1	80812020	0.0018	6.415e-11	718664	BMI_strict	TRUE	reported	HKLPXU	textfile	2	1	TRUE
	rs6716898	A	G	A	G	0.0127	0.107667	0.4873	0.48862	FALSE	FALSE	FALSE	ieu-b-5125	2	198944271	0.0343283	NA	0.00171033	LA_noukb	Laryngeal cancer (excl. UKB)	Laryngeal cancer (excl. UKB) || ||	TRUE	igd	NA	NA	NA	NA	NA	NA	NA	2	198944271	0.0019	2.33e-11	484680	BMI_strict	TRUE	reported	HKLPXU	textfile	2	1	TRUE
	rs6720868	T	C	T	C	0.0154	-0.0582645	0.3083	0.318275	FALSE	FALSE	FALSE	ieu-b-5125	2	230663576	0.036742	NA	0.112791	LA_noukb	Laryngeal cancer (excl. UKB)	Laryngeal cancer (excl. UKB) || ||	TRUE	igd	NA	NA	NA	NA	NA	NA	NA	2	230663576	0.0018	1.824e-17	718504	BMI_strict	TRUE	reported	HKLPXU	textfile	2	1	TRUE
	rs6725931	T	C	T	C	0.0187	-0.00976134	0.8483	0.842284	FALSE	FALSE	FALSE	ieu-b-5125	2	220205146	0.0478467	NA	0.838343	LA_noukb	Laryngeal cancer (excl. UKB)	Laryngeal cancer (excl. UKB) || ||	TRUE	igd	NA	NA	NA	NA	NA	NA	NA	2	220205146	0.0024	2.297e-15	718689	BMI_strict	TRUE	reported	HKLPXU	textfile	2	1	TRUE
	rs6804842	A	G	A	G	-0.0141	0.0167163	0.4301	0.420995	FALSE	FALSE	FALSE	ieu-b-5125	3	25106437	0.0342897	NA	0.625902	LA_noukb	Laryngeal cancer (excl. UKB)	Laryngeal cancer (excl. UKB) || ||	TRUE	igd	NA	NA	NA	NA	NA	NA	NA	3	25106437	0.0016	7.57e-18	806143	BMI_strict	TRUE	reported	HKLPXU	textfile	2	1	TRUE
	rs6808814	T	C	T	C	0.0118	0.00439879	0.7335	0.740632	FALSE	FALSE	FALSE	ieu-b-5125	3	116852469	0.0395806	NA	0.911509	LA_noukb	Laryngeal cancer (excl. UKB)	Laryngeal cancer (excl. UKB) || ||	TRUE	igd	NA	NA	NA	NA	NA	NA	NA	3	116852469	0.0019	1.305e-09	718249	BMI_strict	TRUE	reported	HKLPXU	textfile	2	1	TRUE
	rs6850421	A	G	A	G	0.0113	0.0225971	0.4564	0.473278	FALSE	FALSE	FALSE	ieu-b-5125	4	180187034	0.034201	NA	0.508795	LA_noukb	Laryngeal cancer (excl. UKB)	Laryngeal cancer (excl. UKB) || ||	TRUE	igd	NA	NA	NA	NA	NA	NA	NA	4	180187034	0.0019	3.657e-09	484680	BMI_strict	TRUE	reported	HKLPXU	textfile	2	1	TRUE
	rs6864049	A	G	A	G	-0.0121	-0.0197442	0.489	0.477534	FALSE	FALSE	FALSE	ieu-b-5125	5	124330522	0.0341786	NA	0.563482	LA_noukb	Laryngeal cancer (excl. UKB)	Laryngeal cancer (excl. UKB) || ||	TRUE	igd	NA	NA	NA	NA	NA	NA	NA	5	124330522	0.0016	1.475e-13	806604	BMI_strict	TRUE	reported	HKLPXU	textfile	2	1	TRUE
	rs687339	T	C	T	C	0.0188	0.0647801	0.7697	0.777817	FALSE	FALSE	FALSE	ieu-b-5125	3	135932359	0.0417262	NA	0.120542	LA_noukb	Laryngeal cancer (excl. UKB)	Laryngeal cancer (excl. UKB) || ||	TRUE	igd	NA	NA	NA	NA	NA	NA	NA	3	135932359	0.0019	4.317e-22	806723	BMI_strict	TRUE	reported	HKLPXU	textfile	2	1	TRUE
	rs6882366	T	C	T	C	-0.0131	0.0183311	0.3959	0.386612	FALSE	FALSE	FALSE	ieu-b-5125	5	95864693	0.035015	NA	0.600611	LA_noukb	Laryngeal cancer (excl. UKB)	Laryngeal cancer (excl. UKB) || ||	TRUE	igd	NA	NA	NA	NA	NA	NA	NA	5	95864693	0.0017	4.387e-14	718668	BMI_strict	TRUE	reported	HKLPXU	textfile	2	1	TRUE
	rs6886072	T	C	T	C	-0.01	0.0116202	0.4665	0.47979	FALSE	FALSE	FALSE	ieu-b-5125	5	136598460	0.0345862	NA	0.736885	LA_noukb	Laryngeal cancer (excl. UKB)	Laryngeal cancer (excl. UKB) || ||	TRUE	igd	NA	NA	NA	NA	NA	NA	NA	5	136598460	0.0017	4.125e-09	718327	BMI_strict	TRUE	reported	HKLPXU	textfile	2	1	TRUE
	rs6890310	A	G	A	G	-0.0119	-0.010186	0.2923	0.281136	FALSE	FALSE	FALSE	ieu-b-5125	5	27193573	0.0379386	NA	0.788324	LA_noukb	Laryngeal cancer (excl. UKB)	Laryngeal cancer (excl. UKB) || ||	TRUE	igd	NA	NA	NA	NA	NA	NA	NA	5	27193573	0.0019	3.287e-10	718622	BMI_strict	TRUE	reported	HKLPXU	textfile	2	1	TRUE
	rs6893539	A	C	A	C	-0.0122	-0.00791664	0.6981	0.703402	FALSE	FALSE	FALSE	ieu-b-5125	5	122705737	0.037775	NA	0.834001	LA_noukb	Laryngeal cancer (excl. UKB)	Laryngeal cancer (excl. UKB) || ||	TRUE	igd	NA	NA	NA	NA	NA	NA	NA	5	122705737	0.0019	6.165e-11	718648	BMI_strict	TRUE	reported	HKLPXU	textfile	2	1	TRUE
	rs6909685	T	C	T	C	-0.0149	-0.0315212	0.3295	0.322148	FALSE	FALSE	FALSE	ieu-b-5125	6	97753952	0.0367574	NA	0.391143	LA_noukb	Laryngeal cancer (excl. UKB)	Laryngeal cancer (excl. UKB) || ||	TRUE	igd	NA	NA	NA	NA	NA	NA	NA	6	97753952	0.0018	2.782e-16	717696	BMI_strict	TRUE	reported	HKLPXU	textfile	2	1	TRUE
	rs6922607	A	G	A	G	-0.013	-0.0456273	0.808	0.810454	FALSE	FALSE	FALSE	ieu-b-5125	6	142703483	0.0428523	NA	0.286985	LA_noukb	Laryngeal cancer (excl. UKB)	Laryngeal cancer (excl. UKB) || ||	TRUE	igd	NA	NA	NA	NA	NA	NA	NA	6	142703483	0.0022	1.851e-09	706729	BMI_strict	TRUE	reported	HKLPXU	textfile	2	1	TRUE
	rs6950388	A	G	A	G	0.0135	0.00435118	0.7782	0.758857	FALSE	FALSE	FALSE	ieu-b-5125	7	1270699	0.0450517	NA	0.923058	LA_noukb	Laryngeal cancer (excl. UKB)	Laryngeal cancer (excl. UKB) || ||	TRUE	igd	NA	NA	NA	NA	NA	NA	NA	7	1270699	0.0022	1.588e-09	484680	BMI_strict	TRUE	reported	HKLPXU	textfile	2	1	TRUE
	rs698147	A	G	A	G	0.0116	0.00642048	0.447	0.458968	FALSE	FALSE	FALSE	ieu-b-5125	5	3513485	0.0340465	NA	0.850422	LA_noukb	Laryngeal cancer (excl. UKB)	Laryngeal cancer (excl. UKB) || ||	TRUE	igd	NA	NA	NA	NA	NA	NA	NA	5	3513485	0.0017	9.672e-12	716805	BMI_strict	TRUE	reported	HKLPXU	textfile	2	1	TRUE
	rs7024334	T	G	T	G	0.0135	0.0388427	0.2254	0.233505	FALSE	FALSE	FALSE	ieu-b-5125	9	109072075	0.0407864	NA	0.340922	LA_noukb	Laryngeal cancer (excl. UKB)	Laryngeal cancer (excl. UKB) || ||	TRUE	igd	NA	NA	NA	NA	NA	NA	NA	9	109072075	0.002	4.708e-12	799813	BMI_strict	TRUE	reported	HKLPXU	textfile	2	1	TRUE
	rs7025938	C	G	C	G	-0.0162	-0.0453157	0.6798	0.67442	FALSE	TRUE	FALSE	ieu-b-5125	9	103088321	0.0365307	NA	0.214797	LA_noukb	Laryngeal cancer (excl. UKB)	Laryngeal cancer (excl. UKB) || ||	TRUE	igd	NA	NA	NA	NA	NA	NA	NA	9	103088321	0.0018	1.47e-19	717817	BMI_strict	TRUE	reported	HKLPXU	textfile	2	1	TRUE
	rs7070670	T	C	T	C	-0.0126	0.00177378	0.3228	0.316734	FALSE	FALSE	FALSE	ieu-b-5125	10	61842645	0.0368857	NA	0.961646	LA_noukb	Laryngeal cancer (excl. UKB)	Laryngeal cancer (excl. UKB) || ||	TRUE	igd	NA	NA	NA	NA	NA	NA	NA	10	61842645	0.0021	7.143e-10	484680	BMI_strict	TRUE	reported	HKLPXU	textfile	2	1	TRUE
	rs7084454	A	G	A	G	0.0198	0.0103609	0.3086	0.32997	FALSE	FALSE	FALSE	ieu-b-5125	10	21821274	0.0364957	NA	0.776494	LA_noukb	Laryngeal cancer (excl. UKB)	Laryngeal cancer (excl. UKB) || ||	TRUE	igd	NA	NA	NA	NA	NA	NA	NA	10	21821274	0.0018	4.505e-27	706792	BMI_strict	TRUE	reported	HKLPXU	textfile	2	1	TRUE
[truncated: 5,309 more rows]

## Sheet: Table B
Table B. Harmonised data for secondary MR analyses (four body shape principal components and HNC/HPC/LA/OC/OPC_NEG/OPC_POS)
[truncated: 895 more rows]

## Sheet: Table C
Table C. Harmonised data for secondary MR analyses (childhood and adulthood body size and HNC/HPC/LA/OC/OPC_NEG/OPC_POS)
[truncated: 3,229 more rows]

## Sheet: Table D
Table D. Harmonised data for secondary MR analyses (favourable and unfavourable adiposity and HNC/HPC/LA/OC/OPC_NEG/OPC_POS)
[truncated: 361 more rows]

[truncated: 10 more sheets: Table E, Table F, Table G, Table H, Table I, Table J, Table K, Table L, Table M, Table N]
